# Supplementary material for: Genome-Wide Analysis of Light- and Temperature-Entrained Circadian Transcripts in Caenorhabditis elegans
Source: PLoS Biol. 2010 Oct 12;8(10):e1000503. doi: 10.1371/journal.pbio.1000503 (PMC2953524; doi:10.1371/journal.pbio.1000503)
Supplement: Table S2 — GO categories and lists of all light- and temperature-driven transcripts. (1.18 MB XLS) [file pbio.1000503.s006.xls]

## Sheet: Light and Temperature Driven
Supplemental Table 2. GO categories and lists of all light- and temperature-driven transcripts.
LD 3-day appended data set														WC 5-day appended data set
Transcripts that cycle in LD but not in DD (pF24<0.02)														Transcripts that cycle in WC but not in CC (pF24<0.02)
Affymetrix	Fourier		ANOVA			AC24		Fold change	Expression	WS195 Wormbase				Affymetrix	Fourier		ANOVA			AC24		Fold change	Expression	WS195 Wormbase
Probe ID set	F24	p-value	F	p-value	Phase	Avg	Max	LD	Avg	Gene Public Name	Sequence Name	GoTerm info	Gene WB ID	Probe ID set	F24	p-value	F	p-value	Phase	Avg	Max	WC	Avg	Gene Public Name	Sequence Name	GoTerm info	Gene WB ID
171737_x_at	0.59337	0.0028	4.1465	0.020248	6.059	0.383516	0.749643	3.22927	116344	T12G3.1	T12G3.1	[GO:0008270] MOLECULAR_FUNCTION zinc ion binding (IEA)	WBGene00011737	171737_x_at	0.41242	0.0004	5.2395	0.0021635	16.856	0.240777	0.612271	5.77637	101038	T12G3.1	T12G3.1	[GO:0008270] MOLECULAR_FUNCTION zinc ion binding (IEA)	WBGene00011737
171746_x_at	0.49942	0.0075	3.5599	0.033204	5.877	0.308707	0.732147	2.8186	15428.5	F15G9.1	F15G9.1		WBGene00008865	171738_x_at	0.33885	0.0023	4.3491	0.005852	19.001	0.268939	0.609499	2.92249	14056.1	unc-44	B0350.2	[GO:0016328] CELLULAR_COMPONENT lateral plasma membrane (IDA) via [WBPaper00004127] Moorthy S et al. (2000) | [GO:0040018] BIOLOGICAL_PROCESS positive regulation of multicellular organism growth (IMP) | [GO:0040011] BIOLOGICAL_PROCESS locomotion (IMP) | [GO:0005515] MOLECULAR_FUNCTION protein binding (IEA) | [GO:0007165] BIOLOGICAL_PROCESS signal transduction (IEA) | [GO:0004553] MOLECULAR_FUNCTI…	WBGene00006780
171776_x_at	0.44897	0.013	4.4466	0.015939	20.756	0.475595	0.634463	1.66658	726114	cpg-1	C07G2.1	[GO:0005576] CELLULAR_COMPONENT extracellular region (IEA) | [GO:0006030] BIOLOGICAL_PROCESS chitin metabolic process (IEA) | [GO:0008061] MOLECULAR_FUNCTION chitin binding (IEA)	WBGene00000465	171748_x_at	0.30343	0.0072	4.9612	0.0029303	19.63	0.338395	0.58124	1.73905	278158	unc-60	C38C3.5
171924_x_at	0.46297	0.0008	4.757	0.012557	6.563	0.502411	0.636971	3.53079	87192.4	unc-87	F08B6.4	[GO:0005865] CELLULAR_COMPONENT striated muscle thin filament (IDA) via [WBPaper00030902] Yamashiro S et al. (2007) | [GO:0040011] BIOLOGICAL_PROCESS locomotion (IMP)	WBGene00006819	171754_x_at	0.52446	0.0002	11.6692	8.52e-06	20.205	0.533151	0.660753	4.3482	703.476	Y15E3A.4	Y15E3A.4	[GO:0005215] MOLECULAR_FUNCTION transporter activity (IEA) | [GO:0006810] BIOLOGICAL_PROCESS transport (IEA) | [GO:0016021] CELLULAR_COMPONENT integral to membrane (IEA)	WBGene00012443
171965_x_at	0.48709	0.0074	3.203	0.045712	17.276	0.36704	0.491253	2.16419	73799	tag-349	Y73F8A.34	[GO:0008270] MOLECULAR_FUNCTION zinc ion binding (IEA)	WBGene00013538	171766_x_at	0.27306	0.0097	4.9928	0.0028301	22.085	0.402035	0.837162	7.02947	4652.27	F29G6.3	F29G6.3	[GO:0000003] BIOLOGICAL_PROCESS reproduction (IMP) | [GO:0040010] BIOLOGICAL_PROCESS positive regulation of growth rate (IMP) | [GO:0010171] BIOLOGICAL_PROCESS body morphogenesis (IMP)	WBGene00009259
171988_at	0.7069	0	8.9485	0.00097217	5.6	0.68824	0.766548	2.3312	49667.8	ost-1	C42B12.2			171769_x_at	0.58358	0	8.5171	9.51e-05	7.21	0.564388	0.85073	8.20171	40823.7	F23F12.12	F23F12.12	[GO:0016021] CELLULAR_COMPONENT integral to membrane (IEA)	WBGene00017756
172004_x_at	0.51055	0.0012	5.68	0.0064866	6.841	0.555632	0.75533	3.22909	172835	unc-87	F08B6.4	[GO:0005865] CELLULAR_COMPONENT striated muscle thin filament (IDA) via [WBPaper00030902] Yamashiro S et al. (2007) | [GO:0040011] BIOLOGICAL_PROCESS locomotion (IMP)	WBGene00006819	171785_x_at	0.39524	0.0002	5.1663	0.0023417	7.651	0.396739	0.880807	2.62693	31443.2	C37C3.2	C37C3.2	[GO:0003743] MOLECULAR_FUNCTION translation initiation factor activity (IEA) | [GO:0006413] BIOLOGICAL_PROCESS translational initiation (IEA) | [GO:0000003] BIOLOGICAL_PROCESS reproduction (IMP) | [GO:0040010] BIOLOGICAL_PROCESS positive regulation of growth rate (IMP) | [GO:0009792] BIOLOGICAL_PROCESS embryonic development ending in birth or egg hatching (IMP) | [GO:0002119] BIOLOGICAL_PROCESS n…	WBGene00016496
172043_x_at	0.47259	0.0025	4.0088	0.022667	6.548	0.453545	0.620329	2.82517	275799	lec-2	F52H3.7	[GO:0005529] MOLECULAR_FUNCTION sugar binding (IEA)	WBGene00002265	171795_x_at	0.3784	0.0012	3.4768	0.016673	3.526	0.218679	0.50827	16.9662	1329.4	R12E2.14	R12E2.14		WBGene00020039
172046_x_at	0.43898	0.0017	4.3019	0.01787	6.953	0.445375	0.573492	2.9085	161545	hgo-1	W06D4.1	[GO:0004411] MOLECULAR_FUNCTION homogentisate 1,2-dioxygenase activity (IEA) | [GO:0006559] BIOLOGICAL_PROCESS L-phenylalanine catabolic process (IEA) | [GO:0006570] BIOLOGICAL_PROCESS tyrosine metabolic process (IEA)	WBGene00001843	171807_x_at	0.28971	0.0051	3.046	0.028732	4.237	0.112574	0.467918	3.01351	49.7297	C02E7.7	C02E7.7		WBGene00015340
172079_s_at	0.61487	0.0003	4.299	0.017911	16.124	0.403423	0.654599	3.58958	4807.77	Y105E8B.6	Y105E8B.6		WBGene00013691	171817_x_at	0.29125	0.0048	3.468	0.016857	6.505	0.0831222	0.820697	2.26325	168045	Y38F2AR.9	Y38F2AR.9	[GO:0016021] CELLULAR_COMPONENT integral to membrane (IEA)	WBGene00021427
172100_x_at	0.39923	0.0045	3.2306	0.044572	7.019	0.383726	0.501558	2.32705	1.74301e+06	mlc-2	C36E6.5	[GO:0043051] BIOLOGICAL_PROCESS regulation of pharyngeal pumping (IMP) via [WBPaper00003259] Rushforth AM et al. (1998) | [GO:0002119] BIOLOGICAL_PROCESS nematode larval development (IMP) via [WBPaper00003259] Rushforth AM et al. (1998) | [GO:0002119] BIOLOGICAL_PROCESS nematode larval development (IGI) via [WBPaper00003259] Rushforth AM et al. (1998) | [GO:0040011] BIOLOGICAL_PROCESS locomotion …	WBGene00003370	171824_x_at	0.31253	0.0065	3.5955	0.014397	0.559	0.348904	0.656672	2.56099	24443.9	ftn-2	D1037.3	[GO:0005488] MOLECULAR_FUNCTION binding (IEA) | [GO:0006826] BIOLOGICAL_PROCESS iron ion transport (IEA) | [GO:0006879] BIOLOGICAL_PROCESS cellular iron ion homeostasis (IEA) | [GO:0008199] MOLECULAR_FUNCTION ferric iron binding (IEA) | [GO:0040010] BIOLOGICAL_PROCESS positive regulation of growth rate (IMP)	WBGene00001501
172227_x_at	0.43489	0.0103	3.5286	0.034127	6.261	0.318504	0.578446	5.71641	570171	K07A1.6	K07A1.6		WBGene00010613	171827_x_at	0.27287	0.0093	3.164	0.024711	11.168	0.0130586	0.300803	3.01557	6338.68	ccg-1	Y73F8A.6		WBGene00000370
172363_x_at	0.43773	0.0084	3.2669	0.043124	6.837	0.337327	0.574935	3.21393	18240.6	F53A9.6	F53A9.6		WBGene00018729	171865_x_at	0.2267	0.0103	2.9886	0.030932	20.328	0.0611625	0.528429	1.5996	1155	pmt-1	ZK622.3	[GO:0009792] BIOLOGICAL_PROCESS embryonic development ending in birth or egg hatching (IMP) | [GO:0002119] BIOLOGICAL_PROCESS nematode larval development (IMP) | [GO:0040007] BIOLOGICAL_PROCESS growth (IMP) | [GO:0040010] BIOLOGICAL_PROCESS positive regulation of growth rate (IMP) | [GO:0040017] BIOLOGICAL_PROCESS positive regulation of locomotion (IMP) | [GO:0040011] BIOLOGICAL_PROCESS locomotio…	WBGene00022781
172405_x_at	0.48263	0.0056	8.7466	0.0010763	7.14	0.625873	0.872959	3.62769	17247.1	cnc-3	R09B5.8	[GO:0016021] CELLULAR_COMPONENT integral to membrane (IEA)	WBGene00000557	171883_x_at	0.48416	0	7.5419	0.00022305	13.866	0.401115	0.598906	2.75604	128.343	K02F6.7	K02F6.7		WBGene00019341
172468_x_at	0.40769	0.0032	4.2325	0.018889	7.904	0.436897	0.475112	3.38364	2327.47	K01A2.12	K01A2.12	[GO:0016021] CELLULAR_COMPONENT integral to membrane (IEA)	WBGene00086561	171921_x_at	0.29646	0.0025	3.0501	0.028579	4.206	0.0621198	0.571992	19.7513	26633.1	hil-7	C01B10.5	[GO:0000786] CELLULAR_COMPONENT nucleosome (IEA) | [GO:0003677] MOLECULAR_FUNCTION DNA binding (IEA) | [GO:0005634] CELLULAR_COMPONENT nucleus (IEA) | [GO:0006334] BIOLOGICAL_PROCESS nucleosome assembly (IEA) | [GO:0009792] BIOLOGICAL_PROCESS embryonic development ending in birth or egg hatching (IMP)	WBGene00001858
172516_x_at	0.44651	0.0087	3.4919	0.035248	6.59	0.377229	0.59969	2.68447	21032.1	Y39G8B.1	Y39G8B.1	[GO:0016491] MOLECULAR_FUNCTION oxidoreductase activity (IEA)	WBGene00012722	171926_x_at	0.5197	0	13.529	2.49e-06	20.807	0.657614	0.704429	1.85292	2700.89	dhs-28	M03A8.1	[GO:0008152] BIOLOGICAL_PROCESS metabolic process (IEA) | [GO:0016491] MOLECULAR_FUNCTION oxidoreductase activity (IEA) | [GO:0003824] MOLECULAR_FUNCTION catalytic activity (IEA) | [GO:0005488] MOLECULAR_FUNCTION binding (IEA) | [GO:0040010] BIOLOGICAL_PROCESS positive regulation of growth rate (IMP)	WBGene00000991
172526_x_at	0.40437	0.0059	4.9474	0.010895	7.533	0.482391	0.563996	3.3227	2439.26	mps-2	K01A2.8	[GO:0043266] BIOLOGICAL_PROCESS regulation of potassium ion transport (IDA) via [WBPaper00025063] Park KH et al. (2005) | [GO:0050920] BIOLOGICAL_PROCESS regulation of chemotaxis (IMP) via [WBPaper00025063] Park KH et al. (2005) | [GO:0015459] MOLECULAR_FUNCTION potassium channel regulator activity (IDA) via [WBPaper00025063] Park KH et al. (2005) | [GO:0016021] CELLULAR_COMPONENT integral to mem…	WBGene00019282	171938_x_at	0.39175	0.0001	4.4912	0.0049683	12.156	0.234832	0.490673	2.34581	27453.9	crt-1	Y38A10A.5	[GO:0043071] BIOLOGICAL_PROCESS positive regulation of non-apoptotic programmed cell death (IGI) via [WBPaper00026649] Syntichaki P et al. (2005) Curr Biol "The Vacuolar H(+) | [GO:0030421] BIOLOGICAL_PROCESS defecation (IGI) via [WBPaper00004858] Park BJ et al. (2001) | [GO:0048609] BIOLOGICAL_PROCESS reproductive process in a multicellular organism (IGI) via [WBPaper00004858] Park BJ et al. (20…	WBGene00000802
172541_x_at	0.50069	0.0025	6.1572	0.0047284	7.256	0.553769	0.696509	3.15394	7621.59	mps-2	K01A2.8	[GO:0043266] BIOLOGICAL_PROCESS regulation of potassium ion transport (IDA) via [WBPaper00025063] Park KH et al. (2005) | [GO:0050920] BIOLOGICAL_PROCESS regulation of chemotaxis (IMP) via [WBPaper00025063] Park KH et al. (2005) | [GO:0015459] MOLECULAR_FUNCTION potassium channel regulator activity (IDA) via [WBPaper00025063] Park KH et al. (2005) | [GO:0016021] CELLULAR_COMPONENT integral to mem…	WBGene00019282	171941_s_at	0.47724	0.0001	4.9872	0.0028474	7.234	0.451553	0.666269	20.2842	35965.3	F44E5.5	F44E5.5	[GO:0005524] MOLECULAR_FUNCTION ATP binding (IEA)	WBGene00009692
172570_x_at	0.44318	0.0061	3.227	0.044719	7.636	0.358047	0.571942	2.42489	216420	Y51A2D.14	Y51A2D.14	[GO:0016021] CELLULAR_COMPONENT integral to membrane (IEA)	WBGene00013081	171964_s_at	0.24912	0.0166	2.8239	0.038293	13.9	0.114627	0.564527	2.06825	51959.7	T20B12.7	T20B12.7	[GO:0040010] BIOLOGICAL_PROCESS positive regulation of growth rate (IMP) | [GO:0009792] BIOLOGICAL_PROCESS embryonic development ending in birth or egg hatching (IMP) | [GO:0000003] BIOLOGICAL_PROCESS reproduction (IMP)	WBGene00020604
172626_at	0.47351	0.0066	7.1315	0.0025966	8.04	0.613437	0.697428	3.18892	5215.81	F07H5.4	F07H5.4			171966_x_at	0.51326	0	8.2535	0.00011906	8.08	0.558104	0.820594	3.43487	13560.7	calu-1	M03F4.7	[GO:0005509] MOLECULAR_FUNCTION calcium ion binding (IEA) | [GO:0018996] BIOLOGICAL_PROCESS molting cycle, collagen and cuticulin-based cuticle (IMP) | [GO:0040011] BIOLOGICAL_PROCESS locomotion (IMP) | [GO:0002119] BIOLOGICAL_PROCESS nematode larval development (IMP) | [GO:0040007] BIOLOGICAL_PROCESS growth (IMP)	WBGene00019760
172654_x_at	0.31979	0.0134	3.3557	0.039794	7.303	0.319471	0.611651	2.16716	5386	Y71F9B.13	Y71F9B.13		WBGene00022131	171968_x_at	0.44087	0.0005	4.3334	0.0059593	7.802	0.155763	0.592275	2.31831	19633.1	dnj-19	T05C3.5	[GO:0006457] BIOLOGICAL_PROCESS protein folding (IEA) | [GO:0031072] MOLECULAR_FUNCTION heat shock protein binding (IEA) | [GO:0051082] MOLECULAR_FUNCTION unfolded protein binding (IEA)	WBGene00001037
172656_x_at	0.39493	0.0059	3.3909	0.03856	6.308	0.370991	0.522863	2.19188	4758.41	Y71F9B.13	Y71F9B.13		WBGene00022131	171969_x_at	0.4563	0	6.9083	0.00040091	7.573	0.375486	0.588832	2.0486	3058.44	ZK669.4	ZK669.4	[GO:0005179] MOLECULAR_FUNCTION hormone activity (IEA) | [GO:0005576] CELLULAR_COMPONENT extracellular region (IEA) | [GO:0005515] MOLECULAR_FUNCTION protein binding (IEA) | [GO:0008152] BIOLOGICAL_PROCESS metabolic process (IEA) | [GO:0008415] MOLECULAR_FUNCTION acyltransferase activity (IEA) | [GO:0009792] BIOLOGICAL_PROCESS embryonic development ending in birth or egg hatching (IMP)	WBGene00014054
172671_x_at	0.44773	0.0061	5.4766	0.0074594	9.841	0.510706	0.659609	1.86623	23111.9	his-38	K03A1.6	[GO:0000786] CELLULAR_COMPONENT nucleosome (IEA) | [GO:0003677] MOLECULAR_FUNCTION DNA binding (IEA) | [GO:0005634] CELLULAR_COMPONENT nucleus (IEA) | [GO:0006334] BIOLOGICAL_PROCESS nucleosome assembly (IEA) | [GO:0040010] BIOLOGICAL_PROCESS positive regulation of growth rate (IMP) | [GO:0009792] BIOLOGICAL_PROCESS embryonic development ending in birth or egg hatching (IMP) | [GO:0040011] BIOLOG…	WBGene00001912	172025_x_at	0.22359	0.0131	2.7997	0.039522	4.306	0.320293	0.683038	2.00668	48628.4	nrf-6	C08B11.4	[GO:0016747] MOLECULAR_FUNCTION transferase activity, transferring groups other than amino-acyl groups (IEA) | [GO:0016021] CELLULAR_COMPONENT integral to membrane (IEA) | [GO:0009792] BIOLOGICAL_PROCESS embryonic development ending in birth or egg hatching (IMP) | [GO:0010171] BIOLOGICAL_PROCESS body morphogenesis (IMP) | [GO:0040017] BIOLOGICAL_PROCESS positive regulation of locomotion (IMP)	WBGene00003813
172697_x_at	0.52805	0.0012	3.7359	0.028513	6.17	0.485191	0.721459	1.90033	1.45299e+06	gpd-3	K10B3.7	[GO:0004365] MOLECULAR_FUNCTION glyceraldehyde-3-phosphate dehydrogenase (phosphorylating) activity (IEA) | [GO:0006006] BIOLOGICAL_PROCESS glucose metabolic process (IEA) | [GO:0051287] MOLECULAR_FUNCTION NAD binding (IEA) | [GO:0008943] MOLECULAR_FUNCTION glyceraldehyde-3-phosphate dehydrogenase activity (IEA) | [GO:0003824] MOLECULAR_FUNCTION catalytic activity (IEA) | [GO:0005488] MOLECULAR_F…	WBGene00001685	172031_x_at	0.28303	0.0077	4.3208	0.0060472	17.432	0.272377	0.500128	2.28056	11046.7	etr-1	T01D1.2	[GO:0008340] BIOLOGICAL_PROCESS determination of adult life span (IMP) via [WBPaper00031330] Wang LC et al. (2007) | [GO:0003676] MOLECULAR_FUNCTION nucleic acid binding (IEA) | [GO:0000166] MOLECULAR_FUNCTION nucleotide binding (IEA) | [GO:0009792] BIOLOGICAL_PROCESS embryonic development ending in birth or egg hatching (IMP) | [GO:0002119] BIOLOGICAL_PROCESS nematode larval development (IMP) | …	WBGene00001340
172715_x_at	0.45133	0.0093	4.3481	0.017225	10.944	0.489825	0.589611	1.96602	1360.41	nspc-14	F42F12.7		WBGene00009638	172039_x_at	0.20215	0.0178	2.7581	0.041731	8.645	0.229086	0.387082	2.40335	747.737	cst-1	F14H12.4	[GO:0004672] MOLECULAR_FUNCTION protein kinase activity (IEA) | [GO:0005524] MOLECULAR_FUNCTION ATP binding (IEA) | [GO:0006468] BIOLOGICAL_PROCESS protein amino acid phosphorylation (IEA) | [GO:0004713] MOLECULAR_FUNCTION protein tyrosine kinase activity (IEA) | [GO:0004674] MOLECULAR_FUNCTION protein serine/threonine kinase activity (IEA) | [GO:0005515] MOLECULAR_FUNCTION protein binding (IEA) …	WBGene00017472
172716_x_at	0.40705	0.0134	3.6784	0.029957	9.605	0.395564	0.506526	1.68127	17032	nspc-9	F42F12.1		WBGene00009634	172045_x_at	0.3144	0.0014	3.5946	0.014413	4.714	0.119398	0.591186	12.2774	20190.3	hil-7	C01B10.5	[GO:0000786] CELLULAR_COMPONENT nucleosome (IEA) | [GO:0003677] MOLECULAR_FUNCTION DNA binding (IEA) | [GO:0005634] CELLULAR_COMPONENT nucleus (IEA) | [GO:0006334] BIOLOGICAL_PROCESS nucleosome assembly (IEA) | [GO:0009792] BIOLOGICAL_PROCESS embryonic development ending in birth or egg hatching (IMP)	WBGene00001858
172739_at	0.55551	0.0005	4.1654	0.01994	16.253	0.433273	0.758183	1.62708	2187.53	ned-8	F45H11.2	[GO:0005634] CELLULAR_COMPONENT nucleus (IDA) via [WBPaper00006054] Pintard L et al. (2003) | [GO:0005737] CELLULAR_COMPONENT cytoplasm (IDA) via [WBPaper00006054] Pintard L et al. (2003) | [GO:0006464] BIOLOGICAL_PROCESS protein modification process (IEA) | [GO:0040010] BIOLOGICAL_PROCESS positive regulation of growth rate (IMP) | [GO:0002009] BIOLOGICAL_PROCESS morphogenesis of an epithelium (I…	WBGene00003587	172046_x_at	0.30125	0.0066	3.4394	0.017468	20.464	0.207284	0.761908	1.89186	105730	hgo-1	W06D4.1	[GO:0004411] MOLECULAR_FUNCTION homogentisate 1,2-dioxygenase activity (IEA) | [GO:0006559] BIOLOGICAL_PROCESS L-phenylalanine catabolic process (IEA) | [GO:0006570] BIOLOGICAL_PROCESS tyrosine metabolic process (IEA)	WBGene00001843
172864_x_at	0.48717	0.0068	3.4505	0.036565	17.076	0.322291	0.791743	4.0422	36189.3	kup-1	F10C2.2		WBGene00002241	172069_x_at	0.3037	0.0004	5.1697	0.002333	18.783	0.370057	0.795447	7.58649	30519	cpr-3	T10H4.12	[GO:0004197] MOLECULAR_FUNCTION cysteine-type endopeptidase activity (IEA) | [GO:0006508] BIOLOGICAL_PROCESS proteolysis (IEA) | [GO:0008234] MOLECULAR_FUNCTION cysteine-type peptidase activity (IEA) | [GO:0009792] BIOLOGICAL_PROCESS embryonic development ending in birth or egg hatching (IMP)	WBGene00000783
172901_x_at	0.52935	0.0029	4.2109	0.019221	8.26	0.48214	0.603108	5.03249	46687	hsp-16.49	T27E4.9	[GO:0030968] BIOLOGICAL_PROCESS endoplasmic reticulum unfolded protein response (IEP) via [WBPaper00005432] Urano F et al. (2002) | [GO:0008340] BIOLOGICAL_PROCESS determination of adult life span (IMP)	WBGene00002020	172079_s_at	0.26182	0.0159	2.8834	0.035442	11.472	0.083209	0.723218	3.89346	2852.32	Y105E8B.6	Y105E8B.6		WBGene00013691
172917_x_at	0.49866	0.0031	4.0765	0.021439	17.551	0.406206	0.483935	1.65407	27395.5	hpl-2	K01G5.2	[GO:0008406] BIOLOGICAL_PROCESS gonad development (IMP) via [WBPaper00028349] Schott S et al. (2006) | [GO:0008406] BIOLOGICAL_PROCESS gonad development (IGI) via [WBPaper00028349] Schott S et al. (2006) | [GO:0045595] BIOLOGICAL_PROCESS regulation of cell differentiation (IGI) via [WBPaper00028349] Schott S et al. (2006) | [GO:0040027] BIOLOGICAL_PROCESS negative regulation of vulval development…	WBGene00001996	172123_x_at	0.4958	0.0001	6.853	0.00042253	19.625	0.501861	0.812498	2.5851	14457.7	unc-44	B0350.2	[GO:0016328] CELLULAR_COMPONENT lateral plasma membrane (IDA) via [WBPaper00004127] Moorthy S et al. (2000) | [GO:0040018] BIOLOGICAL_PROCESS positive regulation of multicellular organism growth (IMP) | [GO:0040011] BIOLOGICAL_PROCESS locomotion (IMP) | [GO:0005515] MOLECULAR_FUNCTION protein binding (IEA) | [GO:0007165] BIOLOGICAL_PROCESS signal transduction (IEA) | [GO:0004553] MOLECULAR_FUNCTI…	WBGene00006780
172919_x_at	0.46533	0.0025	3.882	0.025192	16.671	0.400005	0.601679	2.87298	28187.9	hpl-2	K01G5.2	[GO:0008406] BIOLOGICAL_PROCESS gonad development (IMP) via [WBPaper00028349] Schott S et al. (2006) | [GO:0008406] BIOLOGICAL_PROCESS gonad development (IGI) via [WBPaper00028349] Schott S et al. (2006) | [GO:0045595] BIOLOGICAL_PROCESS regulation of cell differentiation (IGI) via [WBPaper00028349] Schott S et al. (2006) | [GO:0040027] BIOLOGICAL_PROCESS negative regulation of vulval development…	WBGene00001996	172136_x_at	0.30138	0.0045	3.1326	0.025719	2.347	0.273729	0.577547	3.37222	874.064	Y71D11A.3	Y71D11A.3
172931_x_at	0.548	0.0035	3.5521	0.03343	16.418	0.377635	0.61804	1.78508	112570	snr-4	C52E4.3	[GO:0000003] BIOLOGICAL_PROCESS reproduction (IMP) | [GO:0009792] BIOLOGICAL_PROCESS embryonic development ending in birth or egg hatching (IMP) | [GO:0002119] BIOLOGICAL_PROCESS nematode larval development (IMP) | [GO:0040007] BIOLOGICAL_PROCESS growth (IMP) | [GO:0040011] BIOLOGICAL_PROCESS locomotion (IMP) | [GO:0040027] BIOLOGICAL_PROCESS negative regulation of vulval development (IMP)	WBGene00004917	172153_x_at	0.40466	0.0005	4.0871	0.0079529	19.819	0.311726	0.760358	3.40093	14804.8	unc-44	B0350.2	[GO:0016328] CELLULAR_COMPONENT lateral plasma membrane (IDA) via [WBPaper00004127] Moorthy S et al. (2000) | [GO:0040018] BIOLOGICAL_PROCESS positive regulation of multicellular organism growth (IMP) | [GO:0040011] BIOLOGICAL_PROCESS locomotion (IMP) | [GO:0005515] MOLECULAR_FUNCTION protein binding (IEA) | [GO:0007165] BIOLOGICAL_PROCESS signal transduction (IEA) | [GO:0004553] MOLECULAR_FUNCTI…	WBGene00006780
172941_x_at	0.5691	0.0017	3.7735	0.027614	15.729	0.353553	0.792281	6.05821	32951.1	T13F2.2	T13F2.2	[GO:0003677] MOLECULAR_FUNCTION DNA binding (IEA) | [GO:0003713] MOLECULAR_FUNCTION transcription coactivator activity (IEA) | [GO:0006355] BIOLOGICAL_PROCESS regulation of transcription, DNA-dependent (IEA) | [GO:0005488] MOLECULAR_FUNCTION binding (IEA)	WBGene00011743	172177_x_at	0.4946	0	5.6183	0.0014472	21.254	0.454136	0.795821	3.19158	2979.33	Y71H2AL.1	Y71H2AL.1	[GO:0005509] MOLECULAR_FUNCTION calcium ion binding (IEA) | [GO:0040010] BIOLOGICAL_PROCESS positive regulation of growth rate (IMP) | [GO:0002119] BIOLOGICAL_PROCESS nematode larval development (IMP) | [GO:0040007] BIOLOGICAL_PROCESS growth (IMP)	WBGene00022164
172960_x_at	0.49358	0.0019	4.9305	0.011032	7.547	0.480648	0.54727	2.83706	145260	hgo-1	W06D4.1	[GO:0004411] MOLECULAR_FUNCTION homogentisate 1,2-dioxygenase activity (IEA) | [GO:0006559] BIOLOGICAL_PROCESS L-phenylalanine catabolic process (IEA) | [GO:0006570] BIOLOGICAL_PROCESS tyrosine metabolic process (IEA)	WBGene00001843	172203_x_at	0.6377	0	11.7704	7.94e-06	9.411	0.572793	0.660138	3.45281	11420.5	Y41E3.8	Y41E3.8	[GO:0016021] CELLULAR_COMPONENT integral to membrane (IEA)	WBGene00012766
173019_s_at	0.48371	0.0047	3.506	0.034814	17.117	0.330316	0.725147	3.55088	5733.51	kup-1	F10C2.2		WBGene00002241	172204_at	0.47842	0.0001	4.7962	0.0035188	7.138	0.256	0.639	2.50534	2454.41	T22H2.4	T22H2.4		WBGene00011934
173031_s_at	0.46494	0.0085	5.4433	0.0076342	22.082	0.506417	0.697528	2.23642	6545.26	Y45G5AM.9	Y45G5AM.9		WBGene00021561	172238_x_at	0.37707	0.0008	5.2008	0.0022558	2.715	0.353369	0.969376	2.05214	19.0521	K07A1.5	K07A1.5	[GO:0016021] CELLULAR_COMPONENT integral to membrane (IEA)	WBGene00010612
173056_at	0.50608	0.0002	4.3109	0.017741	5.33	0.476488	0.672797	3.75464	7128.79	T23E7.2	T23E7.2			172271_x_at	0.26527	0.011	2.6389	0.048812	10.703	0.118574	0.435694	1.80116	708767	F56H9.2	F56H9.2	[GO:0016021] CELLULAR_COMPONENT integral to membrane (IEA)	WBGene00010174
173058_s_at	0.4469	0.0169	4.5246	0.014999	20.207	0.492179	0.59767	2.08466	14900.2	R74.8	R74.8		WBGene00011282	172281_at	0.33491	0.0002	4.0106	0.0087095	13.061	0.145168	0.646032	4.93946	16.5147	F31A9.2	F31A9.2	[GO:0009792] BIOLOGICAL_PROCESS embryonic development ending in birth or egg hatching (IMP)	WBGene00017941
173088_s_at	0.30335	0.0134	3.2825	0.042516	7.993	0.34164	0.568627	2.38189	3867.75	twk-5	B0334.2	[GO:0005267] MOLECULAR_FUNCTION potassium channel activity (IEA) | [GO:0006813] BIOLOGICAL_PROCESS potassium ion transport (IEA) | [GO:0016020] CELLULAR_COMPONENT membrane (IEA) | [GO:0016021] CELLULAR_COMPONENT integral to membrane (IEA)	WBGene00006660	172290_x_at	0.2225	0.0185	3.7124	0.012475	2.824	0.239099	0.875232	2.97729	14.1164	C53B7.6	C53B7.6		WBGene00016895
173100_s_at	0.4758	0.0023	3.7148	0.029033	21.28	0.457994	0.669024	1.68902	847895	fib-1	T01C3.7	[GO:0005730] CELLULAR_COMPONENT nucleolus (IDA) via [WBPaper00006468] Saijou E et al. (2004) | [GO:0003723] MOLECULAR_FUNCTION RNA binding (IEA) | [GO:0005634] CELLULAR_COMPONENT nucleus (IEA) | [GO:0006364] BIOLOGICAL_PROCESS rRNA processing (IEA) | [GO:0040010] BIOLOGICAL_PROCESS positive regulation of growth rate (IMP) | [GO:0040019] BIOLOGICAL_PROCESS positive regulation of embryonic developm…	WBGene00001423	172294_x_at	0.28924	0.0075	3.0374	0.029051	16.807	0.298098	0.549118	3.40218	357.508	Y9D1A.2	Y9D1A.2		WBGene00021187
173138_s_at	0.54532	0.0002	7.7812	0.0017942	7.799	0.636558	0.651101	2.23504	73370.1	C53B7.3	C53B7.3		WBGene00016894	172315_x_at	0.35464	0.0024	4.9889	0.0028421	20.986	0.369896	0.768703	1.83616	124.315	E02H9.4	E02H9.4		WBGene00017102
173155_at	0.50662	0.004	9.7418	0.00066223	20.76	0.694661	0.832965	1.7961	6232.22	C31H1.8	C31H1.8	[GO:0009792] BIOLOGICAL_PROCESS embryonic development ending in birth or egg hatching (IMP)	WBGene00016291	172335_x_at	0.25132	0.0198	2.7724	0.040957	2.886	0.381524	0.593106	3.73432	1179.49	F56A4.8	F56A4.8
173161_at	0.65634	0.0004	7.8805	0.0016989	5.555	0.65747	0.826723	1.85521	1358.68	C06H5.7	C06H5.7	[GO:0016021] CELLULAR_COMPONENT integral to membrane (IEA)	WBGene00007395	172371_x_at	0.23952	0.0184	2.8332	0.037833	19.833	0.120248	0.770816	1.55209	32.5188	F44E7.3	F44E7.3		WBGene00018425
173164_s_at	0.54848	0.0021	3.8887	0.025051	5.046	0.399686	0.487656	2.27684	4261.34	C18D11.1	C18D11.1	[GO:0016021] CELLULAR_COMPONENT integral to membrane (IEA)	WBGene00007679	172389_x_at	0.33524	0.0025	4.1265	0.0075915	22.721	0.249726	0.603832	6.88252	20106.1	Y43D4A.3	Y43D4A.3	[GO:0016021] CELLULAR_COMPONENT integral to membrane (IEA)	WBGene00012789
173167_s_at	0.40039	0.0128	7.3141	0.0023351	20.892	0.60643	0.707393	2.08736	653324	gln-6	C28D4.3	[GO:0004356] MOLECULAR_FUNCTION glutamate-ammonia ligase activity (IEA) | [GO:0006542] BIOLOGICAL_PROCESS glutamine biosynthetic process (IEA) | [GO:0006807] BIOLOGICAL_PROCESS nitrogen compound metabolic process (IEA) | [GO:0003824] MOLECULAR_FUNCTION catalytic activity (IEA) | [GO:0009792] BIOLOGICAL_PROCESS embryonic development ending in birth or egg hatching (IMP)	WBGene00001607	172400_x_at	0.35545	0.002	3.6066	0.014201	5.22	0.190847	0.414973	1.81329	1.63539e+06	ilys-5	F22A3.6	[GO:0003796] MOLECULAR_FUNCTION lysozyme activity (IEA) | [GO:0009792] BIOLOGICAL_PROCESS embryonic development ending in birth or egg hatching (IMP)	WBGene00017691
173182_at	0.49462	0.0009	5.4025	0.007855	6.911	0.572316	0.746168	3.31284	215216	mlc-3	F09F7.2a			172409_x_at	0.30988	0.0019	4.1946	0.0070068	12.855	0.213969	0.681906	6.58135	394.51	ZK402.3	ZK402.3		WBGene00022730
173201_s_at	0.27156	0.0077	3.7296	0.028667	7.644	0.399068	0.467369	5.35816	805.834	bath-26	T07H3.6		WBGene00020329	172429_x_at	0.27796	0.0079	5.4533	0.0017216	22.903	0.359753	0.710909	3.1511	283.157	F52E10.4	F52E10.4		WBGene00009935
173222_s_at	0.62515	0.0015	5.5463	0.0071079	6.033	0.555265	0.643036	2.43941	92445.7	nex-1	ZC155.1	[GO:0005509] MOLECULAR_FUNCTION calcium ion binding (IEA) | [GO:0005544] MOLECULAR_FUNCTION calcium-dependent phospholipid binding (IEA) | [GO:0040010] BIOLOGICAL_PROCESS positive regulation of growth rate (IMP)	WBGene00003588	172455_x_at	0.25277	0.0107	3.8184	0.010968	22.718	0.21267	0.763486	7.14645	4215.41	F29G6.3	F29G6.3	[GO:0000003] BIOLOGICAL_PROCESS reproduction (IMP) | [GO:0040010] BIOLOGICAL_PROCESS positive regulation of growth rate (IMP) | [GO:0010171] BIOLOGICAL_PROCESS body morphogenesis (IMP)	WBGene00009259
173276_s_at	0.42674	0.0005	4.4852	0.015467	7.306	0.509464	0.739179	1.58442	420189	spp-10	C28C12.7	[GO:0005764] CELLULAR_COMPONENT lysosome (IEA) | [GO:0006665] BIOLOGICAL_PROCESS sphingolipid metabolic process (IEA)	WBGene00004995	172497_x_at	0.41676	0.0007	3.9988	0.008832	3.619	0.197617	0.668862	34.6625	270.166	R12E2.15	R12E2.15		WBGene00020040
173309_at	0.55434	0.0006	10.9794	0.00038039	20.236	0.738441	0.808539	2.2565	123150	Y51F10.2	Y51F10.2	[GO:0005515] MOLECULAR_FUNCTION protein binding (IEA) | [GO:0008270] MOLECULAR_FUNCTION zinc ion binding (IEA)	WBGene00021763	172511_x_at	0.41438	0.001	4.9432	0.0029888	0.983	0.34111	0.776409	5.00552	16453.6	Y51H4A.24	Y51H4A.24
173323_at	0.51386	0.0045	3.3785	0.038989	17.366	0.373518	0.42721	6.30938	9619.19	C35E7.1	C35E7.1		WBGene00016453	172515_x_at	0.35331	0.0025	6.0796	0.00090112	10.875	0.335419	0.402672	3.82755	19801.3	W08A12.2	W08A12.2	[GO:0016021] CELLULAR_COMPONENT integral to membrane (IEA)	WBGene00021079
173325_s_at	0.49478	0.0078	4.5426	0.014792	17.953	0.507385	0.840626	2.85639	12364.2	pcaf-1	Y47G6A.6	[GO:0008080] MOLECULAR_FUNCTION N-acetyltransferase activity (IEA) | [GO:0008152] BIOLOGICAL_PROCESS metabolic process (IEA) | [GO:0004402] MOLECULAR_FUNCTION histone acetyltransferase activity (IEA) | [GO:0005634] CELLULAR_COMPONENT nucleus (IEA) | [GO:0006355] BIOLOGICAL_PROCESS regulation of transcription, DNA-dependent (IEA)	WBGene00021636	172568_x_at	0.36744	0.0017	8.9255	6.77e-05	6.163	0.561187	0.921599	4.56207	121167	Y43F8B.2	Y43F8B.2		WBGene00012813
173330_s_at	0.46654	0.0025	4.167	0.019915	6.812	0.525476	0.769154	2.0857	782154	rpl-11.2	F07D10.1	[GO:0003735] MOLECULAR_FUNCTION structural constituent of ribosome (IEA) | [GO:0005622] CELLULAR_COMPONENT intracellular (IEA) | [GO:0005840] CELLULAR_COMPONENT ribosome (IEA) | [GO:0006412] BIOLOGICAL_PROCESS translation (IEA) | [GO:0040010] BIOLOGICAL_PROCESS positive regulation of growth rate (IMP) | [GO:0009792] BIOLOGICAL_PROCESS embryonic development ending in birth or egg hatching (IMP) | …	WBGene00004423	172610_x_at	0.54041	0	6.9126	0.0003993	18.689	0.518003	0.807148	15.1422	1051.22	ZC239.14	ZC239.14	[GO:0005515] MOLECULAR_FUNCTION protein binding (IEA)	WBGene00022572
173335_s_at	0.53682	0.0014	4.3221	0.017585	7.452	0.388671	0.740702	4.95284	135487	dod-3	C24B9.9	[GO:0016021] CELLULAR_COMPONENT integral to membrane (IEA) | [GO:0008340] BIOLOGICAL_PROCESS determination of adult life span (IMP)	WBGene00016052	172618_x_at	0.24682	0.0143	3.3964	0.01843	9.613	0.190815	0.361421	3.18221	52773.1	his-50	F07B7.9	[GO:0000786] CELLULAR_COMPONENT nucleosome (IEA) | [GO:0003677] MOLECULAR_FUNCTION DNA binding (IEA) | [GO:0005634] CELLULAR_COMPONENT nucleus (IEA) | [GO:0006334] BIOLOGICAL_PROCESS nucleosome assembly (IEA) | [GO:0040010] BIOLOGICAL_PROCESS positive regulation of growth rate (IMP) | [GO:0009792] BIOLOGICAL_PROCESS embryonic development ending in birth or egg hatching (IMP) | [GO:0040011] BIOLOG…	WBGene00001924
173350_s_at	0.36797	0.0029	4.216	0.019143	7.914	0.416503	0.482866	2.77208	19114.2	C54E4.2	C54E4.2	[GO:0005509] MOLECULAR_FUNCTION calcium ion binding (IEA)	WBGene00016918	172627_x_at	0.31618	0.0029	2.8777	0.035707	2.976	0.223889	0.494895	4.79664	1181.35	Y105C5A.12	Y105C5A.12		WBGene00013636
173362_s_at	0.49409	0.0072	6.4218	0.0039949	18.624	0.615284	0.751135	2.9288	820.929	M03C11.2	M03C11.2	[GO:0004003] MOLECULAR_FUNCTION ATP-dependent DNA helicase activity (IEA) | [GO:0005634] CELLULAR_COMPONENT nucleus (IEA) | [GO:0016818] MOLECULAR_FUNCTION hydrolase activity, acting on acid anhydrides, in phosphorus-containing anhydrides (IEA) | [GO:0003676] MOLECULAR_FUNCTION nucleic acid binding (IEA) | [GO:0005524] MOLECULAR_FUNCTION ATP binding (IEA) | [GO:0006139] BIOLOGICAL_PROCESS nucleob…	WBGene00010839	172628_x_at	0.21066	0.0044	3.1988	0.02364	4.04	0.235255	0.381246	3.81301	70.8702	Y38E10A.16	Y38E10A.16	[GO:0016021] CELLULAR_COMPONENT integral to membrane (IEA)	WBGene00012594
173378_at	0.37545	0.0103	3.5609	0.033174	21.279	0.303828	0.761647	2.20205	3775.81	Y37E3.1	Y37E3.1	[GO:0005488] MOLECULAR_FUNCTION binding (IEA)	WBGene00021346	172633_x_at	0.28768	0.008	2.7883	0.040114	15.675	0.276882	0.597225	4.20445	2508.44	Y55H10B.1	Y55H10B.1
173400_s_at	0.49929	0.0036	4.9069	0.011226	20.443	0.490803	0.649347	3.51764	127.211	unc-71	Y37D8A.13	[GO:0045026] BIOLOGICAL_PROCESS plasma membrane fusion (TAS) via [WBPaper00002626] Podbilewicz B (1996) | [GO:0016337] BIOLOGICAL_PROCESS cell-cell adhesion (TAS) via [WBPaper00002626] Podbilewicz B (1996) | [GO:0006508] BIOLOGICAL_PROCESS proteolysis (ISS) via [WBPaper00002626] Podbilewicz B (1996) | [GO:0006508] BIOLOGICAL_PROCESS proteolysis (IEA) | [GO:0016020] CELLULAR_COMPONENT membrane (ID…	WBGene00006804	172635_x_at	0.1574	0.0075	3.3445	0.019669	4.918	0.200789	0.723671	7.75815	52.8974	Y38E10A.15	Y38E10A.15	[GO:0016021] CELLULAR_COMPONENT integral to membrane (IEA)	WBGene00012593
173412_s_at	0.43628	0.0001	8.64	0.0011364	9.689	0.62946	0.897262	2.84857	116597	ttr-24	Y51A2D.9		WBGene00013077	172643_s_at	0.25491	0.0124	2.9923	0.030785	18.567	0.132906	0.672265	2.22963	26.7067	Y55F3AM.3	Y55F3AM.3	[GO:0003676] MOLECULAR_FUNCTION nucleic acid binding (IEA) | [GO:0003723] MOLECULAR_FUNCTION RNA binding (IEA) | [GO:0005634] CELLULAR_COMPONENT nucleus (IEA) | [GO:0006397] BIOLOGICAL_PROCESS mRNA processing (IEA) | [GO:0000166] MOLECULAR_FUNCTION nucleotide binding (IEA) | [GO:0040010] BIOLOGICAL_PROCESS positive regulation of growth rate (IMP) | [GO:0002009] BIOLOGICAL_PROCESS morphogenesis of…	WBGene00021921
173438_at	0.50194	0.0028	3.8133	0.026695	5.557	0.39713	0.536059	3.8097	16249.9	C23H4.1	C23H4.1			172647_x_at	0.31453	0.0059	3.2439	0.022328	14.501	0.1949	0.86819	2.07369	175978	his-17	K06C4.5	[GO:0000786] CELLULAR_COMPONENT nucleosome (IEA) | [GO:0003677] MOLECULAR_FUNCTION DNA binding (IEA) | [GO:0005634] CELLULAR_COMPONENT nucleus (IEA) | [GO:0006334] BIOLOGICAL_PROCESS nucleosome assembly (IEA) | [GO:0040010] BIOLOGICAL_PROCESS positive regulation of growth rate (IMP) | [GO:0009792] BIOLOGICAL_PROCESS embryonic development ending in birth or egg hatching (IMP) | [GO:0002119] BIOLOG…	WBGene00001891
173442_at	0.4171	0.0097	3.2313	0.044542	6.332	0.299998	0.570823	3.46145	18594.8	hum-5	T02C12.1	[GO:0003774] MOLECULAR_FUNCTION motor activity (IEA) | [GO:0005524] MOLECULAR_FUNCTION ATP binding (IEA) | [GO:0016459] CELLULAR_COMPONENT myosin complex (IEA)	WBGene00002038	172650_x_at	0.28866	0.0045	4.0601	0.008212	10.491	0.222881	0.618271	4.57701	23122.9	his-18	K06C4.10	[GO:0000786] CELLULAR_COMPONENT nucleosome (IEA) | [GO:0003677] MOLECULAR_FUNCTION DNA binding (IEA) | [GO:0005634] CELLULAR_COMPONENT nucleus (IEA) | [GO:0006334] BIOLOGICAL_PROCESS nucleosome assembly (IEA) | [GO:0040010] BIOLOGICAL_PROCESS positive regulation of growth rate (IMP) | [GO:0009792] BIOLOGICAL_PROCESS embryonic development ending in birth or egg hatching (IMP) | [GO:0040011] BIOLOG…	WBGene00001892
173452_s_at	0.40338	0.0134	3.2873	0.042331	16.954	0.304431	0.686881	4.67703	5301.72	rde-1	K08H10.7	[GO:0016246] BIOLOGICAL_PROCESS RNA interference (IMP) via [WBPaper00004920] Parrish S et al. (2001) | [GO:0005515] MOLECULAR_FUNCTION protein binding (IPI) via [WBPaper00005368] Tabara H et al. (2002) | [GO:0006952] BIOLOGICAL_PROCESS defense response (IMP)	WBGene00004323	172671_x_at	0.32661	0.0001	4.7578	0.0036733	10.201	0.25169	0.495846	5.79043	64441.5	his-38	K03A1.6	[GO:0000786] CELLULAR_COMPONENT nucleosome (IEA) | [GO:0003677] MOLECULAR_FUNCTION DNA binding (IEA) | [GO:0005634] CELLULAR_COMPONENT nucleus (IEA) | [GO:0006334] BIOLOGICAL_PROCESS nucleosome assembly (IEA) | [GO:0040010] BIOLOGICAL_PROCESS positive regulation of growth rate (IMP) | [GO:0009792] BIOLOGICAL_PROCESS embryonic development ending in birth or egg hatching (IMP) | [GO:0040011] BIOLOG…	WBGene00001912
173467_s_at	0.70434	0.0003	13.2245	0.00015587	17.918	0.758751	0.900112	1.75631	15108.3	sqv-3	R10E11.4	[GO:0002009] BIOLOGICAL_PROCESS morphogenesis of an epithelium (IMP) via [WBPaper00003405] Herman T et al. (1999) | [GO:0040025] BIOLOGICAL_PROCESS vulval development (IMP) via [WBPaper00003405] Herman T et al. (1999) | [GO:0022604] BIOLOGICAL_PROCESS regulation of cell morphogenesis (IMP) via [WBPaper00003405] Herman T et al. (1999) | [GO:0018991] BIOLOGICAL_PROCESS oviposition (IMP) via [WBPape…	WBGene00005021	172699_x_at	0.29955	0.0076	3.1825	0.024136	19.056	0.195732	0.698887	4.1575	12154.1	cin-4	ZK1127.7	[GO:0003677] MOLECULAR_FUNCTION DNA binding (IEA) | [GO:0003918] MOLECULAR_FUNCTION DNA topoisomerase (ATP-hydrolyzing) activity (IEA) | [GO:0005524] MOLECULAR_FUNCTION ATP binding (IEA) | [GO:0005694] CELLULAR_COMPONENT chromosome (IEA) | [GO:0006265] BIOLOGICAL_PROCESS DNA topological change (IEA) | [GO:0006259] BIOLOGICAL_PROCESS DNA metabolic process (IEA) | [GO:0009792] BIOLOGICAL_PROCESS em…	WBGene00022854
173488_at	0.54241	0.0004	4.1689	0.019884	16.592	0.391179	0.667862	13.0168	7767.45	T05E7.5	T05E7.5		WBGene00020261	172706_x_at	0.38153	0.0012	4.2581	0.0065053	3.171	0.392883	0.830825	22.896	15286.1	F53F1.4	F53F1.4		WBGene00009982
173514_s_at	0.45238	0.0067	3.4806	0.035603	6.221	0.412941	0.559584	2.24109	34234.1	K12C11.1	K12C11.1	[GO:0006508] BIOLOGICAL_PROCESS proteolysis (IEA) | [GO:0008235] MOLECULAR_FUNCTION metalloexopeptidase activity (IEA)	WBGene00019673	172731_x_at	0.30214	0.0065	3.1435	0.025363	2.007	0.090376	0.269869	3.49433	532.859	T27E7.7	T27E7.7
173561_s_at	0.44515	0.0141	5.8619	0.0057391	6.665	0.550167	0.650771	4.32947	34100.3	R12C12.9	R12C12.9	[GO:0016021] CELLULAR_COMPONENT integral to membrane (IEA)	WBGene00020029	172733_x_at	0.30515	0.0024	4.5267	0.0047706	10.263	0.231934	0.506206	3.45775	72919.4	his-5	F45F2.3	[GO:0000786] CELLULAR_COMPONENT nucleosome (IEA) | [GO:0003677] MOLECULAR_FUNCTION DNA binding (IEA) | [GO:0005634] CELLULAR_COMPONENT nucleus (IEA) | [GO:0006334] BIOLOGICAL_PROCESS nucleosome assembly (IEA) | [GO:0040010] BIOLOGICAL_PROCESS positive regulation of growth rate (IMP) | [GO:0009792] BIOLOGICAL_PROCESS embryonic development ending in birth or egg hatching (IMP) | [GO:0040011] BIOLOG…	WBGene00001879
173564_at	0.44836	0.0018	3.9977	0.022875	18.148	0.411799	0.492326	2.04447	55069.7	Y37D8A.4	Y37D8A.4	[GO:0005515] MOLECULAR_FUNCTION protein binding (IEA)	WBGene00012546	172735_x_at	0.29967	0.0037	2.7053	0.044725	1.383	0.115551	0.383086	3.02362	116661	col-168	T10E10.1	[GO:0016021] CELLULAR_COMPONENT integral to membrane (IEA) | [GO:0040010] BIOLOGICAL_PROCESS positive regulation of growth rate (IMP) | [GO:0010171] BIOLOGICAL_PROCESS body morphogenesis (IMP) | [GO:0040011] BIOLOGICAL_PROCESS locomotion (IMP)	WBGene00000741
173574_at	0.43002	0.0101	7.6354	0.0019457	18.783	0.637233	0.766921	2.56575	4168.73	T10F2.3	T10F2.3			172742_x_at	0.27721	0.0048	6.0185	0.00095854	4.325	0.526784	0.952567	2.14952	53428.9	nrf-6	C08B11.4	[GO:0016747] MOLECULAR_FUNCTION transferase activity, transferring groups other than amino-acyl groups (IEA) | [GO:0016021] CELLULAR_COMPONENT integral to membrane (IEA) | [GO:0009792] BIOLOGICAL_PROCESS embryonic development ending in birth or egg hatching (IMP) | [GO:0010171] BIOLOGICAL_PROCESS body morphogenesis (IMP) | [GO:0040017] BIOLOGICAL_PROCESS positive regulation of locomotion (IMP)	WBGene00003813
173604_at	0.49617	0.0085	4.0932	0.021148	17.281	0.370439	0.740963	1.9235	2412.47	C14A11.9	C14A11.9		WBGene00050944	172744_at	0.31407	0.0048	4.2954	0.0062287	12.066	0.18303	0.684653	135.855	2736.27	mtl-1	K11G9.6	[GO:0046686] BIOLOGICAL_PROCESS response to cadmium ion (IEP) via [WBPaper00001688] Freedman JH et al. (1993) | [GO:0009408] BIOLOGICAL_PROCESS response to heat (IEP) via [WBPaper00001688] Freedman JH et al. (1993) | [GO:0046872] MOLECULAR_FUNCTION metal ion binding (IEA) | [GO:0005509] MOLECULAR_FUNCTION calcium ion binding (IEA) | [GO:0008340] BIOLOGICAL_PROCESS determination of adult life span…	WBGene00003473
173642_at	0.43316	0.0042	3.9898	0.023027	5.375	0.421082	0.481207	2.19149	27.4493	Y22D7AR.6	Y22D7AR.6	[GO:0008440] MOLECULAR_FUNCTION inositol trisphosphate 3-kinase activity (IEA)	WBGene00021260	172761_x_at	0.28962	0.0065	2.7471	0.042338	9.759	0.156157	0.593159	2.75699	54670.8	his-1	T10C6.14	[GO:0000786] CELLULAR_COMPONENT nucleosome (IEA) | [GO:0003677] MOLECULAR_FUNCTION DNA binding (IEA) | [GO:0005634] CELLULAR_COMPONENT nucleus (IEA) | [GO:0006334] BIOLOGICAL_PROCESS nucleosome assembly (IEA) | [GO:0040010] BIOLOGICAL_PROCESS positive regulation of growth rate (IMP) | [GO:0009792] BIOLOGICAL_PROCESS embryonic development ending in birth or egg hatching (IMP) | [GO:0040011] BIOLOG…	WBGene00001875
173644_at	0.46799	0.0055	3.58	0.032626	5.985	0.39877	0.513582	4.15334	40017.2	K02D7.1	K02D7.1	[GO:0003824] MOLECULAR_FUNCTION catalytic activity (IEA) | [GO:0009116] BIOLOGICAL_PROCESS nucleoside metabolic process (IEA) | [GO:0016763] MOLECULAR_FUNCTION transferase activity, transferring pentosyl groups (IEA) | [GO:0004731] MOLECULAR_FUNCTION purine-nucleoside phosphorylase activity (IEA) | [GO:0006139] BIOLOGICAL_PROCESS nucleobase, nucleoside, nucleotide and nucleic acid metabolic proce…	WBGene00019298	172766_x_at	0.31158	0.0078	3.1763	0.024326	3.015	0.144338	0.311976	3.18494	694.075	ZK563.3	ZK563.3
173683_s_at	0.47909	0.0078	4.7574	0.012553	16.437	0.493238	0.587768	2.36883	30182.1	F09G2.8	F09G2.8	[GO:0003824] MOLECULAR_FUNCTION catalytic activity (IEA) | [GO:0008152] BIOLOGICAL_PROCESS metabolic process (IEA) | [GO:0016021] CELLULAR_COMPONENT integral to membrane (IEA)	WBGene00017316	172769_x_at	0.34625	0.0032	2.9227	0.03368	21.961	0.216667	0.708691	1.76102	120.881	cyp-33C4	F44C8.1	[GO:0004497] MOLECULAR_FUNCTION monooxygenase activity (IEA) | [GO:0005506] MOLECULAR_FUNCTION iron ion binding (IEA) | [GO:0009055] MOLECULAR_FUNCTION electron carrier activity (IEA) | [GO:0020037] MOLECULAR_FUNCTION heme binding (IEA)	WBGene00018413
173701_s_at	0.34514	0.0074	5.1507	0.0093938	15.853	0.53222	0.675773	1.89662	211.153	T03D3.5	T03D3.5		WBGene00020183	172773_x_at	0.43009	0.0001	3.9975	0.0088457	22.247	0.377947	0.692856	5.58222	125.056	---	---
173709_at	0.4545	0.0082	5.921	0.0055184	16.767	0.5508	0.764308	1.70463	22794.7	C02B10.2	C02B10.2			172793_x_at	0.31646	0.0005	6.0179	0.00095913	19.491	0.463325	0.803329	7.77604	33969.4	cpr-3	T10H4.12	[GO:0004197] MOLECULAR_FUNCTION cysteine-type endopeptidase activity (IEA) | [GO:0006508] BIOLOGICAL_PROCESS proteolysis (IEA) | [GO:0008234] MOLECULAR_FUNCTION cysteine-type peptidase activity (IEA) | [GO:0009792] BIOLOGICAL_PROCESS embryonic development ending in birth or egg hatching (IMP)	WBGene00000783
173712_s_at	0.57013	0.0018	4.5806	0.014364	17.098	0.414323	0.749573	11.429	24167.1	dnj-22	T23B12.7	[GO:0031072] MOLECULAR_FUNCTION heat shock protein binding (IEA) | [GO:0040010] BIOLOGICAL_PROCESS positive regulation of growth rate (IMP) | [GO:0040019] BIOLOGICAL_PROCESS positive regulation of embryonic development (IMP) | [GO:0002119] BIOLOGICAL_PROCESS nematode larval development (IMP) | [GO:0040007] BIOLOGICAL_PROCESS growth (IMP) | [GO:0000003] BIOLOGICAL_PROCESS reproduction (IMP) | [GO:…	WBGene00001040	172797_x_at	0.30396	0.0067	3.8881	0.010084	2.648	0.29421	0.733183	3.96516	607.514	C54H2.2	C54H2.2
173719_s_at	0.48317	0.0085	3.9408	0.023983	19.741	0.398138	0.530765	2.29369	13914.6	Y49F6B.9	Y49F6B.9	[GO:0005515] MOLECULAR_FUNCTION protein binding (IEA) | [GO:0008270] MOLECULAR_FUNCTION zinc ion binding (IEA) | [GO:0016021] CELLULAR_COMPONENT integral to membrane (IEA)	WBGene00021721	172799_x_at	0.31227	0.0046	2.8201	0.038486	3.86	0.173732	0.617478	10.0241	10112.6	F53F1.5	F53F1.5		WBGene00009983
173768_at	0.33907	0.0196	3.8263	0.026403	4.288	0.478879	0.65043	2.87864	1765.93	K08F8.3	K08F8.3			172823_x_at	0.33792	0.0055	5.9924	0.00098425	7.629	0.385887	0.725022	2.04685	105595	his-57	F54E12.5	[GO:0000786] CELLULAR_COMPONENT nucleosome (IEA) | [GO:0003677] MOLECULAR_FUNCTION DNA binding (IEA) | [GO:0005634] CELLULAR_COMPONENT nucleus (IEA) | [GO:0006334] BIOLOGICAL_PROCESS nucleosome assembly (IEA) | [GO:0009792] BIOLOGICAL_PROCESS embryonic development ending in birth or egg hatching (IMP) | [GO:0006997] BIOLOGICAL_PROCESS nuclear organization and biogenesis (IMP) | [GO:0000003] BIOLO…	WBGene00001931
173784_at	0.45136	0.0045	3.5976	0.032129	19.222	0.371254	0.647176	3.16701	13589	C50E3.11	C50E3.11			172837_x_at	0.27946	0.0041	2.8327	0.037859	1.712	0.0848546	0.754679	2.25748	14.5497	C24A3.7	C24A3.7
173790_at	0.43956	0.0024	3.793	0.02716	6.012	0.383078	0.475543	3.30183	13631.8	emb-9	K04H4.1	[GO:0030198] BIOLOGICAL_PROCESS extracellular matrix organization and biogenesis (IMP) via [WBPaper00002814] Gupta MC et al. (1997) Journal of Cell Biology "Characterization of alpha-1(IV) | [GO:0009790] BIOLOGICAL_PROCESS embryonic development (IMP) via [WBPaper00002814] Gupta MC et al. (1997) Journal of Cell Biology "Characterization of alpha-1(IV) | [GO:0002119] BIOLOGICAL_PROCESS nematode lar…	WBGene00001263	172844_x_at	0.35841	0.0015	4.0764	0.0080547	23.639	0.286867	0.539125	3.1146	72385.9	fipr-21	F41E7.5		WBGene00009621
173804_s_at	0.33863	0.0121	5.3386	0.0082158	20.24	0.503685	0.647527	2.37073	421811	T25E12.5	T25E12.5	[GO:0016757] MOLECULAR_FUNCTION transferase activity, transferring glycosyl groups (IEA)	WBGene00012020	172867_x_at	0.2597	0.0162	3.5433	0.015354	14.45	0.103	0.794971	2.1974	46614.7	his-6	F45F2.13	[GO:0000786] CELLULAR_COMPONENT nucleosome (IEA) | [GO:0003677] MOLECULAR_FUNCTION DNA binding (IEA) | [GO:0005634] CELLULAR_COMPONENT nucleus (IEA) | [GO:0006334] BIOLOGICAL_PROCESS nucleosome assembly (IEA) | [GO:0040010] BIOLOGICAL_PROCESS positive regulation of growth rate (IMP) | [GO:0009792] BIOLOGICAL_PROCESS embryonic development ending in birth or egg hatching (IMP) | [GO:0002119] BIOLOG…	WBGene00001880
173845_at	0.45985	0.007	7.1242	0.0026077	17.143	0.60366	0.707624	1.64442	12007.7	dnj-23	T24H10.3	[GO:0031072] MOLECULAR_FUNCTION heat shock protein binding (IEA) | [GO:0040011] BIOLOGICAL_PROCESS locomotion (IMP)	WBGene00001041	172894_x_at	0.47941	0	5.3843	0.0018527	8.586	0.328617	0.887114	59.6143	674.842	lbp-8	T22G5.6	[GO:0006869] BIOLOGICAL_PROCESS lipid transport (TAS) via [WBPaper00003911] Plenefisch JD et al. (2000) | [GO:0008289] MOLECULAR_FUNCTION lipid binding (TAS) via [WBPaper00003911] Plenefisch JD et al. (2000) | [GO:0008289] MOLECULAR_FUNCTION lipid binding (IEA) | [GO:0005215] MOLECULAR_FUNCTION transporter activity (IEA) | [GO:0006810] BIOLOGICAL_PROCESS transport (IEA) | [GO:0005488] MOLECULAR_F…	WBGene00002260
173914_s_at	0.5683	0.0011	6.2245	0.004528	17.324	0.584222	0.626293	3.25109	26800.2	F21D5.2	F21D5.2		WBGene00009007	172901_x_at	0.56855	0	6.5897	0.00054408	8.797	0.36102	0.746697	20.0209	147581	hsp-16.49	T27E4.9	[GO:0030968] BIOLOGICAL_PROCESS endoplasmic reticulum unfolded protein response (IEP) via [WBPaper00005432] Urano F et al. (2002) | [GO:0008340] BIOLOGICAL_PROCESS determination of adult life span (IMP)	WBGene00002020
173943_s_at	0.51611	0.0053	4.9462	0.010904	17.899	0.495338	0.691626	3.48394	15495.9	cdc-25.3	ZK637.11	[GO:0007049] BIOLOGICAL_PROCESS cell cycle (ISS) via [WBPaper00003164] Ashcroft NR et al. (1998) | [GO:0005575] CELLULAR_COMPONENT cellular_component (ND) via [WBPaper00003164] Ashcroft NR et al. (1998) | [GO:0008138] MOLECULAR_FUNCTION protein tyrosine/serine/threonine phosphatase activity (ISS) via [WBPaper00003164] Ashcroft NR et al. (1998) | [GO:0000087] BIOLOGICAL_PROCESS M phase of mitotic …	WBGene00000388	172914_x_at	0.22659	0.0134	2.7266	0.043491	0.506	0.0903382	0.414767	1.50607	74.0396	plc-1	F31B12.1	[GO:0007165] BIOLOGICAL_PROCESS signal transduction (IEA) | [GO:0004629] MOLECULAR_FUNCTION phospholipase C activity (IEA) | [GO:0006629] BIOLOGICAL_PROCESS lipid metabolic process (IEA) | [GO:0007242] BIOLOGICAL_PROCESS intracellular signaling cascade (IEA) | [GO:0004435] MOLECULAR_FUNCTION phosphoinositide phospholipase C activity (IEA) | [GO:0005085] MOLECULAR_FUNCTION guanyl-nucleotide exchan…	WBGene00004036
173998_s_at	0.30334	0.0113	4.6002	0.014149	6.012	0.43805	0.614408	1.79103	4568.47	F49E2.1	F49E2.1	[GO:0003824] MOLECULAR_FUNCTION catalytic activity (IEA) | [GO:0046872] MOLECULAR_FUNCTION metal ion binding (IEA) | [GO:0051539] MOLECULAR_FUNCTION 4 iron, 4 sulfur cluster binding (IEA) | [GO:0006777] BIOLOGICAL_PROCESS Mo-molybdopterin cofactor biosynthetic process (IEA) | [GO:0051536] MOLECULAR_FUNCTION iron-sulfur cluster binding (IEA) | [GO:0008152] BIOLOGICAL_PROCESS metabolic process (IEA…	WBGene00009885	172960_x_at	0.3878	0.0012	4.5192	0.004812	20.606	0.282064	0.743131	1.90927	88698	hgo-1	W06D4.1	[GO:0004411] MOLECULAR_FUNCTION homogentisate 1,2-dioxygenase activity (IEA) | [GO:0006559] BIOLOGICAL_PROCESS L-phenylalanine catabolic process (IEA) | [GO:0006570] BIOLOGICAL_PROCESS tyrosine metabolic process (IEA)	WBGene00001843
174018_at	0.46665	0.0082	3.8937	0.024946	5.528	0.304922	0.912555	1.68574	5541.35	nhr-34	F58G6.5	[GO:0003677] MOLECULAR_FUNCTION DNA binding (IEA) | [GO:0004879] MOLECULAR_FUNCTION ligand-dependent nuclear receptor activity (IEA) | [GO:0005634] CELLULAR_COMPONENT nucleus (IEA) | [GO:0006355] BIOLOGICAL_PROCESS regulation of transcription, DNA-dependent (IEA) | [GO:0003700] MOLECULAR_FUNCTION transcription factor activity (IEA) | [GO:0003707] MOLECULAR_FUNCTION steroid hormone receptor activi…	WBGene00003627	172984_s_at	0.55082	0	10.8761	1.5e-05	19.872	0.684014	0.843536	4.06981	6887.04	kel-8	W02G9.2	[GO:0043005] CELLULAR_COMPONENT neuron projection (IDA) via [WBPaper00027017] Schaefer H et al. (2006) | [GO:0043025] CELLULAR_COMPONENT cell soma (IDA) via [WBPaper00027017] Schaefer H et al. (2006) | [GO:0014069] CELLULAR_COMPONENT postsynaptic density (IDA) via [WBPaper00027017] Schaefer H et al. (2006) | [GO:0005515] MOLECULAR_FUNCTION protein binding (IEA)	WBGene00020952
174024_at	0.4371	0.0007	7.3713	0.0022595	17.365	0.6668	0.905873	2.26746	71433.5	top-1	M01E5.5			172987_s_at	0.36141	0.0019	2.831	0.037941	15.661	0.198322	0.601803	2.59155	522.888	Y22D7AL.7	Y22D7AL.7		WBGene00021246
174049_s_at	0.4756	0.0095	6.0633	0.0050257	18.059	0.577602	0.706925	2.33438	1220.92	tag-143	ZK856.9		WBGene00006489	172989_s_at	0.25695	0.0138	2.7058	0.044696	6.248	0.176176	0.747206	4.04872	36.1124	R11A5.7	R11A5.7	[GO:0004181] MOLECULAR_FUNCTION metallocarboxypeptidase activity (IEA) | [GO:0006508] BIOLOGICAL_PROCESS proteolysis (IEA) | [GO:0008270] MOLECULAR_FUNCTION zinc ion binding (IEA) | [GO:0004180] MOLECULAR_FUNCTION carboxypeptidase activity (IEA) | [GO:0010171] BIOLOGICAL_PROCESS body morphogenesis (IMP)	WBGene00011235
174056_at	0.67172	0.0002	7.8456	0.0017317	5.931	0.620525	0.786403	3.72358	8483.75	F54D1.6	F54D1.6			172996_s_at	0.35894	0.0027	2.8515	0.036943	19.188	0.227009	0.740893	2.53259	4031.3	E01B7.1	E01B7.1	[GO:0004221] MOLECULAR_FUNCTION ubiquitin thiolesterase activity (IEA) | [GO:0006511] BIOLOGICAL_PROCESS ubiquitin-dependent protein catabolic process (IEA) | [GO:0040010] BIOLOGICAL_PROCESS positive regulation of growth rate (IMP) | [GO:0040018] BIOLOGICAL_PROCESS positive regulation of multicellular organism growth (IMP) | [GO:0040011] BIOLOGICAL_PROCESS locomotion (IMP) | [GO:0002119] BIOLOGIC…	WBGene00008441
174069_at	0.3886	0.0166	3.7437	0.028324	7.929	0.343517	0.813654	6.37794	4211.46	tag-234	F55C12.7	[GO:0016021] CELLULAR_COMPONENT integral to membrane (IEA)	WBGene00018874	173008_s_at	0.50099	0.0001	5.153	0.0023757	21.659	0.534341	0.652217	14.3172	501.861	---	---
174129_at	0.32117	0.0104	3.2184	0.045075	23.116	0.331267	0.575024	2.16876	18625.4	F27D4.2	F27D4.2			173014_at	0.29212	0.0026	3.3826	0.018751	16.964	0.255581	0.688772	3.90581	5068.71	nep-1	ZK20.6	[GO:0004222] MOLECULAR_FUNCTION metalloendopeptidase activity (IEA) | [GO:0006508] BIOLOGICAL_PROCESS proteolysis (IEA) | [GO:0016020] CELLULAR_COMPONENT membrane (IEA) | [GO:0008237] MOLECULAR_FUNCTION metallopeptidase activity (IEA) | [GO:0016021] CELLULAR_COMPONENT integral to membrane (IEA) | [GO:0000003] BIOLOGICAL_PROCESS reproduction (IMP)	WBGene00013926
174148_at	0.5721	0.0014	3.9592	0.023618	15.848	0.396586	0.711941	6.84766	11306.4	C27H6.9	C27H6.9	[GO:0000003] BIOLOGICAL_PROCESS reproduction (IMP)	WBGene00077500	173015_s_at	0.46561	0	9.9241	3.06e-05	0.773	0.563938	0.866265	5.55316	1197.88	clec-81	Y54G2A.9	[GO:0005488] MOLECULAR_FUNCTION binding (IEA)	WBGene00021874
174149_at	0.59315	0.0018	5.4576	0.0075582	19.44	0.522703	0.616111	3.05611	7287.9	F22E5.17	F22E5.17		WBGene00017712	173023_at	0.31992	0.001	2.7543	0.04194	10.643	0.209197	0.454982	2.73303	151.1	Y54F10BM.9	Y54F10BM.9		WBGene00021863
174154_at	0.54183	0.0015	7.8785	0.0017008	20.51	0.634247	0.784925	1.98088	159457	spas-1	C24B5.2	[GO:0048477] BIOLOGICAL_PROCESS oogenesis (IMP) via [WBPaper00029440] Matsushita-Ishiodori Y et al. (2007) | [GO:0040025] BIOLOGICAL_PROCESS vulval development (IMP) via [WBPaper00029440] Matsushita-Ishiodori Y et al. (2007) | [GO:0007019] BIOLOGICAL_PROCESS microtubule depolymerization (IDA) via [WBPaper00029440] Matsushita-Ishiodori Y et al. (2007) | [GO:0048471] CELLULAR_COMPONENT perinuclear …	WBGene00016045	173025_s_at	0.29136	0.0095	2.709	0.044506	10.414	0.0194678	0.206224	2.65366	301.345	Y61A9LA.3	Y61A9LA.3		WBGene00022015
174155_s_at	0.42926	0.0133	8.6407	0.001136	20.321	0.704016	0.861447	1.83403	28249.4	spas-1	C24B5.2	[GO:0048477] BIOLOGICAL_PROCESS oogenesis (IMP) via [WBPaper00029440] Matsushita-Ishiodori Y et al. (2007) | [GO:0040025] BIOLOGICAL_PROCESS vulval development (IMP) via [WBPaper00029440] Matsushita-Ishiodori Y et al. (2007) | [GO:0007019] BIOLOGICAL_PROCESS microtubule depolymerization (IDA) via [WBPaper00029440] Matsushita-Ishiodori Y et al. (2007) | [GO:0048471] CELLULAR_COMPONENT perinuclear …	WBGene00016045	173026_at	0.51923	0.0001	8.7563	7.78e-05	0.452	0.488257	0.683361	5.95776	433.965	F46G11.4	F46G11.4	[GO:0016021] CELLULAR_COMPONENT integral to membrane (IEA)	WBGene00018517
174170_at	0.38711	0.0139	4.8666	0.011567	20.834	0.466353	0.649419	2.0769	3406.44	C05D11.7	C05D11.7			173036_s_at	0.24806	0.0189	2.6542	0.047834	1.047	0.230845	0.560593	1.52155	1.12196e+06	asp-6	F21F8.7	[GO:0004190] MOLECULAR_FUNCTION aspartic-type endopeptidase activity (IEA) | [GO:0006508] BIOLOGICAL_PROCESS proteolysis (IEA) | [GO:0008219] BIOLOGICAL_PROCESS cell death (IMP)	WBGene00000219
174177_at	0.42638	0.0108	3.8948	0.024923	7.127	0.430902	0.550694	2.05827	1972.98	C02F5.7	C02F5.7			173051_s_at	0.33222	0.0016	3.7398	0.012066	5.039	0.223201	0.375134	1.84805	925167	ilys-5	F22A3.6	[GO:0003796] MOLECULAR_FUNCTION lysozyme activity (IEA) | [GO:0009792] BIOLOGICAL_PROCESS embryonic development ending in birth or egg hatching (IMP)	WBGene00017691
174217_at	0.44463	0.0021	5.686	0.00646	20.836	0.508699	0.832329	3.49099	289.599	F31A3.5	F31A3.5			173055_s_at	0.47506	0.0007	4.6354	0.0042164	9.986	0.387448	0.851014	1.84895	585190	daf-21	C47E8.5	[GO:0040024] BIOLOGICAL_PROCESS dauer larval development (IMP) via [WBPaper00004963] Murakami M et al. (2001) | [GO:0040024] BIOLOGICAL_PROCESS dauer larval development (IGI) via [WBPaper00004963] Murakami M et al. (2001) | [GO:0008340] BIOLOGICAL_PROCESS determination of adult life span (IGI) via [WBPaper00006377] Morley JF et al. (2004) | [GO:0002119] BIOLOGICAL_PROCESS nematode larval developm…	WBGene00000915
174233_at	0.46935	0.001	3.385	0.038764	18.109	0.356277	0.484731	3.43981	609.239	T23C6.4	T23C6.4		WBGene00020726	173083_s_at	0.23563	0.0162	2.7362	0.042949	2.302	0.0607836	0.366771	26.3209	63.7011	H10E21.4	H10E21.4	[GO:0005509] MOLECULAR_FUNCTION calcium ion binding (IEA)	WBGene00019184
174270_s_at	0.58116	0.0018	4.0533	0.021852	16.438	0.398937	0.622294	2.45799	32755	nfyc-1	F23F1.1	[GO:0005622] CELLULAR_COMPONENT intracellular (IEA) | [GO:0043565] MOLECULAR_FUNCTION sequence-specific DNA binding (IEA) | [GO:0003677] MOLECULAR_FUNCTION DNA binding (IEA) | [GO:0002119] BIOLOGICAL_PROCESS nematode larval development (IMP) | [GO:0040007] BIOLOGICAL_PROCESS growth (IMP) | [GO:0040035] BIOLOGICAL_PROCESS hermaphrodite genitalia development (IMP) | [GO:0000003] BIOLOGICAL_PROCESS …	WBGene00017742	173107_at	0.3325	0	4.7877	0.0035524	23.134	0.435259	0.830199	4.06276	4076.68	---	---
174332_s_at	0.57876	0.001	4.285	0.018112	16.768	0.397271	0.751622	4.14544	6328.59	C16C10.2	C16C10.2	[GO:0006364] BIOLOGICAL_PROCESS rRNA processing (IEA) | [GO:0032040] CELLULAR_COMPONENT small-subunit processome (IEA) | [GO:0040010] BIOLOGICAL_PROCESS positive regulation of growth rate (IMP) | [GO:0002119] BIOLOGICAL_PROCESS nematode larval development (IMP) | [GO:0040007] BIOLOGICAL_PROCESS growth (IMP)	WBGene00007623	173116_s_at	0.28951	0.0051	2.9134	0.03409	13.968	0.0463024	0.337159	3.73473	1108.71	ztf-11	F52F12.6	[GO:0003700] MOLECULAR_FUNCTION transcription factor activity (IEA) | [GO:0005634] CELLULAR_COMPONENT nucleus (IEA) | [GO:0006355] BIOLOGICAL_PROCESS regulation of transcription, DNA-dependent (IEA) | [GO:0008270] MOLECULAR_FUNCTION zinc ion binding (IEA) | [GO:0009792] BIOLOGICAL_PROCESS embryonic development ending in birth or egg hatching (IMP) | [GO:0040011] BIOLOGICAL_PROCESS locomotion (IMP)	WBGene00009939
174339_at	0.74627	0.0002	16.3543	5.4106e-05	7.167	0.807934	0.862014	2.34784	5843.55	---	---			173125_s_at	0.36741	0.0026	4.7832	0.0035705	19.557	0.252524	0.907911	3.70116	7621.11	unc-44	B0350.2	[GO:0016328] CELLULAR_COMPONENT lateral plasma membrane (IDA) via [WBPaper00004127] Moorthy S et al. (2000) | [GO:0040018] BIOLOGICAL_PROCESS positive regulation of multicellular organism growth (IMP) | [GO:0040011] BIOLOGICAL_PROCESS locomotion (IMP) | [GO:0005515] MOLECULAR_FUNCTION protein binding (IEA) | [GO:0007165] BIOLOGICAL_PROCESS signal transduction (IEA) | [GO:0004553] MOLECULAR_FUNCTI…	WBGene00006780
174437_at	0.57572	0.0023	8.3448	0.0013245	8.077	0.651055	0.850337	9.28741	215.032	F10E9.12	F10E9.12	[GO:0005507] MOLECULAR_FUNCTION copper ion binding (IEA) | [GO:0008131] MOLECULAR_FUNCTION amine oxidase activity (IEA) | [GO:0009308] BIOLOGICAL_PROCESS amine metabolic process (IEA) | [GO:0048038] MOLECULAR_FUNCTION quinone binding (IEA)	WBGene00017361	173151_s_at	0.38236	0.0015	3.3911	0.018554	9.598	0.297027	0.643697	3.14976	2535.11	C17C3.1	C17C3.1	[GO:0006637] BIOLOGICAL_PROCESS acyl-CoA metabolic process (IEA) | [GO:0016291] MOLECULAR_FUNCTION acyl-CoA thioesterase activity (IEA) | [GO:0016021] CELLULAR_COMPONENT integral to membrane (IEA)	WBGene00015887
174453_at	0.52751	0	3.7926	0.027167	6.198	0.467713	0.676221	2.21863	2443.61	C34F6.10	C34F6.10			173154_s_at	0.30186	0.0024	2.7556	0.041869	9.613	0.105644	0.592793	2.26894	29.5542	T26F2.2	T26F2.2		WBGene00012058
174470_at	0.49976	0.0053	3.4292	0.037264	5.145	0.366286	0.613715	3.42914	1255.9	bam-2	Y71F9AR.1			173160_s_at	0.23917	0.0199	2.957	0.032222	13.799	0.147509	0.280296	1.76952	1591.74	F36D3.1	F36D3.1	[GO:0040010] BIOLOGICAL_PROCESS positive regulation of growth rate (IMP) | [GO:0009792] BIOLOGICAL_PROCESS embryonic development ending in birth or egg hatching (IMP)	WBGene00009469
174490_at	0.5754	0.0035	3.8321	0.026274	3.394	0.407394	0.763341	2.18985	9418.33	C04C11.2	C04C11.2			173163_s_at	0.3138	0.0054	3.0097	0.030103	10.613	0.105909	0.631435	4.22048	285.679	mnk-1	R166.5	[GO:0004672] MOLECULAR_FUNCTION protein kinase activity (IEA) | [GO:0005524] MOLECULAR_FUNCTION ATP binding (IEA) | [GO:0006468] BIOLOGICAL_PROCESS protein amino acid phosphorylation (IEA) | [GO:0004713] MOLECULAR_FUNCTION protein tyrosine kinase activity (IEA) | [GO:0004674] MOLECULAR_FUNCTION protein serine/threonine kinase activity (IEA)	WBGene00011304
174494_s_at	0.41234	0.0049	4.3327	0.017437	17.189	0.443846	0.589557	3.16758	12063.9	T26A5.5	T26A5.5	[GO:0040010] BIOLOGICAL_PROCESS positive regulation of growth rate (IMP)	WBGene00020821	173190_s_at	0.41877	0.0006	4.5449	0.0046726	13.787	0.239743	0.473612	3.41892	1027.98	K08A2.4	K08A2.4		WBGene00019513
174495_at	0.3813	0.0025	4.8124	0.012045	17.281	0.506325	0.685294	9.64649	270.483	K03A11.1	K03A11.1	[GO:0016888] MOLECULAR_FUNCTION endodeoxyribonuclease activity, producing 5'-phosphomonoesters (IEA)	WBGene00010519	173207_at	0.26609	0	5.3677	0.0018857	10.66	0.504444	0.86421	6.19036	4899.52	Y17D7B.7	Y17D7B.7
174526_s_at	0.64703	0.0007	9.1725	0.00087014	19.501	0.670441	0.812334	1.96887	44100.5	R06F6.12	R06F6.12		WBGene00023418	173211_at	0.3338	0.0026	3.4238	0.017812	10.532	0.318067	0.899122	2.25787	35722.4	C10C6.6	C10C6.6	[GO:0005524] MOLECULAR_FUNCTION ATP binding (IEA) | [GO:0006810] BIOLOGICAL_PROCESS transport (IEA) | [GO:0015662] MOLECULAR_FUNCTION ATPase activity, coupled to transmembrane movement of ions, phosphorylative mechanism (IEA) | [GO:0016020] CELLULAR_COMPONENT membrane (IEA) | [GO:0006812] BIOLOGICAL_PROCESS cation transport (IEA) | [GO:0016021] CELLULAR_COMPONENT integral to membrane (IEA) | [GO:…	WBGene00007514
174568_s_at	0.55806	0.0045	4.9527	0.010852	20.582	0.519243	0.692515	3.42019	11533.2	fbxc-50	C17F4.5	[GO:0040018] BIOLOGICAL_PROCESS positive regulation of multicellular organism growth (IMP)	WBGene00015912	173218_s_at	0.30896	0.0056	4.2086	0.0068931	17.777	0.318735	0.623492	4.10286	32777.8	acdh-10	T08G2.3	[GO:0003995] MOLECULAR_FUNCTION acyl-CoA dehydrogenase activity (IEA) | [GO:0009055] MOLECULAR_FUNCTION electron carrier activity (IEA) | [GO:0016491] MOLECULAR_FUNCTION oxidoreductase activity (IEA) | [GO:0008152] BIOLOGICAL_PROCESS metabolic process (IEA) | [GO:0016627] MOLECULAR_FUNCTION oxidoreductase activity, acting on the CH-CH group of donors (IEA) | [GO:0050660] MOLECULAR_FUNCTION FAD bi…	WBGene00020366
174648_at	0.40048	0.0198	3.3963	0.038375	4.989	0.361103	0.430851	2.01139	1738.11	rbc-1	F54E4.1			173227_at	0.34476	0.0024	2.7854	0.040266	18.496	0.15934	0.648089	2.19939	1611	Y82E9BR.18	Y82E9BR.18	[GO:0005525] MOLECULAR_FUNCTION GTP binding (IEA) | [GO:0006614] BIOLOGICAL_PROCESS SRP-dependent cotranslational protein targeting to membrane (IEA)	WBGene00022350
174682_at	0.44221	0.0023	5.4652	0.0075184	18.425	0.485444	0.77559	2.02622	1885.62	M03C11.8	M03C11.8			173240_s_at	0.53824	0.0001	6.9991	0.000368	22.852	0.530777	0.838676	4.12447	493843	K08D12.3	K08D12.3	[GO:0003676] MOLECULAR_FUNCTION nucleic acid binding (IEA) | [GO:0008270] MOLECULAR_FUNCTION zinc ion binding (IEA) | [GO:0000003] BIOLOGICAL_PROCESS reproduction (IMP) | [GO:0040011] BIOLOGICAL_PROCESS locomotion (IMP) | [GO:0009792] BIOLOGICAL_PROCESS embryonic development ending in birth or egg hatching (IMP) | [GO:0002119] BIOLOGICAL_PROCESS nematode larval development (IMP) | [GO:0040007] BI…	WBGene00019537
174683_at	0.30792	0.0198	3.2546	0.043606	6.228	0.353683	0.412544	4.75638	2599.24	T19D12.1	T19D12.1	[GO:0016021] CELLULAR_COMPONENT integral to membrane (IEA) | [GO:0009792] BIOLOGICAL_PROCESS embryonic development ending in birth or egg hatching (IMP)	WBGene00020576	173262_s_at	0.21915	0.001	3.3046	0.020681	8.743	0.379707	0.769301	2.3969	49547.7	F25B4.1	F25B4.1	[GO:0004047] MOLECULAR_FUNCTION aminomethyltransferase activity (IEA) | [GO:0005737] CELLULAR_COMPONENT cytoplasm (IEA) | [GO:0006546] BIOLOGICAL_PROCESS glycine catabolic process (IEA)	WBGene00017765
174768_s_at	0.40423	0.0001	6.1555	0.0047336	8.025	0.566857	0.688304	2.5388	567437	pat-10	F54C1.7	[GO:0006936] BIOLOGICAL_PROCESS muscle contraction (IMP) via [WBPaper00002748] Kagawa H et al. (1997) | [GO:0030240] BIOLOGICAL_PROCESS muscle thin filament assembly (IMP) via [WBPaper00002748] Kagawa H et al. (1997) | [GO:0009790] BIOLOGICAL_PROCESS embryonic development (IMP) via [WBPaper00002748] Kagawa H et al. (1997) | [GO:0043292] CELLULAR_COMPONENT contractile fiber (IDA) via [WBPaper00003…	WBGene00003934	173274_s_at	0.32405	0.0043	3.3889	0.018605	12.607	0.282978	0.498132	2.68979	90489.7	W01F3.2	W01F3.2	[GO:0003824] MOLECULAR_FUNCTION catalytic activity (IEA) | [GO:0046872] MOLECULAR_FUNCTION metal ion binding (IEA)	WBGene00012185
174803_at	0.73595	0.0001	16.3296	5.4524e-05	6.879	0.806838	0.849302	2.38865	2546.87	rig-1	K09E2.4			173287_s_at	0.29364	0.0041	5.6122	0.0014564	5.89	0.429493	0.707342	3.77086	54546.6	hex-1	T14F9.3	[GO:0004563] MOLECULAR_FUNCTION beta-N-acetylhexosaminidase activity (IEA) | [GO:0005975] BIOLOGICAL_PROCESS carbohydrate metabolic process (IEA) | [GO:0003824] MOLECULAR_FUNCTION catalytic activity (IEA) | [GO:0043169] MOLECULAR_FUNCTION cation binding (IEA)	WBGene00020509
174868_s_at	0.42551	0.0143	4.1344	0.020449	21.085	0.461678	0.584856	3.06595	999.012	mtm-9	Y39H10A.3	[GO:0006897] BIOLOGICAL_PROCESS endocytosis (IMP) via [WBPaper00004883] Fares H et al. (2001) | [GO:0005737] CELLULAR_COMPONENT cytoplasm (IDA) via [WBPaper00006306] Dang H et al. (2004) | [GO:0016020] CELLULAR_COMPONENT membrane (IDA) via [WBPaper00006306] Dang H et al. (2004) | [GO:0005515] MOLECULAR_FUNCTION protein binding (IDA) via [WBPaper00006306] Dang H et al. (2004) | [GO:0016311] BIOLOG…	WBGene00003479	173290_at	0.33753	0	6.3808	0.00066737	8.965	0.442784	0.858042	2.0001	44680.4	Y67D2.3	Y67D2.3	[GO:0031966] CELLULAR_COMPONENT mitochondrial membrane (IEA) | [GO:0051537] MOLECULAR_FUNCTION 2 iron, 2 sulfur cluster binding (IEA)	WBGene00022053
174889_s_at	0.31685	0.0087	4.5581	0.014615	19.436	0.450179	0.640577	1.91902	111846	knl-1	C02F5.1			173295_s_at	0.43011	0.0001	7.231	0.00029639	19.472	0.476885	0.796749	3.09575	37361.3	K12H6.6	K12H6.6	[GO:0016021] CELLULAR_COMPONENT integral to membrane (IEA)	WBGene00019686
174921_s_at	0.39529	0.0097	3.2519	0.043715	18.864	0.335433	0.483706	1.6926	184413	T06A10.4	T06A10.4	[GO:0005515] MOLECULAR_FUNCTION protein binding (IEA) | [GO:0008270] MOLECULAR_FUNCTION zinc ion binding (IEA)	WBGene00020287	173297_at	0.25906	0.0168	2.9212	0.033747	14.755	0.175627	0.47917	2.46343	1799.02	Y48G8AL.13	Y48G8AL.13	[GO:0016021] CELLULAR_COMPONENT integral to membrane (IEA)	WBGene00021691
174966_at	0.46958	0.0066	3.4129	0.03781	4.951	0.393035	0.490966	2.38245	501.885	acs-17	C46F4.2			173310_at	0.59064	0	10.1897	2.49e-05	8.02	0.532574	0.719603	3.66175	99721.1	Y51F10.7	Y51F10.7		WBGene00021768
175023_at	0.40034	0.0038	3.1479	0.048093	7.702	0.316692	0.477249	3.59712	15668.7	DC2.3	DC2.3	[GO:0005529] MOLECULAR_FUNCTION sugar binding (IEA) | [GO:0005801] CELLULAR_COMPONENT cis-Golgi network (IEA) | [GO:0006888] BIOLOGICAL_PROCESS ER to Golgi vesicle-mediated transport (IEA) | [GO:0016021] CELLULAR_COMPONENT integral to membrane (IEA)	WBGene00017080	173321_at	0.28933	0.0051	4.2501	0.0065662	11.692	0.217145	0.373621	2.93331	3477.8	T05E11.3	T05E11.3	[GO:0006457] BIOLOGICAL_PROCESS protein folding (IEA) | [GO:0051082] MOLECULAR_FUNCTION unfolded protein binding (IEA) | [GO:0005524] MOLECULAR_FUNCTION ATP binding (IEA) | [GO:0040010] BIOLOGICAL_PROCESS positive regulation of growth rate (IMP) | [GO:0002119] BIOLOGICAL_PROCESS nematode larval development (IMP) | [GO:0040007] BIOLOGICAL_PROCESS growth (IMP) | [GO:0040011] BIOLOGICAL_PROCESS loco…	WBGene00011480
175029_s_at	0.55758	0.0024	5.8683	0.0057148	18.452	0.514748	0.699877	2.21793	2775.31	F20H11.1	F20H11.1	[GO:0007242] BIOLOGICAL_PROCESS intracellular signaling cascade (IEA)	WBGene00017646	173326_s_at	0.43037	0.0003	9.4664	4.37e-05	5.908	0.655057	0.86556	4.51141	112628	Y43F8B.2	Y43F8B.2		WBGene00012813
175063_s_at	0.59724	0.0009	4.3446	0.017274	16.718	0.416892	0.685919	5.56309	200.897	T25B9.8	T25B9.8		WBGene00012014	173336_s_at	0.35116	0.0022	3.8639	0.010383	0.072	0.313442	0.643565	2.2836	490557	R09B3.2	R09B3.2	[GO:0003676] MOLECULAR_FUNCTION nucleic acid binding (IEA) | [GO:0000166] MOLECULAR_FUNCTION nucleotide binding (IEA)	WBGene00011155
175105_at	0.37206	0.0172	4.744	0.012681	5.314	0.478931	0.585794	2.87302	67.0235	F28B4.4	F28B4.4	[GO:0016021] CELLULAR_COMPONENT integral to membrane (IEA)	WBGene00017893	173355_s_at	0.27742	0.0043	2.9534	0.032371	3.782	0.219956	0.679949	3.66559	157.372	dpy-2	T14B4.6	[GO:0040014] BIOLOGICAL_PROCESS regulation of multicellular organism growth (IMP) via [WBPaper00001792] Levy AD et al. (1993) | [GO:0040032] BIOLOGICAL_PROCESS post-embryonic body morphogenesis (IMP) via [WBPaper00001792] Levy AD et al. (1993) | [GO:0005581] CELLULAR_COMPONENT collagen (ISS) via [WBPaper00001792] Levy AD et al. (1993) | [GO:0042329] MOLECULAR_FUNCTION structural constituent of co…	WBGene00001064
175120_at	0.47676	0.0057	5.3617	0.0080834	8.091	0.528004	0.539617	2.9678	8475.06	F07H5.4	F07H5.4			173368_at	0.35671	0.0016	4.8933	0.0031587	13.411	0.258464	0.502417	3.49484	411.283	Y67D2.7	Y67D2.7
175182_at	0.46897	0.0055	3.1598	0.047565	6.122	0.283889	0.443646	2.68304	3090.72	nhr-97	H27C11.1			173372_at	0.2586	0.0103	2.8121	0.038887	8.049	0.222477	0.476786	92.0468	1488.51	---	---
175216_at	0.35194	0.007	3.7059	0.029256	5.361	0.375389	0.457402	1.65001	172591	vha-14	F55H2.2	[GO:0016469] CELLULAR_COMPONENT proton-transporting two-sector ATPase complex (IEA) | [GO:0042626] MOLECULAR_FUNCTION ATPase activity, coupled to transmembrane movement of substances (IEA) | [GO:0046961] MOLECULAR_FUNCTION hydrogen ion transporting ATPase activity, rotational mechanism (IEA) | [GO:0009792] BIOLOGICAL_PROCESS embryonic development ending in birth or egg hatching (IMP) | [GO:000211…	WBGene00010130	173421_at	0.21103	0.0191	3.9772	0.0090631	2.35	0.342406	0.743063	2.18666	28662	vha-2	Y38F2AL.4
175268_at	0.3086	0.0122	5.2433	0.0087907	20.888	0.523315	0.575055	2.37437	16153.4	T09B9.1	T09B9.1	[GO:0008152] BIOLOGICAL_PROCESS metabolic process (IEA) | [GO:0016787] MOLECULAR_FUNCTION hydrolase activity (IEA) | [GO:0016021] CELLULAR_COMPONENT integral to membrane (IEA)	WBGene00011642	173426_at	0.26314	0.0156	3.9095	0.0098276	19.335	0.199534	0.684588	2.8901	3230.98	rho-1	Y51H4A.3
175289_at	0.42451	0.0046	7.2527	0.0024195	9.41	0.598999	0.764074	2.63322	8464.19	flp-22	F39H2.1		WBGene00009562	173472_s_at	0.42245	0	7.0479	0.0003515	18.571	0.543887	0.671869	3.36225	57922.8	Y57A10C.6	Y57A10C.6	[GO:0003824] MOLECULAR_FUNCTION catalytic activity (IEA) | [GO:0008152] BIOLOGICAL_PROCESS metabolic process (IEA)	WBGene00013284
175298_s_at	0.56018	0.0018	12.229	0.00022781	7.486	0.745662	0.801601	2.5689	12731.7	sfxn-5	C41C4.10	[GO:0006812] BIOLOGICAL_PROCESS cation transport (IEA) | [GO:0008324] MOLECULAR_FUNCTION cation transmembrane transporter activity (IEA) | [GO:0016020] CELLULAR_COMPONENT membrane (IEA) | [GO:0016021] CELLULAR_COMPONENT integral to membrane (IEA)	WBGene00044049	173494_s_at	0.26477	0.0057	2.7416	0.042642	3.135	0.152478	0.845894	28.9858	345.174	T20F5.4	T20F5.4		WBGene00020626
175313_at	0.4884	0.0033	3.7713	0.027665	17.334	0.366422	0.553897	4.62724	24384.2	C17E4.10	C17E4.10		WBGene00007647	173495_at	0.44879	0.0009	4.4104	0.005452	7.765	0.269172	0.719937	4.20527	471.732	K11G9.5	K11G9.5	[GO:0005215] MOLECULAR_FUNCTION transporter activity (IEA) | [GO:0006810] BIOLOGICAL_PROCESS transport (IEA) | [GO:0016021] CELLULAR_COMPONENT integral to membrane (IEA)	WBGene00019655
175323_at	0.43808	0.0076	4.2311	0.018911	18.428	0.457635	0.604641	1.77112	4612.07	gld-3	T07F8.3	[GO:0042006] BIOLOGICAL_PROCESS masculinization of hermaphroditic germ-line (IMP) via [WBPaper00005566] Eckmann CR et al. (2002) | [GO:0009792] BIOLOGICAL_PROCESS embryonic development ending in birth or egg hatching (IMP) via [WBPaper00005566] Eckmann CR et al. (2002) | [GO:0002119] BIOLOGICAL_PROCESS nematode larval development (IMP) via [WBPaper00005566] Eckmann CR et al. (2002) | [GO:0042078]…	WBGene00001597	173504_at	0.2763	0.0138	3.3898	0.018584	23.524	0.313774	0.787241	3.5456	78223.5	apl-1	C42D8.8
175339_at	0.60577	0.0001	7.0023	0.0028022	19.713	0.581831	0.764754	2.01645	10746.2	Y74C9A.4	Y74C9A.4			173511_at	0.27561	0.0072	3.0195	0.029728	16.746	0.140549	0.626884	2.90874	5467.79	H37A05.1	H37A05.1	[GO:0009792] BIOLOGICAL_PROCESS embryonic development ending in birth or egg hatching (IMP) | [GO:0002119] BIOLOGICAL_PROCESS nematode larval development (IMP) | [GO:0040007] BIOLOGICAL_PROCESS growth (IMP) | [GO:0040011] BIOLOGICAL_PROCESS locomotion (IMP)	WBGene00010425
175340_at	0.54439	0.003	6.2404	0.004482	6.143	0.619403	0.782308	2.76018	3338.22	egl-44	F28B12.2			173515_s_at	0.24449	0.0073	2.7417	0.042637	17.912	0.32844	0.64282	2.53099	3735.3	vrs-2	Y87G2A.5	[GO:0000166] MOLECULAR_FUNCTION nucleotide binding (IEA) | [GO:0004812] MOLECULAR_FUNCTION aminoacyl-tRNA ligase activity (IEA) | [GO:0005524] MOLECULAR_FUNCTION ATP binding (IEA) | [GO:0005737] CELLULAR_COMPONENT cytoplasm (IEA) | [GO:0006412] BIOLOGICAL_PROCESS translation (IEA) | [GO:0006418] BIOLOGICAL_PROCESS tRNA aminoacylation for protein translation (IEA) | [GO:0004832] MOLECULAR_FUNCTION…	WBGene00006936
175360_at	0.3838	0.0024	3.8158	0.026639	17.428	0.398483	0.558943	3.84264	671.326	ceh-41	T26C11.5			173524_at	0.45565	0.0003	7.2938	0.00027971	17.819	0.366711	0.648456	1.73977	276122	D2096.8	D2096.8	[GO:0005634] CELLULAR_COMPONENT nucleus (IEA) | [GO:0006334] BIOLOGICAL_PROCESS nucleosome assembly (IEA) | [GO:0040010] BIOLOGICAL_PROCESS positive regulation of growth rate (IMP) | [GO:0009792] BIOLOGICAL_PROCESS embryonic development ending in birth or egg hatching (IMP) | [GO:0002009] BIOLOGICAL_PROCESS morphogenesis of an epithelium (IMP) | [GO:0040011] BIOLOGICAL_PROCESS locomotion (IMP) | …	WBGene00017075
175361_at	0.51941	0.0029	3.3915	0.038539	17.325	0.367622	0.455082	2.1499	21807.3	sig-7	F39H2.2	[GO:0003676] MOLECULAR_FUNCTION nucleic acid binding (IEA) | [GO:0003755] MOLECULAR_FUNCTION peptidyl-prolyl cis-trans isomerase activity (IEA) | [GO:0000166] MOLECULAR_FUNCTION nucleotide binding (IEA) | [GO:0009792] BIOLOGICAL_PROCESS embryonic development ending in birth or egg hatching (IMP) | [GO:0002119] BIOLOGICAL_PROCESS nematode larval development (IMP) | [GO:0040007] BIOLOGICAL_PROCESS …	WBGene00000890	173536_s_at	0.41346	0.0005	5.2675	0.0020993	7.014	0.326696	0.667595	2.41527	34702.2	K02B2.3	K02B2.3		WBGene00019296
175362_at	0.43577	0.0007	6.2745	0.0043855	17.747	0.548408	0.643055	3.2229	136.934	ZK177.1	ZK177.1			173558_at	0.33699	0.0005	3.3216	0.020244	8.907	0.259936	0.546001	4.71891	2319.14	ZC443.3	ZC443.3		WBGene00013898
175453_at	0.52043	0.0048	4.7335	0.012782	5.674	0.487633	0.58615	2.99971	943.108	syn-2	F48F7.2			173560_s_at	0.29124	0.0001	4.7394	0.0037501	22.405	0.29425	0.500254	2.58296	31955.3	H19N07.3	H19N07.3		WBGene00010407
175456_at	0.56187	0.0013	3.9126	0.024554	20.883	0.367373	0.61717	3.00339	146.328	W05H9.4	W05H9.4		WBGene00021051	173575_s_at	0.35803	0.0004	4.3429	0.0058939	16.541	0.281543	0.755293	189.357	396.861	F19H6.5	F19H6.5		WBGene00008960
175495_at	0.32718	0.0186	3.9011	0.024792	17.812	0.4068	0.623961	2.41688	21693.9	rlbp-1	T23G11.5			173589_at	0.25682	0.0145	3.3099	0.020544	12.986	0.180023	0.500021	2.95667	84.1452	Y105C5A.1	Y105C5A.1	[GO:0009792] BIOLOGICAL_PROCESS embryonic development ending in birth or egg hatching (IMP) | [GO:0000003] BIOLOGICAL_PROCESS reproduction (IMP)	WBGene00013632
175519_at	0.47149	0.0066	4.7247	0.012868	6.524	0.44622	0.778319	5.31996	1605.25	F59C6.11	F59C6.11	[GO:0016021] CELLULAR_COMPONENT integral to membrane (IEA)	WBGene00010328	173600_s_at	0.30314	0.0022	2.7816	0.040468	13.308	0.0139721	0.31095	2.37436	2572.24	R07E4.5	R07E4.5		WBGene00019938
175524_at	0.30816	0.0028	5.1079	0.0096886	8.553	0.515196	0.57733	3.25903	72733.9	C41G11.1	C41G11.1	[GO:0016021] CELLULAR_COMPONENT integral to membrane (IEA)	WBGene00016568	173604_at	0.37741	0.0019	3.833	0.010776	7.723	0.260847	0.69126	1.93857	1310.15	C14A11.9	C14A11.9		WBGene00050944
175561_s_at	0.40472	0.0038	4.7575	0.012553	6.173	0.499044	0.723002	4.1387	644.585	unc-44	B0350.2	[GO:0016328] CELLULAR_COMPONENT lateral plasma membrane (IDA) via [WBPaper00004127] Moorthy S et al. (2000) | [GO:0040018] BIOLOGICAL_PROCESS positive regulation of multicellular organism growth (IMP) | [GO:0040011] BIOLOGICAL_PROCESS locomotion (IMP) | [GO:0005515] MOLECULAR_FUNCTION protein binding (IEA) | [GO:0007165] BIOLOGICAL_PROCESS signal transduction (IEA) | [GO:0004553] MOLECULAR_FUNCTI…	WBGene00006780	173618_s_at	0.39095	0.0015	3.9465	0.0094014	19.386	0.257482	0.706335	4.02478	439.799	T12E12.3	T12E12.3		WBGene00020464
175566_s_at	0.54429	0.0027	3.7252	0.028775	5.849	0.379742	0.76979	3.38838	7618.1	ugt-50	T07C5.1	[GO:0008152] BIOLOGICAL_PROCESS metabolic process (IEA) | [GO:0016758] MOLECULAR_FUNCTION transferase activity, transferring hexosyl groups (IEA) | [GO:0016021] CELLULAR_COMPONENT integral to membrane (IEA)	WBGene00011564	173620_s_at	0.53279	0	6.4003	0.00065468	8.077	0.515997	0.779737	6.37429	667.648	ugt-51	C03A7.11	[GO:0008152] BIOLOGICAL_PROCESS metabolic process (IEA) | [GO:0016758] MOLECULAR_FUNCTION transferase activity, transferring hexosyl groups (IEA) | [GO:0016021] CELLULAR_COMPONENT integral to membrane (IEA)	WBGene00015369
175580_s_at	0.47704	0.0029	4.4311	0.016134	17.567	0.437543	0.764568	2.52625	5082.85	F57C9.4	F57C9.4	[GO:0005622] CELLULAR_COMPONENT intracellular (IEA) | [GO:0008270] MOLECULAR_FUNCTION zinc ion binding (IEA) | [GO:0003676] MOLECULAR_FUNCTION nucleic acid binding (IEA) | [GO:0009792] BIOLOGICAL_PROCESS embryonic development ending in birth or egg hatching (IMP)	WBGene00019011	173622_s_at	0.36034	0.0017	3.1405	0.02546	18.66	0.153314	0.556872	2.59827	1467.84	F10G7.10	F10G7.10	[GO:0004842] MOLECULAR_FUNCTION ubiquitin-protein ligase activity (IEA) | [GO:0008270] MOLECULAR_FUNCTION zinc ion binding (IEA)	WBGene00017373
175581_at	0.37523	0.0079	3.5632	0.033108	6.636	0.445428	0.645515	3.04582	499.768	T05A8.3	T05A8.3			173634_at	0.34542	0.0032	4.6668	0.0040693	19.265	0.237598	0.665957	4.39185	22261.9	M28.6	M28.6
175691_s_at	0.47378	0.0021	3.1059	0.05	4.165	0.250338	0.466205	2.91947	7484.5	let-805	H19M22.2	[GO:0016021] CELLULAR_COMPONENT integral to membrane (IEA) | [GO:0000003] BIOLOGICAL_PROCESS reproduction (IMP) | [GO:0002119] BIOLOGICAL_PROCESS nematode larval development (IMP) | [GO:0008340] BIOLOGICAL_PROCESS determination of adult life span (IMP) | [GO:0040011] BIOLOGICAL_PROCESS locomotion (IMP) | [GO:0009792] BIOLOGICAL_PROCESS embryonic development ending in birth or egg hatching (IMP) |…	WBGene00002915	173637_s_at	0.23559	0.0114	3.5915	0.014468	22.124	0.267611	0.455897	3.71786	1359.24	C05D10.1	C05D10.1		WBGene00015477
175749_s_at	0.45522	0.0068	4.8955	0.011321	17.866	0.515793	0.60231	5.21315	862.204	pqn-21	C37A2.5			173642_at	0.20324	0.0183	4.1963	0.0069933	9.258	0.368186	0.909674	4.01866	679.232	Y22D7AR.6	Y22D7AR.6	[GO:0008440] MOLECULAR_FUNCTION inositol trisphosphate 3-kinase activity (IEA)	WBGene00021260
175786_at	0.50774	0.0057	3.9598	0.023607	7.038	0.349861	0.588894	3.61431	5441.86	cki-1	T05A6.1	[GO:0004861] MOLECULAR_FUNCTION cyclin-dependent protein kinase inhibitor activity (IEA) | [GO:0005634] CELLULAR_COMPONENT nucleus (IEA) | [GO:0007050] BIOLOGICAL_PROCESS cell cycle arrest (IEA) | [GO:0009792] BIOLOGICAL_PROCESS embryonic development ending in birth or egg hatching (IMP) | [GO:0018991] BIOLOGICAL_PROCESS oviposition (IMP) | [GO:0010171] BIOLOGICAL_PROCESS body morphogenesis (IMP)…	WBGene00000516	173643_at	0.28415	0.0082	3.5265	0.015676	7.904	0.328638	0.698043	2.63985	1192.67	sms-3	Y22D7AL.8	[GO:0016021] CELLULAR_COMPONENT integral to membrane (IEA)	WBGene00004894
175817_at	0.53936	0.0012	6.4437	0.0039402	6.214	0.581872	0.694737	2.30492	343.4	gly-12	F48E3.1	[GO:0000139] CELLULAR_COMPONENT Golgi membrane (IEA) | [GO:0003827] MOLECULAR_FUNCTION alpha-1,3-mannosylglycoprotein 2-beta-N-acetylglucosaminyltransferase activity (IEA) | [GO:0006487] BIOLOGICAL_PROCESS protein amino acid N-linked glycosylation (IEA) | [GO:0016021] CELLULAR_COMPONENT integral to membrane (IEA) | [GO:0009792] BIOLOGICAL_PROCESS embryonic development ending in birth or egg hatch…	WBGene00001637175817_at	173644_at	0.26486	0.0169	2.7994	0.039537	19.699	0.261617	0.633242	5.35299	18557.5	K02D7.1	K02D7.1	[GO:0003824] MOLECULAR_FUNCTION catalytic activity (IEA) | [GO:0009116] BIOLOGICAL_PROCESS nucleoside metabolic process (IEA) | [GO:0016763] MOLECULAR_FUNCTION transferase activity, transferring pentosyl groups (IEA) | [GO:0004731] MOLECULAR_FUNCTION purine-nucleoside phosphorylase activity (IEA) | [GO:0006139] BIOLOGICAL_PROCESS nucleobase, nucleoside, nucleotide and nucleic acid metabolic proce…	WBGene00019298
175860_s_at	0.51014	0.0062	4.8587	0.011635	17.278	0.479251	0.762676	4.91504	1471.15	dnj-10	F22B7.5	[GO:0006457] BIOLOGICAL_PROCESS protein folding (ISS) via [WBPaper00003297] Consortium TCeGS (1998) | [GO:0006457] BIOLOGICAL_PROCESS protein folding (IEA) | [GO:0051082] MOLECULAR_FUNCTION unfolded protein binding (ISS) via [WBPaper00003297] Consortium TCeGS (1998) | [GO:0051082] MOLECULAR_FUNCTION unfolded protein binding (IEA) | [GO:0005739] CELLULAR_COMPONENT mitochondrion (ISS) via [WBPaper0…	WBGene00001028	173668_s_at	0.40326	0.0007	3.7521	0.011886	22.067	0.0794263	0.557643	3.07056	779.653	F52G2.3	F52G2.3	[GO:0009792] BIOLOGICAL_PROCESS embryonic development ending in birth or egg hatching (IMP)	WBGene00009943
175870_s_at	0.39184	0.0078	3.2326	0.044493	6.789	0.28406	0.628098	11.6863	12002.2	Y34F4.4	Y34F4.4		WBGene00021339	173669_s_at	0.54568	0.0001	7.2407	0.00029374	21.961	0.340507	0.764438	3.51489	108.437	K10B3.6	K10B3.6	[GO:0003824] MOLECULAR_FUNCTION catalytic activity (IEA) | [GO:0005975] BIOLOGICAL_PROCESS carbohydrate metabolic process (IEA) | [GO:0006071] BIOLOGICAL_PROCESS glycerol metabolic process (IEA) | [GO:0008889] MOLECULAR_FUNCTION glycerophosphodiester phosphodiesterase activity (IEA) | [GO:0006629] BIOLOGICAL_PROCESS lipid metabolic process (IEA) | [GO:0008081] MOLECULAR_FUNCTION phosphoric dieste…	WBGene00019612
175872_at	0.42552	0.002	4.4434	0.01598	8.869	0.400788	0.539247	1.95076	382907	clec-150	R06B10.3	[GO:0005488] MOLECULAR_FUNCTION binding (IEA)	WBGene00019914	173671_at	0.28894	0.0046	2.6218	0.049924	8.304	0.302916	0.554279	1.69162	60137.6	F33D4.4	F33D4.4	[GO:0016705] MOLECULAR_FUNCTION oxidoreductase activity, acting on paired donors, with incorporation or reduction of molecular oxygen (IEA) | [GO:0016021] CELLULAR_COMPONENT integral to membrane (IEA)	WBGene00017996
175931_s_at	0.47081	0.0071	3.4612	0.03622	17.195	0.381566	0.475012	4.03933	1897.19	Y73B3A.16	Y73B3A.16	[GO:0004672] MOLECULAR_FUNCTION protein kinase activity (IEA) | [GO:0005524] MOLECULAR_FUNCTION ATP binding (IEA) | [GO:0006468] BIOLOGICAL_PROCESS protein amino acid phosphorylation (IEA) | [GO:0004674] MOLECULAR_FUNCTION protein serine/threonine kinase activity (IEA)	WBGene00022218	173688_s_at	0.27496	0.0066	3.4688	0.01684	2.972	0.209396	0.447548	17.6277	32799	T22B7.7	T22B7.7		WBGene00020674
175942_s_at	0.49332	0.0047	7.0814	0.0026741	18.724	0.628384	0.674619	2.17879	6729.35	Y105E8A.21	Y105E8A.21		WBGene00013679	173692_at	0.3598	0.0016	2.9678	0.031776	7.104	0.218806	0.474059	1.70334	91450.6	E04A4.5	E04A4.5	[GO:0005743] CELLULAR_COMPONENT mitochondrial inner membrane (IEA) | [GO:0008565] MOLECULAR_FUNCTION protein transporter activity (IEA) | [GO:0015031] BIOLOGICAL_PROCESS protein transport (IEA) | [GO:0005744] CELLULAR_COMPONENT mitochondrial inner membrane presequence translocase complex (IEA) | [GO:0006886] BIOLOGICAL_PROCESS intracellular protein transport (IEA) | [GO:0015450] MOLECULAR_FUNCTIO…	WBGene00017119
176051_s_at	0.40902	0.0121	4.5044	0.015237	6.081	0.445616	0.598873	2.89272	883.915	nhr-92	Y41D4B.8	[GO:0003700] MOLECULAR_FUNCTION transcription factor activity (IEA) | [GO:0003707] MOLECULAR_FUNCTION steroid hormone receptor activity (IEA) | [GO:0005634] CELLULAR_COMPONENT nucleus (IEA) | [GO:0006355] BIOLOGICAL_PROCESS regulation of transcription, DNA-dependent (IEA) | [GO:0008270] MOLECULAR_FUNCTION zinc ion binding (IEA) | [GO:0043565] MOLECULAR_FUNCTION sequence-specific DNA binding (IEA)	WBGene00003682	173702_at	0.31407	0.0059	3.7161	0.012419	9.294	0.239678	0.679314	3.06971	56006	imp-2	T05E11.5
176061_at	0.5876	0.0015	5.4652	0.0075185	17.661	0.442624	0.879155	11.7464	18062.3	ZK686.4	ZK686.4	[GO:0003676] MOLECULAR_FUNCTION nucleic acid binding (IEA) | [GO:0008270] MOLECULAR_FUNCTION zinc ion binding (IEA) | [GO:0005622] CELLULAR_COMPONENT intracellular (IEA)	WBGene00022794	173725_s_at	0.23839	0.0057	2.6931	0.045448	9.176	0.0931361	0.211863	2.76491	798230	elo-6	F41H10.8	[GO:0016021] CELLULAR_COMPONENT integral to membrane (IEA) | [GO:0040010] BIOLOGICAL_PROCESS positive regulation of growth rate (IMP)	WBGene00001244
176150_at	0.48624	0.0056	4.381	0.016784	20.302	0.465277	0.516578	2.78703	1942.62	Y50D4A.1	Y50D4A.1	[GO:0003735] MOLECULAR_FUNCTION structural constituent of ribosome (IEA) | [GO:0005622] CELLULAR_COMPONENT intracellular (IEA) | [GO:0005840] CELLULAR_COMPONENT ribosome (IEA) | [GO:0006412] BIOLOGICAL_PROCESS translation (IEA)	WBGene00021735	173737_at	0.39541	0.0002	4.9278	0.0030404	8.051	0.31822	0.578699	3.35888	106869	acl-12	C01C10.3
176163_at	0.52845	0.0044	4.4779	0.015555	6.908	0.415194	0.798184	3.92754	12517.3	Y119C1B.9	Y119C1B.9		WBGene00022474	173760_s_at	0.37291	0.0016	3.8841	0.010133	1.052	0.168245	0.578017	4.89628	3114.37	lrp-2	T21E3.3	[GO:0016020] CELLULAR_COMPONENT membrane (IEA) | [GO:0016021] CELLULAR_COMPONENT integral to membrane (IEA) | [GO:0016477] BIOLOGICAL_PROCESS cell migration (IMP)	WBGene00003072
176166_s_at	0.38851	0.0114	3.8681	0.025489	6.721	0.399922	0.43635	4.21848	4305.33	fbxa-77	Y119D3B.6		WBGene00022484	173763_s_at	0.37834	0.0024	4.8683	0.0032474	21.922	0.463075	0.682935	10.1064	870.663	gst-41	R13D7.7		WBGene00001789
176209_at	0.52309	0.0004	5.3831	0.0079626	8.684	0.560264	0.872454	4.3698	10296.5	Y58A7A.5	Y58A7A.5	[GO:0016021] CELLULAR_COMPONENT integral to membrane (IEA)	WBGene00021979	173769_s_at	0.33611	0.0025	4.4841	0.0050089	10.119	0.486969	0.649445	5.34041	199.813	M176.8	M176.8
176217_at	0.45938	0.0063	3.2966	0.041975	6.375	0.26307	0.618263	4.04676	20725.5	Y54E5A.1	Y54E5A.1	[GO:0016705] MOLECULAR_FUNCTION oxidoreductase activity, acting on paired donors, with incorporation or reduction of molecular oxygen (IEA) | [GO:0016021] CELLULAR_COMPONENT integral to membrane (IEA)	WBGene00013197	173788_at	0.31438	0.0038	3.0912	0.027115	19.079	0.335608	0.669844	5.70647	6820.52	Y54E10A.16	Y54E10A.16
176260_at	0.56624	0.0018	7.6673	0.0019113	7.175	0.632236	0.789907	2.52563	13345.1	Y58A7A.1	Y58A7A.1	[GO:0005375] MOLECULAR_FUNCTION copper ion transmembrane transporter activity (IEA) | [GO:0006825] BIOLOGICAL_PROCESS copper ion transport (IEA) | [GO:0016021] CELLULAR_COMPONENT integral to membrane (IEA)	WBGene00021975	173815_s_at	0.31934	0.0009	2.9614	0.032036	1.558	0.24758	0.744437	3.62642	89.0536	tnt-3	C14F5.3		WBGene00006588
176276_s_at	0.42708	0.0061	5.0382	0.010192	5.359	0.497413	0.657598	1.52128	45.4184	Y69A2AR.13	Y69A2AR.13		WBGene00022084	173838_at	0.34606	0.0011	3.3213	0.020252	10.251	0.226278	0.750985	2.45113	45584.4	ile-1	K07A1.8	[GO:0003677] MOLECULAR_FUNCTION DNA binding (IEA) | [GO:0006355] BIOLOGICAL_PROCESS regulation of transcription, DNA-dependent (IEA) | [GO:0016020] CELLULAR_COMPONENT membrane (IEA) | [GO:0016021] CELLULAR_COMPONENT integral to membrane (IEA)	WBGene00002070
176285_s_at	0.51128	0.0021	4.7153	0.012959	7.139	0.446854	0.733438	3.97018	63768.5	Y71H2AM.13	Y71H2AM.13		WBGene00022178	173840_s_at	0.36319	0.0007	2.9809	0.03124	9.769	0.131472	0.512098	6.05567	59.8758	clec-15	T07D10.4	[GO:0005488] MOLECULAR_FUNCTION binding (IEA) | [GO:0016021] CELLULAR_COMPONENT integral to membrane (IEA) | [GO:0040010] BIOLOGICAL_PROCESS positive regulation of growth rate (IMP)	WBGene00011584
176347_at	0.41355	0.0194	3.1448	0.04823	7.061	0.236381	0.860461	5.01617	134196	Y22D7AL.15	Y22D7AL.15	[GO:0016021] CELLULAR_COMPONENT integral to membrane (IEA)	WBGene00021253	173843_s_at	0.37394	0.0006	7.201	0.00030475	16.524	0.547319	0.83796	5.25645	2106.28	kgb-1	T07A9.3	[GO:0007143] BIOLOGICAL_PROCESS female meiosis (IMP) via [WBPaper00005583] Smith P et al. (2002) | [GO:0007140] BIOLOGICAL_PROCESS male meiosis (IMP) via [WBPaper00005583] Smith P et al. (2002) | [GO:0001556] BIOLOGICAL_PROCESS oocyte maturation (IMP) via [WBPaper00005583] Smith P et al. (2002) | [GO:0000003] BIOLOGICAL_PROCESS reproduction (IMP) via [WBPaper00005583] Smith P et al. (2002) | [GO:…	WBGene00002187
176389_s_at	0.62566	0.0007	5.4617	0.0075368	20.692	0.529018	0.644094	2.15576	1435.66	ppgn-1	Y38F2AR.7	[GO:0000166] MOLECULAR_FUNCTION nucleotide binding (IEA) | [GO:0017111] MOLECULAR_FUNCTION nucleoside-triphosphatase activity (IEA) | [GO:0004222] MOLECULAR_FUNCTION metalloendopeptidase activity (IEA) | [GO:0016020] CELLULAR_COMPONENT membrane (IEA) | [GO:0030163] BIOLOGICAL_PROCESS protein catabolic process (IEA) | [GO:0016021] CELLULAR_COMPONENT integral to membrane (IEA)	WBGene00021425	173862_s_at	0.25983	0.007	3.7452	0.011987	21.854	0.37059	0.734987	3.10057	1022.96	F15E6.6	F15E6.6	[GO:0009055] MOLECULAR_FUNCTION electron carrier activity (IEA) | [GO:0016491] MOLECULAR_FUNCTION oxidoreductase activity (IEA) | [GO:0051536] MOLECULAR_FUNCTION iron-sulfur cluster binding (IEA) | [GO:0003824] MOLECULAR_FUNCTION catalytic activity (IEA) | [GO:0050660] MOLECULAR_FUNCTION FAD binding (IEA) | [GO:0000003] BIOLOGICAL_PROCESS reproduction (IMP)	WBGene00017487
176397_at	0.63154	0.0008	4.3486	0.017218	5.669	0.429243	0.695661	2.59606	927.766	bam-2	Y71F9AR.1	[GO:0005887] CELLULAR_COMPONENT integral to plasma membrane (IDA) via [WBPaper00006123] Colavita A et al. (2003) | [GO:0016021] CELLULAR_COMPONENT integral to membrane (IEA)	WBGene00000237	173878_at	0.26026	0.0053	3.4541	0.01715	17.137	0.226547	0.765875	7.18092	1736.87	nhr-2	C32F10.6
176414_s_at	0.56781	0.0025	4.6145	0.013995	17.041	0.474959	0.658873	3.95651	2611.5	C30F12.2	C30F12.2	[GO:0009792] BIOLOGICAL_PROCESS embryonic development ending in birth or egg hatching (IMP)	WBGene00016261	173880_s_at	0.28254	0.008	2.8833	0.035446	1.909	0.172841	0.59416	2.75734	26.5534	let-75	R06C7.10
176415_at	0.5149	0.001	6.745	0.003271	19.663	0.614392	0.757844	2.23738	3559.66	Y71G12B.8	Y71G12B.8	[GO:0003676] MOLECULAR_FUNCTION nucleic acid binding (IEA) | [GO:0005524] MOLECULAR_FUNCTION ATP binding (IEA) | [GO:0008026] MOLECULAR_FUNCTION ATP-dependent helicase activity (IEA) | [GO:0004386] MOLECULAR_FUNCTION helicase activity (IEA) | [GO:0040010] BIOLOGICAL_PROCESS positive regulation of growth rate (IMP) | [GO:0002119] BIOLOGICAL_PROCESS nematode larval development (IMP) | [GO:0040007] …	WBGene00022148	173911_s_at	0.65128	0	11.1306	1.25e-05	16.846	0.614613	0.724881	13.8153	73065.4	F58F9.7	F58F9.7	[GO:0003995] MOLECULAR_FUNCTION acyl-CoA dehydrogenase activity (IEA) | [GO:0003997] MOLECULAR_FUNCTION acyl-CoA oxidase activity (IEA) | [GO:0005777] CELLULAR_COMPONENT peroxisome (IEA) | [GO:0006631] BIOLOGICAL_PROCESS fatty acid metabolic process (IEA) | [GO:0050660] MOLECULAR_FUNCTION FAD binding (IEA) | [GO:0009055] MOLECULAR_FUNCTION electron carrier activity (IEA) | [GO:0016491] MOLECULAR_…	WBGene00019060
176425_s_at	0.45056	0.0036	5.0322	0.010237	6.24	0.535333	0.694102	3.35195	24049.5	lev-11	Y105E8B.1	[GO:0030833] BIOLOGICAL_PROCESS regulation of actin filament polymerization (IDA) via [WBPaper00005168] Ono S et al. (2002) | [GO:0043393] BIOLOGICAL_PROCESS regulation of protein binding (IDA) via [WBPaper00005168] Ono S et al. (2002) | [GO:0005865] CELLULAR_COMPONENT striated muscle thin filament (IDA) via [WBPaper00005168] Ono S et al. (2002) | [GO:0051015] MOLECULAR_FUNCTION actin filament bi…	WBGene00002978	173938_s_at	0.4741	0.0001	7.7583	0.00018367	20.243	0.522479	0.78931	3.89828	30697.9	gst-20	Y48E1B.10		WBGene00001768
176432_at	0.55756	0.0016	3.204	0.045672	17.219	0.315459	0.715785	2.75778	1806.4	Y105E8B.7	Y105E8B.7	[GO:0005634] CELLULAR_COMPONENT nucleus (IEA) | [GO:0006355] BIOLOGICAL_PROCESS regulation of transcription, DNA-dependent (IEA)	WBGene00013692	173964_s_at	0.31905	0.0038	2.7924	0.039899	11.668	0.0292714	0.3946	3.16844	13775.9	cyl-1	C52E4.6	[GO:0040010] BIOLOGICAL_PROCESS positive regulation of growth rate (IMP) | [GO:0009792] BIOLOGICAL_PROCESS embryonic development ending in birth or egg hatching (IMP) | [GO:0002119] BIOLOGICAL_PROCESS nematode larval development (IMP) | [GO:0008340] BIOLOGICAL_PROCESS determination of adult life span (IMP) | [GO:0040007] BIOLOGICAL_PROCESS growth (IMP) | [GO:0040011] BIOLOGICAL_PROCESS locomotion…	WBGene00000876
176474_at	0.45509	0.0086	3.1391	0.048484	5.426	0.245156	0.711159	2.34391	86.6488	Y54F10AM.6	Y54F10AM.6		WBGene00021850	173967_s_at	0.38252	0.002	5.2579	0.0021211	20.148	0.231981	0.530453	1.76988	15719.8	Y74C10AL.2	Y74C10AL.2	[GO:0016021] CELLULAR_COMPONENT integral to membrane (IEA)	WBGene00022280
176505_at	0.36954	0.0185	3.3608	0.039612	8.104	0.256287	0.579088	5.81346	182664	Y14H12A.1	Y14H12A.1	[GO:0016021] CELLULAR_COMPONENT integral to membrane (IEA)	WBGene00021190	173990_s_at	0.30503	0.0058	5.4909	0.0016545	23.764	0.400015	0.695975	1.89316	1.29613e+06	cpl-1	T03E6.7	[GO:0031983] CELLULAR_COMPONENT vesicle lumen (IDA) via [WBPaper00024412] Britton C et al. (2004) J Cell Sci "Cathepsin L protease (CPL-1) | [GO:0042718] CELLULAR_COMPONENT yolk granule (IDA) via [WBPaper00024412] Britton C et al. (2004) J Cell Sci "Cathepsin L protease (CPL-1) | [GO:0004197] MOLECULAR_FUNCTION cysteine-type endopeptidase activity (IEA) | [GO:0006508] BIOLOGICAL_PROCESS proteolys…	WBGene00000776
176512_at	0.43105	0.0049	5.1413	0.0094574	20.172	0.501555	0.608947	2.14742	11258.3	Y71G12B.8	Y71G12B.8	[GO:0003676] MOLECULAR_FUNCTION nucleic acid binding (IEA) | [GO:0005524] MOLECULAR_FUNCTION ATP binding (IEA) | [GO:0008026] MOLECULAR_FUNCTION ATP-dependent helicase activity (IEA) | [GO:0004386] MOLECULAR_FUNCTION helicase activity (IEA) | [GO:0040010] BIOLOGICAL_PROCESS positive regulation of growth rate (IMP) | [GO:0002119] BIOLOGICAL_PROCESS nematode larval development (IMP) | [GO:0040007] …	WBGene00022148	173993_s_at	0.24707	0.0052	4.213	0.0068576	16.326	0.132831	0.243778	4.49495	6522.56	F47H4.1	F47H4.1	[GO:0005622] CELLULAR_COMPONENT intracellular (IEA) | [GO:0008270] MOLECULAR_FUNCTION zinc ion binding (IEA)	WBGene00009834
176524_at	0.43645	0.0172	3.5091	0.034717	18.404	0.399001	0.497922	1.57792	15778.9	C35D10.7	C35D10.7	[GO:0009792] BIOLOGICAL_PROCESS embryonic development ending in birth or egg hatching (IMP) | [GO:0040010] BIOLOGICAL_PROCESS positive regulation of growth rate (IMP)	WBGene00016444	174012_s_at	0.38655	0.0012	3.5788	0.014697	14.048	0.132303	0.619317	13.8086	19986.3	F53B2.8	F53B2.8		WBGene00009957
176553_s_at	0.50878	0.0036	5.1548	0.0093658	16.74	0.458018	0.715806	6.2072	6076.49	Y108G3AL.2	Y108G3AL.2	[GO:0016021] CELLULAR_COMPONENT integral to membrane (IEA)	WBGene00022434	174025_at	0.27673	0.0116	3.4246	0.017792	1.685	0.38649	0.817419	27.5969	8123.46	smd-1	F47G4.7
176569_s_at	0.42394	0.0138	3.5111	0.034656	16.899	0.35451	0.551665	4.21365	43652.8	Y97E10AR.4	Y97E10AR.4		WBGene00022399	174045_s_at	0.34052	0.0032	4.2144	0.0068462	20.348	0.347076	0.895806	4.55093	129.071	snf-1	W03G9.1	[GO:0005328] MOLECULAR_FUNCTION neurotransmitter:sodium symporter activity (IEA) | [GO:0005887] CELLULAR_COMPONENT integral to plasma membrane (IEA) | [GO:0006836] BIOLOGICAL_PROCESS neurotransmitter transport (IEA) | [GO:0016020] CELLULAR_COMPONENT membrane (IEA) | [GO:0016021] CELLULAR_COMPONENT integral to membrane (IEA)	WBGene00004900
176627_s_at	0.45747	0.0011	4.8115	0.012053	7.213	0.569655	0.822873	3.46187	165917	mlc-1	C36E6.3	[GO:0002119] BIOLOGICAL_PROCESS nematode larval development (IGI) via [WBPaper00003259] Rushforth AM et al. (1998) | [GO:0002119] BIOLOGICAL_PROCESS nematode larval development (IMP) | [GO:0007517] BIOLOGICAL_PROCESS muscle development (IGI) via [WBPaper00003259] Rushforth AM et al. (1998) | [GO:0040011] BIOLOGICAL_PROCESS locomotion (IGI) via [WBPaper00003259] Rushforth AM et al. (1998) | [GO:00…	WBGene00003369	174061_s_at	0.39237	0.0011	6.0342	0.00094347	10.293	0.435694	0.768023	2.20865	213881	C48B6.10	C48B6.10	[GO:0016021] CELLULAR_COMPONENT integral to membrane (IEA)	WBGene00016746
176631_s_at	0.45707	0.0064	3.8029	0.026932	16.949	0.417261	0.654325	2.41287	21064.6	skr-14	Y47D7A.8	[GO:0006511] BIOLOGICAL_PROCESS ubiquitin-dependent protein catabolic process (IEA) | [GO:0005515] MOLECULAR_FUNCTION protein binding (IEA) | [GO:0000003] BIOLOGICAL_PROCESS reproduction (IMP) | [GO:0045132] BIOLOGICAL_PROCESS meiotic chromosome segregation (IMP)	WBGene00004820	174075_at	0.27435	0.0011	2.9615	0.032035	4.725	0.0787104	0.906863	62.1185	472.279	tts-2	R05H5.8
176709_at	0.52381	0.0041	3.3637	0.039512	16.483	0.279463	0.712309	2.49759	10908.2	F59G1.8	F59G1.8		WBGene00019129	174089_s_at	0.36763	0.0018	4.6994	0.0039225	18.229	0.253475	0.510025	2.43273	3861.82	Y66D12A.15	Y66D12A.15	[GO:0003677] MOLECULAR_FUNCTION DNA binding (IEA) | [GO:0004003] MOLECULAR_FUNCTION ATP-dependent DNA helicase activity (IEA) | [GO:0005524] MOLECULAR_FUNCTION ATP binding (IEA) | [GO:0005634] CELLULAR_COMPONENT nucleus (IEA) | [GO:0006289] BIOLOGICAL_PROCESS nucleotide-excision repair (IEA) | [GO:0003676] MOLECULAR_FUNCTION nucleic acid binding (IEA) | [GO:0004386] MOLECULAR_FUNCTION helicase ac…	WBGene00013441
176826_at	0.47437	0.0044	3.5286	0.034128	7.314	0.299125	0.710986	5.43301	49583.8	Y40B10A.2	Y40B10A.2	[GO:0008171] MOLECULAR_FUNCTION O-methyltransferase activity (IEA)	WBGene00021487	174095_at	0.2986	0.0085	4.297	0.0062168	15.28	0.398843	0.639815	2.80313	8589.32	C05D11.7	C05D11.7	[GO:0006629] BIOLOGICAL_PROCESS lipid metabolic process (IEA) | [GO:0016021] CELLULAR_COMPONENT integral to membrane (IEA)	WBGene00015484
176828_s_at	0.45524	0.0021	3.7909	0.027207	7.072	0.392055	0.514207	2.83602	981.123	Y40B10A.9	Y40B10A.9	[GO:0016021] CELLULAR_COMPONENT integral to membrane (IEA)	WBGene00021493	174101_at	0.25271	0.0185	3.4247	0.017791	10.176	0.264456	0.912249	4.75672	106.612	scrm-1	T22H2.5	[GO:0005886] CELLULAR_COMPONENT plasma membrane (IDA) via [WBPaper00029228] Wang X et al. (2007)	WBGene00011935
176860_at	0.43375	0.0099	4.0957	0.021105	18.875	0.456868	0.581796	2.92207	119.304	F36D3.1	F36D3.1	[GO:0040010] BIOLOGICAL_PROCESS positive regulation of growth rate (IMP) | [GO:0009792] BIOLOGICAL_PROCESS embryonic development ending in birth or egg hatching (IMP)	WBGene00009469	174102_at	0.45386	0	5.9533	0.0010241	22.881	0.479799	0.958931	10.8798	5485.07	clec-82	Y54G2A.14
176876_at	0.40566	0.0107	4.0321	0.022236	21.18	0.454985	0.51691	4.63734	1343.09	CC8.2	CC8.2		WBGene00016987	174104_at	0.2981	0.0066	3.8488	0.010573	23.17	0.244701	0.469993	3.21349	957.651	Y71H2AM.7	Y71H2AM.7		WBGene00022172
176887_at	0.41356	0.0117	6.197	0.0046087	18.255	0.566542	0.607273	1.90346	214.962	Y73E7A.2	Y73E7A.2	[GO:0005634] CELLULAR_COMPONENT nucleus (IEA)	WBGene00022269	174111_at	0.24902	0.0104	5.1705	0.0023312	21.575	0.331446	0.860312	2.33071	96.2671	snf-3	T13B5.1
177038_at	0.48121	0.0052	3.6343	0.031119	9.279	0.331337	0.668394	2.94865	565355	Y94H6A.10	Y94H6A.10		WBGene00022382	174136_s_at	0.2545	0.0162	3.8253	0.010877	15.062	0.0905466	0.33749	3.47666	3523.54	K10D2.2	K10D2.2
177059_at	0.56952	0.0026	5.0089	0.010413	5.882	0.480311	0.752379	5.32527	1032.66	clec-72	Y46C8AL.5	[GO:0005488] MOLECULAR_FUNCTION binding (IEA)	WBGene00021583	174139_at	0.49375	0	14.5191	1.36e-06	9.321	0.698216	0.852757	2.91704	29321.7	xbp-1	R74.3	[GO:0005634] CELLULAR_COMPONENT nucleus (IDA) via [WBPaper00024285] Shim J et al. (2004) | [GO:0005634] CELLULAR_COMPONENT nucleus (IEA) | [GO:0003700] MOLECULAR_FUNCTION transcription factor activity (IEA) | [GO:0006355] BIOLOGICAL_PROCESS regulation of transcription, DNA-dependent (IEA) | [GO:0043565] MOLECULAR_FUNCTION sequence-specific DNA binding (IEA) | [GO:0046983] MOLECULAR_FUNCTION prote…	WBGene00006959
177066_at	0.46267	0.0039	4.0628	0.021681	7.284	0.402251	0.489036	3.53724	6370.05	Y34B4A.5	Y34B4A.5		WBGene00021321177066_at	174141_at	0.39593	0.0011	6.6	0.00053869	20.173	0.433415	0.673786	2.17	226783	unc-60	C38C3.5
177117_at	0.57078	0.001	5.1829	0.009179	20.853	0.529248	0.638534	2.00556	3302.1	fog-1	Y54E10A.4	[GO:0018992] BIOLOGICAL_PROCESS germ-line sex determination (IMP) via [WBPaper00004527] Jin S-W et al. (2001) | [GO:0006445] BIOLOGICAL_PROCESS regulation of translation (TAS) via [WBPaper00004527] Jin S-W et al. (2001) | [GO:0007283] BIOLOGICAL_PROCESS spermatogenesis (IMP) via [WBPaper00004396] Luitjens CM et al. (2000) | [GO:0005737] CELLULAR_COMPONENT cytoplasm (IDA) via [WBPaper00026645] Tho…	WBGene00001481177117_at	174236_at	0.22176	0.0041	3.209	0.023338	18.712	0.0363302	0.801191	7.99298	993.141	ceh-32	W05E10.3
177152_at	0.53831	0.0022	5.4928	0.0073756	7.17	0.499971	0.819687	2.73546	984.288	Y45G5AM.3	Y45G5AM.3		WBGene00021556	174248_at	0.31051	0.0043	3.0689	0.0279	11.134	0.333563	0.862932	1.84931	24.7149	vab-15	R07B1.1
177162_at	0.58236	0.0009	4.4148	0.016342	5.378	0.458872	0.631432	3.27109	848.75	nsy-4	Y38F2AL.1	[GO:0016021] CELLULAR_COMPONENT integral to membrane (IEA) | [GO:0010171] BIOLOGICAL_PROCESS body morphogenesis (IMP) | [GO:0040011] BIOLOGICAL_PROCESS locomotion (IMP) | [GO:0018991] BIOLOGICAL_PROCESS oviposition (IMP)	WBGene00021415	174261_at	0.44977	0.0003	7.6421	0.00020379	23.184	0.549049	0.911074	4.15581	72581.6	Y71H10B.1	Y71H10B.1
177189_at	0.38074	0.0089	4.0577	0.021773	15.459	0.395897	0.66896	1.76955	2024.32	3R5.1	3R5.1		WBGene00007065	174275_at	0.51762	0.0001	6.5892	0.00054435	20.157	0.387816	0.804646	10.3291	1673.01	K08B12.2	K08B12.2
177214_at	0.5221	0.0029	4.874	0.011503	17.12	0.457228	0.672747	2.59379	1513.75	Y45G5AM.7	Y45G5AM.7		WBGene00021559	174278_s_at	0.23481	0.0178	3.5863	0.014562	12.644	0.118929	0.524082	5.51157	536.306	M04F3.3	M04F3.3	[GO:0004672] MOLECULAR_FUNCTION protein kinase activity (IEA) | [GO:0005524] MOLECULAR_FUNCTION ATP binding (IEA) | [GO:0006468] BIOLOGICAL_PROCESS protein amino acid phosphorylation (IEA) | [GO:0004674] MOLECULAR_FUNCTION protein serine/threonine kinase activity (IEA)	WBGene00019769
177215_s_at	0.49049	0.0011	4.5719	0.014461	17.412	0.440461	0.608562	3.93976	43111.7	Y45G5AM.7	Y45G5AM.7		WBGene00021559	174301_at	0.25738	0.0104	2.939	0.03298	7.439	0.287249	0.60509	3.32021	276.353	C26B9.1	C26B9.1
177218_at	0.3826	0.012	3.232	0.044515	4.488	0.291686	0.538526	3.37641	203.119	Y53G8AM.5	Y53G8AM.5	[GO:0016021] CELLULAR_COMPONENT integral to membrane (IEA)	WBGene00021805	174315_at	0.5192	0	5.801	0.0011972	8.28	0.470478	0.783191	4.22174	46.2361	Y65B4BL.7	Y65B4BL.7	[GO:0016021] CELLULAR_COMPONENT integral to membrane (IEA)	WBGene00022039
177279_at	0.58403	0.0016	5.5304	0.0071861	6.911	0.492548	0.703247	3.22242	210768	M60.4	M60.4	[GO:0016021] CELLULAR_COMPONENT integral to membrane (IEA)	WBGene00019780	174325_at	0.25306	0.0109	3.3663	0.019138	18.312	0.0588564	0.556993	1.74945	18.959	C24A1.2	C24A1.2	[GO:0003700] MOLECULAR_FUNCTION transcription factor activity (IEA) | [GO:0005634] CELLULAR_COMPONENT nucleus (IEA) | [GO:0006355] BIOLOGICAL_PROCESS regulation of transcription, DNA-dependent (IEA) | [GO:0043565] MOLECULAR_FUNCTION sequence-specific DNA binding (IEA)	WBGene00016029
177439_s_at	0.41965	0.0024	8.475	0.0012374	8.29	0.698822	0.811505	3.30304	66107.7	F58D5.2	F58D5.2	[GO:0016021] CELLULAR_COMPONENT integral to membrane (IEA)	WBGene00010242	174326_s_at	0.31651	0.0047	3.7013	0.012646	16.583	0.352644	0.823685	3.56111	49.2575	C24A1.2	C24A1.2	[GO:0003700] MOLECULAR_FUNCTION transcription factor activity (IEA) | [GO:0005634] CELLULAR_COMPONENT nucleus (IEA) | [GO:0006355] BIOLOGICAL_PROCESS regulation of transcription, DNA-dependent (IEA) | [GO:0043565] MOLECULAR_FUNCTION sequence-specific DNA binding (IEA)	WBGene00016029
177456_at	0.48273	0.0013	5.8214	0.0058966	18.06	0.551772	0.560301	3.74714	9592.85	K08F9.4	K08F9.4	[GO:0040010] BIOLOGICAL_PROCESS positive regulation of growth rate (IMP) | [GO:0000003] BIOLOGICAL_PROCESS reproduction (IMP)	WBGene00010687	174373_s_at	0.33421	0.0026	6.032	0.00094554	17.257	0.461703	0.783881	1.74601	190825	ubq-1	F25B5.4	[GO:0006464] BIOLOGICAL_PROCESS protein modification process (IEA) | [GO:0009792] BIOLOGICAL_PROCESS embryonic development ending in birth or egg hatching (IMP) | [GO:0000003] BIOLOGICAL_PROCESS reproduction (IMP) | [GO:0002119] BIOLOGICAL_PROCESS nematode larval development (IMP) | [GO:0040007] BIOLOGICAL_PROCESS growth (IMP)	WBGene00006727
177582_s_at	0.24991	0.0144	3.5009	0.034971	20.301	0.391746	0.53147	1.82455	12965.3	rsd-2	F52G2.2		WBGene00004681	174386_at	0.40035	0.0006	6.0274	0.00094992	10.615	0.450221	0.638758	5.71292	3552.44	T07C4.9	T07C4.9
177652_at	0.54715	0.0027	4.1897	0.019552	16.372	0.359202	0.806632	4.44248	14981.3	R11A8.2	R11A8.2	[GO:0003676] MOLECULAR_FUNCTION nucleic acid binding (IEA) | [GO:0005622] CELLULAR_COMPONENT intracellular (IEA) | [GO:0009792] BIOLOGICAL_PROCESS embryonic development ending in birth or egg hatching (IMP) | [GO:0002119] BIOLOGICAL_PROCESS nematode larval development (IMP) | [GO:0040007] BIOLOGICAL_PROCESS growth (IMP) | [GO:0010171] BIOLOGICAL_PROCESS body morphogenesis (IMP) | [GO:0000003] BIO…	WBGene00011237	174393_at	0.26202	0.0165	4.0057	0.0087601	4.471	0.23208	0.680108	3.3426	60914.4	H40L08.2	H40L08.2
177653_s_at	0.47777	0.0062	3.1368	0.048585	17.391	0.215625	0.797899	4.81172	22297.4	R11A8.2	R11A8.2	[GO:0003676] MOLECULAR_FUNCTION nucleic acid binding (IEA) | [GO:0005622] CELLULAR_COMPONENT intracellular (IEA) | [GO:0009792] BIOLOGICAL_PROCESS embryonic development ending in birth or egg hatching (IMP) | [GO:0002119] BIOLOGICAL_PROCESS nematode larval development (IMP) | [GO:0040007] BIOLOGICAL_PROCESS growth (IMP) | [GO:0010171] BIOLOGICAL_PROCESS body morphogenesis (IMP) | [GO:0000003] BIO…	WBGene00011237	174404_s_at	0.36853	0.0015	3.3438	0.019685	8.286	0.180548	0.568217	5.60902	3398.3	lips-10	F14E5.5	[GO:0009792] BIOLOGICAL_PROCESS embryonic development ending in birth or egg hatching (IMP)	WBGene00008803
177666_at	0.36097	0.0039	4.5026	0.015258	8.118	0.389077	0.765603	4.7137	574.645	D1086.5	D1086.5		WBGene00008392	174429_at	0.4354	0.0001	5.6001	0.001475	19.53	0.281047	0.663102	2.53737	514.907	Y69A2AR.16	Y69A2AR.16	[GO:0008152] BIOLOGICAL_PROCESS metabolic process (IEA) | [GO:0016491] MOLECULAR_FUNCTION oxidoreductase activity (IEA)	WBGene00022087
177714_at	0.38584	0.0132	3.3968	0.038355	7.333	0.248876	0.693086	12.4599	1484.24	ZK896.1	ZK896.1		WBGene00014132	174468_s_at	0.28311	0.0106	2.8769	0.035741	17.844	0.177453	0.501646	2.65565	7704.36	cogc-3	Y71F9AM.4	[GO:0030334] BIOLOGICAL_PROCESS regulation of cell migration (IMP) via [WBPaper00026979] Kubota Y et al. (2005) | [GO:0035262] BIOLOGICAL_PROCESS gonad morphogenesis (IMP) via [WBPaper00026979] Kubota Y et al. (2005) | [GO:0005794] CELLULAR_COMPONENT Golgi apparatus (IDA) via [WBPaper00026979] Kubota Y et al. (2005) | [GO:0005783] CELLULAR_COMPONENT endoplasmic reticulum (IDA) via [WBPaper0002697…	WBGene00022121
177716_at	0.44563	0.0133	3.2024	0.045739	6.168	0.351707	0.641214	2.51791	512.205	C06C3.4	C06C3.4		WBGene00007375	174505_at	0.55621	0	8.7078	8.1e-05	18.726	0.456946	0.773148	3.96142	23947.6	T28C6.7	T28C6.7		WBGene00012121
177731_at	0.2896	0.0105	3.409	0.037941	17.742	0.434672	0.795429	13.5984	1047.89	F54F7.6	F54F7.6	[GO:0016021] CELLULAR_COMPONENT integral to membrane (IEA)	WBGene00010066	174506_at	0.38719	0.0004	5.3806	0.00186	16.641	0.329	0.707	2.19058	499.744	C27C12.2	C27C12.2
177760_at	0.57637	0.0008	4.6441	0.013681	17.126	0.419135	0.773686	6.23986	13248	ndc-80	W01B6.9	[GO:0030334] BIOLOGICAL_PROCESS regulation of cell migration (IMP) via [WBPaper00026979] Kubota Y et al. (2005) | [GO:0035262] BIOLOGICAL_PROCESS gonad morphogenesis (IMP) via [WBPaper00026979] Kubota Y et al. (2005) | [GO:0009792] BIOLOGICAL_PROCESS embryonic development ending in birth or egg hatching (IMP) | [GO:0000910] BIOLOGICAL_PROCESS cytokinesis (IMP) | [GO:0051301] BIOLOGICAL_PROCESS ce…	WBGene00003576	174526_s_at	0.35768	0.0014	4.1104	0.0077372	8.838	0.231809	0.327562	2.97449	15343.5	R06F6.12	R06F6.12		WBGene00023418
177783_at	0.41796	0.0135	3.3786	0.038986	7.362	0.359982	0.552067	3.10184	262038	ZK6.11	ZK6.11		WBGene00022645	174529_at	0.30485	0.0074	2.8279	0.038096	7.044	0.3345	0.409179	2.35972	8374.93	H28G03.1	H28G03.1
177794_at	0.42348	0.0045	3.8592	0.025681	18.683	0.458772	0.688841	1.64062	207198	T05B9.1	T05B9.1		WBGene00011464	174547_at	0.34381	0.002	3.3573	0.019356	6.617	0.359205	0.846094	4.72319	150.795	F19H8.4	F19H8.4
177796_at	0.52561	0.0018	5.3777	0.0079927	7.743	0.466183	0.778413	2.54537	1645.81	C11H1.9	C11H1.9		WBGene00023500	174552_s_at	0.3119	0.0067	2.6214	0.049952	14.757	0.0650149	0.353542	13.0901	261009	lea-1	K08H10.1	[GO:0006950] BIOLOGICAL_PROCESS response to stress (TAS) via [WBPaper00013321] Gal TZ et al. (2003)	WBGene00002263
177838_at	0.4719	0.0013	3.5732	0.032819	6.9	0.416464	0.730991	2.4505	90198.8	F37H8.5	F37H8.5	[GO:0016021] CELLULAR_COMPONENT integral to membrane (IEA)	WBGene00009514	174558_at	0.34065	0.0025	2.7968	0.039673	10.848	0.183885	0.884172	3.34678	52.7754	C33G3.6	C33G3.6		WBGene00007906
177937_s_at	0.37372	0.0069	4.9078	0.011218	20.085	0.515182	0.642916	2.00898	40790.8	cids-2	F36A2.1		WBGene00009451	174568_s_at	0.29154	0.0066	2.7087	0.044526	11.653	0.294238	0.546285	3.5909	5230.44	fbxc-50	C17F4.5	[GO:0040018] BIOLOGICAL_PROCESS positive regulation of multicellular organism growth (IMP)	WBGene00015912
177959_at	0.48264	0.0069	5.0234	0.010303	7.254	0.482357	0.732826	6.57463	1939.55	C36B1.6	C36B1.6	[GO:0016021] CELLULAR_COMPONENT integral to membrane (IEA) | [GO:0009792] BIOLOGICAL_PROCESS embryonic development ending in birth or egg hatching (IMP)	WBGene00007973	174594_at	0.30424	0.0053	4.3749	0.00568	8.869	0.424852	0.744969	2.77503	208.111	ver-3	F59F3.1
177963_at	0.4879	0.0057	3.3194	0.04112	16.044	0.243867	0.808182	3.02875	7727.05	T22C1.4	T22C1.4		WBGene00011915	174635_s_at	0.30313	0.0094	3.627	0.01385	9.813	0.247658	0.575147	2.37872	6944.18	F48E3.3	F48E3.3	[GO:0003980] MOLECULAR_FUNCTION UDP-glucose:glycoprotein glucosyltransferase activity (IEA) | [GO:0006486] BIOLOGICAL_PROCESS protein amino acid glycosylation (IEA)	WBGene00018604
177969_at	0.38639	0.0078	3.6941	0.029555	16.769	0.420497	0.489451	1.72071	11684.8	C14B1.6	C14B1.6	[GO:0000287] MOLECULAR_FUNCTION magnesium ion binding (IEA) | [GO:0004427] MOLECULAR_FUNCTION inorganic diphosphatase activity (IEA) | [GO:0005737] CELLULAR_COMPONENT cytoplasm (IEA) | [GO:0006796] BIOLOGICAL_PROCESS phosphate metabolic process (IEA)	WBGene00007577	174675_at	0.4704	0	5.3857	0.0018498	8.152	0.502247	0.809882	13.3524	1174.83	acs-2	F28F8.2	[GO:0003824] MOLECULAR_FUNCTION catalytic activity (IEA) | [GO:0008152] BIOLOGICAL_PROCESS metabolic process (IEA)	WBGene00009221
178055_at	0.52547	0.005	3.5231	0.034293	17.158	0.355622	0.523809	1.69867	42500	taf-9	T12D8.7	[GO:0005669] CELLULAR_COMPONENT transcription factor TFIID complex (IEA) | [GO:0006352] BIOLOGICAL_PROCESS transcription initiation (IEA) | [GO:0003677] MOLECULAR_FUNCTION DNA binding (IEA) | [GO:0009792] BIOLOGICAL_PROCESS embryonic development ending in birth or egg hatching (IMP) | [GO:0040015] BIOLOGICAL_PROCESS negative regulation of multicellular organism growth (IMP) | [GO:0040010] BIOLOGI…	WBGene00006391	174713_at	0.46164	0.0005	5.6921	0.00134	21.414	0.297904	0.787415	4.77012	50970.9	mrp-5	F14F4.3
178143_at	0.45729	0.0032	8.0091	0.0015841	7.103	0.638083	0.725488	3.79625	20023.1	K04G2.9	K04G2.9	[GO:0016020] CELLULAR_COMPONENT membrane (IEA) | [GO:0016021] CELLULAR_COMPONENT integral to membrane (IEA)	WBGene00010567	174732_s_at	0.46251	0.0001	8.1339	0.00013203	9.177	0.406648	0.695119	4.13253	238.661	B0222.9	B0222.9	[GO:0009055] MOLECULAR_FUNCTION electron carrier activity (IEA) | [GO:0016491] MOLECULAR_FUNCTION oxidoreductase activity (IEA) | [GO:0003824] MOLECULAR_FUNCTION catalytic activity (IEA) | [GO:0050660] MOLECULAR_FUNCTION FAD binding (IEA) | [GO:0004672] MOLECULAR_FUNCTION protein kinase activity (IEA) | [GO:0005524] MOLECULAR_FUNCTION ATP binding (IEA) | [GO:0006468] BIOLOGICAL_PROCESS protein am…	WBGene00015057
178144_s_at	0.64966	0.0003	7.2652	0.0024019	17.227	0.586261	0.793078	25.1755	335.78	F56D5.5	F56D5.5		WBGene00010149	174745_at	0.27286	0.0137	3.0825	0.027417	6.195	0.0587944	0.578913	4.34202	434.539	sym-2	ZK1067.6
178212_s_at	0.43829	0.0073	4.7089	0.013022	22.037	0.449479	0.693122	1.72776	297755	pqn-59	R119.4	[GO:0009792] BIOLOGICAL_PROCESS embryonic development ending in birth or egg hatching (IMP) | [GO:0002119] BIOLOGICAL_PROCESS nematode larval development (IMP) | [GO:0040007] BIOLOGICAL_PROCESS growth (IMP) | [GO:0040011] BIOLOGICAL_PROCESS locomotion (IMP) | [GO:0000003] BIOLOGICAL_PROCESS reproduction (IMP)	WBGene00004143	174747_s_at	0.36543	0.0012	3.2208	0.022989	9.244	0.198126	0.765162	1.9075	11995.9	Y34D9A.1	Y34D9A.1	[GO:0002119] BIOLOGICAL_PROCESS nematode larval development (IMP) | [GO:0040007] BIOLOGICAL_PROCESS growth (IMP) | [GO:0009792] BIOLOGICAL_PROCESS embryonic development ending in birth or egg hatching (IMP)	WBGene00021327
178251_s_at	0.50877	0.0025	3.9288	0.024225	16.582	0.415017	0.597896	4.25808	59136.9	sna-2	T13F2.7	[GO:0009792] BIOLOGICAL_PROCESS embryonic development ending in birth or egg hatching (IMP) | [GO:0040010] BIOLOGICAL_PROCESS positive regulation of growth rate (IMP) | [GO:0002119] BIOLOGICAL_PROCESS nematode larval development (IMP) | [GO:0040007] BIOLOGICAL_PROCESS growth (IMP) | [GO:0040035] BIOLOGICAL_PROCESS hermaphrodite genitalia development (IMP)	WBGene00011747	174766_at	0.40807	0.0013	3.5721	0.014818	2.755	0.38015	0.753772	4.4371	682.754	lev-10	Y105E8A.7	[GO:0043196] CELLULAR_COMPONENT varicosity (IDA) via [WBPaper00024414] Gally C et al. (2004) | [GO:0045202] CELLULAR_COMPONENT synapse (IDA) via [WBPaper00024414] Gally C et al. (2004) | [GO:0005509] MOLECULAR_FUNCTION calcium ion binding (IEA) | [GO:0016021] CELLULAR_COMPONENT integral to membrane (IEA)	WBGene00002977
178276_at	0.52453	0.004	4.8174	0.012	6.991	0.460844	0.712339	6.39169	31404.5	C07H4.1	C07H4.1	[GO:0016021] CELLULAR_COMPONENT integral to membrane (IEA)	WBGene00007421	174821_at	0.30471	0.0078	4.2046	0.0069251	8.468	0.213318	0.530437	5.6463	695.487	K07E3.1	K07E3.1
178282_at	0.54113	0.0042	6.4302	0.0039738	7.135	0.560935	0.802794	2.44188	205340	F07H5.5	F07H5.5			174862_at	0.26892	0.0093	3.5568	0.0151	18.383	0.232135	0.595083	3.68303	894.292	hlh-30	W02C12.3
178284_s_at	0.37294	0.0092	3.7226	0.028839	17.692	0.460168	0.771441	6.03183	1416.35	M01E5.6	M01E5.6	[GO:0003712] MOLECULAR_FUNCTION transcription cofactor activity (IEA) | [GO:0005515] MOLECULAR_FUNCTION protein binding (IEA) | [GO:0006355] BIOLOGICAL_PROCESS regulation of transcription, DNA-dependent (IEA)	WBGene00010808	174881_s_at	0.19631	0.0173	2.7266	0.043492	8.195	0.0565826	0.310403	2.24999	2295.22	C27A7.5	C27A7.5	[GO:0004067] MOLECULAR_FUNCTION asparaginase activity (IEA) | [GO:0006520] BIOLOGICAL_PROCESS amino acid metabolic process (IEA)	WBGene00007756
178353_s_at	0.35225	0.0199	3.6416	0.030925	19.277	0.412023	0.631422	2.87395	20913.9	R04D3.3	R04D3.3		WBGene00011011	174899_at	0.26895	0.0125	3.2974	0.02087	15.682	0.0652047	0.44885	2.66693	27873.4	let-92	F38H4.9
178364_at	0.61291	0.0011	6.6341	0.0035006	17.09	0.578273	0.788668	3.15826	6641.6	tbx-36	ZK829.5	[GO:0003700] MOLECULAR_FUNCTION transcription factor activity (IEA) | [GO:0005634] CELLULAR_COMPONENT nucleus (IEA) | [GO:0006355] BIOLOGICAL_PROCESS regulation of transcription, DNA-dependent (IEA)	WBGene00006555	174940_at	0.2912	0.0032	2.8501	0.037011	22.178	0.0703315	0.471414	8.76986	1419.56	F32A5.2	F32A5.2	[GO:0004601] MOLECULAR_FUNCTION peroxidase activity (IEA) | [GO:0006979] BIOLOGICAL_PROCESS response to oxidative stress (IEA) | [GO:0020037] MOLECULAR_FUNCTION heme binding (IEA) | [GO:0004623] MOLECULAR_FUNCTION phospholipase A2 activity (IEA) | [GO:0006644] BIOLOGICAL_PROCESS phospholipid metabolic process (IEA) | [GO:0016042] BIOLOGICAL_PROCESS lipid catabolic process (IEA)	WBGene00017968
178412_at	0.57759	0.0018	6.6604	0.0034446	7.736	0.612362	0.763169	6.32378	15267.6	R02D5.3	R02D5.3	[GO:0016021] CELLULAR_COMPONENT integral to membrane (IEA)	WBGene00010977	174988_at	0.252	0.0164	3.154	0.025026	11.511	0.284164	0.865684	2.031	32670.3	rab-14	K09A9.2
178448_at	0.52661	0.0014	6.5405	0.0037092	8.495	0.565611	0.769673	6.68808	141.663	rpl-24.2	C03D6.8	[GO:0003735] MOLECULAR_FUNCTION structural constituent of ribosome (IEA) | [GO:0005622] CELLULAR_COMPONENT intracellular (IEA) | [GO:0005840] CELLULAR_COMPONENT ribosome (IEA) | [GO:0006412] BIOLOGICAL_PROCESS translation (IEA) | [GO:0040010] BIOLOGICAL_PROCESS positive regulation of growth rate (IMP) | [GO:0002119] BIOLOGICAL_PROCESS nematode larval development (IMP) | [GO:0040007] BIOLOGICAL_PR…	WBGene00004437178448_at	174995_s_at	0.37935	0	6.7504	0.00046598	6.685	0.240656	0.759752	2.60477	14.5752	ptr-6	C54A12.1	[GO:0016021] CELLULAR_COMPONENT integral to membrane (IEA) | [GO:0008158] MOLECULAR_FUNCTION hedgehog receptor activity (IEA) | [GO:0016020] CELLULAR_COMPONENT membrane (IEA) | [GO:0009792] BIOLOGICAL_PROCESS embryonic development ending in birth or egg hatching (IMP) | [GO:0018996] BIOLOGICAL_PROCESS molting cycle, collagen and cuticulin-based cuticle (IMP) | [GO:0040018] BIOLOGICAL_PROCESS posi…	WBGene00004221
178458_at	0.43281	0.0006	6.1932	0.0046199	10.214	0.549207	0.72082	4.21249	148.091	fbxa-167	C31C9.3		WBGene00007837	175000_at	0.36069	0.0016	5.8324	0.0011591	4.546	0.429699	0.796326	6.75222	6201.25	F32B5.6	F32B5.6
178486_s_at	0.34167	0.0067	3.2409	0.044157	17.106	0.287548	0.483399	3.9221	35627.8	F25B3.6	F25B3.6	[GO:0003677] MOLECULAR_FUNCTION DNA binding (IEA) | [GO:0005634] CELLULAR_COMPONENT nucleus (IEA) | [GO:0006352] BIOLOGICAL_PROCESS transcription initiation (IEA) | [GO:0016570] BIOLOGICAL_PROCESS histone modification (IEA) | [GO:0040010] BIOLOGICAL_PROCESS positive regulation of growth rate (IMP) | [GO:0009792] BIOLOGICAL_PROCESS embryonic development ending in birth or egg hatching (IMP) | [GO:…	WBGene00009103	175011_at	0.41702	0.0008	10.7017	1.7e-05	5.357	0.597534	0.71128	3.13519	440528	K07C11.7	K07C11.7	[GO:0016787] MOLECULAR_FUNCTION hydrolase activity (IEA)	WBGene00019479
178502_at	0.33989	0.0072	3.3201	0.041094	7.784	0.465164	0.733425	4.58183	25913.9	C14A4.6	C14A4.6	[GO:0016021] CELLULAR_COMPONENT integral to membrane (IEA)	WBGene00007557	175039_at	0.73899	0	14.9461	1.05e-06	7.356	0.721053	0.884996	3.05807	140263	dnj-13	F54D5.8
178503_at	0.51062	0.006	4.9079	0.011218	6.368	0.485567	0.749067	4.86239	54371.2	W02D9.6	W02D9.6		WBGene00012212	175046_s_at	0.2954	0.0029	3.2241	0.022893	15.687	0.328602	0.769375	4.11068	11762	---	---
178590_at	0.61049	0.0003	9.3271	0.00080695	19.667	0.682048	0.780625	1.87143	35589.4	T01C3.9	T01C3.9		WBGene00011324	175047_at	0.34679	0.0007	3.0782	0.027568	7.719	0.263868	0.769156	6.74219	1423.11	unc-23	H14N18.1
178593_at	0.50172	0.0071	3.7254	0.02877	17.415	0.409499	0.610963	2.5317	3865.48	F32A7.4	F32A7.4	[GO:0009792] BIOLOGICAL_PROCESS embryonic development ending in birth or egg hatching (IMP)	WBGene00009305	175077_s_at	0.19783	0.0128	4.415	0.0054231	9.528	0.34336	0.570879	3.50482	121831	C05D12.3	C05D12.3		WBGene00014666
178704_s_at	0.57286	0.0002	5.2	0.009067	6.532	0.524769	0.745325	2.33425	2761.73	cki-1	T05A6.1	[GO:0004861] MOLECULAR_FUNCTION cyclin-dependent protein kinase inhibitor activity (IEA) | [GO:0005634] CELLULAR_COMPONENT nucleus (IEA) | [GO:0007050] BIOLOGICAL_PROCESS cell cycle arrest (IEA) | [GO:0009792] BIOLOGICAL_PROCESS embryonic development ending in birth or egg hatching (IMP) | [GO:0018991] BIOLOGICAL_PROCESS oviposition (IMP) | [GO:0010171] BIOLOGICAL_PROCESS body morphogenesis (IMP)…	WBGene00000516	175089_at	0.37336	0.0021	3.2613	0.02184	5.026	0.182862	0.6274	2.07837	4110.45	Y71H2AM.1	Y71H2AM.1
178748_at	0.42935	0.0037	4.4015	0.016514	17.845	0.46201	0.73018	7.35766	277.829	F14B6.3	F14B6.3		WBGene00008784	175093_at	0.47649	0	5.5664	0.001528	6.539	0.238746	0.619485	4.38186	156.695	C26B9.7	C26B9.7		WBGene00016136
178782_at	0.57236	0.0002	6.1125	0.0048673	15.961	0.573185	0.630834	2.78302	2115.14	D1081.6	D1081.6		WBGene00008384	175102_at	0.26015	0.0105	5.4948	0.0016478	3.791	0.419618	0.683501	2.10201	233248	C04H5.7	C04H5.7		WBGene00007315
178785_s_at	0.4164	0.0132	4.435	0.016086	19.458	0.416052	0.576547	1.70844	1409.29	W09H1.3	W09H1.3		WBGene00012373	175106_at	0.55819	0	7.3516	0.00026525	7.944	0.459236	0.519266	3.12047	9621.34	F44E2.9	F44E2.9		WBGene00018422
178786_s_at	0.43728	0.0107	5.4781	0.0074513	20.745	0.540192	0.583272	1.92653	263718	D1081.7	D1081.7		WBGene00008385	175112_s_at	0.42178	0	6.4466	0.00062559	3.823	0.458314	0.889155	5.64363	5923.15	Y119D3B.13	Y119D3B.13		WBGene00022490
178794_at	0.42115	0.0114	3.4715	0.035892	7.334	0.294268	0.752295	7.72974	67991.6	M04D5.3	M04D5.3	[GO:0016021] CELLULAR_COMPONENT integral to membrane (IEA)	WBGene00077770	175115_at	0.28619	0.0051	4.2155	0.0068372	3.153	0.264515	0.904988	128.14	862.725	Y64H9A.2	Y64H9A.2	[GO:0016021] CELLULAR_COMPONENT integral to membrane (IEA)	WBGene00022024
178821_at	0.50224	0.0019	3.4079	0.037979	17.384	0.374665	0.409497	2.51994	4181.8	hst-2	C34F6.4	[GO:0040018] BIOLOGICAL_PROCESS positive regulation of multicellular organism growth (IMP) via [WBPaper00029002] Gumienny TL et al. (2007) | [GO:0040018] BIOLOGICAL_PROCESS positive regulation of multicellular organism growth (IGI) via [WBPaper00029002] Gumienny TL et al. (2007) | [GO:0016021] CELLULAR_COMPONENT integral to membrane (IEA) | [GO:0018991] BIOLOGICAL_PROCESS oviposition (IMP)	WBGene00002029	175124_at	0.33895	0.0001	8.2167	0.00012291	8.687	0.58649	0.68979	2.6034	5251.3	Y66D12A.24	Y66D12A.24	[GO:0016021] CELLULAR_COMPONENT integral to membrane (IEA)	WBGene00013448
178833_s_at	0.58256	0.0018	4.5423	0.014795	17.12	0.45265	0.582415	3.09571	103792	T12G3.6	T12G3.6		WBGene00011741	175142_at	0.61256	0	7.821	0.00017372	7.598	0.581591	0.789175	4.81219	2246.83	F17C11.12	F17C11.12	[GO:0005215] MOLECULAR_FUNCTION transporter activity (IEA) | [GO:0006810] BIOLOGICAL_PROCESS transport (IEA) | [GO:0016021] CELLULAR_COMPONENT integral to membrane (IEA)	WBGene00008923
178841_at	0.59802	0.0012	4.0664	0.021617	17.402	0.464733	0.644285	4.85319	174.802	T22G5.3	T22G5.3		WBGene00011930	175143_s_at	0.68617	0	14.6585	1.25e-06	22.896	0.752903	0.927669	16.0963	504318	R06C1.4	R06C1.4	[GO:0003676] MOLECULAR_FUNCTION nucleic acid binding (IEA) | [GO:0000166] MOLECULAR_FUNCTION nucleotide binding (IEA)	WBGene00011059
178887_at	0.41806	0.0096	3.256	0.043552	19.226	0.302033	0.514594	2.17726	1572.46	B0019.2	B0019.2	[GO:0003677] MOLECULAR_FUNCTION DNA binding (IEA) | [GO:0045449] BIOLOGICAL_PROCESS regulation of transcription (IEA)	WBGene00007094	175154_s_at	0.27674	0.0107	2.9987	0.030531	9.29	0.0776865	0.547797	2.48611	11608.9	C11D2.4	C11D2.4		WBGene00015702
179048_at	0.43931	0.0119	3.7955	0.027101	6.314	0.395288	0.554979	2.23615	692.915	ZK795.1	ZK795.1	[GO:0008440] MOLECULAR_FUNCTION inositol trisphosphate 3-kinase activity (IEA)	WBGene00014081	175158_s_at	0.34069	0.0001	3.5645	0.014957	8.684	0.352166	0.74886	3.17727	60.7993	T12A7.6	T12A7.6		WBGene00011727
179062_s_at	0.36056	0.0061	6.066	0.0050167	19.369	0.61362	0.93235	2.32013	15410.1	F14D7.2	F14D7.2	[GO:0002009] BIOLOGICAL_PROCESS morphogenesis of an epithelium (IMP)	WBGene00008789	175180_s_at	0.38099	0.0006	5.3183	0.0019879	16.917	0.366441	0.600176	4.14898	569.768	obr-3	ZK1086.1	[GO:0007179] BIOLOGICAL_PROCESS transforming growth factor beta receptor signaling pathway (IMP) via [WBPaper00004823] Sugawara K et al. (2001) | [GO:0040014] BIOLOGICAL_PROCESS regulation of multicellular organism growth (IMP) via [WBPaper00004823] Sugawara K et al. (2001) | [GO:0005515] MOLECULAR_FUNCTION protein binding (IDA) via [WBPaper00004823] Sugawara K et al. (2001) | [GO:0008202] BIOLOG…	WBGene00014215
179066_at	0.54168	0.0015	3.7363	0.028504	17.847	0.394952	0.556684	3.05462	1442.17	atg-4.2	ZK792.8		WBGene00014080	175182_at	0.28276	0.0069	2.8563	0.036715	21.804	0.14593	0.665687	2.66618	3519.73	nhr-97	H27C11.1
179086_s_at	0.49433	0.0005	10.6776	0.00043347	7.373	0.717714	0.812775	3.54912	20183.2	B0379.1	B0379.1		WBGene00007155	175189_at	0.38553	0.0007	6.5746	0.00055215	5.367	0.581117	0.850583	2.45854	245.686	dyf-8	C43C3.3
179204_s_at	0.57353	0.0029	4.4017	0.016512	6.844	0.45367	0.707142	7.14161	9196.87	T27F2.4	T27F2.4	[GO:0040015] BIOLOGICAL_PROCESS negative regulation of multicellular organism growth (IMP)	WBGene00012101	175207_at	0.40754	0.0005	6.2039	0.00079542	18.178	0.314573	0.717887	4.105	1122.54	obr-3	ZK1086.1	[GO:0007179] BIOLOGICAL_PROCESS transforming growth factor beta receptor signaling pathway (IMP) via [WBPaper00004823] Sugawara K et al. (2001) | [GO:0040014] BIOLOGICAL_PROCESS regulation of multicellular organism growth (IMP) via [WBPaper00004823] Sugawara K et al. (2001) | [GO:0005515] MOLECULAR_FUNCTION protein binding (IDA) via [WBPaper00004823] Sugawara K et al. (2001) | [GO:0008202] BIOLOG…	WBGene00014215
179210_at	0.58022	0.0019	5.0167	0.010354	4.783	0.474997	0.607519	5.59231	65.6715	T05F1.9	T05F1.9		WBGene00011494	175209_at	0.27712	0.0035	2.9711	0.03164	23.916	0.0899242	0.416355	5.10201	106.784	mrp-6	F20B6.3
179272_at	0.50108	0.0055	3.3563	0.039774	8.754	0.418984	0.558717	3.68712	121348	C06B3.6	C06B3.6		WBGene00007365	175229_at	0.33082	0.0034	3.2352	0.022573	7.179	0.171221	0.477265	6.71293	23926.7	C08F11.13	C08F11.13	[GO:0016021] CELLULAR_COMPONENT integral to membrane (IEA)	WBGene00007460
179284_at	0.6647	0.0003	6.3627	0.0041465	18.512	0.583269	0.691424	3.21314	1029.82	T28C6.3	T28C6.3	[GO:0016021] CELLULAR_COMPONENT integral to membrane (IEA)	WBGene00012119	175235_at	0.74736	0	17.0292	3.3e-07	7.721	0.70858	0.866188	14.1366	3677.77	clec-57	F08H9.6	[GO:0005488] MOLECULAR_FUNCTION binding (IEA)	WBGene00008594
179287_s_at	0.51169	0.0036	8.4525	0.0012519	19.03	0.655874	0.852121	2.44014	13707.5	pash-1	T22A3.5	[GO:0031053] BIOLOGICAL_PROCESS primary microRNA processing (IMP) via [WBPaper00024573] Denli AM et al. (2004) | [GO:0040034] BIOLOGICAL_PROCESS regulation of development, heterochronic (IMP) via [WBPaper00024573] Denli AM et al. (2004) | [GO:0048815] BIOLOGICAL_PROCESS hermaphrodite genitalia morphogenesis (IMP) via [WBPaper00024573] Denli AM et al. (2004) | [GO:0002009] BIOLOGICAL_PROCESS morph…	WBGene00011908	175239_at	0.57188	0.0001	7.7353	0.00018747	8.211	0.413482	0.841635	13.0586	364394	F15E11.15	F15E11.15	[GO:0040010] BIOLOGICAL_PROCESS positive regulation of growth rate (IMP)	WBGene00017501
179385_s_at	0.54513	0.0026	3.3144	0.041307	17.006	0.392674	0.495789	18.7498	786.61	F14H3.3	F14H3.3		WBGene00008822	175271_s_at	0.39301	0.0005	3.7749	0.011562	8.775	0.314804	0.718769	2.84881	1320.23	F20D6.11	F20D6.11	[GO:0016491] MOLECULAR_FUNCTION oxidoreductase activity (IEA) | [GO:0005737] CELLULAR_COMPONENT cytoplasm (IEA) | [GO:0045454] BIOLOGICAL_PROCESS cell redox homeostasis (IEA) | [GO:0050660] MOLECULAR_FUNCTION FAD binding (IEA) | [GO:0009055] MOLECULAR_FUNCTION electron carrier activity (IEA) | [GO:0051537] MOLECULAR_FUNCTION 2 iron, 2 sulfur cluster binding (IEA) | [GO:0055114] BIOLOGICAL_PROCESS…	WBGene00017640
179411_at	0.56164	0.0011	4.4938	0.015363	16.974	0.444644	0.692164	3.02782	9997.69	F43G9.2	F43G9.2	[GO:0016998] BIOLOGICAL_PROCESS cell wall catabolic process (IEA) | [GO:0016021] CELLULAR_COMPONENT integral to membrane (IEA)	WBGene00009665	175290_at	0.23879	0.0183	3.6918	0.012792	0.488	0.306538	0.592407	3.06618	96.3015	C05D2.11	C05D2.11
179570_at	0.43785	0.0082	3.709	0.029178	6.723	0.328225	0.611657	8.84647	5632.32	F11E6.4	F11E6.4		WBGene00008708	175298_s_at	0.31482	0.0012	3.2301	0.022721	8.151	0.233117	0.634343	2.87583	17625	sfxn-5	C41C4.10	[GO:0006812] BIOLOGICAL_PROCESS cation transport (IEA) | [GO:0008324] MOLECULAR_FUNCTION cation transmembrane transporter activity (IEA) | [GO:0016020] CELLULAR_COMPONENT membrane (IEA) | [GO:0016021] CELLULAR_COMPONENT integral to membrane (IEA)	WBGene00044049
179572_at	0.51108	0.0065	5.0454	0.010139	6.168	0.491487	0.598102	2.41975	3436.61	C06H5.7	C06H5.7	[GO:0016021] CELLULAR_COMPONENT integral to membrane (IEA)	WBGene00007395	175304_at	0.29378	0.0076	3.1287	0.025848	11.172	0.208795	0.624216	2.64317	3294.58	F07H5.10	F07H5.10		WBGene00008561
179576_s_at	0.54667	0.0031	5.3221	0.0083125	19.306	0.547597	0.679304	1.79599	14303.8	ZK550.4	ZK550.4	[GO:0003702] MOLECULAR_FUNCTION RNA polymerase II transcription factor activity (IEA) | [GO:0005673] CELLULAR_COMPONENT transcription factor TFIIE complex (IEA) | [GO:0006367] BIOLOGICAL_PROCESS transcription initiation from RNA polymerase II promoter (IEA) | [GO:0002009] BIOLOGICAL_PROCESS morphogenesis of an epithelium (IMP) | [GO:0040010] BIOLOGICAL_PROCESS positive regulation of growth rate (…	WBGene00013998	175323_at	0.30035	0.0077	2.9046	0.03448	11.849	0.232979	0.631619	3.24497	1743.57	gld-3	T07F8.3	[GO:0042006] BIOLOGICAL_PROCESS masculinization of hermaphroditic germ-line (IMP) via [WBPaper00005566] Eckmann CR et al. (2002) | [GO:0009792] BIOLOGICAL_PROCESS embryonic development ending in birth or egg hatching (IMP) via [WBPaper00005566] Eckmann CR et al. (2002) | [GO:0002119] BIOLOGICAL_PROCESS nematode larval development (IMP) via [WBPaper00005566] Eckmann CR et al. (2002) | [GO:0042078]…	WBGene00001597
179591_at	0.61713	0.0004	5.2138	0.0089775	7.338	0.509594	0.688547	2.42731	91261.6	far-6	W02A2.2	[GO:0008289] MOLECULAR_FUNCTION lipid binding (IEA)	WBGene00001390	175344_at	0.38228	0.0008	3.9159	0.0097524	17.719	0.142251	0.826679	2.40609	10360.9	H37A05.1	H37A05.1
179609_at	0.4878	0.0021	4.5795	0.014377	7.294	0.575957	0.908401	3.54653	8361.17	ZK287.3	ZK287.3		WBGene00013964	175385_at	0.60401	0	9.2941	5.02e-05	6.822	0.681456	0.85583	4.0879	6637.16	---	---
179642_at	0.42507	0.0058	4.8925	0.011346	7.852	0.443144	0.739586	2.80317	50575.3	spp-16	F32D8.9		WBGene00005001	175386_at	0.39093	0.0011	3.3457	0.01964	8.672	0.278	0.506	5.98654	399.825	C06C3.4	C06C3.4		WBGene00007375
179644_at	0.45113	0.0026	3.8134	0.026694	17.322	0.467532	0.864686	4.48736	2129.59	F56A8.8	F56A8.8		WBGene00010142	175388_at	0.43608	0.0005	3.9624	0.0092249	10.471	0.376915	0.888576	2.74524	10746.3	set-17	T21B10.5
179656_at	0.46952	0.0069	3.3633	0.039525	7.201	0.256136	0.701915	4.04946	20.9345	F11E6.6	F11E6.6	[GO:0016021] CELLULAR_COMPONENT integral to membrane (IEA) | [GO:0009792] BIOLOGICAL_PROCESS embryonic development ending in birth or egg hatching (IMP)	WBGene00008709	175392_at	0.36386	0.0013	3.079	0.027543	10.894	0.163493	0.334685	3.23406	12144.4	F09E5.7	F09E5.7
179685_at	0.42641	0.0151	3.8108	0.026753	18.048	0.352102	0.811168	3.16562	2312.43	T12G3.7	T12G3.7	[GO:0016021] CELLULAR_COMPONENT integral to membrane (IEA)	WBGene00011742	175396_s_at	0.44855	0.0004	4.5482	0.0046553	9.866	0.203211	0.444212	2.66177	779.228	zip-4	Y44E3B.1	[GO:0003700] MOLECULAR_FUNCTION transcription factor activity (IEA) | [GO:0005634] CELLULAR_COMPONENT nucleus (IEA) | [GO:0006355] BIOLOGICAL_PROCESS regulation of transcription, DNA-dependent (IEA) | [GO:0043565] MOLECULAR_FUNCTION sequence-specific DNA binding (IEA) | [GO:0046983] MOLECULAR_FUNCTION protein dimerization activity (IEA)	WBGene00021552
179692_at	0.52547	0.0052	3.2511	0.043748	5.533	0.382393	0.741221	2.11832	86123.7	F20D1.3	F20D1.3		WBGene00008975	175398_s_at	0.76845	0	23.5082	1.59e-08	8.219	0.751111	0.93745	38.1519	924.218	dhs-4	T05F1.10	[GO:0008152] BIOLOGICAL_PROCESS metabolic process (IEA) | [GO:0016491] MOLECULAR_FUNCTION oxidoreductase activity (IEA) | [GO:0008667] MOLECULAR_FUNCTION 2,3-dihydro-2,3-dihydroxybenzoate dehydrogenase activity (IEA) | [GO:0009239] BIOLOGICAL_PROCESS enterobactin biosynthetic process (IEA) | [GO:0003824] MOLECULAR_FUNCTION catalytic activity (IEA) | [GO:0005488] MOLECULAR_FUNCTION binding (IEA)	WBGene00000968
179727_at	0.4624	0.0004	7.8566	0.0017213	8.218	0.613793	0.826422	3.80201	21197.4	Y43C5A.3	Y43C5A.3	[GO:0016021] CELLULAR_COMPONENT integral to membrane (IEA)	WBGene00012783	175405_s_at	0.42141	0.0008	4.0612	0.0082012	21.649	0.39491	0.903465	2.1678	1570.88	C15C7.7	C15C7.7		WBGene00015793
179736_at	0.56047	0.002	7.4719	0.0021335	17.508	0.594423	0.725814	3.69417	161.995	F19C7.3	F19C7.3		WBGene00017593	175412_at	0.78436	0	18.5565	1.5e-07	8.411	0.657771	0.87508	4.55283	4461.69	ceeh-1	K02F3.6	[GO:0003824] MOLECULAR_FUNCTION catalytic activity (IEA) | [GO:0016787] MOLECULAR_FUNCTION hydrolase activity (IEA) | [GO:0016021] CELLULAR_COMPONENT integral to membrane (IEA)	WBGene00019329
179767_s_at	0.48246	0.0075	3.7577	0.027987	18.012	0.377494	0.81243	2.27079	98180.4	T14G10.7	T14G10.7	[GO:0016021] CELLULAR_COMPONENT integral to membrane (IEA)	WBGene00011776	175424_at	0.41245	0	4.6869	0.0039782	6.784	0.441816	0.684967	13.4652	3967.4	C40H1.7	C40H1.7		WBGene00008042
179782_s_at	0.52707	0.0007	8.3101	0.0013489	6.733	0.646686	0.76061	2.52834	862.239	W01F3.1	W01F3.1		WBGene00012184	175433_at	0.46371	0.0001	6.0917	0.00089022	8.771	0.412042	0.554183	2.50374	2171.28	Y54G9A.7	Y54G9A.7	[GO:0009792] BIOLOGICAL_PROCESS embryonic development ending in birth or egg hatching (IMP)	WBGene00013210
179787_at	0.29537	0.015	5.362	0.0080813	7.087	0.516052	0.566438	2.85676	68778	H36L18.2	H36L18.2		WBGene00010424	175445_at	0.38214	0.0008	4.7231	0.0038191	9.149	0.430662	0.637057	5.72416	1949.92	T23G5.2	T23G5.2	[GO:0005215] MOLECULAR_FUNCTION transporter activity (IEA) | [GO:0005622] CELLULAR_COMPONENT intracellular (IEA) | [GO:0006810] BIOLOGICAL_PROCESS transport (IEA)	WBGene00011962
179798_s_at	0.38327	0.0113	5.1216	0.0095932	19.189	0.504895	0.656715	2.31367	15807	ztf-18	T24C4.7	[GO:0005622] CELLULAR_COMPONENT intracellular (IEA) | [GO:0008270] MOLECULAR_FUNCTION zinc ion binding (IEA) | [GO:0009792] BIOLOGICAL_PROCESS embryonic development ending in birth or egg hatching (IMP)	WBGene00020763	175462_s_at	0.34022	0.0007	3.7341	0.01215	14.391	0.331055	0.789278	5.91409	6697.34	gem-4	T12A7.1		WBGene00001577
179820_s_at	0.36928	0.0019	3.2239	0.044846	5.904	0.379226	0.676442	3.6338	2047.82	ZK1321.4	ZK1321.4	[GO:0005515] MOLECULAR_FUNCTION protein binding (IEA)	WBGene00014262	175473_at	0.3706	0.001	3.3539	0.019438	18.074	0.304851	0.549157	4.3981	953.608	npp-8	Y41D4B.19	[GO:0005643] CELLULAR_COMPONENT nuclear pore (IEA) | [GO:0006913] BIOLOGICAL_PROCESS nucleocytoplasmic transport (IEA) | [GO:0017056] MOLECULAR_FUNCTION structural constituent of nuclear pore (IEA) | [GO:0009792] BIOLOGICAL_PROCESS embryonic development ending in birth or egg hatching (IMP) | [GO:0040035] BIOLOGICAL_PROCESS hermaphrodite genitalia development (IMP) | [GO:0006997] BIOLOGICAL_PROCE…	WBGene00003794
179854_at	0.57572	0.0018	7.7848	0.0017907	7.721	0.630853	0.742836	3.81787	4087.8	fbxa-128	Y47D3A.2		WBGene00012923	175484_s_at	0.26655	0.0132	5.5502	0.0015544	15.873	0.343947	0.646933	2.54269	647.843	sec-15	C28G1.3	[GO:0000145] CELLULAR_COMPONENT exocyst (IEA) | [GO:0006904] BIOLOGICAL_PROCESS vesicle docking during exocytosis (IEA)	WBGene00016188
179886_at	0.41721	0.0153	3.9254	0.024293	18.124	0.404532	0.553808	2.6753	24308.2	unc-85	F10G7.3	[GO:0018991] BIOLOGICAL_PROCESS oviposition (IMP) via [WBPaper00000496] Horvitz HR et al. (1980) | [GO:0009791] BIOLOGICAL_PROCESS post-embryonic development (IMP) via [WBPaper00000496] Horvitz HR et al. (1980) | [GO:0005634] CELLULAR_COMPONENT nucleus (IDA) via [WBPaper00031891] Grigsby IF et al. (2008) | [GO:0005634] CELLULAR_COMPONENT nucleus (IEA) | [GO:0006333] BIOLOGICAL_PROCESS chromatin a…	WBGene00006817	175502_at	0.40262	0	3.7371	0.012105	5.465	0.229836	0.425099	4.69218	1406.36	F44D12.9	F44D12.9	[GO:0005337] MOLECULAR_FUNCTION nucleoside transmembrane transporter activity (IEA) | [GO:0006810] BIOLOGICAL_PROCESS transport (IEA) | [GO:0016020] CELLULAR_COMPONENT membrane (IEA) | [GO:0016021] CELLULAR_COMPONENT integral to membrane (IEA)	WBGene00009686
179898_s_at	0.30801	0.0114	4.7904	0.012245	19.877	0.497954	0.720573	2.04393	217183	mrg-1	Y37D8A.9	[GO:0007281] BIOLOGICAL_PROCESS germ cell development (IMP) via [WBPaper00028985] Takasaki T et al. (2007) | [GO:0009792] BIOLOGICAL_PROCESS embryonic development ending in birth or egg hatching (IMP) via [WBPaper00028985] Takasaki T et al. (2007) | [GO:0045944] BIOLOGICAL_PROCESS positive regulation of transcription from RNA polymerase II promoter (IGI) via [WBPaper00028985] Takasaki T et al. (2…	WBGene00003406	175507_at	0.23142	0.0181	2.887	0.035275	16.048	0.083643	0.520654	2.98314	35639.3	Y17G7B.20	Y17G7B.20
179927_at	0.41901	0.0131	3.3179	0.041174	6.416	0.356407	0.447892	2.94166	2174.17	T07D3.4	T07D3.4	[GO:0016021] CELLULAR_COMPONENT integral to membrane (IEA) | [GO:0009792] BIOLOGICAL_PROCESS embryonic development ending in birth or egg hatching (IMP)	WBGene00020307	175538_at	0.24144	0.0173	2.834	0.037794	21.946	0.134662	0.426899	2.20224	24.0484	C06B8.2	C06B8.2	[GO:0003824] MOLECULAR_FUNCTION catalytic activity (IEA) | [GO:0046872] MOLECULAR_FUNCTION metal ion binding (IEA) | [GO:0016021] CELLULAR_COMPONENT integral to membrane (IEA)	WBGene00007368
179967_s_at	0.49116	0.0018	3.1612	0.047503	18.286	0.214106	0.804273	3.43941	992.876	fbxb-41	M01D1.8	[GO:0040017] BIOLOGICAL_PROCESS positive regulation of locomotion (IMP) | [GO:0002119] BIOLOGICAL_PROCESS nematode larval development (IMP) | [GO:0040007] BIOLOGICAL_PROCESS growth (IMP) | [GO:0040018] BIOLOGICAL_PROCESS positive regulation of multicellular organism growth (IMP) | [GO:0040035] BIOLOGICAL_PROCESS hermaphrodite genitalia development (IMP) | [GO:0009792] BIOLOGICAL_PROCESS embryonic…	WBGene00019703	175541_at	0.22216	0.0085	2.8711	0.036011	8.072	0.18805	0.649806	2.63095	205.41	twk-18	C24A3.6
180019_at	0.50761	0.0009	4.3855	0.016724	18.006	0.476582	0.718066	1.88382	20.5172	fbxb-61	F55C9.10		WBGene00010106	175546_at	0.27862	0.0109	5.5904	0.0014901	12.502	0.331528	0.63366	2.73264	24.3853	R06C1.6	R06C1.6		WBGene00011060
180052_at	0.54114	0.0032	4.206	0.019297	6.461	0.453562	0.558525	4.5693	19126.8	C10B5.3	C10B5.3		WBGene00015671	175554_s_at	0.25029	0.0086	3.1719	0.024463	14.844	0.209297	0.793291	5.29477	1229.54	K02G10.3	K02G10.3	[GO:0016021] CELLULAR_COMPONENT integral to membrane (IEA)	WBGene00019345
180067_at	0.35247	0.0127	3.501	0.034968	20.714	0.315609	0.71318	1.99787	4783.95	C18E3.2	C18E3.2	[GO:0005634] CELLULAR_COMPONENT nucleus (IEA) | [GO:0009792] BIOLOGICAL_PROCESS embryonic development ending in birth or egg hatching (IMP) | [GO:0002119] BIOLOGICAL_PROCESS nematode larval development (IMP) | [GO:0040007] BIOLOGICAL_PROCESS growth (IMP) | [GO:0040011] BIOLOGICAL_PROCESS locomotion (IMP) | [GO:0040035] BIOLOGICAL_PROCESS hermaphrodite genitalia development (IMP) | [GO:0000003] BI…	WBGene00015971	175566_s_at	0.26121	0.0192	3.8853	0.010118	23.705	0.18631	0.36528	4.0557	3541.45	ugt-50	T07C5.1	[GO:0008152] BIOLOGICAL_PROCESS metabolic process (IEA) | [GO:0016758] MOLECULAR_FUNCTION transferase activity, transferring hexosyl groups (IEA) | [GO:0016021] CELLULAR_COMPONENT integral to membrane (IEA)	WBGene00011564
180075_s_at	0.47666	0.0093	8.4341	0.001264	0.907	0.665384	0.754343	1.79387	35.226	W05F2.4	W05F2.4	[GO:0040035] BIOLOGICAL_PROCESS hermaphrodite genitalia development (IMP) | [GO:0002119] BIOLOGICAL_PROCESS nematode larval development (IMP) | [GO:0040007] BIOLOGICAL_PROCESS growth (IMP) | [GO:0040018] BIOLOGICAL_PROCESS positive regulation of multicellular organism growth (IMP)	WBGene00021036	175569_at	0.29412	0.0057	3.3321	0.019977	13.519	0.127821	0.620535	3.36564	75.8428	spe-6	Y66D12A.20	[GO:0004672] MOLECULAR_FUNCTION protein kinase activity (IEA) | [GO:0005524] MOLECULAR_FUNCTION ATP binding (IEA) | [GO:0006468] BIOLOGICAL_PROCESS protein amino acid phosphorylation (IEA) | [GO:0004674] MOLECULAR_FUNCTION protein serine/threonine kinase activity (IEA)	WBGene00004960
180086_at	0.41883	0.0084	6.1582	0.0047253	19.956	0.515843	0.810589	3.07858	1686.78	abf-1	C50F2.9		WBGene00000012180086_at	175591_s_at	0.33372	0.0035	3.4545	0.017143	2.134	0.263052	0.681547	5.65545	19972.8	C24B9.3	C24B9.3		WBGene00016048
180137_s_at	0.45551	0.0053	3.2319	0.044519	18.672	0.331814	0.421178	2.03394	38135.6	knl-3	T10B5.6	[GO:0051382] BIOLOGICAL_PROCESS kinetochore assembly (IMP) via [WBPaper00024437] Cheeseman IM et al. (2004) | [GO:0000778] CELLULAR_COMPONENT condensed nuclear chromosome kinetochore (IDA) via [WBPaper00024437] Cheeseman IM et al. (2004) | [GO:0009792] BIOLOGICAL_PROCESS embryonic development ending in birth or egg hatching (IMP) | [GO:0000910] BIOLOGICAL_PROCESS cytokinesis (IMP) | [GO:0051301] …	WBGene00020392	175610_at	0.34942	0.0029	3.9863	0.0089651	9.868	0.296851	0.713864	2.47546	89470.2	sel-1	F45D3.5	[GO:0045746] BIOLOGICAL_PROCESS negative regulation of Notch signaling pathway (IGI) via [WBPaper00001828] Sundaram MV et al. (1993) | [GO:0016023] CELLULAR_COMPONENT cytoplasmic membrane-bounded vesicle (IDA) via [WBPaper00002660] Grant BD et al. (1997) | [GO:0005488] MOLECULAR_FUNCTION binding (IEA) | [GO:0016021] CELLULAR_COMPONENT integral to membrane (IEA)	WBGene00004759
180192_at	0.68244	0.0002	7.6945	0.0018825	9.182	0.645962	0.677303	4.21642	4187.87	C49G7.5	C49G7.5		WBGene00016783	175622_at	0.30188	0.0063	3.0284	0.029387	23.374	0.0816804	0.785867	4.11784	152.882	flr-4	F09B12.6	[GO:0030421] BIOLOGICAL_PROCESS defecation (IMP) via [WBPaper00002315] Iwasaki K et al. (1995) | [GO:0042221] BIOLOGICAL_PROCESS response to chemical stimulus (IMP) via [WBPaper00001854] Katsura I et al. (1994) | [GO:0040007] BIOLOGICAL_PROCESS growth (IMP) via [WBPaper00001854] Katsura I et al. (1994) | [GO:0006468] BIOLOGICAL_PROCESS protein amino acid phosphorylation (ISS) via [WBPaper00022748…	WBGene00001468
180261_s_at	0.48744	0.0056	3.4478	0.036654	7.114	0.415098	0.554007	3.48731	24895	F52E4.5	F52E4.5		WBGene00018702	175627_s_at	0.24493	0.0126	3.2837	0.021232	8.524	0.422055	0.667099	3.49974	10846	gly-5	Y39E4B.12
180269_at	0.41003	0.0004	3.6751	0.030042	9.277	0.456038	0.603721	2.25984	1.44956e+06	C35B1.5	C35B1.5		WBGene00016435	175631_s_at	0.38233	0.0019	3.4119	0.018078	12.456	0.30413	0.730203	5.08465	875.863	mom-1	T07H6.2	[GO:0001714] BIOLOGICAL_PROCESS endodermal cell fate specification (IMP) via [WBPaper00002870] Thorpe CJ et al. (1997) | [GO:0000132] BIOLOGICAL_PROCESS establishment of mitotic spindle orientation (IMP) via [WBPaper00002870] Thorpe CJ et al. (1997) | [GO:0009792] BIOLOGICAL_PROCESS embryonic development ending in birth or egg hatching (IMP) via [WBPaper00002871] Rocheleau CE et al. (1997) | [GO:…	WBGene00003394
180355_at	0.61201	0.0007	8.9938	0.00095045	20.683	0.683877	0.835604	1.72085	21451	C55C3.5	C55C3.5	[GO:0009792] BIOLOGICAL_PROCESS embryonic development ending in birth or egg hatching (IMP) | [GO:0048477] BIOLOGICAL_PROCESS oogenesis (IMP)	WBGene00016955	175645_s_at	0.32671	0.0052	4.3216	0.0060413	18.335	0.376998	0.625992	21.4659	2961.8	ars-2	F28H1.3	[GO:0004813] MOLECULAR_FUNCTION alanine-tRNA ligase activity (IEA) | [GO:0005524] MOLECULAR_FUNCTION ATP binding (IEA) | [GO:0005737] CELLULAR_COMPONENT cytoplasm (IEA) | [GO:0006412] BIOLOGICAL_PROCESS translation (IEA) | [GO:0006419] BIOLOGICAL_PROCESS alanyl-tRNA aminoacylation (IEA) | [GO:0040010] BIOLOGICAL_PROCESS positive regulation of growth rate (IMP) | [GO:0009792] BIOLOGICAL_PROCESS em…	WBGene00000197
180369_at	0.53972	0.0004	10.9269	0.00038905	20.138	0.735381	0.859343	2.97567	34199.1	C17E7.4	C17E7.4	[GO:0009792] BIOLOGICAL_PROCESS embryonic development ending in birth or egg hatching (IMP)	WBGene00015899	175685_s_at	0.25177	0.0083	3.0059	0.030252	1.52	0.24218	0.762772	2.75639	113226	vha-11	Y38F2AL.3	[GO:0043229] CELLULAR_COMPONENT intracellular organelle (IDA) via [WBPaper00004341] Oka T et al. (2000) | [GO:0005524] MOLECULAR_FUNCTION ATP binding (IEA) | [GO:0016469] CELLULAR_COMPONENT proton-transporting two-sector ATPase complex (IEA) | [GO:0016820] MOLECULAR_FUNCTION hydrolase activity, acting on acid anhydrides, catalyzing transmembrane movement of substances (IEA) | [GO:0040010] BIOLOGI…	WBGene00006920
180377_at	0.46613	0.002	4.2319	0.018898	5.494	0.506032	0.641133	3.75234	5127.85	inx-17	R12E2.4	[GO:0005921] CELLULAR_COMPONENT gap junction (IEA) | [GO:0016021] CELLULAR_COMPONENT integral to membrane (IEA)	WBGene00002139	175705_s_at	0.35291	0.0025	5.1275	0.0024425	19.839	0.39256	0.813183	6.51741	133876	lec-11	F38A5.3	[GO:0016936] MOLECULAR_FUNCTION galactoside binding (IDA) via [WBPaper00011877] Kasai K-I et al. (2000) | [GO:0005529] MOLECULAR_FUNCTION sugar binding (IEA)	WBGene00002274
180424_at	0.49224	0.0024	3.7156	0.029013	6.319	0.411909	0.537335	5.0152	46279.7	F15E6.3	F15E6.3	[GO:0000003] BIOLOGICAL_PROCESS reproduction (IMP)	WBGene00017484	175710_s_at	0.37763	0.0006	5.6633	0.0013807	20.347	0.359438	0.577107	2.56388	1.13944e+06	lec-8	R07B1.10	[GO:0005529] MOLECULAR_FUNCTION sugar binding (IEA)	WBGene00002271
180425_s_at	0.45121	0.0067	3.1335	0.048734	6.665	0.308167	0.499346	3.09551	33464.6	F15E6.3	F15E6.3	[GO:0000003] BIOLOGICAL_PROCESS reproduction (IMP)	WBGene00017484	175711_at	0.52107	0	6.7914	0.00044807	7.439	0.47252	0.884126	4.73766	483.441	mec-5	E03G2.3	[GO:0007638] BIOLOGICAL_PROCESS mechanosensory behavior (IMP) via [WBPaper00002379] Du H-P et al. (1996) | [GO:0009612] BIOLOGICAL_PROCESS response to mechanical stimulus (IMP) via [WBPaper00002379] Du H-P et al. (1996) | [GO:0005578] CELLULAR_COMPONENT proteinaceous extracellular matrix (IDA) via [WBPaper00002379] Du H-P et al. (1996) | [GO:0005201] MOLECULAR_FUNCTION extracellular matrix struct…	WBGene00003169
180426_at	0.57166	0.0027	4.2283	0.018954	16.706	0.405249	0.775627	2.4907	22449.7	W04C9.4	W04C9.4		WBGene00021026	175722_s_at	0.39376	0.0018	4.4683	0.0051008	9.764	0.447051	0.661063	3.45408	3488.02	sax-1	R11G1.4	[GO:0008360] BIOLOGICAL_PROCESS regulation of cell shape (IMP) via [WBPaper00004340] Zallen JA et al. (2000) | [GO:0031175] BIOLOGICAL_PROCESS neurite development (IMP) via [WBPaper00004340] Zallen JA et al. (2000) | [GO:0030308] BIOLOGICAL_PROCESS negative regulation of cell growth (IMP) via [WBPaper00004340] Zallen JA et al. (2000) | [GO:0007163] BIOLOGICAL_PROCESS establishment and/or maintena…	WBGene00004727
180497_at	0.51713	0.0012	4.5536	0.014667	5.335	0.399522	0.726667	1.96877	33.7238	nhr-120	C25B8.6	[GO:0003677] MOLECULAR_FUNCTION DNA binding (IEA) | [GO:0004879] MOLECULAR_FUNCTION ligand-dependent nuclear receptor activity (IEA) | [GO:0005634] CELLULAR_COMPONENT nucleus (IEA) | [GO:0006355] BIOLOGICAL_PROCESS regulation of transcription, DNA-dependent (IEA) | [GO:0003700] MOLECULAR_FUNCTION transcription factor activity (IEA) | [GO:0003707] MOLECULAR_FUNCTION steroid hormone receptor activi…	WBGene00003710	175764_s_at	0.51729	0	7.7142	0.00019104	14.658	0.503138	0.708266	2.7908	59.6982	clh-3	E04F6.11	[GO:0005886] CELLULAR_COMPONENT plasma membrane (IDA) via [WBPaper00006426] Denton J et al. (2004) | [GO:0005247] MOLECULAR_FUNCTION voltage-gated chloride channel activity (IEA) | [GO:0006821] BIOLOGICAL_PROCESS chloride transport (IEA) | [GO:0016020] CELLULAR_COMPONENT membrane (IEA) | [GO:0005216] MOLECULAR_FUNCTION ion channel activity (IEA) | [GO:0016021] CELLULAR_COMPONENT integral to membr…	WBGene00000530
180523_at	0.37155	0.0027	6.4692	0.0038779	8.156	0.577001	0.667324	3.76598	23328.8	F47B10.5	F47B10.5	[GO:0016021] CELLULAR_COMPONENT integral to membrane (IEA)	WBGene00009816	175790_at	0.25229	0.005	3.5351	0.01551	8.88	0.220448	0.688002	1.97105	1174.06	hpl-1	K08H2.6	[GO:0008406] BIOLOGICAL_PROCESS gonad development (IGI) via [WBPaper00028349] Schott S et al. (2006) | [GO:0045595] BIOLOGICAL_PROCESS regulation of cell differentiation (IGI) via [WBPaper00028349] Schott S et al. (2006) | [GO:0040027] BIOLOGICAL_PROCESS negative regulation of vulval development (IGI) via [WBPaper00028349] Schott S et al. (2006) | [GO:0002119] BIOLOGICAL_PROCESS nematode larval d…	WBGene00001995
180541_s_at	0.51021	0.0042	5.313	0.0083657	6.656	0.49836	0.703867	2.69364	69032.8	C24G6.6	C24G6.6	[GO:0009055] MOLECULAR_FUNCTION electron carrier activity (IEA) | [GO:0016491] MOLECULAR_FUNCTION oxidoreductase activity (IEA) | [GO:0003824] MOLECULAR_FUNCTION catalytic activity (IEA) | [GO:0005488] MOLECULAR_FUNCTION binding (IEA) | [GO:0008152] BIOLOGICAL_PROCESS metabolic process (IEA)	WBGene00016061	175795_at	0.33408	0.0024	5.4332	0.0017587	21.322	0.325973	0.730114	1.71821	339388	ZK484.1	ZK484.1	[GO:0004857] MOLECULAR_FUNCTION enzyme inhibitor activity (IEA) | [GO:0008073] MOLECULAR_FUNCTION ornithine decarboxylase inhibitor activity (IEA)	WBGene00022748
180544_s_at	0.40937	0.0135	3.2356	0.044371	8.768	0.283551	0.737744	5.00777	203.505	F42G2.4	F42G2.4			175796_s_at	0.39489	0.0009	5.4711	0.0016896	20.926	0.450626	0.684538	1.97527	438878	ZK484.1	ZK484.1	[GO:0004857] MOLECULAR_FUNCTION enzyme inhibitor activity (IEA) | [GO:0008073] MOLECULAR_FUNCTION ornithine decarboxylase inhibitor activity (IEA)	WBGene00022748
180605_s_at	0.45198	0.002	4.4436	0.015977	16.711	0.420853	0.612722	2.91048	76288.6	C39E9.11	C39E9.11	[GO:0009792] BIOLOGICAL_PROCESS embryonic development ending in birth or egg hatching (IMP) | [GO:0040011] BIOLOGICAL_PROCESS locomotion (IMP)	WBGene00008034	175815_at	0.32725	0.003	2.7894	0.04006	11.215	0.167298	0.788372	17.8794	85.1539	Y34F4.2	Y34F4.2	[GO:0016021] CELLULAR_COMPONENT integral to membrane (IEA)	WBGene00021337
180610_at	0.31946	0.0014	4.3486	0.017219	8.735	0.450403	0.553553	3.11059	8904.4	pes-23	F14B8.3	[GO:0005215] MOLECULAR_FUNCTION transporter activity (IEA) | [GO:0006810] BIOLOGICAL_PROCESS transport (IEA) | [GO:0016021] CELLULAR_COMPONENT integral to membrane (IEA)	WBGene00003987	175820_s_at	0.33898	0.0007	2.7503	0.042158	20.266	0.169141	0.502523	2.11984	26.7416	unc-43	K11E8.1	[GO:0040011] BIOLOGICAL_PROCESS locomotion (IMP) | [GO:0040018] BIOLOGICAL_PROCESS positive regulation of multicellular organism growth (IMP) | [GO:0040017] BIOLOGICAL_PROCESS positive regulation of locomotion (IMP) | [GO:0004672] MOLECULAR_FUNCTION protein kinase activity (IEA) | [GO:0005524] MOLECULAR_FUNCTION ATP binding (IEA) | [GO:0006468] BIOLOGICAL_PROCESS protein amino acid phosphorylatio…	WBGene00006779
180627_at	0.42887	0.005	3.4081	0.037971	8.046	0.302563	0.684136	3.74508	6518.17	K04F1.9	K04F1.9		WBGene00019388	175823_s_at	0.51408	0	8.2133	0.00012327	19.216	0.49918	0.667648	3.84569	11596.6	daf-16	R13H8.1
180628_at	0.51879	0.0017	4.9808	0.01063	7.628	0.489069	0.650752	2.39939	46494.9	C53B7.3	C53B7.3		WBGene00016894	175872_at	0.29848	0.0001	3.7362	0.012118	2.13	0.31621	0.821112	1.84318	226272	clec-150	R06B10.3	[GO:0005488] MOLECULAR_FUNCTION binding (IEA)	WBGene00019914
180654_at	0.56574	0.0025	4.5068	0.015208	17.145	0.465491	0.786155	4.37093	18364.4	eri-1	T07A9.5	[GO:0016246] BIOLOGICAL_PROCESS RNA interference (IMP) via [WBPaper00006382] Kennedy S et al. (2004) | [GO:0045132] BIOLOGICAL_PROCESS meiotic chromosome segregation (IMP) via [WBPaper00006382] Kennedy S et al. (2004) | [GO:0048609] BIOLOGICAL_PROCESS reproductive process in a multicellular organism (IMP) via [WBPaper00006382] Kennedy S et al. (2004) | [GO:0006401] BIOLOGICAL_PROCESS RNA cataboli…	WBGene00001332	175873_at	0.349	0.0018	3.5654	0.01494	21.429	0.290024	0.499697	5.01552	3984.04	Y34F4.1	Y34F4.1	[GO:0016021] CELLULAR_COMPONENT integral to membrane (IEA)	WBGene00021336
180681_at	0.5203	0.0004	4.7831	0.012313	17.918	0.56083	0.818642	10.9512	187.025	T22B2.1	T22B2.1	[GO:0005515] MOLECULAR_FUNCTION protein binding (IEA) | [GO:0008270] MOLECULAR_FUNCTION zinc ion binding (IEA)	WBGene00020665	175896_at	0.24539	0.0175	2.81	0.038995	15.42	0.0427519	0.292603	2.18189	216.651	gei-8	C14B9.6	[GO:0005515] MOLECULAR_FUNCTION protein binding (IPI) via [WBPaper00005194] Tsuboi D et al. (2002) | [GO:0003677] MOLECULAR_FUNCTION DNA binding (IEA)	WBGene00001565
180685_at	0.37522	0.0006	5.5076	0.0073005	7.7	0.542226	0.615425	2.57723	36990.1	C54E4.2	C54E4.2	[GO:0005509] MOLECULAR_FUNCTION calcium ion binding (IEA)	WBGene00016918	175898_at	0.38834	0.0001	9.504	4.24e-05	6.272	0.563567	0.843522	2.73553	294649	ZK105.1	ZK105.1		WBGene00022653
180698_s_at	0.42779	0.0062	4.4759	0.015579	6.82	0.442394	0.658856	4.19763	33776.2	inx-15	R12E2.9	[GO:0005921] CELLULAR_COMPONENT gap junction (IEA) | [GO:0016021] CELLULAR_COMPONENT integral to membrane (IEA)	WBGene00002137	175918_at	0.33393	0.0015	3.7475	0.011953	10.832	0.298292	0.676454	4.4723	12735.7	F41B4.3	F41B4.3	[GO:0016021] CELLULAR_COMPONENT integral to membrane (IEA)	WBGene00018259
180703_at	0.45898	0.0013	7.8659	0.0017125	9.203	0.64214	0.774553	1.93525	118687	ttr-6	T28B4.3		WBGene00020886	175943_at	0.24621	0.0144	3.0069	0.030214	20.852	0.228037	0.556307	2.75178	115.096	C02D5.2	C02D5.2	[GO:0016021] CELLULAR_COMPONENT integral to membrane (IEA)	WBGene00015336
180785_at	0.54704	0.0015	4.4508	0.015887	18.591	0.444903	0.634306	3.18206	244.18	F02H6.2	F02H6.2		WBGene00008535	175951_s_at	0.3716	0.0015	4.3793	0.0056509	18.427	0.359505	0.687124	2.86426	1573.03	tag-250	C29E4.5	[GO:0003676] MOLECULAR_FUNCTION nucleic acid binding (IEA)	WBGene00016203
180837_at	0.57174	0.0002	3.9319	0.024162	9.272	0.437494	0.596648	2.22308	26319.6	ttr-30	T08A9.2	[GO:0016021] CELLULAR_COMPONENT integral to membrane (IEA)	WBGene00020335	175962_s_at	0.25338	0.0182	4.7034	0.0039047	1.887	0.299338	0.548065	1.84456	528681	K12H4.7	K12H4.7	[GO:0006508] BIOLOGICAL_PROCESS proteolysis (IEA) | [GO:0008236] MOLECULAR_FUNCTION serine-type peptidase activity (IEA)	WBGene00019682
180852_at	0.39063	0.0119	5.4579	0.007557	8.833	0.54029	0.896726	1.77735	1890.38	F30A10.2	F30A10.2	[GO:0009792] BIOLOGICAL_PROCESS embryonic development ending in birth or egg hatching (IMP) | [GO:0002119] BIOLOGICAL_PROCESS nematode larval development (IMP) | [GO:0040007] BIOLOGICAL_PROCESS growth (IMP)	WBGene00009261180852_at	175993_at	0.68973	0	19.1335	1.13e-07	22.243	0.703325	0.891183	73.9621	12571.8	gsto-1	C29E4.7	[GO:0004364] MOLECULAR_FUNCTION glutathione transferase activity (IEA) | [GO:0005737] CELLULAR_COMPONENT cytoplasm (IEA) | [GO:0008152] BIOLOGICAL_PROCESS metabolic process (IEA) | [GO:0040010] BIOLOGICAL_PROCESS positive regulation of growth rate (IMP) | [GO:0009792] BIOLOGICAL_PROCESS embryonic development ending in birth or egg hatching (IMP) | [GO:0040011] BIOLOGICAL_PROCESS locomotion (IMP) …	WBGene00016204
180916_at	0.29641	0.0023	4.7195	0.012919	8.889	0.471696	0.618185	2.67638	24650.6	C09D4.2	C09D4.2		WBGene00015633	175995_at	0.655	0	13.2142	3.04e-06	4.667	0.642415	0.979356	4.91	8420.12	pcp-1	ZK112.1	[GO:0006508] BIOLOGICAL_PROCESS proteolysis (IEA) | [GO:0008236] MOLECULAR_FUNCTION serine-type peptidase activity (IEA)	WBGene00003956
180920_s_at	0.43315	0.0135	4.229	0.018943	6.128	0.379487	0.799578	3.66054	3762.78	ZK1037.6	ZK1037.6	[GO:0016021] CELLULAR_COMPONENT integral to membrane (IEA)	WBGene00014194	175997_s_at	0.35225	0.0007	3.9194	0.0097122	15.655	0.41017	0.621167	1.73	8035.86	Y105E8A.19	Y105E8A.19	[GO:0000166] MOLECULAR_FUNCTION nucleotide binding (IEA) | [GO:0004812] MOLECULAR_FUNCTION aminoacyl-tRNA ligase activity (IEA) | [GO:0005524] MOLECULAR_FUNCTION ATP binding (IEA) | [GO:0005737] CELLULAR_COMPONENT cytoplasm (IEA) | [GO:0006412] BIOLOGICAL_PROCESS translation (IEA) | [GO:0006418] BIOLOGICAL_PROCESS tRNA aminoacylation for protein translation (IEA) | [GO:0004831] MOLECULAR_FUNCTION…	WBGene00013677
180990_at	0.30883	0.0009	3.7099	0.029155	9.985	0.477667	0.702197	3.38247	17106.7	F14B8.4	F14B8.4	[GO:0016021] CELLULAR_COMPONENT integral to membrane (IEA) | [GO:0009792] BIOLOGICAL_PROCESS embryonic development ending in birth or egg hatching (IMP)	WBGene00017446	176007_at	0.24596	0.005	3.667	0.013188	0.938	0.108198	0.236508	2.96259	209.568	F25A2.1	F25A2.1		WBGene00017764
181014_at	0.44652	0.0147	6.1722	0.0046828	6.823	0.56163	0.870486	4.22008	8061.28	C39H7.4	C39H7.4	[GO:0016021] CELLULAR_COMPONENT integral to membrane (IEA)	WBGene00016542	176010_at	0.27564	0.007	4.3722	0.0056974	23.985	0.357065	0.533767	2.39977	41084.6	K12H4.3	K12H4.3	[GO:0002119] BIOLOGICAL_PROCESS nematode larval development (IMP) | [GO:0040007] BIOLOGICAL_PROCESS growth (IMP) | [GO:0040010] BIOLOGICAL_PROCESS positive regulation of growth rate (IMP) | [GO:0009792] BIOLOGICAL_PROCESS embryonic development ending in birth or egg hatching (IMP) | [GO:0000003] BIOLOGICAL_PROCESS reproduction (IMP) | [GO:0040035] BIOLOGICAL_PROCESS hermaphrodite genitalia develo…	WBGene00019678
181065_at	0.54477	0.0008	7.4985	0.0021016	6.868	0.632145	0.695795	4.85942	306.76	clc-3	ZK563.4	[GO:0016021] CELLULAR_COMPONENT integral to membrane (IEA)	WBGene00000524	176016_at	0.38874	0.0004	3.7236	0.012306	19.622	0.191433	0.533677	4.53298	434.505	nhr-203	M02H5.5	[GO:0003700] MOLECULAR_FUNCTION transcription factor activity (IEA) | [GO:0003707] MOLECULAR_FUNCTION steroid hormone receptor activity (IEA) | [GO:0005634] CELLULAR_COMPONENT nucleus (IEA) | [GO:0006355] BIOLOGICAL_PROCESS regulation of transcription, DNA-dependent (IEA) | [GO:0008270] MOLECULAR_FUNCTION zinc ion binding (IEA) | [GO:0043565] MOLECULAR_FUNCTION sequence-specific DNA binding (IEA)	WBGene00019743
181172_s_at	0.398	0.0172	3.5031	0.034904	6.857	0.384659	0.513142	3.70221	6185.72	C31H2.1	C31H2.1			176025_at	0.3765	0.0001	5.1503	0.0023828	4.047	0.427315	0.610883	2.75046	38976.6	D2007.1	D2007.1	[GO:0016021] CELLULAR_COMPONENT integral to membrane (IEA)	WBGene00017041
181216_s_at	0.55412	0.0018	3.7411	0.028387	6.342	0.394177	0.561013	2.42225	143116	Y53H1B.2	Y53H1B.2		WBGene00013181	176042_s_at	0.30123	0.0023	2.9529	0.032391	9.941	0.182817	0.388896	5.99097	503.549	Y41D4B.26	Y41D4B.26		WBGene00021525
181217_at	0.46583	0.0105	4.9181	0.011133	18.667	0.457043	0.672385	1.9365	11258.8	C31H1.8	C31H1.8	[GO:0009792] BIOLOGICAL_PROCESS embryonic development ending in birth or egg hatching (IMP)	WBGene00016291	176071_at	0.34068	0.0028	4.9265	0.0030447	17.814	0.391048	0.708168	16.73	1593.14	B0403.3	B0403.3		WBGene00015167
181220_at	0.44095	0.0035	4.8065	0.012098	7.82	0.461536	0.580545	2.76287	35662.2	C53B7.2	C53B7.2		WBGene00016893	176073_at	0.37613	0.0017	3.3122	0.020485	23.767	0.174597	0.367516	7.26981	118.188	ZK370.6	ZK370.6		WBGene00022720
181257_at	0.51815	0.0032	5.3453	0.008177	7.994	0.517925	0.784934	2.2455	928.81	F17C11.2	F17C11.2		WBGene00008914	176095_at	0.23765	0.016	2.928	0.033451	9.78	0.194917	0.654606	2.57434	18573.4	F09G8.3	F09G8.3	[GO:0003735] MOLECULAR_FUNCTION structural constituent of ribosome (IEA) | [GO:0005622] CELLULAR_COMPONENT intracellular (IEA) | [GO:0005840] CELLULAR_COMPONENT ribosome (IEA) | [GO:0006412] BIOLOGICAL_PROCESS translation (IEA) | [GO:0040010] BIOLOGICAL_PROCESS positive regulation of growth rate (IMP) | [GO:0009792] BIOLOGICAL_PROCESS embryonic development ending in birth or egg hatching (IMP) | …	WBGene00017319
181305_s_at	0.46093	0.0067	3.6421	0.030912	7.161	0.352452	0.752899	2.36752	334582	pmt-1	ZK622.3	[GO:0009792] BIOLOGICAL_PROCESS embryonic development ending in birth or egg hatching (IMP) | [GO:0002119] BIOLOGICAL_PROCESS nematode larval development (IMP) | [GO:0040007] BIOLOGICAL_PROCESS growth (IMP) | [GO:0040010] BIOLOGICAL_PROCESS positive regulation of growth rate (IMP) | [GO:0040017] BIOLOGICAL_PROCESS positive regulation of locomotion (IMP) | [GO:0040011] BIOLOGICAL_PROCESS locomotio…	WBGene00022781	176104_at	0.3808	0.0013	9.0614	6.05e-05	8.283	0.549842	0.64421	20.4253	531.55	Y41D4B.17	Y41D4B.17		WBGene00021519
181311_s_at	0.42954	0.0005	4.9911	0.01055	20.113	0.500605	0.55668	1.68522	149563	F49C12.9	F49C12.9		WBGene00009878	176107_at	0.31584	0.0028	4.6703	0.0040532	11.222	0.250729	0.48596	2.20788	26157.9	Y50D4A.2	Y50D4A.2	[GO:0016021] CELLULAR_COMPONENT integral to membrane (IEA)	WBGene00021736
181417_at	0.49361	0.0028	3.7957	0.027097	16.827	0.383276	0.716734	2.30711	33267.4	F18A1.8	F18A1.8		WBGene00017549	176131_at	0.51127	0	10.867	1.51e-05	3.66	0.604487	0.812311	5.48189	5959.72	Y119D3B.13	Y119D3B.13		WBGene00022490
181436_at	0.31091	0.004	3.6915	0.02962	8.872	0.341496	0.510771	2.44874	18317	F40A3.2	F40A3.2	[GO:0016021] CELLULAR_COMPONENT integral to membrane (IEA)	WBGene00018217	176141_s_at	0.2776	0.0107	2.6388	0.048818	12.361	0.0319014	0.545304	10.331	40305.9	Y58A7A.3	Y58A7A.3		WBGene00021977
181454_s_at	0.54663	0.0022	3.1177	0.049453	15.979	0.300702	0.736232	3.50464	40336.3	B0513.2	B0513.2	[GO:0009792] BIOLOGICAL_PROCESS embryonic development ending in birth or egg hatching (IMP)	WBGene00007195	176145_at	0.63726	0	9.7784	3.42e-05	23.033	0.592013	0.846853	3.49998	436830	K08D12.3	K08D12.3	[GO:0003676] MOLECULAR_FUNCTION nucleic acid binding (IEA) | [GO:0008270] MOLECULAR_FUNCTION zinc ion binding (IEA) | [GO:0000003] BIOLOGICAL_PROCESS reproduction (IMP) | [GO:0040011] BIOLOGICAL_PROCESS locomotion (IMP) | [GO:0009792] BIOLOGICAL_PROCESS embryonic development ending in birth or egg hatching (IMP) | [GO:0002119] BIOLOGICAL_PROCESS nematode larval development (IMP) | [GO:0040007] BI…	WBGene00019537
181478_s_at	0.30976	0.0158	4.0793	0.021389	19.268	0.406462	0.578136	3.58689	2364.52	F53B1.2	F53B1.2	[GO:0016021] CELLULAR_COMPONENT integral to membrane (IEA)	WBGene00018735	176183_at	0.23693	0.0037	2.7681	0.04119	11.524	0.361841	0.863093	3.36404	38.2425	Y69A2AR.25	Y69A2AR.25		WBGene00022096
181485_s_at	0.40687	0.0069	3.6247	0.03138	21.209	0.347481	0.474994	1.97284	12726.2	Y48B6A.1	Y48B6A.1	[GO:0005634] CELLULAR_COMPONENT nucleus (IEA) | [GO:0006364] BIOLOGICAL_PROCESS rRNA processing (IEA) | [GO:0040010] BIOLOGICAL_PROCESS positive regulation of growth rate (IMP) | [GO:0002119] BIOLOGICAL_PROCESS nematode larval development (IMP) | [GO:0040007] BIOLOGICAL_PROCESS growth (IMP) | [GO:0000003] BIOLOGICAL_PROCESS reproduction (IMP) | [GO:0040035] BIOLOGICAL_PROCESS hermaphrodite genita…	WBGene00012978	176190_at	0.3293	0.0007	3.44	0.017455	17.364	0.0879303	0.329153	1.61536	15.7943	Y92H12A.4	Y92H12A.4		WBGene00022360
181536_at	0.44365	0.0043	4.0608	0.021716	7.331	0.394736	0.624835	8.07909	3073.44	F52B11.5	F52B11.5		WBGene00009927	176203_at	0.31054	0.0039	2.7517	0.042084	10.325	0.169743	0.548469	4.18178	475.205	fbxa-79	Y82E9BL.13		WBGene00022329
181605_at	0.42505	0.011	5.3294	0.0082694	17.689	0.548136	0.861923	2.18967	20069.5	T02C12.3	T02C12.3	[GO:0040010] BIOLOGICAL_PROCESS positive regulation of growth rate (IMP)	WBGene00011368	176212_at	0.49978	0	6.2455	0.00076311	6.39	0.449101	0.634585	23.2955	1066.05	fbxa-78	Y119D3B.19		WBGene00022495
181611_at	0.40276	0.0198	3.269	0.043042	17.519	0.362612	0.441105	1.82329	1594.52	rgs-5	B0336.4	[GO:0004871] MOLECULAR_FUNCTION signal transducer activity (IEA)	WBGene00004348	176229_at	0.34785	0.001	3.1573	0.024922	0.328	0.287823	0.815366	2.40262	712.031	F42H10.3	F42H10.3	[GO:0008270] MOLECULAR_FUNCTION zinc ion binding (IEA)	WBGene00018367
181665_at	0.44167	0.0081	4.0223	0.022415	7.356	0.460534	0.736536	2.50559	11980	Y37D8A.6	Y37D8A.6	[GO:0016021] CELLULAR_COMPONENT integral to membrane (IEA)	WBGene00012548	176230_at	0.33682	0.0016	3.1746	0.024379	8.835	0.171257	0.70399	2.30868	2617.13	Y71H2AM.16	Y71H2AM.16	[GO:0003993] MOLECULAR_FUNCTION acid phosphatase activity (IEA)	WBGene00022181
181675_at	0.46093	0.0127	4.5604	0.01459	4.466	0.428679	0.775462	2.43798	72.8784	R03G5.6	R03G5.6		WBGene00019847	176235_at	0.33219	0.0031	3.3286	0.020066	7.698	0.162792	0.266788	3.97756	709.845	Y119C1B.10	Y119C1B.10		WBGene00022475
181681_at	0.43752	0.0146	3.4946	0.035166	7.338	0.340543	0.562665	39.7667	859.413	spp-13	F08F1.6	[GO:0016021] CELLULAR_COMPONENT integral to membrane (IEA)	WBGene00004998	176243_at	0.24593	0.0187	3.6056	0.014219	11.12	0.0917769	0.304665	1.74213	13392.7	ero-1	Y105E8B.8	[GO:0005515] MOLECULAR_FUNCTION protein binding (IEA) | [GO:0005789] CELLULAR_COMPONENT endoplasmic reticulum membrane (IEA) | [GO:0006467] BIOLOGICAL_PROCESS protein thiol-disulfide exchange (IEA) | [GO:0009055] MOLECULAR_FUNCTION electron carrier activity (IEA) | [GO:0016671] MOLECULAR_FUNCTION oxidoreductase activity, acting on sulfur group of donors, disulfide as acceptor (IEA) | [GO:0050660]…	WBGene00001334
181690_at	0.33449	0.0101	3.4218	0.037511	21.964	0.303843	0.614684	1.91313	58649.4	cee-1	F26F4.1	[GO:0040010] BIOLOGICAL_PROCESS positive regulation of growth rate (IMP) | [GO:0002119] BIOLOGICAL_PROCESS nematode larval development (IMP) | [GO:0009792] BIOLOGICAL_PROCESS embryonic development ending in birth or egg hatching (IMP)	WBGene00017825	176271_at	0.35231	0.002	3.2141	0.023186	21.958	0.214295	0.649078	5.40141	7843.5	C52D10.1	C52D10.1		WBGene00016875
181691_at	0.52786	0.0046	3.497	0.035092	16.245	0.373048	0.464996	3.38167	13146.8	C25H3.4	C25H3.4	[GO:0003743] MOLECULAR_FUNCTION translation initiation factor activity (IEA) | [GO:0006413] BIOLOGICAL_PROCESS translational initiation (IEA) | [GO:0003723] MOLECULAR_FUNCTION RNA binding (IEA)	WBGene00016113	176275_at	0.41787	0.0004	6.4245	0.00063927	17.313	0.444719	0.77057	2.38527	421.248	Y71H2AM.2	Y71H2AM.2	[GO:0005622] CELLULAR_COMPONENT intracellular (IEA) | [GO:0008270] MOLECULAR_FUNCTION zinc ion binding (IEA) | [GO:0016021] CELLULAR_COMPONENT integral to membrane (IEA)	WBGene00022167
181695_at	0.50195	0.0022	3.58	0.032626	8.29	0.376361	0.619547	6.41686	72681.3	C49G7.12	C49G7.12		WBGene00077593	176285_s_at	0.48494	0.0002	6.7806	0.00045272	20.701	0.423383	0.840721	2.29471	35580.9	Y71H2AM.13	Y71H2AM.13		WBGene00022178
181712_at	0.42045	0.0113	4.6186	0.013951	6.709	0.523824	0.771836	2.88009	406.827	C04G2.10	C04G2.10	[GO:0004672] MOLECULAR_FUNCTION protein kinase activity (IEA) | [GO:0005524] MOLECULAR_FUNCTION ATP binding (IEA) | [GO:0006468] BIOLOGICAL_PROCESS protein amino acid phosphorylation (IEA)	WBGene00007309	176295_at	0.38224	0.0015	3.4386	0.017484	15.929	0.0785516	0.758461	6.61477	426.969	fbxa-74	Y22D7AR.9		WBGene00021262
181721_at	0.52293	0.0039	3.9957	0.022915	18.54	0.442931	0.595555	3.32763	6583.84	C27C12.1	C27C12.1		WBGene00007771	176304_at	0.40158	0	6.4844	0.00060287	4.41	0.563418	0.79018	38.6651	2064.9	Y52E8A.3	Y52E8A.3	[GO:0016209] MOLECULAR_FUNCTION antioxidant activity (IEA) | [GO:0016491] MOLECULAR_FUNCTION oxidoreductase activity (IEA)	WBGene00021796
181768_s_at	0.43296	0.016	3.7244	0.028797	20.812	0.422736	0.496187	1.78283	6811.58	F29C4.6	F29C4.6		WBGene00017928	176349_s_at	0.63045	0	10.9748	1.39e-05	18.979	0.636953	0.794174	20.0116	641.988	T24E12.5	T24E12.5	[GO:0016021] CELLULAR_COMPONENT integral to membrane (IEA)	WBGene00020774
181805_at	0.31253	0.0138	4.4945	0.015355	6.159	0.462029	0.529193	2.9167	4192.7	Y48C3A.3	Y48C3A.3		WBGene00012987	176360_at	0.29143	0.0102	3.6686	0.013162	22.838	0.17891	0.43951	16.4739	401.331	R13A5.10	R13A5.10	[GO:0008270] MOLECULAR_FUNCTION zinc ion binding (IEA) | [GO:0016787] MOLECULAR_FUNCTION hydrolase activity (IEA)	WBGene00020052
181834_at	0.42149	0.0059	3.5972	0.03214	16.225	0.351838	0.679469	4.28897	9087.77	B0205.1	B0205.1	[GO:0009792] BIOLOGICAL_PROCESS embryonic development ending in birth or egg hatching (IMP)	WBGene00015017	176383_at	0.43151	0.0003	4.3559	0.005806	21.51	0.325333	0.524278	10.4616	5870.56	C52D10.1	C52D10.1		WBGene00016875
181843_s_at	0.39376	0.0187	4.0491	0.021927	17.592	0.453613	0.771569	3.11359	1639.8	K10D2.1	K10D2.1	[GO:0009792] BIOLOGICAL_PROCESS embryonic development ending in birth or egg hatching (IMP) | [GO:0040010] BIOLOGICAL_PROCESS positive regulation of growth rate (IMP)	WBGene00019627	176385_at	0.35636	0.0025	4.4643	0.0051239	15.065	0.217662	0.708332	3.98409	1507.44	eri-5	Y38F2AR.1		WBGene00021419
181895_s_at	0.58696	0.0014	6.5651	0.0036531	17.525	0.551615	0.793254	6.12949	19846.7	T06D10.2	T06D10.2	[GO:0009792] BIOLOGICAL_PROCESS embryonic development ending in birth or egg hatching (IMP)	WBGene00011532	176416_at	0.31271	0.0079	3.8976	0.0099696	17.58	0.158107	0.552582	3.01809	3859.45	C44B7.2	C44B7.2	[GO:0003676] MOLECULAR_FUNCTION nucleic acid binding (IEA) | [GO:0003723] MOLECULAR_FUNCTION RNA binding (IEA) | [GO:0005634] CELLULAR_COMPONENT nucleus (IEA) | [GO:0006397] BIOLOGICAL_PROCESS mRNA processing (IEA) | [GO:0000166] MOLECULAR_FUNCTION nucleotide binding (IEA)	WBGene00016624
181909_s_at	0.49839	0.0046	3.9164	0.024477	17.279	0.382908	0.722064	6.82267	15760.2	T10E9.2	T10E9.2		WBGene00020412	176422_at	0.42212	0.0007	4.4969	0.0049361	18.276	0.286092	0.647884	4.2964	390.295	C30F12.1	C30F12.1	[GO:0003676] MOLECULAR_FUNCTION nucleic acid binding (IEA) | [GO:0008270] MOLECULAR_FUNCTION zinc ion binding (IEA) | [GO:0002009] BIOLOGICAL_PROCESS morphogenesis of an epithelium (IMP) | [GO:0018991] BIOLOGICAL_PROCESS oviposition (IMP)	WBGene00016260
181941_s_at	0.48187	0.0044	3.3803	0.038928	6.648	0.351898	0.492799	3.07898	459199	F37C4.5	F37C4.5		WBGene00018145	176431_at	0.63002	0	12.7373	4.14e-06	21.636	0.660562	0.908404	9.78239	111.745	Y71G12B.3	Y71G12B.3	[GO:0016021] CELLULAR_COMPONENT integral to membrane (IEA)	WBGene00022143
181949_s_at	0.50636	0.0036	3.1895	0.046283	17.334	0.341341	0.457813	4.49216	32647.2	C34B2.5	C34B2.5	[GO:0005488] MOLECULAR_FUNCTION binding (IEA)	WBGene00016390	176446_s_at	0.53489	0	6.2839	0.00073454	20.082	0.510447	0.634707	2.10355	27233.4	Y39G10AR.8	Y39G10AR.8	[GO:0003924] MOLECULAR_FUNCTION GTPase activity (IEA) | [GO:0005525] MOLECULAR_FUNCTION GTP binding (IEA) | [GO:0009792] BIOLOGICAL_PROCESS embryonic development ending in birth or egg hatching (IMP) | [GO:0002119] BIOLOGICAL_PROCESS nematode larval development (IMP) | [GO:0040007] BIOLOGICAL_PROCESS growth (IMP) | [GO:0040018] BIOLOGICAL_PROCESS positive regulation of multicellular organism grow…	WBGene00021466
181981_at	0.52954	0.001	11.3857	0.00032044	18.262	0.737255	0.831944	4.35736	284.35	B0212.3	B0212.3	[GO:0005515] MOLECULAR_FUNCTION protein binding (IEA) | [GO:0009792] BIOLOGICAL_PROCESS embryonic development ending in birth or egg hatching (IMP)	WBGene00015037	176448_at	0.24366	0.0029	3.2137	0.023199	19.39	0.10167	0.574717	3.63863	413.228	Y102A11A.1	Y102A11A.1	[GO:0016021] CELLULAR_COMPONENT integral to membrane (IEA)	WBGene00022411
181982_s_at	0.43766	0.0014	6.3775	0.0041077	16.926	0.593409	0.735912	3.24162	3975.65	B0212.3	B0212.3	[GO:0005515] MOLECULAR_FUNCTION protein binding (IEA) | [GO:0009792] BIOLOGICAL_PROCESS embryonic development ending in birth or egg hatching (IMP)	WBGene00015037	176501_at	0.31388	0.0017	3.4387	0.017484	20.446	0.160526	0.656925	2.18428	23.5351	rbc-2	Y54F10AM.10		WBGene00004314
182038_at	0.5176	0.0018	4.4096	0.016409	18.279	0.479279	0.733535	5.21329	107.328	K09E3.5	K09E3.5		WBGene00019576	176505_at	0.60911	0	10.6223	1.8e-05	22.164	0.639519	0.761373	4.07095	99124.7	Y14H12A.1	Y14H12A.1	[GO:0016021] CELLULAR_COMPONENT integral to membrane (IEA)	WBGene00021190
182041_s_at	0.55	0.0034	5.85	0.0057848	18.388	0.580478	0.69391	1.81993	24319.4	T10H9.3	T10H9.3	[GO:0016021] CELLULAR_COMPONENT integral to membrane (IEA) | [GO:0040010] BIOLOGICAL_PROCESS positive regulation of growth rate (IMP) | [GO:0002119] BIOLOGICAL_PROCESS nematode larval development (IMP) | [GO:0040007] BIOLOGICAL_PROCESS growth (IMP) | [GO:0040011] BIOLOGICAL_PROCESS locomotion (IMP) | [GO:0000003] BIOLOGICAL_PROCESS reproduction (IMP)	WBGene00020425	176526_s_at	0.33466	0.0002	6.2315	0.00077386	19.48	0.431187	0.831522	1.50066	92.0741	Y39H10A.6	Y39H10A.6	[GO:0009792] BIOLOGICAL_PROCESS embryonic development ending in birth or egg hatching (IMP) | [GO:0000003] BIOLOGICAL_PROCESS reproduction (IMP)	WBGene00021482
182058_at	0.45708	0.0087	3.4817	0.035568	17.557	0.318476	0.540841	3.54125	103100	C27A2.1	C27A2.1	[GO:0005524] MOLECULAR_FUNCTION ATP binding (IEA) | [GO:0005694] CELLULAR_COMPONENT chromosome (IEA)	WBGene00016151	176529_at	0.23135	0.0015	3.1711	0.024489	6.159	0.138775	0.613134	3.05722	13.6621	smf-3	Y69A2AR.4	[GO:0005215] MOLECULAR_FUNCTION transporter activity (IEA) | [GO:0006810] BIOLOGICAL_PROCESS transport (IEA) | [GO:0016020] CELLULAR_COMPONENT membrane (IEA) | [GO:0016021] CELLULAR_COMPONENT integral to membrane (IEA) | [GO:0006950] BIOLOGICAL_PROCESS response to stress (IMP)	WBGene00004878
182078_at	0.36532	0.0085	5.5643	0.0070204	7.501	0.511638	0.670026	7.42561	2925.56	T10E9.8	T10E9.8	[GO:0016021] CELLULAR_COMPONENT integral to membrane (IEA)	WBGene00020418	176531_at	0.1763	0.0071	3.316	0.020387	21.756	0.303993	0.711628	4.00427	614.065	Y71D11A.3	Y71D11A.3	[GO:0003824] MOLECULAR_FUNCTION catalytic activity (IEA) | [GO:0008152] BIOLOGICAL_PROCESS metabolic process (IEA)	WBGene00022104
182089_at	0.49276	0.0046	4.6457	0.013664	17.368	0.436696	0.65308	3.04494	1578.54	nfya-2	Y53H1A.5	[GO:0003700] MOLECULAR_FUNCTION transcription factor activity (IEA) | [GO:0005634] CELLULAR_COMPONENT nucleus (IEA) | [GO:0006355] BIOLOGICAL_PROCESS regulation of transcription, DNA-dependent (IEA)	WBGene00043056	176540_s_at	0.39624	0.0004	4.3749	0.0056801	11.317	0.240236	0.532551	2.96214	2625.38	stim-1	Y55B1BM.1	[GO:0030425] CELLULAR_COMPONENT dendrite (IDA) via [WBPaper00028479] Yan X et al. (2006) | [GO:0043025] CELLULAR_COMPONENT cell soma (IDA) via [WBPaper00028479] Yan X et al. (2006) | [GO:0005886] CELLULAR_COMPONENT plasma membrane (IDA) via [WBPaper00028479] Yan X et al. (2006) | [GO:0005737] CELLULAR_COMPONENT cytoplasm (IDA) via [WBPaper00028479] Yan X et al. (2006) | [GO:0000003] BIOLOGICAL_PR…	WBGene00021910
182117_at	0.56318	0.0013	4.5175	0.015082	17.001	0.472125	0.667957	1.98738	13170.9	R05G6.4	R05G6.4		WBGene00019898	176564_at	0.46493	0.0001	5.5586	0.0015406	9.468	0.319433	0.632784	2.36579	10489.5	Y71G12B.6	Y71G12B.6	[GO:0003824] MOLECULAR_FUNCTION catalytic activity (IEA) | [GO:0044237] BIOLOGICAL_PROCESS cellular metabolic process (IEA) | [GO:0050662] MOLECULAR_FUNCTION coenzyme binding (IEA) | [GO:0005488] MOLECULAR_FUNCTION binding (IEA) | [GO:0008152] BIOLOGICAL_PROCESS metabolic process (IEA) | [GO:0009792] BIOLOGICAL_PROCESS embryonic development ending in birth or egg hatching (IMP)	WBGene00022146
182183_at	0.56248	0.0022	4.678	0.013332	17.307	0.486885	0.631575	4.80679	3706.41	rlbp-1	T23G11.5	[GO:0005622] CELLULAR_COMPONENT intracellular (IEA) | [GO:0007165] BIOLOGICAL_PROCESS signal transduction (IEA)	WBGene00011970	176572_at	0.40651	0.0009	5.0477	0.0026647	19.669	0.294956	0.889761	4.35124	1694.83	lig-4	C07H6.1	[GO:0006281] BIOLOGICAL_PROCESS DNA repair (IMP) via [WBPaper00028742] Morton J et al. (2006) | [GO:0006281] BIOLOGICAL_PROCESS DNA repair (IEA) | [GO:0005622] CELLULAR_COMPONENT intracellular (IEA) | [GO:0003910] MOLECULAR_FUNCTION DNA ligase (ATP) activity (IEA) | [GO:0005524] MOLECULAR_FUNCTION ATP binding (IEA) | [GO:0006260] BIOLOGICAL_PROCESS DNA replication (IEA) | [GO:0006310] BIOLOGICAL_…	WBGene00002986
182209_s_at	0.59077	0	5.5574	0.0070539	16.945	0.503548	0.668258	16.9186	3460.75	T05E7.5	T05E7.5		WBGene00020261	176574_at	0.24366	0.0033	3.1576	0.024913	4.345	0.210754	0.587971	3.67202	59.1233	rfs-1	C30A5.2		WBGene00004342
182260_at	0.71885	0	7.3083	0.0023428	18.814	0.640147	0.821989	1.74665	20920.1	C01F1.2	C01F1.2	[GO:0005215] MOLECULAR_FUNCTION transporter activity (IEA) | [GO:0005488] MOLECULAR_FUNCTION binding (IEA) | [GO:0006810] BIOLOGICAL_PROCESS transport (IEA) | [GO:0016021] CELLULAR_COMPONENT integral to membrane (IEA) | [GO:0009792] BIOLOGICAL_PROCESS embryonic development ending in birth or egg hatching (IMP) | [GO:0002119] BIOLOGICAL_PROCESS nematode larval development (IMP) | [GO:0040007] BIOL…	WBGene00015297	176580_at	0.22975	0.0091	3.4124	0.018066	0.653	0.259217	0.96419	2.20805	10.8394	lgc-12	R13A5.4	[GO:0005230] MOLECULAR_FUNCTION extracellular ligand-gated ion channel activity (IEA) | [GO:0006811] BIOLOGICAL_PROCESS ion transport (IEA) | [GO:0016021] CELLULAR_COMPONENT integral to membrane (IEA) | [GO:0045211] CELLULAR_COMPONENT postsynaptic membrane (IEA) | [GO:0006810] BIOLOGICAL_PROCESS transport (IEA) | [GO:0016020] CELLULAR_COMPONENT membrane (IEA)	WBGene00020048
182304_s_at	0.63989	0.0003	12.0797	0.00024166	7.958	0.733431	0.849405	2.60513	588.587	F28H1.4	F28H1.4	[GO:0016020] CELLULAR_COMPONENT membrane (IEA) | [GO:0016021] CELLULAR_COMPONENT integral to membrane (IEA)	WBGene00017909	176600_s_at	0.33544	0.0016	3.8291	0.010828	11.017	0.190748	0.812841	4.26287	579.486	mai-1	K10B3.9	[GO:0004857] MOLECULAR_FUNCTION enzyme inhibitor activity (IEA) | [GO:0005739] CELLULAR_COMPONENT mitochondrion (IEA) | [GO:0045980] BIOLOGICAL_PROCESS negative regulation of nucleotide metabolic process (IEA)	WBGene00003124
182312_at	0.39004	0.0111	3.9693	0.023421	20.639	0.38811	0.530199	2.72153	27195.8	gak-1	C05D2.5	[GO:0000003] BIOLOGICAL_PROCESS reproduction (IMP)	WBGene00001514	176615_at	0.32789	0.0036	3.8261	0.010867	13.596	0.444423	0.790811	2.09862	167.062	ceh-13	R13A5.5	[GO:0009790] BIOLOGICAL_PROCESS embryonic development (IMP) via [WBPaper00003508] Brunschwig K et al. (1999) | [GO:0016337] BIOLOGICAL_PROCESS cell-cell adhesion (IMP) via [WBPaper00003508] Brunschwig K et al. (1999) | [GO:0045449] BIOLOGICAL_PROCESS regulation of transcription (IC) via [WBPaper00003508] Brunschwig K et al. (1999) | [GO:0045449] BIOLOGICAL_PROCESS regulation of transcription (IEA…	WBGene00000437
182318_s_at	0.4578	0.0139	6.2483	0.0044595	19.541	0.589481	0.758271	3.40045	7017.61	C36C9.1	C36C9.1		WBGene00016485	176621_s_at	0.24145	0.0176	3.9418	0.0094546	3.19	0.173665	0.556616	2.49069	46.2487	unc-36	C50C3.9	[GO:0040015] BIOLOGICAL_PROCESS negative regulation of multicellular organism growth (IMP) | [GO:0040011] BIOLOGICAL_PROCESS locomotion (IMP) | [GO:0040017] BIOLOGICAL_PROCESS positive regulation of locomotion (IMP)	WBGene00006772
182323_at	0.50324	0.0054	5.1858	0.0091595	8.045	0.547192	0.627736	9.28035	2245.29	fbxa-105	C02H6.2		WBGene00015362	176625_at	0.33779	0.0017	2.9115	0.034173	14.795	0.146641	0.560433	1.85782	2355.66	nhr-13	Y5H2B.2	[GO:0003700] MOLECULAR_FUNCTION transcription factor activity (IEA) | [GO:0003707] MOLECULAR_FUNCTION steroid hormone receptor activity (IEA) | [GO:0005634] CELLULAR_COMPONENT nucleus (IEA) | [GO:0006355] BIOLOGICAL_PROCESS regulation of transcription, DNA-dependent (IEA) | [GO:0008270] MOLECULAR_FUNCTION zinc ion binding (IEA) | [GO:0043565] MOLECULAR_FUNCTION sequence-specific DNA binding (IEA)	WBGene00003612
182403_at	0.53608	0.0016	8.2402	0.0013997	7.699	0.655252	0.831035	3.3007	8704.65	ZK418.7	ZK418.7	[GO:0016021] CELLULAR_COMPONENT integral to membrane (IEA) | [GO:0040010] BIOLOGICAL_PROCESS positive regulation of growth rate (IMP)	WBGene00022736	176637_s_at	0.63739	0	9.7154	3.59e-05	22.274	0.681317	0.943792	16.7219	3233.93	C06H5.6	C06H5.6	[GO:0005215] MOLECULAR_FUNCTION transporter activity (IEA) | [GO:0006810] BIOLOGICAL_PROCESS transport (IEA) | [GO:0016021] CELLULAR_COMPONENT integral to membrane (IEA)	WBGene00007394
182439_at	0.33175	0.0097	3.5554	0.033335	7.341	0.35396	0.609522	3.89953	18833	Y17D7B.4	Y17D7B.4		WBGene00012452	176652_s_at	0.30185	0.0069	3.1284	0.025856	4.644	0.156796	0.916435	3.72741	150.355	Y19D10A.16	Y19D10A.16	[GO:0005975] BIOLOGICAL_PROCESS carbohydrate metabolic process (IEA) | [GO:0016853] MOLECULAR_FUNCTION isomerase activity (IEA) | [GO:0003824] MOLECULAR_FUNCTION catalytic activity (IEA) | [GO:0030246] MOLECULAR_FUNCTION carbohydrate binding (IEA) | [GO:0002119] BIOLOGICAL_PROCESS nematode larval development (IMP) | [GO:0040007] BIOLOGICAL_PROCESS growth (IMP) | [GO:0010171] BIOLOGICAL_PROCESS bo…	WBGene00044734
182471_at	0.60035	0.0017	7.4378	0.0021753	7.156	0.595247	0.736486	1.88684	7195.13	tag-299	F20D1.10	[GO:0016021] CELLULAR_COMPONENT integral to membrane (IEA)	WBGene00008980	176694_at	0.25068	0.0119	3.3791	0.018834	15.405	0.0989855	0.687613	7.72929	22.6961	fbxb-97	C52E2.6		WBGene00016885
182479_at	0.34261	0.0027	3.8076	0.026824	8.796	0.382909	0.444964	1.96692	6302.81	B0454.5	B0454.5	[GO:0016021] CELLULAR_COMPONENT integral to membrane (IEA)	WBGene00015196	176702_at	0.37992	0.0003	5.3385	0.0019454	21.702	0.466671	0.695815	4.81468	36568.8	dpyd-1	C25F6.3	[GO:0016491] MOLECULAR_FUNCTION oxidoreductase activity (IEA) | [GO:0009055] MOLECULAR_FUNCTION electron carrier activity (IEA) | [GO:0004158] MOLECULAR_FUNCTION dihydroorotate oxidase activity (IEA) | [GO:0005737] CELLULAR_COMPONENT cytoplasm (IEA) | [GO:0006207] BIOLOGICAL_PROCESS 'de novo' pyrimidine base biosynthetic process (IEA) | [GO:0051536] MOLECULAR_FUNCTION iron-sulfur cluster binding …	WBGene00016103
182483_s_at	0.37857	0.0032	4.3407	0.017326	19.177	0.496888	0.702312	2.61297	1207.71	T20F7.1	T20F7.1	[GO:0005622] CELLULAR_COMPONENT intracellular (IEA) | [GO:0008270] MOLECULAR_FUNCTION zinc ion binding (IEA)	WBGene00020630	176704_at	0.26803	0.0113	2.7198	0.043882	13.887	0.220893	0.582491	6.09724	293.487	Y66A7A.5	Y66A7A.5	[GO:0003700] MOLECULAR_FUNCTION transcription factor activity (IEA) | [GO:0005634] CELLULAR_COMPONENT nucleus (IEA) | [GO:0006355] BIOLOGICAL_PROCESS regulation of transcription, DNA-dependent (IEA) | [GO:0043565] MOLECULAR_FUNCTION sequence-specific DNA binding (IEA) | [GO:0003677] MOLECULAR_FUNCTION DNA binding (IEA) | [GO:0045449] BIOLOGICAL_PROCESS regulation of transcription (IEA) | [GO:0000…	WBGene00013425
182529_at	0.32057	0.0057	3.2439	0.044036	18.148	0.370909	0.57626	2.70489	1472.19	C31E10.5	C31E10.5		WBGene00007846	176747_s_at	0.25521	0.0057	3.3578	0.019343	19.76	0.206693	0.646832	6.29423	9457.08	gsp-2	F56C9.1	[GO:0031965] CELLULAR_COMPONENT nuclear membrane (IDA) via [WBPaper00005980] Sassa T et al. (2003) | [GO:0005634] CELLULAR_COMPONENT nucleus (IDA) via [WBPaper00005980] Sassa T et al. (2003) | [GO:0005737] CELLULAR_COMPONENT cytoplasm (IDA) via [WBPaper00005980] Sassa T et al. (2003) | [GO:0005694] CELLULAR_COMPONENT chromosome (IDA) via [WBPaper00005980] Sassa T et al. (2003) | [GO:0016787] MOLE…	WBGene00001748
182606_at	0.46853	0.0005	3.8598	0.025666	7.072	0.367004	0.52849	2.93096	56.9769	W05B10.3	W05B10.3		WBGene00012278	176761_at	0.18665	0.0154	3.4823	0.01656	3.066	0.214635	0.52533	6.82864	85.2771	C52A10.3	C52A10.3		WBGene00016864
182770_at	0.39385	0.0072	3.8871	0.025085	9.38	0.439425	0.599704	2.81411	503.854	D2096.5	D2096.5	[GO:0016021] CELLULAR_COMPONENT integral to membrane (IEA)	WBGene00017072	176769_s_at	0.54248	0	9.6507	3.78e-05	20.812	0.661344	0.90713	5.68222	139758	ads-1	Y50D7A.7	[GO:0003824] MOLECULAR_FUNCTION catalytic activity (IEA) | [GO:0050660] MOLECULAR_FUNCTION FAD binding (IEA) | [GO:0002119] BIOLOGICAL_PROCESS nematode larval development (IMP) | [GO:0040007] BIOLOGICAL_PROCESS growth (IMP) | [GO:0009792] BIOLOGICAL_PROCESS embryonic development ending in birth or egg hatching (IMP)	WBGene00000081
182778_at	0.50679	0.0038	6.179	0.0046623	20.838	0.658301	0.926803	1.85544	16467.2	Y59A8A.3	Y59A8A.3	[GO:0016021] CELLULAR_COMPONENT integral to membrane (IEA)	WBGene00013340	176770_at	0.28335	0.0058	2.7384	0.042822	22.303	0.156	0.646	2.43176	72.8698	F14H12.7	F14H12.7	[GO:0016021] CELLULAR_COMPONENT integral to membrane (IEA)	WBGene00017474
182797_at	0.57149	0.0024	3.6465	0.030793	15.94	0.384293	0.562221	2.77313	39010.6	Y11D7A.7	Y11D7A.7		WBGene00012431	176781_at	0.37721	0.0004	4.591	0.0044339	7.083	0.175037	0.550882	3.1098	1493.7	C46C11.2	C46C11.2	[GO:0016021] CELLULAR_COMPONENT integral to membrane (IEA)	WBGene00016705
182798_at	0.50308	0.0002	7.7425	0.001833	7.502	0.65657	0.736043	4.34515	22626.6	T04A6.1	T04A6.1	[GO:0016021] CELLULAR_COMPONENT integral to membrane (IEA)	WBGene00020200	176782_s_at	0.40677	0.0011	4.9652	0.0029174	6.576	0.321968	0.561528	3.93328	2271.34	C46C11.2	C46C11.2	[GO:0016021] CELLULAR_COMPONENT integral to membrane (IEA)	WBGene00016705
182815_at	0.52702	0.0046	8.3813	0.0012994	9.208	0.664622	0.815804	7.02086	59808	T24C4.4	T24C4.4	[GO:0016021] CELLULAR_COMPONENT integral to membrane (IEA)	WBGene00020760	176797_at	0.33325	0.0046	4.5331	0.004736	8.247	0.390242	0.733953	4.3472	52.5821	C03B1.13	C03B1.13	[GO:0005215] MOLECULAR_FUNCTION transporter activity (IEA) | [GO:0006810] BIOLOGICAL_PROCESS transport (IEA) | [GO:0016020] CELLULAR_COMPONENT membrane (IEA) | [GO:0016021] CELLULAR_COMPONENT integral to membrane (IEA)	WBGene00015381
182824_at	0.42065	0.0184	3.9532	0.023736	16.609	0.425187	0.716154	2.66452	131821	C32E8.5	C32E8.5	[GO:0040010] BIOLOGICAL_PROCESS positive regulation of growth rate (IMP) | [GO:0009792] BIOLOGICAL_PROCESS embryonic development ending in birth or egg hatching (IMP) | [GO:0000003] BIOLOGICAL_PROCESS reproduction (IMP) | [GO:0002119] BIOLOGICAL_PROCESS nematode larval development (IMP) | [GO:0040007] BIOLOGICAL_PROCESS growth (IMP) | [GO:0010171] BIOLOGICAL_PROCESS body morphogenesis (IMP) | [GO…	WBGene00016323	176798_s_at	0.32938	0.0027	3.0163	0.029849	7.454	0.320296	0.613832	7.23257	423.948	C03B1.13	C03B1.13	[GO:0005215] MOLECULAR_FUNCTION transporter activity (IEA) | [GO:0006810] BIOLOGICAL_PROCESS transport (IEA) | [GO:0016020] CELLULAR_COMPONENT membrane (IEA) | [GO:0016021] CELLULAR_COMPONENT integral to membrane (IEA)	WBGene00015381
182836_at	0.47574	0.0027	5.4417	0.0076429	7.878	0.474858	0.616391	2.24479	20785	C29G2.6	C29G2.6		WBGene00016234	176804_at	0.45048	0.0001	5.4629	0.0017043	7.767	0.250861	0.428589	9.82467	177.632	F45E4.11	F45E4.11	[GO:0005215] MOLECULAR_FUNCTION transporter activity (IEA) | [GO:0006810] BIOLOGICAL_PROCESS transport (IEA) | [GO:0016021] CELLULAR_COMPONENT integral to membrane (IEA)	WBGene00018473
182907_s_at	0.49271	0.0025	4.0811	0.021357	17.313	0.376606	0.683762	5.82755	22716	ZK328.4	ZK328.4		WBGene00022694	176843_s_at	0.26873	0.0106	2.901	0.03464	12.474	0.0498207	0.24353	5.55686	2872.76	F41H10.6	F41H10.6	[GO:0008270] MOLECULAR_FUNCTION zinc ion binding (IEA)	WBGene00018319
182940_s_at	0.42696	0.0042	4.2058	0.0193	19.371	0.476229	0.79243	1.89203	14199.6	K01D12.6	K01D12.6	[GO:0016021] CELLULAR_COMPONENT integral to membrane (IEA)	WBGene00010465	176845_s_at	0.53022	0	11.7027	8.32e-06	4.862	0.60882	0.956411	10.3182	43.4605	Y19D10A.7	Y19D10A.7	[GO:0016020] CELLULAR_COMPONENT membrane (IEA)	WBGene00021222
182942_at	0.52553	0.0013	5.4572	0.0075608	6.658	0.568992	0.784614	3.63841	25458.8	ZK1058.9	ZK1058.9	[GO:0040010] BIOLOGICAL_PROCESS positive regulation of growth rate (IMP)	WBGene00014207	176869_s_at	0.29844	0.0053	3.7949	0.011284	18.236	0.27799	0.448279	4.56991	348.247	ncl-1	ZK112.2	[GO:0005737] CELLULAR_COMPONENT cytoplasm (IDA) via [WBPaper00003044] Frank DJ et al. (1998) | [GO:0005622] CELLULAR_COMPONENT intracellular (IEA) | [GO:0008270] MOLECULAR_FUNCTION zinc ion binding (IEA)	WBGene00003559
182967_at	0.40027	0.001	7.0553	0.0027157	8.45	0.680326	0.937973	3.99289	2479.18	nlp-7	F18E9.2	[GO:0016021] CELLULAR_COMPONENT integral to membrane (IEA)	WBGene00003745	176897_at	0.51249	0	10.8388	1.54e-05	22.165	0.619959	0.846821	4.24529	204.427	Y73E7A.3	Y73E7A.3	[GO:0016021] CELLULAR_COMPONENT integral to membrane (IEA)	WBGene00022270
182980_at	0.44073	0.0121	5.4808	0.0074377	6.91	0.552319	0.727434	2.1892	1493.45	T08B1.4	T08B1.4		WBGene00020341	176901_at	0.32008	0.0046	4.7586	0.0036702	14.728	0.43607	0.877918	2.74126	1824.09	bre-4	Y73E7A.7	[GO:0009636] BIOLOGICAL_PROCESS response to toxin (IMP) via [WBPaper00004264] Marroquin LD et al. (2000) Genetics "Bacillus thuringiensis (Bt) | [GO:0045747] BIOLOGICAL_PROCESS positive regulation of Notch signaling pathway (IGI) via [WBPaper00026799] Katic I et al. (2005) | [GO:0005975] BIOLOGICAL_PROCESS carbohydrate metabolic process (IEA) | [GO:0009045] MOLECULAR_FUNCTION xylose isomerase act…	WBGene00000269
183064_at	0.35631	0.0135	3.8178	0.026593	7.821	0.503888	0.7668	3.62515	31950	F17H10.2	F17H10.2	[GO:0016021] CELLULAR_COMPONENT integral to membrane (IEA)	WBGene00008926	176909_s_at	0.38106	0.0004	4.5121	0.0048513	22.678	0.30903	0.686932	2.81072	525.954	lfe-2	C46H11.4	[GO:0008440] MOLECULAR_FUNCTION inositol trisphosphate 3-kinase activity (IEA)	WBGene00002979
183088_at	0.39838	0.0034	4.0426	0.022044	18.574	0.431158	0.491828	1.61412	17541.3	Y39B6A.36	Y39B6A.36	[GO:0003702] MOLECULAR_FUNCTION RNA polymerase II transcription factor activity (IEA) | [GO:0005524] MOLECULAR_FUNCTION ATP binding (IEA) | [GO:0005674] CELLULAR_COMPONENT transcription factor TFIIF complex (IEA) | [GO:0006367] BIOLOGICAL_PROCESS transcription initiation from RNA polymerase II promoter (IEA) | [GO:0040010] BIOLOGICAL_PROCESS positive regulation of growth rate (IMP) | [GO:0000003]…	WBGene00012694	176911_at	0.4439	0.0003	5.0923	0.0025379	11.338	0.411401	0.821304	1.78617	506.289	Y47D3A.20	Y47D3A.20	[GO:0009792] BIOLOGICAL_PROCESS embryonic development ending in birth or egg hatching (IMP)	WBGene00012931
183089_at	0.46357	0.0091	4.148	0.020224	6.632	0.437374	0.484897	2.63125	20815.9	C15C7.5	C15C7.5	[GO:0040010] BIOLOGICAL_PROCESS positive regulation of growth rate (IMP) | [GO:0040011] BIOLOGICAL_PROCESS locomotion (IMP)	WBGene00015791	176916_at	0.24848	0.002	3.8241	0.010893	8.855	0.362334	0.754127	4.18088	283.956	Y67H2A.9	Y67H2A.9
183110_at	0.31305	0.0091	4.5504	0.014703	7.85	0.443694	0.666183	2.28549	6499.52	F25B4.8	F25B4.8	[GO:0008152] BIOLOGICAL_PROCESS metabolic process (IEA) | [GO:0016846] MOLECULAR_FUNCTION carbon-sulfur lyase activity (IEA)	WBGene00017771	176936_at	0.50931	0	5.8875	0.0010954	18.658	0.436483	0.608287	2.91923	1497.24	Y48G9A.9	Y48G9A.9	[GO:0004725] MOLECULAR_FUNCTION protein tyrosine phosphatase activity (IEA) | [GO:0006470] BIOLOGICAL_PROCESS protein amino acid dephosphorylation (IEA) | [GO:0016311] BIOLOGICAL_PROCESS dephosphorylation (IEA) | [GO:0016791] MOLECULAR_FUNCTION phosphatase activity (IEA)	WBGene00021702
183115_at	0.47173	0.0081	3.4043	0.038101	7.112	0.297573	0.745315	5.31068	35570.8	C34H4.2	C34H4.2		WBGene00016425	176942_at	0.24906	0.0032	4.7715	0.0036174	18.439	0.37201	0.556472	2.06213	244682	Y24D9A.8	Y24D9A.8	[GO:0005975] BIOLOGICAL_PROCESS carbohydrate metabolic process (IEA) | [GO:0004801] MOLECULAR_FUNCTION transaldolase activity (IEA) | [GO:0005737] CELLULAR_COMPONENT cytoplasm (IEA) | [GO:0006098] BIOLOGICAL_PROCESS pentose-phosphate shunt (IEA) | [GO:0003824] MOLECULAR_FUNCTION catalytic activity (IEA) | [GO:0008152] BIOLOGICAL_PROCESS metabolic process (IEA)	WBGene00021286
183193_at	0.48272	0.0005	10.6272	0.00044315	7.254	0.721468	0.806916	2.9497	103956	C46G7.2	C46G7.2		WBGene00016722	176955_at	0.65691	0	10.4597	2.04e-05	19.756	0.631038	0.876816	11.4079	237378	ech-7	Y105E8A.4	[GO:0003824] MOLECULAR_FUNCTION catalytic activity (IEA) | [GO:0008152] BIOLOGICAL_PROCESS metabolic process (IEA)	WBGene00001156
183201_at	0.41701	0.0015	5.5762	0.006963	7.352	0.529504	0.60257	2.90923	42348.8	M02D8.1	M02D8.1		WBGene00019727	176965_at	0.3594	0.0005	5.6385	0.001417	18.772	0.309382	0.760055	6.47211	86.1508	cpt-3	Y48G9A.10	[GO:0004197] MOLECULAR_FUNCTION cysteine-type endopeptidase activity (IEA) | [GO:0006508] BIOLOGICAL_PROCESS proteolysis (IEA) | [GO:0008415] MOLECULAR_FUNCTION acyltransferase activity (IEA) | [GO:0016021] CELLULAR_COMPONENT integral to membrane (IEA)	WBGene00021703
183214_at	0.41006	0.0052	4.6939	0.013171	8.551	0.485867	0.675063	1.95744	34319	hint-3	C26F1.7	[GO:0003824] MOLECULAR_FUNCTION catalytic activity (IEA)	WBGene00016150	176998_at	0.47485	0.0002	5.841	0.0011489	19.94	0.327857	0.786561	2.95239	972.341	Y54G2A.19	Y54G2A.19		WBGene00021884
183227_at	0.49708	0.0047	3.3363	0.040498	16.698	0.317156	0.760765	2.78621	14594.4	eri-1	T07A9.5	[GO:0016246] BIOLOGICAL_PROCESS RNA interference (IMP) via [WBPaper00006382] Kennedy S et al. (2004) | [GO:0045132] BIOLOGICAL_PROCESS meiotic chromosome segregation (IMP) via [WBPaper00006382] Kennedy S et al. (2004) | [GO:0048609] BIOLOGICAL_PROCESS reproductive process in a multicellular organism (IMP) via [WBPaper00006382] Kennedy S et al. (2004) | [GO:0006401] BIOLOGICAL_PROCESS RNA cataboli…	WBGene00001332	177038_at	0.34742	0.0003	4.7555	0.0036829	6.336	0.307751	0.529039	4.02694	277896	Y94H6A.10	Y94H6A.10		WBGene00022382
183245_at	0.50067	0.0006	3.7493	0.02819	15.984	0.373955	0.467202	2.75262	35142.1	T07A9.8	T07A9.8	[GO:0040010] BIOLOGICAL_PROCESS positive regulation of growth rate (IMP)	WBGene00020296	177062_at	0.29637	0.0007	3.3594	0.019305	17.288	0.146623	0.637566	2.12946	133.029	vps-41	F32A6.3	[GO:0040007] BIOLOGICAL_PROCESS growth (IMP) | [GO:0002119] BIOLOGICAL_PROCESS nematode larval development (IMP) | [GO:0005515] MOLECULAR_FUNCTION protein binding (IEA) | [GO:0006886] BIOLOGICAL_PROCESS intracellular protein transport (IEA) | [GO:0016192] BIOLOGICAL_PROCESS vesicle-mediated transport (IEA) | [GO:0008270] MOLECULAR_FUNCTION zinc ion binding (IEA) | [GO:0009792] BIOLOGICAL_PROCESS …	WBGene00017974
183263_s_at	0.36192	0.0091	3.3812	0.038895	7.892	0.315128	0.528326	2.92916	13640.7	F59B1.8	F59B1.8	[GO:0040010] BIOLOGICAL_PROCESS positive regulation of growth rate (IMP)	WBGene00019100	177069_s_at	0.20492	0.0044	2.7975	0.039639	10.78	0.258054	0.652305	1.52093	211363	Y94H6A.8	Y94H6A.8	[GO:0008137] MOLECULAR_FUNCTION NADH dehydrogenase (ubiquinone) activity (IEA) | [GO:0009055] MOLECULAR_FUNCTION electron carrier activity (IEA) | [GO:0016020] CELLULAR_COMPONENT membrane (IEA)	WBGene00022380
183294_at	0.39928	0.0164	3.1398	0.048452	8.974	0.362437	0.407358	5.11087	1998.29	F58F9.3	F58F9.3		WBGene00019057	177070_s_at	0.43876	0.0003	6.593	0.00054234	23.874	0.442471	0.625922	5.73609	117287	vha-16	C30F8.2	[GO:0016469] CELLULAR_COMPONENT proton-transporting two-sector ATPase complex (IEA) | [GO:0046961] MOLECULAR_FUNCTION hydrogen ion transporting ATPase activity, rotational mechanism (IEA) | [GO:0002119] BIOLOGICAL_PROCESS nematode larval development (IMP) | [GO:0040007] BIOLOGICAL_PROCESS growth (IMP) | [GO:0000003] BIOLOGICAL_PROCESS reproduction (IMP)	WBGene00016258
183314_at	0.49096	0.0005	6.3907	0.0040738	7.141	0.591736	0.710395	3.6118	14777.1	C29F5.1	C29F5.1		WBGene00016210	177085_at	0.44908	0.0002	6.5444	0.0005686	19.52	0.405073	0.87031	3.49407	220.253	Y55F3BR.2	Y55F3BR.2	[GO:0004867] MOLECULAR_FUNCTION serine-type endopeptidase inhibitor activity (IEA) | [GO:0009792] BIOLOGICAL_PROCESS embryonic development ending in birth or egg hatching (IMP)	WBGene00021939
183337_at	0.44969	0.0119	4.7815	0.012328	16.406	0.43726	0.976817	1.7166	806.249	C49H3.4	C49H3.4		WBGene00016791	177096_at	0.25135	0.0195	2.6785	0.046329	18.244	0.116835	0.409254	2.0805	3034.53	cogc-3	Y71F9AM.4	[GO:0030334] BIOLOGICAL_PROCESS regulation of cell migration (IMP) via [WBPaper00026979] Kubota Y et al. (2005) | [GO:0035262] BIOLOGICAL_PROCESS gonad morphogenesis (IMP) via [WBPaper00026979] Kubota Y et al. (2005) | [GO:0005794] CELLULAR_COMPONENT Golgi apparatus (IDA) via [WBPaper00026979] Kubota Y et al. (2005) | [GO:0005783] CELLULAR_COMPONENT endoplasmic reticulum (IDA) via [WBPaper0002697…	WBGene00022121
183357_at	0.36095	0.0023	3.3941	0.038449	7.539	0.309192	0.630097	5.87573	319.54	Y50E8A.1	Y50E8A.1		WBGene00013046	177116_at	0.33347	0.0027	4.5524	0.0046328	1.223	0.229277	0.467827	6.97551	339.366	M7.12	M7.12		WBGene00010887
183370_at	0.35142	0.0176	3.1152	0.049569	9.148	0.193008	0.813114	2.1394	40.873	C06E4.2	C06E4.2		WBGene00015531	177131_s_at	0.43503	0.0002	3.9149	0.0097647	7.44	0.453235	0.730411	2.68103	634642	Y19D10B.7	Y19D10B.7		WBGene00021236
183378_at	0.44417	0.0004	4.3552	0.017129	8.711	0.413759	0.580828	2.39695	48170.3	F55G11.8	F55G11.8		WBGene00010128	177152_at	0.31144	0.0046	3.2223	0.022946	15.159	0.222096	0.650906	4.82035	836.742	Y45G5AM.3	Y45G5AM.3		WBGene00021556
183449_s_at	0.40536	0.0061	3.1919	0.046183	7.427	0.271766	0.573932	4.64968	34381.4	drr-1	F45H10.4	[GO:0016020] CELLULAR_COMPONENT membrane (IEA) | [GO:0016021] CELLULAR_COMPONENT integral to membrane (IEA)	WBGene00009741	177155_at	0.3102	0.0028	3.4602	0.017021	6.642	0.214429	0.654106	2.79804	68.3292	Y38C1AA.6	Y38C1AA.6	[GO:0005515] MOLECULAR_FUNCTION protein binding (IEA) | [GO:0008270] MOLECULAR_FUNCTION zinc ion binding (IEA)	WBGene00021397
183450_at	0.28423	0.0147	3.5267	0.034183	7.311	0.363633	0.62547	1.75586	520168	clec-1	F25B4.9	[GO:0005488] MOLECULAR_FUNCTION binding (IEA) | [GO:0010171] BIOLOGICAL_PROCESS body morphogenesis (IMP) | [GO:0040011] BIOLOGICAL_PROCESS locomotion (IMP) | [GO:0040018] BIOLOGICAL_PROCESS positive regulation of multicellular organism growth (IMP) | [GO:0002009] BIOLOGICAL_PROCESS morphogenesis of an epithelium (IMP) | [GO:0002119] BIOLOGICAL_PROCESS nematode larval development (IMP) | [GO:00400…	WBGene00017772	177172_at	0.48185	0	4.8518	0.0033076	16.205	0.183812	0.583464	2.81988	642.132	Y61A9LA.8	Y61A9LA.8	[GO:0003676] MOLECULAR_FUNCTION nucleic acid binding (IEA) | [GO:0008270] MOLECULAR_FUNCTION zinc ion binding (IEA)	WBGene00022019
183457_s_at	0.39871	0.0065	4.9195	0.011122	19.055	0.505456	0.913298	3.29444	11081.4	Y39B6A.10	Y39B6A.10	[GO:0016021] CELLULAR_COMPONENT integral to membrane (IEA)	WBGene00012672	177182_at	0.36818	0.0036	8.1207	0.00013355	18.322	0.48639	0.722363	4.18183	2915.85	cogc-3	Y71F9AM.4	[GO:0030334] BIOLOGICAL_PROCESS regulation of cell migration (IMP) via [WBPaper00026979] Kubota Y et al. (2005) | [GO:0035262] BIOLOGICAL_PROCESS gonad morphogenesis (IMP) via [WBPaper00026979] Kubota Y et al. (2005) | [GO:0005794] CELLULAR_COMPONENT Golgi apparatus (IDA) via [WBPaper00026979] Kubota Y et al. (2005) | [GO:0005783] CELLULAR_COMPONENT endoplasmic reticulum (IDA) via [WBPaper0002697…	WBGene00022121
183467_at	0.49605	0.0041	3.1539	0.047828	16.042	0.316321	0.610485	4.78954	1169.41	C50F4.12	C50F4.12		WBGene00008236	177189_at	0.37978	0.0002	4.7665	0.0036376	10.742	0.322197	0.603718	2.83838	1903.31	3R5.1	3R5.1		WBGene00007065
183499_at	0.33375	0.0179	3.1185	0.049419	6.714	0.358388	0.577752	3.40998	370.796	C10A4.4	C10A4.4	[GO:0016021] CELLULAR_COMPONENT integral to membrane (IEA)	WBGene00015665	177190_at	0.64666	0	9.4577	4.4e-05	21.454	0.628488	0.745348	3.88759	30146.1	Y71H2AL.1	Y71H2AL.1	[GO:0005509] MOLECULAR_FUNCTION calcium ion binding (IEA) | [GO:0040010] BIOLOGICAL_PROCESS positive regulation of growth rate (IMP) | [GO:0002119] BIOLOGICAL_PROCESS nematode larval development (IMP) | [GO:0040007] BIOLOGICAL_PROCESS growth (IMP)	WBGene00022164
183624_at	0.41706	0.0182	6.0104	0.0052025	8.041	0.554364	0.699478	6.73094	1630.74	dod-22	F55G11.5	[GO:0008340] BIOLOGICAL_PROCESS determination of adult life span (IMP)	WBGene00010125	177196_s_at	0.42296	0.0001	6.4479	0.00062481	9.886	0.543994	0.90983	4.49882	16480	M88.2	M88.2	[GO:0009792] BIOLOGICAL_PROCESS embryonic development ending in birth or egg hatching (IMP) | [GO:0002119] BIOLOGICAL_PROCESS nematode larval development (IMP) | [GO:0040007] BIOLOGICAL_PROCESS growth (IMP) | [GO:0040010] BIOLOGICAL_PROCESS positive regulation of growth rate (IMP)	WBGene00010905
183635_s_at	0.5796	0.0014	5.8971	0.0056064	16.553	0.554376	0.694602	3.05007	5071.76	C01G5.8	C01G5.8		WBGene00015310	177211_at	0.2994	0.005	2.6509	0.048044	20.123	0.166002	0.522663	3.70734	3954.66	Y45G12B.2	Y45G12B.2	[GO:0005515] MOLECULAR_FUNCTION protein binding (IEA) | [GO:0008270] MOLECULAR_FUNCTION zinc ion binding (IEA) | [GO:0016021] CELLULAR_COMPONENT integral to membrane (IEA)	WBGene00021563
183649_at	0.52106	0.0036	4.412	0.016378	4.896	0.442559	0.550264	2.17391	278.873	wrk-1	F41D9.3		WBGene00006942	177219_at	0.26494	0.015	4.4296	0.0053326	9.712	0.182218	0.523073	6.45319	1767.77	M28.8	M28.8	[GO:0016021] CELLULAR_COMPONENT integral to membrane (IEA)	WBGene00010899
183676_s_at	0.5659	0.0012	6.8897	0.002997	7.91	0.606461	0.7547	6.43338	25760.8	numr-1	F08F8.5		WBGene00017270	177222_at	0.35416	0.0026	3.2271	0.022807	21.06	0.252854	0.68969	2.08333	147.578	Y53G8AM.8	Y53G8AM.8	[GO:0003677] MOLECULAR_FUNCTION DNA binding (IEA) | [GO:0045449] BIOLOGICAL_PROCESS regulation of transcription (IEA) | [GO:0009792] BIOLOGICAL_PROCESS embryonic development ending in birth or egg hatching (IMP)	WBGene00021808
183685_at	0.59177	0.0013	4.4467	0.015938	7.456	0.417918	0.559371	3.83259	71.5548	col-116	F17E9.1	[GO:0016021] CELLULAR_COMPONENT integral to membrane (IEA)	WBGene00000690	177223_s_at	0.35157	0.0015	7.5278	0.0002259	22.256	0.513138	0.861452	1.94793	391.138	Y53G8AM.8	Y53G8AM.8	[GO:0003677] MOLECULAR_FUNCTION DNA binding (IEA) | [GO:0045449] BIOLOGICAL_PROCESS regulation of transcription (IEA) | [GO:0009792] BIOLOGICAL_PROCESS embryonic development ending in birth or egg hatching (IMP)	WBGene00021808
183704_at	0.59113	0	14.5229	9.8238e-05	19.958	0.781204	0.914409	2.21566	5748.27	T20F5.7	T20F5.7	[GO:0005515] MOLECULAR_FUNCTION protein binding (IEA) | [GO:0008270] MOLECULAR_FUNCTION zinc ion binding (IEA)	WBGene00020629	177224_at	0.35863	0.0009	5.3735	0.001874	18.28	0.478281	0.678293	5.31315	932.629	mfb-1	DY3.6	[GO:0004190] MOLECULAR_FUNCTION aspartic-type endopeptidase activity (IEA) | [GO:0006508] BIOLOGICAL_PROCESS proteolysis (IEA) | [GO:0043053] BIOLOGICAL_PROCESS dauer entry (IMP)	WBGene00008439
183710_at	0.37018	0.0039	3.4908	0.035284	6.977	0.409905	0.505854	4.29485	77430.7	ger-1	R01H2.5	[GO:0042350] BIOLOGICAL_PROCESS GDP-L-fucose biosynthetic process (IDA) via [WBPaper00027362] Rhomberg S et al. (2006) | [GO:0050577] MOLECULAR_FUNCTION GDP-L-fucose synthase activity (IDA) via [WBPaper00027362] Rhomberg S et al. (2006) | [GO:0003824] MOLECULAR_FUNCTION catalytic activity (IEA) | [GO:0044237] BIOLOGICAL_PROCESS cellular metabolic process (IEA) | [GO:0050662] MOLECULAR_FUNCTION co…	WBGene00019813	177234_at	0.3364	0.0033	3.3936	0.018495	18.495	0.273545	0.463268	3.10715	13032.4	M57.2	M57.2	[GO:0008318] MOLECULAR_FUNCTION protein prenyltransferase activity (IEA) | [GO:0018346] BIOLOGICAL_PROCESS protein amino acid prenylation (IEA) | [GO:0005488] MOLECULAR_FUNCTION binding (IEA) | [GO:0009792] BIOLOGICAL_PROCESS embryonic development ending in birth or egg hatching (IMP) | [GO:0040010] BIOLOGICAL_PROCESS positive regulation of growth rate (IMP) | [GO:0002009] BIOLOGICAL_PROCESS morp…	WBGene00019778
183753_at	0.46995	0.0019	3.6017	0.032014	7.976	0.45386	0.87069	3.93019	19.2401	T26A8.2	T26A8.2	[GO:0016021] CELLULAR_COMPONENT integral to membrane (IEA)	WBGene00020825	177253_at	0.31803	0.0051	3.2487	0.022193	8.561	0.0663584	0.610281	2.15655	52.6753	R186.1	R186.1	[GO:0009792] BIOLOGICAL_PROCESS embryonic development ending in birth or egg hatching (IMP)	WBGene00011305
183771_at	0.45498	0.0003	3.6701	0.030172	6.309	0.395189	0.768634	2.2988	10706	nrf-5	F55B12.5	[GO:0008289] MOLECULAR_FUNCTION lipid binding (IEA) | [GO:0009792] BIOLOGICAL_PROCESS embryonic development ending in birth or egg hatching (IMP) | [GO:0002119] BIOLOGICAL_PROCESS nematode larval development (IMP) | [GO:0040007] BIOLOGICAL_PROCESS growth (IMP)	WBGene00003812	177279_at	0.37615	0.0017	5.2676	0.0020991	19.295	0.397385	0.684824	3.46806	209594	M60.4	M60.4	[GO:0016021] CELLULAR_COMPONENT integral to membrane (IEA)	WBGene00019780
183817_at	0.41552	0.0131	4.5336	0.014895	18.415	0.482548	0.630901	2.36336	36133.7	K04G7.1	K04G7.1	[GO:0040010] BIOLOGICAL_PROCESS positive regulation of growth rate (IMP) | [GO:0009792] BIOLOGICAL_PROCESS embryonic development ending in birth or egg hatching (IMP) | [GO:0000003] BIOLOGICAL_PROCESS reproduction (IMP)	WBGene00019400	177290_at	0.29191	0.0032	3.4994	0.016211	16.665	0.241408	0.846817	3.71905	41.0895	ZK20.1	ZK20.1		WBGene00013923
183828_at	0.49032	0.0074	3.3175	0.041191	6.467	0.275858	0.721045	5.3294	80.5663	C08F11.3	C08F11.3	[GO:0016021] CELLULAR_COMPONENT integral to membrane (IEA)	WBGene00007452	177312_at	0.5499	0	6.9035	0.00040273	4.526	0.472557	0.747887	10.0393	2571.18	Y59H11AR.4	Y59H11AR.4	[GO:0016021] CELLULAR_COMPONENT integral to membrane (IEA)	WBGene00022012
183876_at	0.50829	0.0024	3.1999	0.045843	9.811	0.352722	0.451408	3.47369	120.376	C07G3.2	C07G3.2		WBGene00015574	177337_at	0.52908	0	8.5106	9.56e-05	20.38	0.575766	0.729307	4.09381	2081.54	R52.2	R52.2		WBGene00020074
183889_s_at	0.50893	0.006	6.7254	0.0033103	19.061	0.586	0.810797	2.0659	9867.06	aka-1	D1022.7	[GO:0032266] MOLECULAR_FUNCTION phosphatidylinositol 3-phosphate binding (ISS) via [WBPaper00028279] Hayakawa A et al. (2006)	WBGene00000101	177339_at	0.26315	0.0064	2.6284	0.049491	17.637	0.0298248	0.933124	8.55	234.757	R102.6	R102.6	[GO:0016021] CELLULAR_COMPONENT integral to membrane (IEA)	WBGene00011293
183956_at	0.69165	0.0002	18.6248	2.7801e-05	8.283	0.83221	0.907331	2.97768	22538.5	C48E7.1	C48E7.1	[GO:0016021] CELLULAR_COMPONENT integral to membrane (IEA)	WBGene00016749	177350_at	0.54786	0	7.9827	0.00015064	8.455	0.553786	0.829038	3.81877	1105.98	M176.11	M176.11	[GO:0016021] CELLULAR_COMPONENT integral to membrane (IEA)	WBGene00010947
183982_s_at	0.3378	0.0175	3.6074	0.031856	16.805	0.42497	0.6034	1.99481	4427.99	R02D3.4	R02D3.4		WBGene00019822	177368_at	0.7595	0	16.3379	4.79e-07	20.984	0.720092	0.888492	9.55465	188030	M60.2	M60.2	[GO:0006952] BIOLOGICAL_PROCESS defense response (IMP)	WBGene00019779
183996_s_at	0.51088	0.0057	3.3481	0.040068	18.426	0.378284	0.49075	4.01275	1525.36	pup-3	F59A3.9		WBGene00019082	177375_at	0.69786	0	13.7989	2.11e-06	20.868	0.644448	0.749621	49.766	135764	M60.2	M60.2	[GO:0006952] BIOLOGICAL_PROCESS defense response (IMP)	WBGene00019779
184055_at	0.49089	0.0029	5.7228	0.006301	3.826	0.511485	0.774777	1.6111	13.6003	C12D5.5	C12D5.5		WBGene00015708	177378_at	0.42523	0.0008	3.7325	0.012173	9.425	0.176267	0.441087	6.9825	75.6128	math-36	R52.8		WBGene00020079
184061_at	0.41295	0.0071	5.4131	0.0077967	17.877	0.520493	0.68517	3.5019	6463.79	T26A5.5	T26A5.5	[GO:0040010] BIOLOGICAL_PROCESS positive regulation of growth rate (IMP)	WBGene00020821	177410_at	0.57755	0	8.3052	0.00011389	7.574	0.55873	0.744221	3.9356	1527.62	C01A2.2	C01A2.2	[GO:0016021] CELLULAR_COMPONENT integral to membrane (IEA)	WBGene00007214
184062_at	0.50391	0.0021	3.6403	0.030959	20.216	0.370465	0.813804	1.90234	26457.7	B0336.5	B0336.5		WBGene00015145	177428_at	0.48999	0	6.015	0.00096197	6.079	0.389351	0.81817	5.24049	45687	F58G6.3	F58G6.3	[GO:0005375] MOLECULAR_FUNCTION copper ion transmembrane transporter activity (IEA) | [GO:0006825] BIOLOGICAL_PROCESS copper ion transport (IEA) | [GO:0016021] CELLULAR_COMPONENT integral to membrane (IEA)	WBGene00010274
184075_s_at	0.42531	0.0045	5.8822	0.0056623	19.086	0.555356	0.700195	2.08994	202165	ify-1	C27A2.3	[GO:0009792] BIOLOGICAL_PROCESS embryonic development ending in birth or egg hatching (IMP) | [GO:0000003] BIOLOGICAL_PROCESS reproduction (IMP) | [GO:0040035] BIOLOGICAL_PROCESS hermaphrodite genitalia development (IMP)	WBGene00002068	177439_s_at	0.28922	0.0098	3.1351	0.025637	10.435	0.217884	0.632162	2.78726	82531.4	F58D5.2	F58D5.2
184085_at	0.34336	0.0135	4.2806	0.018176	17.626	0.450997	0.603047	2.65482	1230.36	F25B4.2	F25B4.2		WBGene00017766	177468_at	0.35677	0.0012	4.5648	0.0045681	0.56	0.410854	0.824959	14.4703	5511.74	ZK896.4	ZK896.4		WBGene00014135
184107_at	0.56565	0.0011	5.6265	0.0067274	7.384	0.520636	0.663127	7.09893	9681.91	K09D9.1	K09D9.1	[GO:0040010] BIOLOGICAL_PROCESS positive regulation of growth rate (IMP)	WBGene00019564	177499_at	0.29231	0.0076	4.8651	0.0032588	20.955	0.370269	0.786719	3.89326	113.778	C38H2.2	C38H2.2	[GO:0016021] CELLULAR_COMPONENT integral to membrane (IEA)	WBGene00008019
184164_at	0.39845	0.0078	3.8546	0.025779	7.351	0.421045	0.59377	1.59321	80863.8	mif-1	Y56A3A.3		WBGene00003234	177514_at	0.39572	0.0003	4.9779	0.0028768	18.284	0.239427	0.760642	2.78084	1456.48	K10C8.1	K10C8.1		WBGene00010734
184272_at	0.49761	0.0056	3.1206	0.04932	16.783	0.319764	0.669617	2.80186	10078.6	C13F10.5	C13F10.5	[GO:0016021] CELLULAR_COMPONENT integral to membrane (IEA)	WBGene00015744	177544_at	0.62737	0	11.75	8.05e-06	20.511	0.589763	0.899549	55.5302	3009.17	F58E6.7	F58E6.7	[GO:0016021] CELLULAR_COMPONENT integral to membrane (IEA)	WBGene00010256
184352_at	0.43638	0.0138	3.3505	0.039982	7.379	0.281114	0.701911	3.75938	65534.5	C17H12.6	C17H12.6		WBGene00015932	177609_at	0.2927	0.0037	3.203	0.023514	19.416	0.301378	0.919327	2.50512	49.5915	prx-1	C11H1.4	[GO:0000166] MOLECULAR_FUNCTION nucleotide binding (IEA) | [GO:0017111] MOLECULAR_FUNCTION nucleoside-triphosphatase activity (IEA) | [GO:0005524] MOLECULAR_FUNCTION ATP binding (IEA) | [GO:0005515] MOLECULAR_FUNCTION protein binding (IEA) | [GO:0005777] CELLULAR_COMPONENT peroxisome (IEA) | [GO:0007031] BIOLOGICAL_PROCESS peroxisome organization and biogenesis (IEA) | [GO:0040010] BIOLOGICAL_PRO…	WBGene00004191
184393_at	0.48748	0.0083	5.3506	0.0081466	7.612	0.485791	0.840453	5.05182	42416.8	C33H5.13	C33H5.13		WBGene00016379	177627_at	0.30944	0.0015	5.7276	0.0012915	22.294	0.361011	0.617438	120.355	1082.1	F10A3.1	F10A3.1	[GO:0016021] CELLULAR_COMPONENT integral to membrane (IEA)	WBGene00008631
184451_at	0.50404	0.0041	4.7142	0.01297	7.494	0.46642	0.692034	2.78587	8262.39	Y57G7A.1	Y57G7A.1		WBGene00021965	177629_at	0.54291	0	9.8194	3.31e-05	6.525	0.620002	0.824632	6.37137	1481.37	ZK593.3	ZK593.3	[GO:0016021] CELLULAR_COMPONENT integral to membrane (IEA)	WBGene00014003
184458_s_at	0.50067	0.0012	4.2668	0.018378	16.985	0.396911	0.614648	4.86768	58542.8	pqn-70	T19B10.4		WBGene00004152	177671_at	0.18355	0.0127	3.2827	0.021259	22.248	0.21709	0.458083	4.29407	40.704	K03D3.2	K03D3.2		WBGene00010528
184466_s_at	0.48545	0.0009	3.7403	0.028407	16.868	0.348071	0.559966	4.62105	267386	pqn-70	T19B10.4		WBGene00004152	177681_s_at	0.41654	0.0012	5.4808	0.0016723	1.723	0.267912	0.662365	7.77428	14273.5	ZK896.5	ZK896.5		WBGene00014136
184471_at	0.47727	0.0033	3.581	0.032598	17.32	0.3394	0.672353	3.1317	5861.77	F46F11.10	F46F11.10		WBGene00018513	177693_at	0.60108	0	7.6057	0.00021056	7.595	0.43051	0.80674	9.58253	1298.97	R03G8.3	R03G8.3	[GO:0016021] CELLULAR_COMPONENT integral to membrane (IEA)	WBGene00010998
184515_s_at	0.40076	0.0078	4.4354	0.01608	18.025	0.535488	0.821196	2.73744	5729.57	F43C11.9	F43C11.9		WBGene00018386	177694_at	0.35273	0.0014	3.735	0.012137	14.384	0.289376	0.531824	7.54742	989.325	E01G4.5	E01G4.5	[GO:0004867] MOLECULAR_FUNCTION serine-type endopeptidase inhibitor activity (IEA) | [GO:0005215] MOLECULAR_FUNCTION transporter activity (IEA) | [GO:0005488] MOLECULAR_FUNCTION binding (IEA) | [GO:0006810] BIOLOGICAL_PROCESS transport (IEA)	WBGene00008447
184533_at	0.43329	0.0134	3.8698	0.025451	8.522	0.424019	0.480321	1.97854	922554	C17H12.8	C17H12.8		WBGene00015933	177700_at	0.36449	0.0014	4.5131	0.0048455	1.898	0.222621	0.460107	4.93987	51005.1	K08D8.6	K08D8.6		WBGene00010660
184629_at	0.40759	0.012	3.4796	0.035635	6.759	0.255855	0.795103	3.27332	167.676	lgc-27	Y74E4A.1	[GO:0005230] MOLECULAR_FUNCTION extracellular ligand-gated ion channel activity (IEA) | [GO:0006811] BIOLOGICAL_PROCESS ion transport (IEA) | [GO:0016021] CELLULAR_COMPONENT integral to membrane (IEA) | [GO:0045211] CELLULAR_COMPONENT postsynaptic membrane (IEA) | [GO:0006810] BIOLOGICAL_PROCESS transport (IEA) | [GO:0016020] CELLULAR_COMPONENT membrane (IEA)	WBGene00022283	177701_s_at	0.26737	0.0116	3.5398	0.01542	1.705	0.174601	0.459366	3.30778	61896.6	K08D8.6	K08D8.6		WBGene00010660
184664_at	0.44268	0.0059	3.7822	0.02741	7.751	0.396848	0.448714	5.62816	490.89	T15B12.1	T15B12.1		WBGene00020530	177707_at	0.21174	0.0176	7.5327	0.00022491	3.128	0.522217	0.902865	8.96084	4430.21	F41E7.1	F41E7.1	[GO:0016021] CELLULAR_COMPONENT integral to membrane (IEA) | [GO:0002009] BIOLOGICAL_PROCESS morphogenesis of an epithelium (IMP) | [GO:0018996] BIOLOGICAL_PROCESS molting cycle, collagen and cuticulin-based cuticle (IMP) | [GO:0040011] BIOLOGICAL_PROCESS locomotion (IMP)	WBGene00009617
184666_at	0.53676	0.0025	4.1233	0.020635	17.74	0.430301	0.48534	2.19887	9520.03	pcaf-1	Y47G6A.6	[GO:0008080] MOLECULAR_FUNCTION N-acetyltransferase activity (IEA) | [GO:0008152] BIOLOGICAL_PROCESS metabolic process (IEA) | [GO:0004402] MOLECULAR_FUNCTION histone acetyltransferase activity (IEA) | [GO:0005634] CELLULAR_COMPONENT nucleus (IEA) | [GO:0006355] BIOLOGICAL_PROCESS regulation of transcription, DNA-dependent (IEA)	WBGene00021636	177714_at	0.35388	0.0017	2.8092	0.039037	21.954	0.169478	0.609137	3.75607	71.4068	ZK896.1	ZK896.1		WBGene00014132
184707_s_at	0.32779	0.0084	3.2382	0.044265	6.698	0.272579	0.763254	6.69221	102119	dod-21	C32H11.10	[GO:0008340] BIOLOGICAL_PROCESS determination of adult life span (IMP)	WBGene00007873	177717_s_at	0.35136	0.0016	3.6931	0.012773	8.997	0.17902	0.485804	4.63509	724.462	C06C3.4	C06C3.4		WBGene00007375
184733_at	0.57011	0.0011	4.6639	0.013476	6.989	0.390871	0.84554	7.05326	514.022	cgt-1	T06C12.10	[GO:0016021] CELLULAR_COMPONENT integral to membrane (IEA)	WBGene00011517	177747_at	0.32455	0.0012	3.1732	0.024423	6.081	0.296269	0.832665	4.71096	29339.8	srm-3	F58G6.2	[GO:0016021] CELLULAR_COMPONENT integral to membrane (IEA)	WBGene00010273
184840_at	0.52541	0.0042	4.8281	0.011904	8.364	0.421247	0.935774	8.6213	3089.22	Y46G5A.20	Y46G5A.20		WBGene00012910	177752_at	0.32381	0.0036	3.7191	0.012375	12.679	0.160182	0.43148	4.10501	25.8982	fbxb-115	T26H2.2	[GO:0016021] CELLULAR_COMPONENT integral to membrane (IEA)	WBGene00012064
184845_at	0.50035	0.0016	5.9747	0.0053259	7.189	0.526871	0.770537	2.02491	32717.5	F53E10.1	F53E10.1		WBGene00018758	177772_at	0.40028	0.0007	5.9677	0.0010093	2.943	0.321006	0.743452	5.7983	7744.98	T19A6.4	T19A6.4	[GO:0016021] CELLULAR_COMPONENT integral to membrane (IEA)	WBGene00011829
184848_at	0.47407	0.0033	4.6232	0.013902	17.977	0.40231	0.68237	3.06915	7896.16	F20D12.2	F20D12.2	[GO:0009792] BIOLOGICAL_PROCESS embryonic development ending in birth or egg hatching (IMP) | [GO:0002119] BIOLOGICAL_PROCESS nematode larval development (IMP) | [GO:0010171] BIOLOGICAL_PROCESS body morphogenesis (IMP) | [GO:0000003] BIOLOGICAL_PROCESS reproduction (IMP)	WBGene00017642	177775_at	0.26461	0.0014	3.1562	0.024955	8.425	0.202008	0.838672	2.64575	78.8196	ZC373.5	ZC373.5	[GO:0046872] MOLECULAR_FUNCTION metal ion binding (IEA) | [GO:0040011] BIOLOGICAL_PROCESS locomotion (IMP)	WBGene00013870
184916_at	0.60861	0.0005	4.0344	0.022193	15.593	0.400894	0.624327	2.33457	7708.61	Y49F6B.2	Y49F6B.2	[GO:0040010] BIOLOGICAL_PROCESS positive regulation of growth rate (IMP) | [GO:0002009] BIOLOGICAL_PROCESS morphogenesis of an epithelium (IMP) | [GO:0000003] BIOLOGICAL_PROCESS reproduction (IMP) | [GO:0002119] BIOLOGICAL_PROCESS nematode larval development (IMP) | [GO:0040007] BIOLOGICAL_PROCESS growth (IMP) | [GO:0009792] BIOLOGICAL_PROCESS embryonic development ending in birth or egg hatching…	WBGene00021715	177783_at	0.62185	0	13.026	3.43e-06	7.817	0.693742	0.827333	2.98744	263420	ZK6.11	ZK6.11		WBGene00022645
184928_at	0.57243	0.0015	3.4343	0.037094	17.524	0.373982	0.546444	6.41181	1114.14	fbxc-18	C32B5.14		WBGene00016307	177785_s_at	0.24007	0.0049	4.7448	0.0037275	16.553	0.33946	0.64208	3.62	13731.3	T04D3.5	T04D3.5	[GO:0002119] BIOLOGICAL_PROCESS nematode larval development (IMP) | [GO:0040007] BIOLOGICAL_PROCESS growth (IMP) | [GO:0009792] BIOLOGICAL_PROCESS embryonic development ending in birth or egg hatching (IMP)	WBGene00011434
184930_at	0.46846	0.0045	4.5934	0.014224	19.467	0.444696	0.68717	2.05441	22648.5	dnj-9	F11G11.7	[GO:0031072] MOLECULAR_FUNCTION heat shock protein binding (IEA)	WBGene00001027	177786_at	0.24627	0.0188	3.3471	0.019604	4.897	0.186565	0.447555	2.73277	735.915	F44A6.5	F44A6.5		WBGene00009677
184984_s_at	0.60421	0.0009	4.3867	0.016707	18.612	0.536116	0.800265	1.75118	37.6369	Y73C8B.1	Y73C8B.1		WBGene00022258	177815_s_at	0.43106	0.0004	5.4111	0.0018004	4.123	0.418014	0.773097	3.79163	29468.6	E01G4.3	E01G4.3		WBGene00008446
185007_s_at	0.35828	0.0165	3.1882	0.046337	17.222	0.315442	0.43888	3.93727	72317.7	F19F10.9	F19F10.9	[GO:0009792] BIOLOGICAL_PROCESS embryonic development ending in birth or egg hatching (IMP) | [GO:0018996] BIOLOGICAL_PROCESS molting cycle, collagen and cuticulin-based cuticle (IMP) | [GO:0040011] BIOLOGICAL_PROCESS locomotion (IMP) | [GO:0040035] BIOLOGICAL_PROCESS hermaphrodite genitalia development (IMP) | [GO:0002119] BIOLOGICAL_PROCESS nematode larval development (IMP) | [GO:0040007] BIOLO…	WBGene00017605	177818_at	0.46993	0	7.8533	0.00016882	9.222	0.535848	0.765557	32.4964	5877.18	sdz-6	C43D7.5		WBGene00008068
185038_at	0.49055	0.0027	4.2546	0.018558	17.037	0.369224	0.738243	10.3968	4835.29	agt-2	F09E5.13	[GO:0009792] BIOLOGICAL_PROCESS embryonic development ending in birth or egg hatching (IMP)	WBGene00000094	177827_at	0.27105	0.0034	2.7744	0.04085	9.164	0.239785	0.485209	2.45092	61.358	T19C4.5	T19C4.5	[GO:0005506] MOLECULAR_FUNCTION iron ion binding (IEA) | [GO:0020037] MOLECULAR_FUNCTION heme binding (IEA) | [GO:0015671] BIOLOGICAL_PROCESS oxygen transport (IEA) | [GO:0019825] MOLECULAR_FUNCTION oxygen binding (IEA)	WBGene00011839
185054_at	0.31444	0.0021	3.6905	0.029645	10.508	0.344251	0.656791	2.29987	1538.2	Y71H2B.1	Y71H2B.1	[GO:0005488] MOLECULAR_FUNCTION binding (IEA)	WBGene00022191	177830_at	0.31674	0.0062	5.1762	0.0023166	15.43	0.274508	0.536692	3.24933	10694.5	F43G6.7	F43G6.7		WBGene00009659
185073_at	0.35306	0.0049	3.7705	0.027683	9.389	0.4152	0.603279	2.6876	10666.5	K07C11.3	K07C11.3	[GO:0005515] MOLECULAR_FUNCTION protein binding (IEA) | [GO:0005578] CELLULAR_COMPONENT proteinaceous extracellular matrix (IEA) | [GO:0008191] MOLECULAR_FUNCTION metalloendopeptidase inhibitor activity (IEA)	WBGene00019476	177846_at	0.45793	0	5.5601	0.0015382	23.285	0.394736	0.591602	27.2551	612.519	E04D5.4	E04D5.4		WBGene00008483
185135_at	0.39177	0.0119	3.4741	0.035808	4.91	0.299684	0.599858	1.87086	11.0093	ZC239.15	ZC239.15	[GO:0005515] MOLECULAR_FUNCTION protein binding (IEA)	WBGene00022573	177858_s_at	0.40757	0.0008	7.7341	0.00018768	9.865	0.511693	0.737018	2.35095	20775.3	F02E9.5	F02E9.5	[GO:0009792] BIOLOGICAL_PROCESS embryonic development ending in birth or egg hatching (IMP)	WBGene00008530
185173_at	0.36747	0.0091	3.3094	0.041491	8.384	0.390956	0.558942	3.3006	2473.94	F41E6.12	F41E6.12		WBGene00018293	177868_s_at	0.33235	0.004	3.2094	0.023325	0.851	0.257306	0.52066	5.52001	10870.4	T28F3.8	T28F3.8		WBGene00012134
185229_at	0.48096	0.0064	8.9611	0.00096607	8.608	0.683321	0.847776	4.16877	15140.7	Y39B6A.5	Y39B6A.5	[GO:0016021] CELLULAR_COMPONENT integral to membrane (IEA)	WBGene00012668	177876_at	0.38329	0.0011	6.0048	0.00097191	8.789	0.349595	0.643697	4.41144	14723.4	F44G4.3	F44G4.3	[GO:0016021] CELLULAR_COMPONENT integral to membrane (IEA)	WBGene00009713
185289_at	0.49329	0.005	3.2102	0.045413	16.913	0.327097	0.670275	2.40412	6590.61	C24D10.5	C24D10.5	[GO:0016021] CELLULAR_COMPONENT integral to membrane (IEA)	WBGene00016056	177903_s_at	0.36017	0.0025	5.6117	0.0014573	10.913	0.367337	0.58554	129.562	1513.94	oac-14	F09B9.1	[GO:0016747] MOLECULAR_FUNCTION transferase activity, transferring groups other than amino-acyl groups (IEA) | [GO:0016021] CELLULAR_COMPONENT integral to membrane (IEA) | [GO:0040010] BIOLOGICAL_PROCESS positive regulation of growth rate (IMP)	WBGene00008602
185293_at	0.5702	0.0006	6.562	0.0036601	18.094	0.563932	0.756342	3.30509	8977.43	flh-3	Y11D7A.13		WBGene00012436	177916_at	0.23495	0.0154	2.8512	0.036958	0.305	0.194205	0.639557	12.7989	68.1416	lpr-4	W04G3.3	[GO:0005488] MOLECULAR_FUNCTION binding (IEA) | [GO:0040011] BIOLOGICAL_PROCESS locomotion (IMP)	WBGene00012257
185295_s_at	0.49582	0.0001	7.1457	0.002575	8.526	0.616272	0.670292	3.65458	11211.5	C01B10.3	C01B10.3		WBGene00015278	177923_at	0.36138	0.0007	5.42	0.0017835	19.778	0.313744	0.701117	3.73539	4105.81	R13H4.5	R13H4.5		WBGene00011263
185357_at	0.4374	0.0126	4.6869	0.013242	7.467	0.444611	0.842004	4.90515	59926.2	Y37D8A.16	Y37D8A.16	[GO:0016021] CELLULAR_COMPONENT integral to membrane (IEA) | [GO:0040010] BIOLOGICAL_PROCESS positive regulation of growth rate (IMP) | [GO:0002119] BIOLOGICAL_PROCESS nematode larval development (IMP) | [GO:0040007] BIOLOGICAL_PROCESS growth (IMP) | [GO:0040011] BIOLOGICAL_PROCESS locomotion (IMP)	WBGene00012554	177936_s_at	0.48879	0	5.8151	0.0011799	21.783	0.511615	0.719028	3.55749	141292	Y7A5A.1	Y7A5A.1	[GO:0003824] MOLECULAR_FUNCTION catalytic activity (IEA) | [GO:0050660] MOLECULAR_FUNCTION FAD binding (IEA) | [GO:0016021] CELLULAR_COMPONENT integral to membrane (IEA)	WBGene00012407
185395_at	0.54231	0.0037	6.2061	0.0045819	16.712	0.563444	0.713237	2.98973	41041	C17G10.1	C17G10.1	[GO:0008152] BIOLOGICAL_PROCESS metabolic process (IEA) | [GO:0016491] MOLECULAR_FUNCTION oxidoreductase activity (IEA) | [GO:0005506] MOLECULAR_FUNCTION iron ion binding (IEA) | [GO:0016706] MOLECULAR_FUNCTION oxidoreductase activity, acting on paired donors, with incorporation or reduction of molecular oxygen, 2-oxoglutarate as one donor, and incorporation of one atom each of oxygen into both d…	WBGene00015915	177945_s_at	0.42896	0.0002	4.5509	0.0046407	12.402	0.310962	0.71425	3.78072	439.409	F36D1.1	F36D1.1		WBGene00009461
185402_at	0.56395	0.0014	3.6097	0.031793	7.381	0.340192	0.683472	4.15259	817.68	W02C12.2	W02C12.2	[GO:0016021] CELLULAR_COMPONENT integral to membrane (IEA)	WBGene00020929	177950_s_at	0.34649	0.0035	3.8015	0.011195	17.299	0.217854	0.827655	3.64815	40345.4	mdt-28	W01A8.1		WBGene00007024
185404_s_at	0.47101	0.0007	3.5407	0.033767	17.125	0.340435	0.421124	7.39973	53.8139	Y38E10A.3	Y38E10A.3	[GO:0040035] BIOLOGICAL_PROCESS hermaphrodite genitalia development (IMP)	WBGene00012581	177970_at	0.28044	0.0098	2.723	0.043698	19.618	0.206475	0.841838	2.9361	9236.7	F33H2.6	F33H2.6	[GO:0005488] MOLECULAR_FUNCTION binding (IEA) | [GO:0045132] BIOLOGICAL_PROCESS meiotic chromosome segregation (IMP)	WBGene00009369
185458_s_at	0.46883	0.0022	4.6797	0.013315	17.101	0.485017	0.778001	5.44294	2589.65	F19B10.2	F19B10.2		WBGene00017584	177978_at	0.33783	0	4.1663	0.0072434	7.326	0.338658	0.712447	3.50018	203279	dct-18	F58G1.4	[GO:0040010] BIOLOGICAL_PROCESS positive regulation of growth rate (IMP)	WBGene00010266
185472_at	0.46726	0.0031	3.2112	0.045372	20.914	0.297781	0.515603	2.00693	42.8657	pph-5	Y39B6A.2	[GO:0016787] MOLECULAR_FUNCTION hydrolase activity (IEA) | [GO:0004721] MOLECULAR_FUNCTION phosphoprotein phosphatase activity (IEA) | [GO:0005634] CELLULAR_COMPONENT nucleus (IEA) | [GO:0005737] CELLULAR_COMPONENT cytoplasm (IEA) | [GO:0006470] BIOLOGICAL_PROCESS protein amino acid dephosphorylation (IEA) | [GO:0005488] MOLECULAR_FUNCTION binding (IEA)	WBGene00012665	178023_s_at	0.40195	0.0001	4.4441	0.0052446	12.222	0.248799	0.851296	2.55282	7276.1	K09E4.3	K09E4.3		WBGene00010721
185577_s_at	0.28462	0.0164	3.503	0.034904	18.143	0.362179	0.555499	3.72839	4998.1	sea-1	F19B10.9	[GO:0042464] BIOLOGICAL_PROCESS dosage compensation, by hypoactivation of X chromosome (IGI) via [WBPaper00026779] Powell JR et al. (2005) | [GO:0007530] BIOLOGICAL_PROCESS sex determination (IGI) via [WBPaper00026779] Powell JR et al. (2005) | [GO:0045944] BIOLOGICAL_PROCESS positive regulation of transcription from RNA polymerase II promoter (IMP) via [WBPaper00026779] Powell JR et al. (2005) |…	WBGene00004750	178024_at	0.28658	0.0047	3.7469	0.011962	10.535	0.0516006	0.330395	2.2369	18.1449	F19B2.6	F19B2.6		WBGene00008945
185579_at	0.39134	0.0092	4.6799	0.013312	19.537	0.488731	0.604847	4.94854	2764.36	R09F10.8	R09F10.8	[GO:0009792] BIOLOGICAL_PROCESS embryonic development ending in birth or egg hatching (IMP)	WBGene00019989	178031_at	0.28615	0.006	5.7787	0.001225	18.128	0.429538	0.846982	3.40586	1418.77	C27H2.2	C27H2.2		WBGene00007782
185583_at	0.38783	0.0167	5.3761	0.0080018	7.103	0.487152	0.776435	3.4885	12038	H06H21.8	H06H21.8		WBGene00019164	178044_at	0.3478	0.0009	3.3486	0.019569	20.687	0.457635	0.797737	2.48893	36.2517	gei-3	T22H6.6	[GO:0003677] MOLECULAR_FUNCTION DNA binding (IEA) | [GO:0006355] BIOLOGICAL_PROCESS regulation of transcription, DNA-dependent (IEA)	WBGene00001560
185590_s_at	0.34389	0.0054	5.0439	0.01015	18.649	0.523227	0.62243	3.12631	2379.49	C45H4.14	C45H4.14		WBGene00016695	178065_at	0.33359	0.0035	4.915	0.0030836	19.301	0.357703	0.674306	7.75107	965.448	T21H8.1	T21H8.1	[GO:0016043] BIOLOGICAL_PROCESS cellular component organization and biogenesis (ISS) via [WBPaper00003493] Serra-Pages C et al. (1998) | [GO:0005886] CELLULAR_COMPONENT plasma membrane (ISS) via [WBPaper00003493] Serra-Pages C et al. (1998) | [GO:0008022] MOLECULAR_FUNCTION protein C-terminus binding (ISS) via [WBPaper00003493] Serra-Pages C et al. (1998) | [GO:0042803] MOLECULAR_FUNCTION protein…	WBGene00011904
185649_at	0.43011	0.0128	6.046	0.0050828	7.253	0.597232	0.745028	3.50592	535.097	K02E10.6	K02E10.6		WBGene00019320	178082_s_at	0.31147	0.0058	3.7319	0.012182	17.658	0.394571	0.769905	3.60119	1587.46	lst-2	R160.7	[GO:0032266] MOLECULAR_FUNCTION phosphatidylinositol 3-phosphate binding (ISS) via [WBPaper00028279] Hayakawa A et al. (2006)	WBGene00003084
185661_at	0.50547	0.0041	4.2324	0.018892	6.377	0.415308	0.673478	2.7378	2403.94	H06I04.6	H06I04.6		WBGene00019170	178087_s_at	0.47503	0.0001	5.8975	0.0010842	2.333	0.325208	0.6098	6.78565	64.8864	lys-5	F58B3.2	[GO:0003796] MOLECULAR_FUNCTION lysozyme activity (IEA) | [GO:0009253] BIOLOGICAL_PROCESS peptidoglycan catabolic process (IEA) | [GO:0016998] BIOLOGICAL_PROCESS cell wall catabolic process (IEA) | [GO:0003824] MOLECULAR_FUNCTION catalytic activity (IEA) | [GO:0005975] BIOLOGICAL_PROCESS carbohydrate metabolic process (IEA) | [GO:0043169] MOLECULAR_FUNCTION cation binding (IEA)	WBGene00003094
185688_at	0.38707	0.0008	3.54	0.033789	17.115	0.400639	0.567203	2.83433	132.054	Y106G6H.9	Y106G6H.9		WBGene00013721	178089_at	0.30569	0.0055	3.1153	0.026291	22.768	0.244014	0.501838	4.28892	290.044	K03B8.6	K03B8.6	[GO:0003824] MOLECULAR_FUNCTION catalytic activity (IEA) | [GO:0046872] MOLECULAR_FUNCTION metal ion binding (IEA)	WBGene00010524
185758_at	0.39522	0.0121	3.51	0.034689	6.161	0.493557	0.760684	2.64848	6717.88	hex-2	C14C11.3	[GO:0003824] MOLECULAR_FUNCTION catalytic activity (IEA) | [GO:0005975] BIOLOGICAL_PROCESS carbohydrate metabolic process (IEA) | [GO:0043169] MOLECULAR_FUNCTION cation binding (IEA) | [GO:0016021] CELLULAR_COMPONENT integral to membrane (IEA)	WBGene00015767	178091_at	0.38935	0.0004	4.3793	0.0056507	9.803	0.362795	0.858718	3.2583	15.9525	fbxa-188	F47H4.8		WBGene00009839
185761_s_at	0.48254	0.0045	4.2724	0.018295	17.397	0.434953	0.505371	2.78992	8676.19	K08D10.1	K08D10.1		WBGene00019528	178189_at	0.30546	0.0027	5.1695	0.0023336	2.954	0.29062	0.502432	2.10488	72.5301	F28C6.5	F28C6.5	[GO:0001703] BIOLOGICAL_PROCESS gastrulation with mouth forming first (IMP) | [GO:0009795] BIOLOGICAL_PROCESS embryonic development (IMP)	WBGene00009205
185774_s_at	0.38274	0.006	4.0697	0.02156	7.142	0.412712	0.559905	3.75586	101800	spp-8	C28C12.5		WBGene00004993	178203_at	0.64587	0	10.8572	1.52e-05	17.948	0.579873	0.702599	8.9187	4059.39	vet-6	F44F1.7		WBGene00006902
185811_at	0.33461	0.0018	5.0435	0.010153	9.766	0.514946	0.645656	1.98102	202935	Y71H2B.4	Y71H2B.4		WBGene00022194	178232_at	0.47084	0.0001	6.5228	0.0005807	8.165	0.42686	0.639906	4.5775	1929.12	M02B1.2	M02B1.2	[GO:0016021] CELLULAR_COMPONENT integral to membrane (IEA)	WBGene00010827
185827_at	0.50731	0.0053	3.1816	0.046618	16.273	0.338576	0.568011	6.44932	17987.2	mau-8	Y62E10A.8		WBGene00003142	178236_s_at	0.52641	0	6.8182	0.00043676	1.756	0.506802	0.896248	10.7423	358898	lys-4	F58B3.1	[GO:0003796] MOLECULAR_FUNCTION lysozyme activity (IEA) | [GO:0009253] BIOLOGICAL_PROCESS peptidoglycan catabolic process (IEA) | [GO:0016998] BIOLOGICAL_PROCESS cell wall catabolic process (IEA) | [GO:0003824] MOLECULAR_FUNCTION catalytic activity (IEA) | [GO:0005975] BIOLOGICAL_PROCESS carbohydrate metabolic process (IEA) | [GO:0043169] MOLECULAR_FUNCTION cation binding (IEA)	WBGene00003093
185837_at	0.54649	0.0027	5.2098	0.0090032	5.438	0.508564	0.616572	2.32571	669.862	F21C10.4	F21C10.4	[GO:0016021] CELLULAR_COMPONENT integral to membrane (IEA)	WBGene00017654	178264_at	0.5607	0	10.687	1.72e-05	20.925	0.490067	0.763242	9.20869	1856.76	F01D5.8	F01D5.8		WBGene00008498
185845_at	0.44383	0.0152	3.2103	0.045406	17.626	0.338467	0.367657	2.13025	58374.2	Y24F12A.1	Y24F12A.1	[GO:0016888] MOLECULAR_FUNCTION endodeoxyribonuclease activity, producing 5'-phosphomonoesters (IEA)	WBGene00012496	178276_at	0.27632	0.0086	2.8537	0.036835	8.607	0.0928176	0.276364	4.09385	49174	C07H4.1	C07H4.1	[GO:0016021] CELLULAR_COMPONENT integral to membrane (IEA)	WBGene00007421
185864_at	0.54632	0.002	5.2987	0.0084512	6.839	0.51368	0.746172	3.36741	11465.7	srr-4	K11D12.3	[GO:0016021] CELLULAR_COMPONENT integral to membrane (IEA)	WBGene00005655	178302_at	0.44045	0.0002	5.3801	0.001861	5.411	0.422558	0.812673	5.00962	2828.46	F58B4.5	F58B4.5		WBGene00010238
185875_at	0.5062	0.0022	3.4076	0.03799	20.798	0.37729	0.412861	2.34766	2259.18	C09H10.10	C09H10.10	[GO:0009792] BIOLOGICAL_PROCESS embryonic development ending in birth or egg hatching (IMP) | [GO:0002119] BIOLOGICAL_PROCESS nematode larval development (IMP) | [GO:0040007] BIOLOGICAL_PROCESS growth (IMP) | [GO:0000003] BIOLOGICAL_PROCESS reproduction (IMP) | [GO:0018996] BIOLOGICAL_PROCESS molting cycle, collagen and cuticulin-based cuticle (IMP)	WBGene00007504	178322_at	0.43839	0.0005	9.0195	6.26e-05	23.455	0.46462	0.724201	10.5422	4848.6	ZK856.5	ZK856.5		WBGene00014106
185898_at	0.47294	0.0021	4.056	0.021803	6.719	0.408689	0.544299	1.8565	577583	spp-10	C28C12.7	[GO:0005764] CELLULAR_COMPONENT lysosome (IEA) | [GO:0006665] BIOLOGICAL_PROCESS sphingolipid metabolic process (IEA)	WBGene00004995	178327_s_at	0.38807	0.0014	3.8562	0.010479	6.69	0.402614	0.658938	3.17214	3970.64	acl-5	R07E3.5	[GO:0008152] BIOLOGICAL_PROCESS metabolic process (IEA) | [GO:0008415] MOLECULAR_FUNCTION acyltransferase activity (IEA) | [GO:0016021] CELLULAR_COMPONENT integral to membrane (IEA)	WBGene00011106
185943_at	0.37062	0.0067	3.9633	0.023539	16.489	0.372769	0.570468	2.48216	19481.8	F57B10.4	F57B10.4		WBGene00019002	178340_at	0.30218	0.0025	2.9403	0.032925	9.254	0.156283	0.719878	4.95685	678.941	K08H2.3	K08H2.3		WBGene00010690
185954_at	0.46413	0.0042	3.5194	0.034404	4.813	0.39886	0.43316	3.04681	15701.9	Y54G11A.7	Y54G11A.7	[GO:0005488] MOLECULAR_FUNCTION binding (IEA) | [GO:0009792] BIOLOGICAL_PROCESS embryonic development ending in birth or egg hatching (IMP)	WBGene00013216	178345_at	0.38074	0.0003	4.7482	0.0037132	16.717	0.347936	0.92966	2.67614	42.1522	pqn-36	F39D8.1		WBGene00004123
185977_s_at	0.73884	0	8.9314	0.0009805	16.664	0.661483	0.870452	2.67705	40302.5	C02B10.2	C02B10.2	[GO:0009792] BIOLOGICAL_PROCESS embryonic development ending in birth or egg hatching (IMP)	WBGene00015327	178355_at	0.36001	0.0027	4.3817	0.0056356	7.264	0.34842	0.804208	5.75787	269.035	C29F7.1	C29F7.1		WBGene00007810
186013_at	0.4842	0.0051	3.541	0.033758	20.415	0.364834	0.680242	1.70137	9043.91	Y87G2A.11	Y87G2A.11		WBGene00013599	178364_at	0.2739	0.0106	3.1391	0.025506	11.411	0.28995	0.769555	4.7629	2696.7	tbx-36	ZK829.5	[GO:0003700] MOLECULAR_FUNCTION transcription factor activity (IEA) | [GO:0005634] CELLULAR_COMPONENT nucleus (IEA) | [GO:0006355] BIOLOGICAL_PROCESS regulation of transcription, DNA-dependent (IEA)	WBGene00006555
186024_s_at	0.34113	0.0085	3.3373	0.040462	7.447	0.344483	0.531884	3.92088	99640	K11D12.7	K11D12.7	[GO:0004867] MOLECULAR_FUNCTION serine-type endopeptidase inhibitor activity (IEA)	WBGene00019647186024_s_at	178365_s_at	0.26353	0.0092	3.9149	0.0097643	17.512	0.208381	0.564476	2.31514	911.879	F59F4.3	F59F4.3	[GO:0016021] CELLULAR_COMPONENT integral to membrane (IEA)	WBGene00010338
186034_at	0.42522	0.0065	3.1504	0.047979	18.272	0.339048	0.614089	1.76377	99283.8	Y102E9.2	Y102E9.2		WBGene00022420	178392_s_at	0.30812	0.0068	3.9856	0.0089723	17.322	0.181118	0.537885	3.32877	693.573	K02B7.2	K02B7.2		WBGene00010490
186096_at	0.39645	0.0053	4.6693	0.013421	7.799	0.43234	0.615109	3.79699	77398.6	C41G11.1	C41G11.1	[GO:0016021] CELLULAR_COMPONENT integral to membrane (IEA)	WBGene00016568	178393_at	0.37237	0.0017	5.1942	0.0022719	9.319	0.362609	0.59411	3.05493	1239.66	ZK899.1	ZK899.1		WBGene00014140
186127_at	0.38045	0.0051	3.2717	0.042935	6.641	0.355566	0.409336	3.9596	66281.7	tag-18	T14G12.3		WBGene00006408	178405_at	0.24626	0.0065	2.6493	0.048144	20.689	0.0130624	0.370056	3.58349	580.734	C05G5.1	C05G5.1	[GO:0016021] CELLULAR_COMPONENT integral to membrane (IEA)	WBGene00007347
186255_at	0.50376	0.0019	3.5807	0.032605	17.002	0.298086	0.771281	9.18026	67.1673	F39H12.1	F39H12.1		WBGene00018212	178409_s_at	0.50282	0	5.2969	0.0020341	3.316	0.364621	0.797225	5.64732	199.389	lys-6	F58B3.3	[GO:0003796] MOLECULAR_FUNCTION lysozyme activity (IEA) | [GO:0009253] BIOLOGICAL_PROCESS peptidoglycan catabolic process (IEA) | [GO:0016998] BIOLOGICAL_PROCESS cell wall catabolic process (IEA) | [GO:0003824] MOLECULAR_FUNCTION catalytic activity (IEA) | [GO:0005975] BIOLOGICAL_PROCESS carbohydrate metabolic process (IEA) | [GO:0043169] MOLECULAR_FUNCTION cation binding (IEA)	WBGene00003095
186335_at	0.46658	0.0017	6.2148	0.0045563	19.405	0.572262	0.83664	2.11649	105152	Y51H7C.3	Y51H7C.3		WBGene00021781	178432_s_at	0.31116	0.0015	2.9653	0.031877	9.303	0.175932	0.560404	6.10048	835.252	ZC443.3	ZC443.3		WBGene00013898
186343_s_at	0.40432	0.0113	4.6978	0.013132	5.936	0.478009	0.685213	2.15868	4080.61	Y54E5A.8	Y54E5A.8	[GO:0016021] CELLULAR_COMPONENT integral to membrane (IEA)	WBGene00013203	178433_at	0.22475	0.0189	4.4527	0.0051926	2.344	0.32027	0.739321	11.0015	56.4639	C01G6.9	C01G6.9		WBGene00007229
186388_s_at	0.37981	0.0099	3.7934	0.02715	18.136	0.350558	0.602061	2.248	4620.36	C56G2.15	C56G2.15	[GO:0008080] MOLECULAR_FUNCTION N-acetyltransferase activity (IEA) | [GO:0008152] BIOLOGICAL_PROCESS metabolic process (IEA)	WBGene00016983	178450_at	0.28939	0.0082	2.6515	0.048006	16.822	0.154559	0.763905	2.67532	8391.23	D1043.1	D1043.1	[GO:0009792] BIOLOGICAL_PROCESS embryonic development ending in birth or egg hatching (IMP) | [GO:0010171] BIOLOGICAL_PROCESS body morphogenesis (IMP) | [GO:0040011] BIOLOGICAL_PROCESS locomotion (IMP) | [GO:0002119] BIOLOGICAL_PROCESS nematode larval development (IMP) | [GO:0040007] BIOLOGICAL_PROCESS growth (IMP)	WBGene00008361
186427_at	0.5018	0.0056	3.2766	0.042744	17.33	0.36033	0.489677	2.24581	175671	T05H4.11	T05H4.11		WBGene00020274	178464_at	0.50129	0	10.7257	1.67e-05	19.848	0.570734	0.909048	18.1556	1200.14	R193.2	R193.2	[GO:0040010] BIOLOGICAL_PROCESS positive regulation of growth rate (IMP)	WBGene00020128
186444_s_at	0.51461	0.0037	3.7823	0.027406	7.736	0.330168	0.82525	4.38971	19112.1	ZK1055.7	ZK1055.7		WBGene00022848	178494_at	0.22892	0.0039	3.2884	0.021106	17.534	0.198244	0.509328	2.80153	1742.91	C27D8.3	C27D8.3		WBGene00007779
186460_s_at	0.44136	0.0099	3.1093	0.049842	17.188	0.334781	0.555899	1.7919	2.36574e+06	cey-3	M01E11.5	[GO:0003677] MOLECULAR_FUNCTION DNA binding (IEA) | [GO:0006355] BIOLOGICAL_PROCESS regulation of transcription, DNA-dependent (IEA) | [GO:0003676] MOLECULAR_FUNCTION nucleic acid binding (IEA)	WBGene00000474	178508_at	0.36109	0.0016	5.6512	0.0013983	2.174	0.278925	0.674785	101.336	782.164	C14A4.9	C14A4.9		WBGene00007560
186531_at	0.55493	0.0019	4.4754	0.015585	8.109	0.409348	0.571282	3.16406	637.436	Y37E11B.7	Y37E11B.7		WBGene00021379	178517_at	0.27831	0.0088	3.886	0.01011	7.178	0.160147	0.710344	16.8835	1536.91	C49F8.3	C49F8.3		WBGene00008215
186581_at	0.45699	0.011	3.8115	0.026737	6.958	0.414189	0.616666	2.93732	4358.38	Y116F11A.6	Y116F11A.6		WBGene00013819	178560_at	0.22874	0.0097	2.6729	0.046674	18.782	0.00288221	0.151316	4.28674	471.664	F55G7.2	F55G7.2	[GO:0018024] MOLECULAR_FUNCTION histone-lysine N-methyltransferase activity (IEA)	WBGene00010120
186582_s_at	0.62234	0.0002	5.0442	0.010148	17.234	0.522734	0.721512	2.00449	24067.6	mis-12	Y47G6A.24	[GO:0009792] BIOLOGICAL_PROCESS embryonic development ending in birth or egg hatching (IMP) | [GO:0007052] BIOLOGICAL_PROCESS mitotic spindle organization and biogenesis (IMP)	WBGene00021648	178563_at	0.3922	0	4.684	0.0039911	5.626	0.282035	0.917577	204.889	1249.6	T16G1.6	T16G1.6	[GO:0040010] BIOLOGICAL_PROCESS positive regulation of growth rate (IMP)	WBGene00011800
186612_at	0.38705	0.0084	3.9865	0.02309	8.842	0.404191	0.532786	4.36347	250.097	fbxa-90	Y102A5C.19		WBGene00013623	178566_at	0.26152	0.0075	2.8836	0.035435	4.776	0.0892002	0.329652	1.68822	21.9958	del-3	F26A3.6	[GO:0016021] CELLULAR_COMPONENT integral to membrane (IEA)	WBGene00009144
186698_s_at	0.49015	0.0021	7.8641	0.0017142	20.514	0.604039	0.865156	2.13676	3939.97	cdc-14	C17G10.4	[GO:0030496] CELLULAR_COMPONENT midbody (IDA) via [WBPaper00005453] Gruneberg U et al. (2002) | [GO:0005819] CELLULAR_COMPONENT spindle (IDA) via [WBPaper00005453] Gruneberg U et al. (2002) | [GO:0006470] BIOLOGICAL_PROCESS protein amino acid dephosphorylation (IEA) | [GO:0008138] MOLECULAR_FUNCTION protein tyrosine/serine/threonine phosphatase activity (IEA) | [GO:0016311] BIOLOGICAL_PROCESS dep…	WBGene00000383	178570_s_at	0.23981	0.0121	3.1236	0.026016	17.994	0.157416	0.495598	3.74195	4027.27	T28F4.1	T28F4.1		WBGene00012136
186773_s_at	0.49186	0.0055	3.844	0.026011	6.108	0.393128	0.461193	3.30307	28736.2	cab-1	C23H4.1	[GO:0007268] BIOLOGICAL_PROCESS synaptic transmission (IMP) via [WBPaper00004331] Iwasaki K et al. (2000) | [GO:0005623] CELLULAR_COMPONENT cell (IDA) via [WBPaper00004331] Iwasaki K et al. (2000) | [GO:0016021] CELLULAR_COMPONENT integral to membrane (IEA) | [GO:0009792] BIOLOGICAL_PROCESS embryonic development ending in birth or egg hatching (IMP) | [GO:0002119] BIOLOGICAL_PROCESS nematode larv…	WBGene00000277	178586_at	0.2421	0.0022	5.055	0.0026436	21.516	0.219651	0.894366	1.7101	11.6019	srr-1	W07G4.6	[GO:0016021] CELLULAR_COMPONENT integral to membrane (IEA)	WBGene00005652
186776_at	0.56083	0.0026	3.9543	0.023715	16.89	0.338775	0.852764	5.82764	4951.69	ZK673.3	ZK673.3	[GO:0009792] BIOLOGICAL_PROCESS embryonic development ending in birth or egg hatching (IMP)	WBGene00014059	178588_s_at	0.32993	0.002	6.4951	0.00059656	20.181	0.388355	0.669276	2.06887	424.234	amx-2	B0019.1	[GO:0009055] MOLECULAR_FUNCTION electron carrier activity (IEA) | [GO:0016491] MOLECULAR_FUNCTION oxidoreductase activity (IEA) | [GO:0003824] MOLECULAR_FUNCTION catalytic activity (IEA) | [GO:0005488] MOLECULAR_FUNCTION binding (IEA) | [GO:0008152] BIOLOGICAL_PROCESS metabolic process (IEA)	WBGene00000138
186825_at	0.54878	0.003	3.2958	0.042005	16.684	0.303345	0.732937	4.8584	80290.8	C43E11.12	C43E11.12		WBGene00016609	178599_at	0.25792	0.0077	5.3164	0.0019919	11.102	0.35041	0.862141	24.6072	146.426	spp-12	T22G5.7	[GO:0008340] BIOLOGICAL_PROCESS determination of adult life span (IMP)	WBGene00004997
186837_at	0.42003	0.0142	5.4709	0.0074888	21.372	0.468249	0.787583	2.40358	105674	acs-13	Y65B4BL.5	[GO:0003824] MOLECULAR_FUNCTION catalytic activity (IEA) | [GO:0008152] BIOLOGICAL_PROCESS metabolic process (IEA)	WBGene00022037	178600_at	0.52966	0	8.1171	0.00013396	9.499	0.420125	0.581238	3.16758	7880.59	F26E4.2	F26E4.2	[GO:0016021] CELLULAR_COMPONENT integral to membrane (IEA) | [GO:0007052] BIOLOGICAL_PROCESS mitotic spindle organization and biogenesis (IMP) | [GO:0040026] BIOLOGICAL_PROCESS positive regulation of vulval development (IMP)	WBGene00009157
186880_at	0.65896	0	11.0078	0.0003758	8.204	0.718063	0.826433	2.90216	7092.35	C25E10.10	C25E10.10		WBGene00016099	178613_at	0.3755	0.0022	3.0332	0.029208	11.071	0.138015	0.468207	4.99102	1939.99	F36F2.2	F36F2.2		WBGene00009476
186888_s_at	0.48755	0.0088	4.8515	0.011698	21.574	0.483368	0.562112	1.62236	96094.1	eif-3.C	T23D8.4	[GO:0003743] MOLECULAR_FUNCTION translation initiation factor activity (IEA) | [GO:0005852] CELLULAR_COMPONENT eukaryotic translation initiation factor 3 complex (IEA) | [GO:0006413] BIOLOGICAL_PROCESS translational initiation (IEA) | [GO:0000003] BIOLOGICAL_PROCESS reproduction (IMP)	WBGene00001226	178615_s_at	0.48387	0.0002	9.5851	3.98e-05	19.63	0.496413	0.895277	4.0877	14733.2	T12G3.2	T12G3.2		WBGene00011738
186963_s_at	0.48427	0.0082	4.1954	0.019463	17.395	0.440419	0.61855	2.37648	3635.65	B0285.3	B0285.3		WBGene00007136	178619_at	0.28731	0	9.8774	3.17e-05	3.173	0.590936	0.882066	10.8926	376.862	C55A1.6	C55A1.6	[GO:0016021] CELLULAR_COMPONENT integral to membrane (IEA)	WBGene00008323
186969_at	0.45046	0.0042	4.543	0.014788	7.213	0.453642	0.642939	4.71694	20133.9	Y116A8C.29	Y116A8C.29	[GO:0016021] CELLULAR_COMPONENT integral to membrane (IEA)	WBGene00013806	178689_at	0.35404	0.0018	3.9188	0.0097188	2.816	0.339844	0.90956	19.4325	141.486	ins-33	W09C5.4	[GO:0005179] MOLECULAR_FUNCTION hormone activity (IEA) | [GO:0005576] CELLULAR_COMPONENT extracellular region (IEA) | [GO:0016021] CELLULAR_COMPONENT integral to membrane (IEA) | [GO:0040010] BIOLOGICAL_PROCESS positive regulation of growth rate (IMP) | [GO:0009792] BIOLOGICAL_PROCESS embryonic development ending in birth or egg hatching (IMP) | [GO:0040011] BIOLOGICAL_PROCESS locomotion (IMP)	WBGene00002116
186981_s_at	0.51825	0.0037	4.1202	0.020687	16.736	0.408596	0.53219	4.01207	30159.3	ZK643.5	ZK643.5		WBGene00014036	178718_at	0.31615	0.0059	3.5977	0.014358	3.962	0.159488	0.35147	3.14971	107.008	set-18	T22A3.4	[GO:0008270] MOLECULAR_FUNCTION zinc ion binding (IEA)	WBGene00044070
187013_at	0.49986	0.0057	3.3933	0.038476	7.449	0.324728	0.723815	3.08551	6576.72	Y77E11A.2	Y77E11A.2	[GO:0003951] MOLECULAR_FUNCTION NAD+ kinase activity (IEA) | [GO:0008152] BIOLOGICAL_PROCESS metabolic process (IEA)	WBGene00022307	178734_at	0.27006	0.0135	2.9367	0.033078	19.126	0.25047	0.464837	14.1986	144.496	fbxb-9	C08F8.5		WBGene00007447
187019_at	0.56143	0.0021	7.3691	0.0022625	7.794	0.571276	0.876453	5.35885	4559.36	F37C12.10	F37C12.10	[GO:0016021] CELLULAR_COMPONENT integral to membrane (IEA) | [GO:0040010] BIOLOGICAL_PROCESS positive regulation of growth rate (IMP)	WBGene00018153	178753_at	0.49652	0	6.6086	0.00053423	9.887	0.384794	0.576729	5.07108	1409.17	F28H6.4	F28H6.4	[GO:0003677] MOLECULAR_FUNCTION DNA binding (IEA) | [GO:0045449] BIOLOGICAL_PROCESS regulation of transcription (IEA)	WBGene00009233
187079_at	0.50578	0.0028	5.8178	0.0059106	17.792	0.473636	0.892664	2.04277	20765.9	Y57G11C.33	Y57G11C.33		WBGene00013323	178755_s_at	0.37994	0.0014	3.3812	0.018784	20.251	0.503485	0.912663	7.31617	1960.11	C25F9.5	C25F9.5		WBGene00007725
187134_s_at	0.33288	0.0136	4.268	0.01836	19.696	0.439315	0.49016	4.86679	869.857	Y75D11A.3	Y75D11A.3		WBGene00022292	178793_s_at	0.29916	0.0094	3.0033	0.030352	18.532	0.100066	0.674633	10.332	2354.69	W04A8.5	W04A8.5		WBGene00012240
187153_s_at	0.61323	0.0017	6.1741	0.0046772	6.482	0.594801	0.776978	3.00304	7170.46	clp-4	Y39A3CL.5	[GO:0004197] MOLECULAR_FUNCTION cysteine-type endopeptidase activity (IEA) | [GO:0006508] BIOLOGICAL_PROCESS proteolysis (IEA) | [GO:0004198] MOLECULAR_FUNCTION calcium-dependent cysteine-type endopeptidase activity (IEA) | [GO:0005622] CELLULAR_COMPONENT intracellular (IEA)	WBGene00000545	178797_at	0.25283	0.015	2.6269	0.04959	19.789	0.202426	0.612592	2.25803	393078	C49F5.7	C49F5.7		WBGene00008211
187241_s_at	0.52577	0.0022	3.3664	0.039416	16.609	0.344364	0.590854	8.4806	10775.6	ccdc-55	C16C10.6	[GO:0009792] BIOLOGICAL_PROCESS embryonic development ending in birth or egg hatching (IMP) | [GO:0040010] BIOLOGICAL_PROCESS positive regulation of growth rate (IMP) | [GO:0002119] BIOLOGICAL_PROCESS nematode larval development (IMP) | [GO:0040007] BIOLOGICAL_PROCESS growth (IMP)	WBGene00007627	178799_at	0.31848	0.0053	2.8703	0.036053	4.037	0.0234556	0.606702	4.38228	2701.09	F14D7.7	F14D7.7		WBGene00008794
187272_s_at	0.56234	0.0011	5.0825	0.0098687	15.951	0.46104	0.771734	4.39987	10939.5	F44E2.7	F44E2.7	[GO:0005622] CELLULAR_COMPONENT intracellular (IEA) | [GO:0008270] MOLECULAR_FUNCTION zinc ion binding (IEA)	WBGene00018420	178804_at	0.34763	0.0017	5.1326	0.002429	6.639	0.360302	0.518238	3.82533	6168.74	F57B1.5	F57B1.5	[GO:0016021] CELLULAR_COMPONENT integral to membrane (IEA)	WBGene00010188
187284_at	0.41989	0.0148	7.5123	0.0020851	7.86	0.644981	0.777489	2.80182	511.64	C34C12.7	C34C12.7		WBGene00007926	178848_at	0.68301	0	17.2416	2.95e-07	23.329	0.700207	0.874032	11.5308	4670.11	str-245	F32A7.7	[GO:0016021] CELLULAR_COMPONENT integral to membrane (IEA) | [GO:0040011] BIOLOGICAL_PROCESS locomotion (IMP)	WBGene00006272
187296_at	0.62311	0.0003	4.4889	0.015422	15.921	0.387507	0.824891	3.53582	13498.9	lin-52	ZK632.13	[GO:0009790] BIOLOGICAL_PROCESS embryonic development (IMP) via [WBPaper00005861] Thomas JH et al. (2003) | [GO:0009968] BIOLOGICAL_PROCESS negative regulation of signal transduction (IMP) via [WBPaper00005861] Thomas JH et al. (2003) | [GO:0002119] BIOLOGICAL_PROCESS nematode larval development (IMP) | [GO:0040007] BIOLOGICAL_PROCESS growth (IMP) | [GO:0018991] BIOLOGICAL_PROCESS oviposition (IM…	WBGene00003035	178928_s_at	0.28049	0.0061	3.7984	0.011237	20.972	0.39652	0.730553	2.40667	102.456	F39B2.8	F39B2.8	[GO:0004930] MOLECULAR_FUNCTION G-protein coupled receptor activity (IEA) | [GO:0007186] BIOLOGICAL_PROCESS G-protein coupled receptor protein signaling pathway (IEA) | [GO:0016021] CELLULAR_COMPONENT integral to membrane (IEA)	WBGene00009558
187318_at	0.49801	0.0011	5.1368	0.0094887	6.507	0.503709	0.549202	2.60946	58715.2	lon-1	F48E8.1	[GO:0040015] BIOLOGICAL_PROCESS negative regulation of multicellular organism growth (IMP) via [WBPaper00025090] Maduzia LL et al. (2005) | [GO:0040015] BIOLOGICAL_PROCESS negative regulation of multicellular organism growth (IGI) via [WBPaper00025090] Maduzia LL et al. (2005) | [GO:0040010] BIOLOGICAL_PROCESS positive regulation of growth rate (IMP) via [WBPaper00025090] Maduzia LL et al. (2005)…	WBGene00003055	178929_at	0.33823	0.0018	3.344	0.019681	5.642	0.180027	0.724796	3.70837	25.5821	cutl-18	F47G9.3	[GO:0016021] CELLULAR_COMPONENT integral to membrane (IEA)	WBGene00009830
187336_at	0.47712	0.007	4.6016	0.014135	20.662	0.435991	0.590352	2.17005	19795.1	Y110A7A.15	Y110A7A.15		WBGene00022462	178951_at	0.38856	0.0012	5.8394	0.0011507	23.474	0.336319	0.77114	5.10546	18036.6	C27A7.6	C27A7.6	[GO:0016021] CELLULAR_COMPONENT integral to membrane (IEA)	WBGene00007757
187348_at	0.59193	0.0005	4.9708	0.010709	17.421	0.472425	0.670663	2.62051	13766.3	C16C10.2	C16C10.2	[GO:0006364] BIOLOGICAL_PROCESS rRNA processing (IEA) | [GO:0032040] CELLULAR_COMPONENT small-subunit processome (IEA) | [GO:0040010] BIOLOGICAL_PROCESS positive regulation of growth rate (IMP) | [GO:0002119] BIOLOGICAL_PROCESS nematode larval development (IMP) | [GO:0040007] BIOLOGICAL_PROCESS growth (IMP)	WBGene00007623	178982_at	0.25537	0.0009	3.7114	0.01249	18.551	0.125006	0.61232	12.1739	1970.1	T05D4.2	T05D4.2		WBGene00011475
187361_s_at	0.47558	0.0026	4.2249	0.019006	7.708	0.498167	0.631854	3.54183	4952.99	prx-13	F32A5.6	[GO:0002119] BIOLOGICAL_PROCESS nematode larval development (IMP) via [WBPaper00005877] Thieringer H et al. (2003) | [GO:0005777] CELLULAR_COMPONENT peroxisome (IEA) | [GO:0016021] CELLULAR_COMPONENT integral to membrane (IEA) | [GO:0016560] BIOLOGICAL_PROCESS protein import into peroxisome matrix, docking (IEA) | [GO:0040007] BIOLOGICAL_PROCESS growth (IMP) | [GO:0040010] BIOLOGICAL_PROCESS posi…	WBGene00004198	178995_at	0.33439	0.001	5.5809	0.001505	10.705	0.373301	0.79543	2.89634	15.9403	C26E1.3	C26E1.3		WBGene00007749
187366_s_at	0.45654	0.0017	5.0949	0.0097803	18.022	0.504413	0.548072	4.38443	4493.04	rfp-1	R05D3.4	[GO:0005634] CELLULAR_COMPONENT nucleus (IDA) via [WBPaper00006398] Crowe E et al. (2004) | [GO:0005515] MOLECULAR_FUNCTION protein binding (IEA) | [GO:0008270] MOLECULAR_FUNCTION zinc ion binding (IEA) | [GO:0040010] BIOLOGICAL_PROCESS positive regulation of growth rate (IMP) | [GO:0002119] BIOLOGICAL_PROCESS nematode larval development (IMP) | [GO:0040007] BIOLOGICAL_PROCESS growth (IMP) | [GO:…	WBGene00007008	179043_at	0.26819	0.0105	3.3607	0.019273	20.906	0.308912	0.722713	3.71195	217.958	C09G9.5	C09G9.5	[GO:0016021] CELLULAR_COMPONENT integral to membrane (IEA)	WBGene00007495
187368_at	0.4964	0.0049	3.6123	0.031722	17.189	0.3967	0.597884	9.27591	1846.32	F54F2.9	F54F2.9	[GO:0003677] MOLECULAR_FUNCTION DNA binding (IEA) | [GO:0031072] MOLECULAR_FUNCTION heat shock protein binding (IEA) | [GO:0006457] BIOLOGICAL_PROCESS protein folding (IEA) | [GO:0051082] MOLECULAR_FUNCTION unfolded protein binding (IEA) | [GO:0016021] CELLULAR_COMPONENT integral to membrane (IEA)	WBGene00018836	179051_s_at	0.31145	0.0054	2.6586	0.047558	7.337	0.178273	0.946838	5.39903	3833.7	ZK228.3	ZK228.3		WBGene00013946
187430_at	0.36226	0.0054	4.2088	0.019254	9.254	0.370036	0.741664	2.28752	4055.59	K10D2.7	K10D2.7	[GO:0040010] BIOLOGICAL_PROCESS positive regulation of growth rate (IMP)	WBGene00019633	179060_at	0.3086	0.0035	2.7912	0.039963	12.8	0.180107	0.610179	2.11319	111.229	C33G3.6	C33G3.6		WBGene00007906
187446_s_at	0.59577	0.0018	6.5869	0.0036041	6.647	0.563522	0.73143	3.15116	5215.62	F15G9.1	F15G9.1		WBGene00008865	179062_s_at	0.34481	0.0021	3.4354	0.017556	12.19	0.218431	0.514787	3.15147	8313.54	F14D7.2	F14D7.2	[GO:0002009] BIOLOGICAL_PROCESS morphogenesis of an epithelium (IMP)	WBGene00008789
187477_s_at	0.45635	0.0086	3.4138	0.037778	20.099	0.367371	0.552698	2.94168	1215.79	F19F10.11	F19F10.11		WBGene00017607	179069_at	0.47374	0	6.1772	0.00081694	20.071	0.469645	0.868585	27.7872	3388.03	C08E8.4	C08E8.4	[GO:0008152] BIOLOGICAL_PROCESS metabolic process (IEA) | [GO:0016491] MOLECULAR_FUNCTION oxidoreductase activity (IEA)	WBGene00007440
187518_s_at	0.59446	0.0012	3.8706	0.025436	16.739	0.343188	0.756704	2.16739	31547.6	prx-19	F54F2.8	[GO:0002119] BIOLOGICAL_PROCESS nematode larval development (IMP) via [WBPaper00005877] Thieringer H et al. (2003) | [GO:0005777] CELLULAR_COMPONENT peroxisome (IEA) | [GO:0040007] BIOLOGICAL_PROCESS growth (IMP) | [GO:0040010] BIOLOGICAL_PROCESS positive regulation of growth rate (IMP) | [GO:0009792] BIOLOGICAL_PROCESS embryonic development ending in birth or egg hatching (IMP)	WBGene00004201	179118_at	0.29897	0.0055	3.0755	0.027664	11.687	0.0547043	0.661313	2.27054	32.3703	fbxa-82	C25D7.4		WBGene00007716
187525_s_at	0.45499	0.0143	8.5683	0.001179	20.574	0.663031	0.764235	1.80118	1.46533e+06	cpg-2	B0280.5	[GO:0005576] CELLULAR_COMPONENT extracellular region (IEA) | [GO:0006030] BIOLOGICAL_PROCESS chitin metabolic process (IEA) | [GO:0008061] MOLECULAR_FUNCTION chitin binding (IEA)	WBGene00015102	179131_at	0.23637	0.0074	3.3654	0.01916	1.767	0.293409	0.915943	4.95229	159.403	T08G5.3	T08G5.3		WBGene00011624
187580_s_at	0.34065	0.0057	3.7847	0.027351	6.765	0.305407	0.71595	2.88356	84193.7	K09G1.1	K09G1.1	[GO:0016020] CELLULAR_COMPONENT membrane (IEA) | [GO:0016021] CELLULAR_COMPONENT integral to membrane (IEA)	WBGene00010727	179139_at	0.35611	0.0008	3.2381	0.02249	19.139	0.233247	0.551584	2.2918	300.676	osm-7	T05D4.4	[GO:0040010] BIOLOGICAL_PROCESS positive regulation of growth rate (IMP) | [GO:0040011] BIOLOGICAL_PROCESS locomotion (IMP) | [GO:0000003] BIOLOGICAL_PROCESS reproduction (IMP) | [GO:0040035] BIOLOGICAL_PROCESS hermaphrodite genitalia development (IMP)	WBGene00003887
187592_s_at	0.48866	0.0017	5.2326	0.0088579	15.638	0.505509	0.709905	2.52236	1063.76	wrs-2	C34E10.4	[GO:0000166] MOLECULAR_FUNCTION nucleotide binding (IEA) | [GO:0004812] MOLECULAR_FUNCTION aminoacyl-tRNA ligase activity (IEA) | [GO:0005524] MOLECULAR_FUNCTION ATP binding (IEA) | [GO:0005737] CELLULAR_COMPONENT cytoplasm (IEA) | [GO:0006412] BIOLOGICAL_PROCESS translation (IEA) | [GO:0006418] BIOLOGICAL_PROCESS tRNA aminoacylation for protein translation (IEA) | [GO:0005515] MOLECULAR_FUNCTION…	WBGene00006946	179149_at	0.30316	0.0029	4.0657	0.0081572	17.209	0.259841	0.694711	3.31925	3675.96	F47B8.8	F47B8.8		WBGene00009809
187596_at	0.54074	0.002	4.1984	0.019416	17.816	0.495391	0.662743	1.56644	15691.2	T20B12.3	T20B12.3	[GO:0002119] BIOLOGICAL_PROCESS nematode larval development (IMP) | [GO:0040007] BIOLOGICAL_PROCESS growth (IMP) | [GO:0040010] BIOLOGICAL_PROCESS positive regulation of growth rate (IMP) | [GO:0000003] BIOLOGICAL_PROCESS reproduction (IMP) | [GO:0009792] BIOLOGICAL_PROCESS embryonic development ending in birth or egg hatching (IMP) | [GO:0040018] BIOLOGICAL_PROCESS positive regulation of multice…	WBGene00020601	179154_at	0.41225	0.0006	4.1733	0.0071842	18.432	0.301098	0.646822	1.90736	170.792	T28D6.7	T28D6.7		WBGene00012127
187646_s_at	0.4232	0.0138	3.8574	0.02572	9.871	0.409371	0.761416	2.86484	367737	C46C2.5	C46C2.5	[GO:0016021] CELLULAR_COMPONENT integral to membrane (IEA)	WBGene00008113	179167_at	0.30432	0.0055	2.7188	0.043936	9.271	0.120506	0.722638	4.05051	6174.24	M05D6.6	M05D6.6	[GO:0016021] CELLULAR_COMPONENT integral to membrane (IEA)	WBGene00010879
187657_s_at	0.48716	0.0088	4.0032	0.022772	17.262	0.392297	0.78702	13.6202	9964.99	ZK546.14	ZK546.14	[GO:0040010] BIOLOGICAL_PROCESS positive regulation of growth rate (IMP) | [GO:0002119] BIOLOGICAL_PROCESS nematode larval development (IMP) | [GO:0040007] BIOLOGICAL_PROCESS growth (IMP)	WBGene00022765	179176_at	0.3631	0.0019	3.3849	0.018698	21.744	0.145725	0.506905	4.30358	10239.4	C52G5.2	C52G5.2		WBGene00008260
187668_at	0.5764	0.0021	5.5619	0.0070319	6.585	0.467385	0.87604	5.30224	19590.6	F47D12.6	F47D12.6	[GO:0016021] CELLULAR_COMPONENT integral to membrane (IEA)	WBGene00018562	179210_at	0.42956	0	4.0744	0.0080731	6.638	0.359894	0.647569	5.74773	82.4945	T05F1.9	T05F1.9		WBGene00011494
187672_s_at	0.48391	0.0043	3.2326	0.04449	17.664	0.348319	0.598326	8.7736	1865.6	pes-10	Y46G5A.27		WBGene00003983	179240_at	0.46455	0.0002	4.938	0.0030061	2.779	0.372758	0.405872	9.18115	516.491	M03B6.1	M03B6.1		WBGene00010833
187715_at	0.31033	0.0169	3.1482	0.04808	18.278	0.326628	0.661338	1.68761	10888.1	ZK1098.2	ZK1098.2	[GO:0000003] BIOLOGICAL_PROCESS reproduction (IMP)	WBGene00014219	179245_at	0.42885	0.0006	5.8766	0.0011077	4.268	0.418469	0.714593	16.2337	1917.1	F57B1.6	F57B1.6	[GO:0016021] CELLULAR_COMPONENT integral to membrane (IEA)	WBGene00010189
187762_at	0.50803	0.0054	3.1372	0.04857	17.646	0.326651	0.462397	4.28359	304.649	C05D11.13	C05D11.13		WBGene00015488	179266_at	0.35265	0.0025	3.2554	0.022004	14.704	0.271611	0.561557	8.09983	1553.61	F15D4.5	F15D4.5		WBGene00008862
187773_at	0.5843	0.0012	6.6003	0.0035744	18.958	0.589358	0.70872	1.82226	21543.8	let-49	Y54E5B.3	[GO:0003713] MOLECULAR_FUNCTION transcription coactivator activity (IEA) | [GO:0005634] CELLULAR_COMPONENT nucleus (IEA) | [GO:0045941] BIOLOGICAL_PROCESS positive regulation of transcription (IEA) | [GO:0002009] BIOLOGICAL_PROCESS morphogenesis of an epithelium (IMP) | [GO:0009792] BIOLOGICAL_PROCESS embryonic development ending in birth or egg hatching (IMP) | [GO:0001703] BIOLOGICAL_PROCESS ga…	WBGene00002324	179276_s_at	0.36448	0.0005	3.1283	0.025858	5.91	0.131206	0.608467	9.71831	71.0217	F31E9.1	F31E9.1
187776_s_at	0.56305	0.0022	4.1293	0.020535	16.777	0.410779	0.700668	3.78651	9873.71	sir-2.4	C06A5.11	[GO:0003677] MOLECULAR_FUNCTION DNA binding (IEA) | [GO:0005677] CELLULAR_COMPONENT chromatin silencing complex (IEA) | [GO:0006342] BIOLOGICAL_PROCESS chromatin silencing (IEA) | [GO:0006355] BIOLOGICAL_PROCESS regulation of transcription, DNA-dependent (IEA) | [GO:0006476] BIOLOGICAL_PROCESS protein amino acid deacetylation (IEA) | [GO:0008270] MOLECULAR_FUNCTION zinc ion binding (IEA) | [GO:00…	WBGene00004803	179285_at	0.61669	0	9.1486	5.64e-05	21.503	0.606552	0.87629	6.42306	11628.9	ZK669.3	ZK669.3		WBGene00014053
187806_s_at	0.46496	0.0071	3.4175	0.037655	6.097	0.357939	0.422605	3.14462	92624.2	K07E3.4	K07E3.4	[GO:0004329] MOLECULAR_FUNCTION formate-tetrahydrofolate ligase activity (IEA) | [GO:0005524] MOLECULAR_FUNCTION ATP binding (IEA) | [GO:0009396] BIOLOGICAL_PROCESS folic acid and derivative biosynthetic process (IEA)	WBGene00019492	179296_at	0.5391	0	6.9132	0.00039906	22.471	0.555147	0.884059	26.7558	6220.47	C47A4.2	C47A4.2	[GO:0005337] MOLECULAR_FUNCTION nucleoside transmembrane transporter activity (IEA) | [GO:0006810] BIOLOGICAL_PROCESS transport (IEA) | [GO:0016020] CELLULAR_COMPONENT membrane (IEA) | [GO:0016021] CELLULAR_COMPONENT integral to membrane (IEA)	WBGene00008123
187829_s_at	0.41709	0.0137	3.572	0.032854	7.438	0.431797	0.575363	6.62133	1270.65	tag-234	F55C12.7			179302_at	0.32939	0.0047	3.352	0.019486	4.717	0.152781	0.693133	3.46743	116970	F22B8.7	F22B8.7		WBGene00009049
187830_s_at	0.35029	0.0095	3.6423	0.030905	4.018	0.358095	0.498305	6.63385	418.722	nab-1	C43E11.6	[GO:0048786] CELLULAR_COMPONENT presynaptic active zone (IDA) via [WBPaper00028874] Hung W et al. (2006) | [GO:0005886] CELLULAR_COMPONENT plasma membrane (IDA) via [WBPaper00028874] Hung W et al. (2006) | [GO:0044456] CELLULAR_COMPONENT synapse part (IDA) via [WBPaper00026667] Sieburth D et al. (2005) | [GO:0005515] MOLECULAR_FUNCTION protein binding (IEA)	WBGene00003516	179315_at	0.33538	0.0046	3.3542	0.019431	6.533	0.201355	0.410789	4.06568	10953.4	C50F4.4	C50F4.4		WBGene00008232
187932_at	0.40781	0.0121	3.4701	0.035935	20.956	0.388161	0.547396	1.69677	6116.68	scp-1	D2013.8	[GO:0016021] CELLULAR_COMPONENT integral to membrane (IEA) | [GO:0009792] BIOLOGICAL_PROCESS embryonic development ending in birth or egg hatching (IMP)	WBGene00004744	179318_at	0.23654	0.0043	2.91	0.034241	6.755	0.026936	0.39238	3.97675	5988.59	F31D4.8	F31D4.8		WBGene00009293
187955_at	0.39954	0.016	3.4706	0.035918	6.949	0.354895	0.699514	8.52533	1184.55	hot-6	C13G3.2	[GO:0016021] CELLULAR_COMPONENT integral to membrane (IEA)	WBGene00001991	179319_at	0.26972	0.0056	2.9778	0.031366	21.523	0.197041	0.326517	2.66539	33.5074	R07H5.9	R07H5.9		WBGene00011129
187982_at	0.41975	0.007	3.5162	0.034502	16.204	0.351322	0.487445	3.17221	19909.6	syp-1	F26D2.2	[GO:0000795] CELLULAR_COMPONENT synaptonemal complex (IDA) via [WBPaper00024612] Chan RC et al. (2004) | [GO:0009792] BIOLOGICAL_PROCESS embryonic development ending in birth or egg hatching (IMP) | [GO:0045132] BIOLOGICAL_PROCESS meiotic chromosome segregation (IMP)	WBGene00006375	179320_at	0.28235	0.0098	2.8431	0.037348	17.122	0.220389	0.82589	4.43971	2184.01	inft-2	F15B9.4	[GO:0003779] MOLECULAR_FUNCTION actin binding (IEA) | [GO:0016043] BIOLOGICAL_PROCESS cellular component organization and biogenesis (IEA) | [GO:0030036] BIOLOGICAL_PROCESS actin cytoskeleton organization and biogenesis (IEA)	WBGene00008848
188008_s_at	0.33299	0.0011	3.5704	0.032901	8.138	0.382642	0.406744	3.06296	12067.8	zig-7	F54D7.4		WBGene00006984	179349_at	0.36354	0.002	4.117	0.0076767	20.895	0.261411	0.52939	2.0804	60651	T04F8.8	T04F8.8	[GO:0016021] CELLULAR_COMPONENT integral to membrane (IEA)	WBGene00011446
188026_at	0.55131	0.0024	4.2339	0.018869	5.681	0.441617	0.566592	2.04664	390008	nex-1	ZC155.1	[GO:0005509] MOLECULAR_FUNCTION calcium ion binding (IEA) | [GO:0005544] MOLECULAR_FUNCTION calcium-dependent phospholipid binding (IEA) | [GO:0040010] BIOLOGICAL_PROCESS positive regulation of growth rate (IMP)	WBGene00003588	179373_at	0.25653	0.0124	3.388	0.018625	10.79	0.138856	0.302152	4.28697	3726.62	C50F4.9	C50F4.9		WBGene00008234
188032_at	0.47771	0.01	3.7258	0.02876	4.723	0.418208	0.491094	3.17813	58.5092	R07A4.2	R07A4.2	[GO:0016021] CELLULAR_COMPONENT integral to membrane (IEA)	WBGene00011073	179409_at	0.38744	0.0011	5.1161	0.0024729	9.193	0.30157	0.599204	3.36076	28121.1	T13H5.5	T13H5.5	[GO:0002119] BIOLOGICAL_PROCESS nematode larval development (IMP) | [GO:0040007] BIOLOGICAL_PROCESS growth (IMP) | [GO:0009792] BIOLOGICAL_PROCESS embryonic development ending in birth or egg hatching (IMP) | [GO:0040035] BIOLOGICAL_PROCESS hermaphrodite genitalia development (IMP)	WBGene00011759
188088_at	0.42486	0.0131	3.1486	0.048062	5.376	0.432583	0.715877	2.4718	479.634	ins-17	F56F3.6	[GO:0005179] MOLECULAR_FUNCTION hormone activity (IEA) | [GO:0005576] CELLULAR_COMPONENT extracellular region (IEA) | [GO:0016021] CELLULAR_COMPONENT integral to membrane (IEA) | [GO:0000003] BIOLOGICAL_PROCESS reproduction (IMP) | [GO:0040035] BIOLOGICAL_PROCESS hermaphrodite genitalia development (IMP) | [GO:0009792] BIOLOGICAL_PROCESS embryonic development ending in birth or egg hatching (IMP)…	WBGene00002100	179411_at	0.2455	0.0158	3.9148	0.0097655	9.732	0.409016	0.697835	4.29544	5472.25	F43G9.2	F43G9.2	[GO:0016998] BIOLOGICAL_PROCESS cell wall catabolic process (IEA) | [GO:0016021] CELLULAR_COMPONENT integral to membrane (IEA)	WBGene00009665
188132_at	0.4883	0.0057	3.3954	0.038405	5.871	0.340794	0.843869	3.62315	11194.9	col-76	M110.1	[GO:0042302] MOLECULAR_FUNCTION structural constituent of cuticle (IEA) | [GO:0016021] CELLULAR_COMPONENT integral to membrane (IEA)	WBGene00000652	179461_at	0.38342	0.0015	4.161	0.007289	18.773	0.273247	0.744922	3.82068	182.184	E01B7.1	E01B7.1	[GO:0004221] MOLECULAR_FUNCTION ubiquitin thiolesterase activity (IEA) | [GO:0006511] BIOLOGICAL_PROCESS ubiquitin-dependent protein catabolic process (IEA) | [GO:0040010] BIOLOGICAL_PROCESS positive regulation of growth rate (IMP) | [GO:0040018] BIOLOGICAL_PROCESS positive regulation of multicellular organism growth (IMP) | [GO:0040011] BIOLOGICAL_PROCESS locomotion (IMP) | [GO:0002119] BIOLOGIC…	WBGene00008441
188156_at	0.52556	0.0018	7.1786	0.0025259	7.501	0.59766	0.732608	4.91713	5299.67	C52A10.1	C52A10.1		WBGene00016862	179480_at	0.3695	0.001	4.1213	0.0076385	4.484	0.176293	0.697347	3.78836	149.423	fbxa-141	D1025.3	[GO:0000166] MOLECULAR_FUNCTION nucleotide binding (IEA) | [GO:0004812] MOLECULAR_FUNCTION aminoacyl-tRNA ligase activity (IEA) | [GO:0005524] MOLECULAR_FUNCTION ATP binding (IEA) | [GO:0005737] CELLULAR_COMPONENT cytoplasm (IEA) | [GO:0006412] BIOLOGICAL_PROCESS translation (IEA) | [GO:0006418] BIOLOGICAL_PROCESS tRNA aminoacylation for protein translation (IEA)	WBGene00008355
188169_at	0.51635	0.0046	8.8874	0.0010024	20.303	0.696331	0.815757	2.22224	279473	hmg-12	Y17G7A.1	[GO:0009792] BIOLOGICAL_PROCESS embryonic development ending in birth or egg hatching (IMP)	WBGene00001977	179489_s_at	0.32956	0.0018	3.4294	0.017686	16.116	0.190697	0.859038	3.00877	36256.9	R102.5	R102.5	[GO:0009792] BIOLOGICAL_PROCESS embryonic development ending in birth or egg hatching (IMP)	WBGene00011292
188211_at	0.28956	0.0135	3.1201	0.049344	19.877	0.316512	0.593426	3.10664	161.432	teg-1	Y47D3A.27		WBGene00006563	179492_at	0.45967	0.0002	5.3356	0.0019515	14.937	0.208562	0.861336	14.8414	432.767	F47B8.4	F47B8.4		WBGene00009805
188230_s_at	0.49474	0.0043	4.0439	0.02202	18.163	0.391183	0.699873	1.71198	50529.7	unc-61	Y50E8A.4	[GO:0032154] CELLULAR_COMPONENT cleavage furrow (IDA) via [WBPaper00004453] Nguyen TQ et al. (2000) | [GO:0030496] CELLULAR_COMPONENT midbody (IDA) via [WBPaper00004453] Nguyen TQ et al. (2000) | [GO:0040011] BIOLOGICAL_PROCESS locomotion (IMP) | [GO:0005525] MOLECULAR_FUNCTION GTP binding (IEA) | [GO:0007049] BIOLOGICAL_PROCESS cell cycle (IEA) | [GO:0005515] MOLECULAR_FUNCTION protein binding (…	WBGene00006795	179510_at	0.3052	0.003	3.3686	0.019083	2.219	0.201736	0.832576	229.132	1790.41	F58H1.2	F58H1.2	[GO:0016021] CELLULAR_COMPONENT integral to membrane (IEA)	WBGene00010285
188258_s_at	0.37699	0.0039	4.0593	0.021743	7.828	0.447529	0.519963	3.19138	96350.5	T10B5.7	T10B5.7		WBGene00020393	179513_at	0.32552	0.0009	3.6725	0.013099	16.664	0.205578	0.531407	3.49456	7723.97	ZK550.2	ZK550.2	[GO:0005215] MOLECULAR_FUNCTION transporter activity (IEA) | [GO:0006810] BIOLOGICAL_PROCESS transport (IEA) | [GO:0016021] CELLULAR_COMPONENT integral to membrane (IEA)	WBGene00013996
188264_at	0.45019	0.0068	3.3243	0.040936	20.452	0.305964	0.462001	1.88847	1111.75	figl-1	F32D1.1	[GO:0000166] MOLECULAR_FUNCTION nucleotide binding (IEA) | [GO:0017111] MOLECULAR_FUNCTION nucleoside-triphosphatase activity (IEA) | [GO:0005524] MOLECULAR_FUNCTION ATP binding (IEA)	WBGene00017981	179525_at	0.50836	0	6.1421	0.00084618	21.001	0.453829	0.741106	32.1108	5764.02	hrg-4	F36H1.5	[GO:0016021] CELLULAR_COMPONENT integral to membrane (IEA)	WBGene00009493
188274_at	0.64376	0.0009	7.2855	0.002374	17.217	0.611335	0.815401	1.91953	69341	taf-10	K03B4.3	[GO:0005634] CELLULAR_COMPONENT nucleus (IDA) via [WBPaper00006475] Walker AK et al. (2004) | [GO:0005634] CELLULAR_COMPONENT nucleus (IEA) | [GO:0003702] MOLECULAR_FUNCTION RNA polymerase II transcription factor activity (IEA) | [GO:0006352] BIOLOGICAL_PROCESS transcription initiation (IEA) | [GO:0009792] BIOLOGICAL_PROCESS embryonic development ending in birth or egg hatching (IMP) | [GO:001017…	WBGene00006392	179543_s_at	0.34731	0.0007	3.5555	0.015124	8.839	0.236626	0.663239	2.06733	36355.8	ZK265.9	ZK265.9	[GO:0016021] CELLULAR_COMPONENT integral to membrane (IEA)	WBGene00044094
188355_s_at	0.45872	0.0089	6.5475	0.0036931	19.595	0.609712	0.76897	1.88016	638297	F27C8.6	F27C8.6	[GO:0008152] BIOLOGICAL_PROCESS metabolic process (IEA) | [GO:0016787] MOLECULAR_FUNCTION hydrolase activity (IEA) | [GO:0016021] CELLULAR_COMPONENT integral to membrane (IEA) | [GO:0009792] BIOLOGICAL_PROCESS embryonic development ending in birth or egg hatching (IMP) | [GO:0018991] BIOLOGICAL_PROCESS oviposition (IMP)	WBGene00009186	179551_at	0.29832	0.0072	5.3369	0.0019487	12.762	0.397126	0.873266	8.88844	6213.38	F31D4.2	F31D4.2		WBGene00009290
188393_at	0.47966	0.0042	7.961	0.001626	6.76	0.638686	0.70753	3.77763	2956.75	flp-10	T06C10.4	[GO:0016021] CELLULAR_COMPONENT integral to membrane (IEA)	WBGene00001453	179553_at	0.50498	0	7.6053	0.00021063	23.555	0.599719	0.919241	6.75564	5121.09	F53F8.4	F53F8.4		WBGene00010001
188429_at	0.45634	0.0073	3.5978	0.032124	16.854	0.354022	0.66468	2.47382	5218.41	dom-3	F54C1.2		WBGene00001050	179557_at	0.33492	0.0029	3.6494	0.013475	7.851	0.228176	0.495393	6.61234	252.442	C26E1.2	C26E1.2		WBGene00007748
188438_s_at	0.49258	0.0038	5.3774	0.0079947	8.057	0.545664	0.669967	2.78721	10054.4	pfn-3	K03E6.6	[GO:0003779] MOLECULAR_FUNCTION actin binding (IEA) | [GO:0007010] BIOLOGICAL_PROCESS cytoskeleton organization and biogenesis (IEA) | [GO:0015629] CELLULAR_COMPONENT actin cytoskeleton (IEA) | [GO:0030036] BIOLOGICAL_PROCESS actin cytoskeleton organization and biogenesis (IEA)	WBGene00003991	179562_at	0.32782	0.0039	2.8081	0.039092	17.986	0.0997567	0.570582	2.22543	202.556	tag-333	C48G7.3	[GO:0005515] MOLECULAR_FUNCTION protein binding (IEA)	WBGene00008183
188459_s_at	0.49141	0.0003	5.4744	0.0074707	6.833	0.569211	0.741442	3.2267	175001	cpn-3	F28H1.2	[GO:0009792] BIOLOGICAL_PROCESS embryonic development ending in birth or egg hatching (IMP) | [GO:0002119] BIOLOGICAL_PROCESS nematode larval development (IMP) | [GO:0040007] BIOLOGICAL_PROCESS growth (IMP)	WBGene00000779	179570_at	0.31412	0.0017	2.7261	0.043517	0.82	0.171422	0.421039	3.58474	2682.08	F11E6.4	F11E6.4		WBGene00008708
188474_s_at	0.58202	0.0016	5.4182	0.0077693	7.784	0.551288	0.671339	2.13	17329	C14B9.2	C14B9.2	[GO:0016853] MOLECULAR_FUNCTION isomerase activity (IEA) | [GO:0005783] CELLULAR_COMPONENT endoplasmic reticulum (IEA) | [GO:0045454] BIOLOGICAL_PROCESS cell redox homeostasis (IEA) | [GO:0040010] BIOLOGICAL_PROCESS positive regulation of growth rate (IMP) | [GO:0009792] BIOLOGICAL_PROCESS embryonic development ending in birth or egg hatching (IMP) | [GO:0000003] BIOLOGICAL_PROCESS reproduction (…	WBGene00015752	179577_at	0.24698	0.0097	4.3534	0.0058228	12.059	0.273388	0.592246	21.7004	249.751	fbxb-57	F55C9.4		WBGene00010101
188483_s_at	0.48826	0.0033	5.2086	0.0090111	6.846	0.569017	0.767777	3.61004	186251	mlc-3	F09F7.2	[GO:0005509] MOLECULAR_FUNCTION calcium ion binding (IEA) | [GO:0018991] BIOLOGICAL_PROCESS oviposition (IMP) | [GO:0040011] BIOLOGICAL_PROCESS locomotion (IMP) | [GO:0040010] BIOLOGICAL_PROCESS positive regulation of growth rate (IMP)	WBGene00003371	179587_at	0.26033	0.0127	3.1038	0.026681	15.213	0.0200798	0.416764	10.9702	85.621	F44F4.3	F44F4.3	[GO:0016021] CELLULAR_COMPONENT integral to membrane (IEA)	WBGene00009702
188513_at	0.47293	0.0029	3.1516	0.047925	18.009	0.265333	0.517577	1.71184	3434.29	unc-119	M142.1	[GO:0040011] BIOLOGICAL_PROCESS locomotion (IMP) via [WBPaper00002306] Maduro MF et al. (1995) | [GO:0007635] BIOLOGICAL_PROCESS chemosensory behavior (IMP) via [WBPaper00002306] Maduro MF et al. (1995) | [GO:0007631] BIOLOGICAL_PROCESS feeding behavior (IMP) via [WBPaper00002306] Maduro MF et al. (1995) | [GO:0030517] BIOLOGICAL_PROCESS negative regulation of axon extension (IMP) via [WBPaper000…	WBGene00006843	179609_at	0.48532	0	9.3052	4.97e-05	7.398	0.563048	0.877484	5.40879	11728	ZK287.3	ZK287.3		WBGene00013964
188515_s_at	0.4064	0.0189	3.1428	0.048319	18.994	0.358997	0.501614	2.3641	3173.24	R151.7	R151.7	[GO:0006457] BIOLOGICAL_PROCESS protein folding (IEA) | [GO:0051082] MOLECULAR_FUNCTION unfolded protein binding (IEA) | [GO:0005524] MOLECULAR_FUNCTION ATP binding (IEA) | [GO:0040010] BIOLOGICAL_PROCESS positive regulation of growth rate (IMP)	WBGene00020110	179620_s_at	0.40571	0.0003	3.5905	0.014485	5.464	0.339663	0.617387	21.0005	7415.51	T10G3.3	T10G3.3		WBGene00011694
188540_at	0.34837	0.0105	4.9296	0.011039	20.603	0.520036	0.705303	2.19468	17026.8	fem-2	T19C3.8	[GO:0004722] MOLECULAR_FUNCTION protein serine/threonine phosphatase activity (IEA) | [GO:0006470] BIOLOGICAL_PROCESS protein amino acid dephosphorylation (IEA) | [GO:0008287] CELLULAR_COMPONENT protein serine/threonine phosphatase complex (IEA) | [GO:0003824] MOLECULAR_FUNCTION catalytic activity (IEA)	WBGene00001412	179635_at	0.23871	0.0173	2.9535	0.032367	1.15	0.0979904	0.628601	2.47332	36.3815	F07A5.4	F07A5.4		WBGene00008543
188607_at	0.65128	0.0002	11.0784	0.00036466	8.907	0.731729	0.803728	2.80052	25527	nit-1	ZK1058.6	[GO:0016810] MOLECULAR_FUNCTION hydrolase activity, acting on carbon-nitrogen (but not peptide) bonds (IEA) | [GO:0006807] BIOLOGICAL_PROCESS nitrogen compound metabolic process (IEA)	WBGene00014206	179642_at	0.39788	0.0006	4.2511	0.0065586	6.74	0.340461	0.796639	2.62184	38927.5	spp-16	F32D8.9		WBGene00005001
188627_at	0.55258	0.0016	5.7031	0.0063855	5.986	0.535526	0.900257	2.93153	3828.12	K07C11.4	K07C11.4	[GO:0040010] BIOLOGICAL_PROCESS positive regulation of growth rate (IMP)	WBGene00019477	179645_s_at	0.27585	0.0066	3.1085	0.026522	19.134	0.115719	0.642348	14.9259	2720.94	F56A8.8	F56A8.8		WBGene00010142
188639_at	0.42316	0.0048	3.5697	0.03292	18.695	0.40372	0.641687	2.52025	77.5909	set-5	C47E8.8	[GO:0005634] CELLULAR_COMPONENT nucleus (IEA)	WBGene00008145	179650_at	0.30261	0.0026	3.2065	0.02341	0.436	0.304043	0.492688	6.79335	5867.48	K08D8.4	K08D8.4		WBGene00010658
188651_s_at	0.49609	0.0021	4.8901	0.011367	17.287	0.478746	0.543481	3.49869	108198	hmg-4	T20B12.8	[GO:0000785] CELLULAR_COMPONENT chromatin (IEA) | [GO:0003677] MOLECULAR_FUNCTION DNA binding (IEA) | [GO:0005634] CELLULAR_COMPONENT nucleus (IEA) | [GO:0006355] BIOLOGICAL_PROCESS regulation of transcription, DNA-dependent (IEA) | [GO:0009792] BIOLOGICAL_PROCESS embryonic development ending in birth or egg hatching (IMP) | [GO:0040010] BIOLOGICAL_PROCESS positive regulation of growth rate (IMP)…	WBGene00001974	179652_at	0.51519	0	8.1128	0.00013446	15.25	0.570145	0.766964	8.85233	313.654	spat-1	F57C2.6		WBGene00010198
188684_s_at	0.54104	0.0006	4.5589	0.014607	18.326	0.426598	0.601958	2.60104	1375.12	rnp-7	K04G7.10	[GO:0003676] MOLECULAR_FUNCTION nucleic acid binding (IEA) | [GO:0000166] MOLECULAR_FUNCTION nucleotide binding (IEA) | [GO:0009792] BIOLOGICAL_PROCESS embryonic development ending in birth or egg hatching (IMP) | [GO:0000003] BIOLOGICAL_PROCESS reproduction (IMP) | [GO:0040035] BIOLOGICAL_PROCESS hermaphrodite genitalia development (IMP) | [GO:0002119] BIOLOGICAL_PROCESS nematode larval developm…	WBGene00004390	179656_at	0.42978	0.0002	4.1482	0.0073998	18.969	0.203105	0.576939	9.31836	86.7717	F11E6.6	F11E6.6	[GO:0016021] CELLULAR_COMPONENT integral to membrane (IEA) | [GO:0009792] BIOLOGICAL_PROCESS embryonic development ending in birth or egg hatching (IMP)	WBGene00008709
188699_s_at	0.37985	0.0166	5.7496	0.0061881	19.136	0.581043	0.666103	2.34128	6223.86	Y74C9A.4	Y74C9A.4	[GO:0003700] MOLECULAR_FUNCTION transcription factor activity (IEA) | [GO:0005634] CELLULAR_COMPONENT nucleus (IEA) | [GO:0006355] BIOLOGICAL_PROCESS regulation of transcription, DNA-dependent (IEA) | [GO:0008270] MOLECULAR_FUNCTION zinc ion binding (IEA) | [GO:0043565] MOLECULAR_FUNCTION sequence-specific DNA binding (IEA) | [GO:0003677] MOLECULAR_FUNCTION DNA binding (IEA)	WBGene00022278	179658_at	0.18636	0.0141	3.708	0.012543	4.28	0.248798	0.855154	3.57612	7141.69	zip-3	W07G1.3	[GO:0003700] MOLECULAR_FUNCTION transcription factor activity (IEA) | [GO:0005634] CELLULAR_COMPONENT nucleus (IEA) | [GO:0006355] BIOLOGICAL_PROCESS regulation of transcription, DNA-dependent (IEA) | [GO:0043565] MOLECULAR_FUNCTION sequence-specific DNA binding (IEA) | [GO:0046983] MOLECULAR_FUNCTION protein dimerization activity (IEA)	WBGene00012330
188715_at	0.47095	0.0071	4.5199	0.015055	17.132	0.48757	0.884952	4.07943	1400.67	rab-30	Y45F3A.2	[GO:0005525] MOLECULAR_FUNCTION GTP binding (IEA) | [GO:0007264] BIOLOGICAL_PROCESS small GTPase mediated signal transduction (IEA) | [GO:0003924] MOLECULAR_FUNCTION GTPase activity (IEA) | [GO:0005515] MOLECULAR_FUNCTION protein binding (IEA) | [GO:0006886] BIOLOGICAL_PROCESS intracellular protein transport (IEA) | [GO:0006913] BIOLOGICAL_PROCESS nucleocytoplasmic transport (IEA) | [GO:0007165] …	WBGene00004282	179667_at	0.28157	0.0009	3.508	0.01604	16.29	0.180933	0.906031	1.56736	9.53674	ZK666.1	ZK666.1		WBGene00014041
188748_s_at	0.52815	0.0039	3.6273	0.03131	21.269	0.304883	0.514122	2.20041	1328.39	H25P06.1	H25P06.1	[GO:0004396] MOLECULAR_FUNCTION hexokinase activity (IEA) | [GO:0005524] MOLECULAR_FUNCTION ATP binding (IEA) | [GO:0006096] BIOLOGICAL_PROCESS glycolysis (IEA) | [GO:0009792] BIOLOGICAL_PROCESS embryonic development ending in birth or egg hatching (IMP)	WBGene00010416	179682_at	0.63971	0	9.2189	5.33e-05	18.243	0.56643	0.823947	13.0129	20735.3	C31H5.6	C31H5.6	[GO:0006629] BIOLOGICAL_PROCESS lipid metabolic process (IEA) | [GO:0016290] MOLECULAR_FUNCTION palmitoyl-CoA hydrolase activity (IEA) | [GO:0006637] BIOLOGICAL_PROCESS acyl-CoA metabolic process (IEA) | [GO:0016790] MOLECULAR_FUNCTION thiolester hydrolase activity (IEA)	WBGene00007857
188775_s_at	0.74937	0.0002	11.1734	0.00035027	6.188	0.717916	0.813574	4.09955	5021.96	alp-1	T11B7.4	[GO:0043050] BIOLOGICAL_PROCESS pharyngeal pumping (IMP) via [WBPaper00001709] Avery L (1993) | [GO:0008340] BIOLOGICAL_PROCESS determination of adult life span (IMP) via [WBPaper00003257] Lakowski B et al. (1998) | [GO:0005515] MOLECULAR_FUNCTION protein binding (IEA) | [GO:0008270] MOLECULAR_FUNCTION zinc ion binding (IEA) | [GO:0040011] BIOLOGICAL_PROCESS locomotion (IMP)	WBGene00001132	179696_at	0.45615	0	7.6157	0.00020868	18.603	0.369246	0.587112	4.20919	662.76	Y51H1A.2	Y51H1A.2		WBGene00013093
188811_s_at	0.46957	0.0003	4.6087	0.014057	19.299	0.463284	0.674469	2.92479	1896.91	ing-3	Y51H1A.4	[GO:0005515] MOLECULAR_FUNCTION protein binding (IEA) | [GO:0008270] MOLECULAR_FUNCTION zinc ion binding (IEA)	WBGene00013095	179700_at	0.45626	0.0002	4.6934	0.0039491	12.884	0.324729	0.615085	6.52656	1023.13	cpg-4	C10F3.1		WBGene00015677
188878_s_at	0.56795	0.0017	4.1725	0.019827	5.872	0.455329	0.490414	3.42863	18779.6	apl-1	C42D8.8	[GO:0002119] BIOLOGICAL_PROCESS nematode larval development (IMP) via [WBPaper00029072] Hornsten A et al. (2007) | [GO:0042395] BIOLOGICAL_PROCESS ecdysis, collagen and cuticulin-based cuticle (IMP) via [WBPaper00029072] Hornsten A et al. (2007) | [GO:0010171] BIOLOGICAL_PROCESS body morphogenesis (IMP) via [WBPaper00029072] Hornsten A et al. (2007) | [GO:0009792] BIOLOGICAL_PROCESS embryonic dev…	WBGene00000149	179701_s_at	0.33643	0.0028	2.9493	0.03254	12.463	0.0876228	0.632518	2.67042	10864.3	cpg-4	C10F3.1		WBGene00015677
188889_at	0.62305	0.0006	6.7965	0.0031702	15.701	0.52308	0.922996	8.44065	2056.14	R08D7.5	R08D7.5	[GO:0005509] MOLECULAR_FUNCTION calcium ion binding (IEA)	WBGene00011145	179704_at	0.29814	0.0079	3.3159	0.020389	18.86	0.277059	0.805963	7.09374	3742.28	C16D9.4	C16D9.4	[GO:0016021] CELLULAR_COMPONENT integral to membrane (IEA)	WBGene00015859
188946_at	0.44958	0.0125	4.0486	0.021935	6.582	0.42503	0.629369	2.93792	2372.46	2010-06-01	T24H10.7	[GO:0003700] MOLECULAR_FUNCTION transcription factor activity (IEA) | [GO:0005634] CELLULAR_COMPONENT nucleus (IEA) | [GO:0006355] BIOLOGICAL_PROCESS regulation of transcription, DNA-dependent (IEA) | [GO:0043565] MOLECULAR_FUNCTION sequence-specific DNA binding (IEA) | [GO:0046983] MOLECULAR_FUNCTION protein dimerization activity (IEA) | [GO:0040010] BIOLOGICAL_PROCESS positive regulation of gro…	WBGene00012005	179727_at	0.40254	0.0002	4.3307	0.0059781	10.42	0.201557	0.361007	5.43138	19611.6	Y43C5A.3	Y43C5A.3	[GO:0016021] CELLULAR_COMPONENT integral to membrane (IEA)	WBGene00012783
188947_at	0.33714	0.0176	4.2231	0.019033	6.514	0.39255	0.889542	3.86352	8301.16	clec-47	T09F5.9	[GO:0005488] MOLECULAR_FUNCTION binding (IEA) | [GO:0016021] CELLULAR_COMPONENT integral to membrane (IEA)	WBGene00011668	179730_at	0.25918	0.015	4.4817	0.0050227	1.693	0.354641	0.560378	2.18633	508922	F19C7.1	F19C7.1	[GO:0040010] BIOLOGICAL_PROCESS positive regulation of growth rate (IMP)	WBGene00017591
188951_s_at	0.50397	0.0007	5.2405	0.008808	18.262	0.513545	0.52923	1.89593	18578.6	dnj-23	T24H10.3	[GO:0031072] MOLECULAR_FUNCTION heat shock protein binding (IEA) | [GO:0040011] BIOLOGICAL_PROCESS locomotion (IMP)	WBGene00001041	179733_s_at	0.40168	0.0012	3.8996	0.0099453	8.23	0.352008	0.551635	5.92327	577.696	K11G9.5	K11G9.5	[GO:0005215] MOLECULAR_FUNCTION transporter activity (IEA) | [GO:0006810] BIOLOGICAL_PROCESS transport (IEA) | [GO:0016021] CELLULAR_COMPONENT integral to membrane (IEA)	WBGene00019655
188984_s_at	0.61263	0.0001	12.1052	0.00023922	19.865	0.752412	0.880396	3.07269	1028.31	M03C11.2	M03C11.2	[GO:0004003] MOLECULAR_FUNCTION ATP-dependent DNA helicase activity (IEA) | [GO:0005634] CELLULAR_COMPONENT nucleus (IEA) | [GO:0016818] MOLECULAR_FUNCTION hydrolase activity, acting on acid anhydrides, in phosphorus-containing anhydrides (IEA) | [GO:0003676] MOLECULAR_FUNCTION nucleic acid binding (IEA) | [GO:0005524] MOLECULAR_FUNCTION ATP binding (IEA) | [GO:0006139] BIOLOGICAL_PROCESS nucleob…	WBGene00010839	179779_at	0.61663	0	8.9179	6.81e-05	14.999	0.465181	0.815862	8.09064	251.945	fbxa-162	C08E3.5		WBGene00015597
189003_s_at	0.55418	0.0018	4.3242	0.017555	6.098	0.466028	0.541485	3.74636	109118	K02D7.1	K02D7.1	[GO:0003824] MOLECULAR_FUNCTION catalytic activity (IEA) | [GO:0009116] BIOLOGICAL_PROCESS nucleoside metabolic process (IEA) | [GO:0016763] MOLECULAR_FUNCTION transferase activity, transferring pentosyl groups (IEA) | [GO:0004731] MOLECULAR_FUNCTION purine-nucleoside phosphorylase activity (IEA) | [GO:0006139] BIOLOGICAL_PROCESS nucleobase, nucleoside, nucleotide and nucleic acid metabolic proce…	WBGene00019298	179781_at	0.32393	0.0027	3.4435	0.01738	9.572	0.311037	0.540293	5.72	1864.99	C09E7.4	C09E7.4		WBGene00015638
189009_s_at	0.42687	0.0101	4.7238	0.012876	17.406	0.450148	0.743537	1.64646	38643.7	abcf-1	F18E2.2	[GO:0005524] MOLECULAR_FUNCTION ATP binding (IEA) | [GO:0016887] MOLECULAR_FUNCTION ATPase activity (IEA) | [GO:0000166] MOLECULAR_FUNCTION nucleotide binding (IEA) | [GO:0017111] MOLECULAR_FUNCTION nucleoside-triphosphatase activity (IEA) | [GO:0000003] BIOLOGICAL_PROCESS reproduction (IMP) | [GO:0040035] BIOLOGICAL_PROCESS hermaphrodite genitalia development (IMP) | [GO:0009792] BIOLOGICAL_PROC…	WBGene00006512	179782_s_at	0.54917	0	10.4844	2e-05	22.677	0.537978	0.794663	4.75675	1357.39	W01F3.1	W01F3.1		WBGene00012184
189023_at	0.41528	0.0026	4.4396	0.016027	6.983	0.454703	0.639034	4.19133	19857.5	W02B12.1	W02B12.1	[GO:0006629] BIOLOGICAL_PROCESS lipid metabolic process (IEA) | [GO:0016788] MOLECULAR_FUNCTION hydrolase activity, acting on ester bonds (IEA)	WBGene00012201	179786_at	0.50499	0	7.0959	0.00033606	20.04	0.523535	0.795804	25.7578	36564.7	C08E8.4	C08E8.4	[GO:0008152] BIOLOGICAL_PROCESS metabolic process (IEA) | [GO:0016491] MOLECULAR_FUNCTION oxidoreductase activity (IEA)	WBGene00007440
189026_s_at	0.50854	0.0074	3.9679	0.023449	5.608	0.442849	0.757663	2.35078	1309.43	F32A7.5	F32A7.5	[GO:0004553] MOLECULAR_FUNCTION hydrolase activity, hydrolyzing O-glycosyl compounds (IEA) | [GO:0005975] BIOLOGICAL_PROCESS carbohydrate metabolic process (IEA) | [GO:0009792] BIOLOGICAL_PROCESS embryonic development ending in birth or egg hatching (IMP)	WBGene00009306	179843_s_at	0.31953	0.0049	3.0354	0.029127	7.365	0.13924	0.598483	2.9376	18.7525	Y70C5A.3	Y70C5A.3		WBGene00050904
189028_s_at	0.4099	0.012	7.5341	0.0020597	19.045	0.661186	0.825055	2.83312	36512.7	srgp-1	F12F6.5	[GO:0005622] CELLULAR_COMPONENT intracellular (IEA) | [GO:0007165] BIOLOGICAL_PROCESS signal transduction (IEA)	WBGene00006406	179856_at	0.39531	0.0018	6.1013	0.00088165	23.663	0.465093	0.759809	14.8702	5231.45	F22E5.1	F22E5.1	[GO:0016021] CELLULAR_COMPONENT integral to membrane (IEA)	WBGene00017703
189041_s_at	0.49027	0.0001	4.7427	0.012693	8.251	0.494361	0.582998	2.4067	573.062	pgp-6	T21E8.1	[GO:0005524] MOLECULAR_FUNCTION ATP binding (IEA) | [GO:0006810] BIOLOGICAL_PROCESS transport (IEA) | [GO:0016021] CELLULAR_COMPONENT integral to membrane (IEA) | [GO:0042626] MOLECULAR_FUNCTION ATPase activity, coupled to transmembrane movement of substances (IEA) | [GO:0016887] MOLECULAR_FUNCTION ATPase activity (IEA) | [GO:0000166] MOLECULAR_FUNCTION nucleotide binding (IEA) | [GO:0017111] MOL…	WBGene00004000	179857_s_at	0.54806	0	7.713	0.00019125	23.611	0.550374	0.679195	20.2425	1655.91	F22E5.1	F22E5.1	[GO:0016021] CELLULAR_COMPONENT integral to membrane (IEA)	WBGene00017703
189086_s_at	0.56964	0.0014	4.5697	0.014485	5.675	0.46119	0.610626	4.47193	12494.8	atn-1	W04D2.1	[GO:0003779] MOLECULAR_FUNCTION actin binding (IEA) | [GO:0005509] MOLECULAR_FUNCTION calcium ion binding (IEA) | [GO:0009792] BIOLOGICAL_PROCESS embryonic development ending in birth or egg hatching (IMP) | [GO:0040010] BIOLOGICAL_PROCESS positive regulation of growth rate (IMP)	WBGene00000228	179858_at	0.27561	0.0111	2.7701	0.041081	0.449	0.287458	0.746805	2.95825	2459.54	C49C8.5	C49C8.5	[GO:0005102] MOLECULAR_FUNCTION receptor binding (IEA) | [GO:0007165] BIOLOGICAL_PROCESS signal transduction (IEA)	WBGene00016769
189087_s_at	0.58189	0.0016	5.257	0.008705	8.89	0.524887	0.578991	3.3512	17610.1	hsp-16.1	T27E4.8	[GO:0030968] BIOLOGICAL_PROCESS endoplasmic reticulum unfolded protein response (IEP) via [WBPaper00005432] Urano F et al. (2002) | [GO:0008340] BIOLOGICAL_PROCESS determination of adult life span (IMP)	WBGene00002015	179911_at	0.23503	0.0194	3.7207	0.012349	21.556	0.252904	0.53417	3.73166	103.519	fbxa-59	T12B5.8		WBGene00020455
189113_at	0.53687	0.0037	3.3296	0.040742	16.941	0.351237	0.61238	8.78915	1076.71	ZC376.4	ZC376.4	[GO:0003700] MOLECULAR_FUNCTION transcription factor activity (IEA) | [GO:0005634] CELLULAR_COMPONENT nucleus (IEA) | [GO:0006355] BIOLOGICAL_PROCESS regulation of transcription, DNA-dependent (IEA) | [GO:0043565] MOLECULAR_FUNCTION sequence-specific DNA binding (IEA) | [GO:0003677] MOLECULAR_FUNCTION DNA binding (IEA) | [GO:0045449] BIOLOGICAL_PROCESS regulation of transcription (IEA)	WBGene00013876	179912_at	0.35547	0.0015	4.5744	0.0045183	16.22	0.359411	0.587373	4.0503	239.177	T27A1.2	T27A1.2		WBGene00020834
189150_at	0.46143	0.0038	3.271	0.042961	7.241	0.392386	0.493323	5.17775	197.326	kgb-2	ZC416.4	[GO:0004672] MOLECULAR_FUNCTION protein kinase activity (IEA) | [GO:0005524] MOLECULAR_FUNCTION ATP binding (IEA) | [GO:0006468] BIOLOGICAL_PROCESS protein amino acid phosphorylation (IEA) | [GO:0004713] MOLECULAR_FUNCTION protein tyrosine kinase activity (IEA) | [GO:0004674] MOLECULAR_FUNCTION protein serine/threonine kinase activity (IEA) | [GO:0004707] MOLECULAR_FUNCTION MAP kinase activity (I…	WBGene00002188	179914_at	0.28302	0.0039	5.493	0.0016508	0.421	0.367401	0.489075	8.26431	9239.02	F35E12.8	F35E12.8		WBGene00009432
189170_at	0.51872	0.004	4.2477	0.01866	16.712	0.407561	0.663747	4.64622	6582.06	nth-1	R10E4.5	[GO:0006284] BIOLOGICAL_PROCESS base-excision repair (IEA) | [GO:0004519] MOLECULAR_FUNCTION endonuclease activity (IEA) | [GO:0006281] BIOLOGICAL_PROCESS DNA repair (IEA)	WBGene00011201	179922_s_at	0.4681	0.0002	6.4486	0.00062433	18.972	0.351723	0.823803	5.16855	105048	C18B2.4	C18B2.4		WBGene00015955
189178_at	0.43055	0.0029	3.8008	0.02698	7.956	0.345849	0.842935	2.09924	162197	F44G3.2	F44G3.2	[GO:0016301] MOLECULAR_FUNCTION kinase activity (IEA) | [GO:0016772] MOLECULAR_FUNCTION transferase activity, transferring phosphorus-containing groups (IEA) | [GO:0003824] MOLECULAR_FUNCTION catalytic activity (IEA)	WBGene00009706	179925_at	0.33087	0.0032	5.7314	0.0012865	9.726	0.578639	0.890764	3.00671	117.664	T14G11.1	T14G11.1	[GO:0016021] CELLULAR_COMPONENT integral to membrane (IEA)	WBGene00020510
189213_at	0.49417	0.0026	3.8509	0.025859	19.246	0.441256	0.731354	7.08666	79.5175	C56G2.5	C56G2.5		WBGene00016980	179933_at	0.28321	0.0065	2.8868	0.035285	19.736	0.114247	0.546214	2.33063	37.147	F39E9.1	F39E9.1		WBGene00018194
189267_s_at	0.3508	0.0056	3.3437	0.040227	5.526	0.359792	0.459293	3.84268	18746.5	F38B2.4	F38B2.4	[GO:0005524] MOLECULAR_FUNCTION ATP binding (IEA) | [GO:0006139] BIOLOGICAL_PROCESS nucleobase, nucleoside, nucleotide and nucleic acid metabolic process (IEA) | [GO:0019205] MOLECULAR_FUNCTION nucleobase, nucleoside, nucleotide kinase activity (IEA) | [GO:0004017] MOLECULAR_FUNCTION adenylate kinase activity (IEA) | [GO:0005737] CELLULAR_COMPONENT cytoplasm (IEA) | [GO:0046034] BIOLOGICAL_PROCES…	WBGene00009531	179942_at	0.68388	0	11.0308	1.34e-05	20.412	0.590063	0.772058	39.8509	991.781	M01G12.9	M01G12.9		WBGene00010822
189331_s_at	0.48191	0.0068	3.1546	0.047796	17.702	0.315154	0.487705	2.37808	39927.1	T26G10.1	T26G10.1	[GO:0003676] MOLECULAR_FUNCTION nucleic acid binding (IEA) | [GO:0005524] MOLECULAR_FUNCTION ATP binding (IEA) | [GO:0008026] MOLECULAR_FUNCTION ATP-dependent helicase activity (IEA) | [GO:0004386] MOLECULAR_FUNCTION helicase activity (IEA) | [GO:0002119] BIOLOGICAL_PROCESS nematode larval development (IMP) | [GO:0040007] BIOLOGICAL_PROCESS growth (IMP) | [GO:0000003] BIOLOGICAL_PROCESS reproduct…	WBGene00012059	179947_at	0.26236	0.0179	2.6902	0.045622	21.524	0.0746781	0.427546	2.28722	83757.1	T02C5.1	T02C5.1	[GO:0004872] MOLECULAR_FUNCTION receptor activity (IEA) | [GO:0016021] CELLULAR_COMPONENT integral to membrane (IEA)	WBGene00020158
189344_s_at	0.55089	0.0005	5.5478	0.0071007	8.291	0.510121	0.729137	3.33127	10641.8	cyp-14A5	F08F3.7	[GO:0004497] MOLECULAR_FUNCTION monooxygenase activity (IEA) | [GO:0005506] MOLECULAR_FUNCTION iron ion binding (IEA) | [GO:0009055] MOLECULAR_FUNCTION electron carrier activity (IEA) | [GO:0020037] MOLECULAR_FUNCTION heme binding (IEA) | [GO:0016021] CELLULAR_COMPONENT integral to membrane (IEA)	WBGene00000373	179949_at	0.28238	0.0066	2.7416	0.042645	5.026	0.0590167	0.618303	2.2973	40.6851	bre-2	Y39E4B.9	[GO:0006486] BIOLOGICAL_PROCESS protein amino acid glycosylation (IEA) | [GO:0008378] MOLECULAR_FUNCTION galactosyltransferase activity (IEA) | [GO:0016020] CELLULAR_COMPONENT membrane (IEA) | [GO:0016021] CELLULAR_COMPONENT integral to membrane (IEA)	WBGene00000267
189351_at	0.52843	0.0034	11.0168	0.00037436	20.586	0.732024	0.832887	2.34542	6616.19	mtm-6	F53A2.8	[GO:0006897] BIOLOGICAL_PROCESS endocytosis (IMP) via [WBPaper00004883] Fares H et al. (2001) | [GO:0016311] BIOLOGICAL_PROCESS dephosphorylation (IEA) | [GO:0016791] MOLECULAR_FUNCTION phosphatase activity (IEA) | [GO:0004725] MOLECULAR_FUNCTION protein tyrosine phosphatase activity (IEA) | [GO:0010171] BIOLOGICAL_PROCESS body morphogenesis (IMP)	WBGene00003478	179961_at	0.26784	0.0125	3.7837	0.011439	16.332	0.402737	0.659919	2.1285	4809.01	lin-8	B0454.1	[GO:0040027] BIOLOGICAL_PROCESS negative regulation of vulval development (IGI) via [WBPaper00000496] Horvitz HR et al. (1980)	WBGene00002997
189400_s_at	0.28908	0.0031	3.4446	0.036757	18.269	0.398298	0.619596	2.07998	33907.3	vrk-1	F28B12.3	[GO:0004672] MOLECULAR_FUNCTION protein kinase activity (IDA) via [WBPaper00028895] Gorjanacz M et al. (2006) | [GO:0004672] MOLECULAR_FUNCTION protein kinase activity (IEA) | [GO:0005524] MOLECULAR_FUNCTION ATP binding (IEA) | [GO:0006468] BIOLOGICAL_PROCESS protein amino acid phosphorylation (IEA) | [GO:0004674] MOLECULAR_FUNCTION protein serine/threonine kinase activity (IEA) | [GO:0009792] BI…	WBGene00017895	179978_at	0.60977	0	9.7688	3.45e-05	19.677	0.587641	0.912647	2.85336	4502.51	abce-1	Y39E4B.1	[GO:0005524] MOLECULAR_FUNCTION ATP binding (IEA) | [GO:0016887] MOLECULAR_FUNCTION ATPase activity (IEA) | [GO:0000166] MOLECULAR_FUNCTION nucleotide binding (IEA) | [GO:0017111] MOLECULAR_FUNCTION nucleoside-triphosphatase activity (IEA) | [GO:0009055] MOLECULAR_FUNCTION electron carrier activity (IEA) | [GO:0051536] MOLECULAR_FUNCTION iron-sulfur cluster binding (IEA) | [GO:0009792] BIOLOGICAL…	WBGene00012714
189413_at	0.43793	0.0038	3.3485	0.040054	7.263	0.304561	0.572318	3.25783	14721.4	cyp-43A1	E03E2.1	[GO:0004497] MOLECULAR_FUNCTION monooxygenase activity (IEA) | [GO:0005506] MOLECULAR_FUNCTION iron ion binding (IEA) | [GO:0009055] MOLECULAR_FUNCTION electron carrier activity (IEA) | [GO:0020037] MOLECULAR_FUNCTION heme binding (IEA)	WBGene00017108	179981_at	0.26964	0.0035	5.6679	0.0013741	14.858	0.38762	0.822522	6.09662	32.9822	K06A5.3	K06A5.3	[GO:0005198] MOLECULAR_FUNCTION structural molecule activity (IEA)	WBGene00019431
189495_at	0.56667	0.0006	8.5072	0.0012169	7.474	0.699674	0.815059	3.14356	1697.4	F26E4.3	F26E4.3	[GO:0004197] MOLECULAR_FUNCTION cysteine-type endopeptidase activity (IEA) | [GO:0006508] BIOLOGICAL_PROCESS proteolysis (IEA) | [GO:0008234] MOLECULAR_FUNCTION cysteine-type peptidase activity (IEA)	WBGene00009158	180010_at	0.41973	0.001	4.119	0.0076588	6.486	0.300288	0.921994	3.5495	14878.7	C44B7.7	C44B7.7	[GO:0016021] CELLULAR_COMPONENT integral to membrane (IEA)	WBGene00016629
189503_at	0.43973	0.0119	7.9335	0.0016505	5.385	0.61972	0.844178	2.24261	600.833	ckb-1	B0285.8	[GO:0040010] BIOLOGICAL_PROCESS positive regulation of growth rate (IMP)	WBGene00000511	180013_at	0.34204	0.0017	6.1657	0.00082638	3.951	0.484664	0.710676	7.66687	1021.81	fbxa-51	T12B5.1		WBGene00020448
189513_s_at	0.54304	0.001	3.9824	0.023167	15.689	0.426151	0.462019	3.23603	29568.4	T13H5.4	T13H5.4	[GO:0003676] MOLECULAR_FUNCTION nucleic acid binding (IEA) | [GO:0005634] CELLULAR_COMPONENT nucleus (IEA) | [GO:0008270] MOLECULAR_FUNCTION zinc ion binding (IEA) | [GO:0009792] BIOLOGICAL_PROCESS embryonic development ending in birth or egg hatching (IMP) | [GO:0000003] BIOLOGICAL_PROCESS reproduction (IMP) | [GO:0010171] BIOLOGICAL_PROCESS body morphogenesis (IMP) | [GO:0040035] BIOLOGICAL_PRO…	WBGene00011758	180014_s_at	0.39797	0.001	3.3482	0.019577	3.029	0.137255	0.854338	9.66541	3225.81	K07A1.13	K07A1.13	[GO:0016021] CELLULAR_COMPONENT integral to membrane (IEA)	WBGene00010617
189546_s_at	0.44714	0.0081	4.2896	0.018045	17.44	0.455459	0.685725	3.36433	7575.17	ceh-49	F17A9.6	[GO:0003700] MOLECULAR_FUNCTION transcription factor activity (IEA) | [GO:0005634] CELLULAR_COMPONENT nucleus (IEA) | [GO:0006355] BIOLOGICAL_PROCESS regulation of transcription, DNA-dependent (IEA) | [GO:0043565] MOLECULAR_FUNCTION sequence-specific DNA binding (IEA) | [GO:0003677] MOLECULAR_FUNCTION DNA binding (IEA) | [GO:0045449] BIOLOGICAL_PROCESS regulation of transcription (IEA)	WBGene00017538	180030_at	0.27408	0.004	3.9816	0.0090151	4.249	0.209367	0.920763	123.025	453.953	C10F3.7	C10F3.7		WBGene00015679
189555_at	0.32211	0.0035	3.5525	0.03342	20.015	0.343533	0.446559	2.18122	6302.85	C17E4.6	C17E4.6	[GO:0003677] MOLECULAR_FUNCTION DNA binding (IEA) | [GO:0003700] MOLECULAR_FUNCTION transcription factor activity (IEA) | [GO:0005634] CELLULAR_COMPONENT nucleus (IEA) | [GO:0045449] BIOLOGICAL_PROCESS regulation of transcription (IEA)	WBGene00007645	180079_at	0.29268	0.0031	3.7839	0.011437	19.844	0.20073	0.656899	3.09918	314.287	C50F2.7	C50F2.7	[GO:0016021] CELLULAR_COMPONENT integral to membrane (IEA)	WBGene00016840
189583_at	0.43999	0.0151	3.9505	0.023791	8.833	0.4055	0.574197	4.88101	50428.6	nex-3	C28A5.3	[GO:0005509] MOLECULAR_FUNCTION calcium ion binding (IEA) | [GO:0005544] MOLECULAR_FUNCTION calcium-dependent phospholipid binding (IEA) | [GO:0009792] BIOLOGICAL_PROCESS embryonic development ending in birth or egg hatching (IMP) | [GO:0048477] BIOLOGICAL_PROCESS oogenesis (IMP) | [GO:0018991] BIOLOGICAL_PROCESS oviposition (IMP)	WBGene00003590	180094_at	0.31279	0.0002	3.987	0.0089578	16.831	0.182015	0.494148	3.62539	15.2106	hil-8	T05E8.2
189591_s_at	0.53515	0.0028	6.0895	0.0049406	5.685	0.560412	0.66904	1.93741	57620.5	vha-15	T14F9.1	[GO:0000221] CELLULAR_COMPONENT vacuolar proton-transporting V-type ATPase, V1 domain (IEA) | [GO:0000300] CELLULAR_COMPONENT peripheral to membrane of membrane fraction (IEA) | [GO:0005524] MOLECULAR_FUNCTION ATP binding (IEA) | [GO:0046961] MOLECULAR_FUNCTION hydrogen ion transporting ATPase activity, rotational mechanism (IEA) | [GO:0001671] MOLECULAR_FUNCTION ATPase activator activity (IEA) |…	WBGene00020507	180107_at	0.17189	0.0169	3.1069	0.026577	12.242	0.142247	0.979974	1.8992	10.0455	srz-60	C04C3.1	[GO:0016021] CELLULAR_COMPONENT integral to membrane (IEA)	WBGene00015411
189627_at	0.46273	0.001	6.0124	0.0051958	6.819	0.582907	0.815262	2.90486	1231.55	Y59C2A.1	Y59C2A.1	[GO:0001584] MOLECULAR_FUNCTION rhodopsin-like receptor activity (IEA) | [GO:0007186] BIOLOGICAL_PROCESS G-protein coupled receptor protein signaling pathway (IEA) | [GO:0016021] CELLULAR_COMPONENT integral to membrane (IEA) | [GO:0004181] MOLECULAR_FUNCTION metallocarboxypeptidase activity (IEA) | [GO:0006508] BIOLOGICAL_PROCESS proteolysis (IEA) | [GO:0008270] MOLECULAR_FUNCTION zinc ion bindin…	WBGene00021984	180118_at	0.32899	0.0039	3.0864	0.027283	12.294	0.307095	0.634313	7.86472	725.657	fbxa-170	C36C9.3		WBGene00016486
189685_at	0.50153	0.0055	4.4663	0.015696	16.667	0.415193	0.8217	3.15113	91465.5	C35D10.6	C35D10.6	[GO:0016491] MOLECULAR_FUNCTION oxidoreductase activity (IEA) | [GO:0040011] BIOLOGICAL_PROCESS locomotion (IMP) | [GO:0040010] BIOLOGICAL_PROCESS positive regulation of growth rate (IMP)	WBGene00016443	180132_at	0.25796	0.0188	2.7922	0.03991	1.934	0.203056	0.689327	2.56069	429.873	ZK1073.2	ZK1073.2	[GO:0016021] CELLULAR_COMPONENT integral to membrane (IEA)	WBGene00014214
189706_s_at	0.37756	0.0037	3.2808	0.04258	6.173	0.400205	0.659233	2.15104	681928	F46H5.3	F46H5.3	[GO:0016301] MOLECULAR_FUNCTION kinase activity (IEA) | [GO:0016772] MOLECULAR_FUNCTION transferase activity, transferring phosphorus-containing groups (IEA) | [GO:0003824] MOLECULAR_FUNCTION catalytic activity (IEA)	WBGene00018519	180150_at	0.28647	0.0048	2.8596	0.036556	22.363	0.0852199	0.555415	2.04894	546660	F54E2.1	F54E2.1		WBGene00018823
189707_at	0.493	0.0031	4.3975	0.016567	21.039	0.477698	0.56483	1.92246	61519.2	tag-169	F44G4.4	[GO:0003676] MOLECULAR_FUNCTION nucleic acid binding (IEA) | [GO:0000166] MOLECULAR_FUNCTION nucleotide binding (IEA)	WBGene00006514	180151_s_at	0.27093	0.0104	3.6831	0.012929	11.789	0.302625	0.745456	4.22763	221.197	C09E7.8	C09E7.8	[GO:0005515] MOLECULAR_FUNCTION protein binding (IEA) | [GO:0008270] MOLECULAR_FUNCTION zinc ion binding (IEA)	WBGene00015642
189718_at	0.49031	0.0015	5.1534	0.0093755	7.884	0.486655	0.766198	3.29593	7043.39	tbb-6	T04H1.9	[GO:0005525] MOLECULAR_FUNCTION GTP binding (IEA) | [GO:0005874] CELLULAR_COMPONENT microtubule (IEA) | [GO:0007017] BIOLOGICAL_PROCESS microtubule-based process (IEA) | [GO:0005198] MOLECULAR_FUNCTION structural molecule activity (IEA) | [GO:0007018] BIOLOGICAL_PROCESS microtubule-based movement (IEA) | [GO:0043234] CELLULAR_COMPONENT protein complex (IEA) | [GO:0051258] BIOLOGICAL_PROCESS prote…	WBGene00006539	180192_at	0.42377	0.0005	4.0066	0.008751	10.513	0.182077	0.648146	26.1985	3015.31	C49G7.5	C49G7.5		WBGene00016783
189738_at	0.32654	0.0054	3.5292	0.034111	6.922	0.358605	0.612074	3.96807	21786.3	csq-1	F40E10.3	[GO:0005509] MOLECULAR_FUNCTION calcium ion binding (IEA)	WBGene00000822	180213_at	0.28599	0.0033	2.8589	0.036591	11.349	0.0551395	0.213828	3.28213	28.9194	fbxb-107	F29A7.2		WBGene00017912
189751_at	0.46453	0.0041	4.0263	0.022342	7.011	0.443089	0.61393	2.20521	27961	cnb-1	F55C10.1	[GO:0005509] MOLECULAR_FUNCTION calcium ion binding (IEA)	WBGene00000554	180240_at	0.43562	0.0003	4.4354	0.0052972	18.269	0.32133	0.554843	4.09776	5729.78	T23F4.2	T23F4.2		WBGene00020740
189761_s_at	0.34427	0.0033	3.4865	0.035418	5.661	0.383112	0.524835	2.86602	28387.9	F32B5.1	F32B5.1	[GO:0016301] MOLECULAR_FUNCTION kinase activity (IEA) | [GO:0016772] MOLECULAR_FUNCTION transferase activity, transferring phosphorus-containing groups (IEA) | [GO:0003824] MOLECULAR_FUNCTION catalytic activity (IEA)	WBGene00017975	180256_at	0.56949	0	11.0856	1.29e-05	6.267	0.600984	0.931271	76.7055	374.242	sdz-24	K07E8.3	[GO:0002119] BIOLOGICAL_PROCESS nematode larval development (IMP) | [GO:0018991] BIOLOGICAL_PROCESS oviposition (IMP) | [GO:0040007] BIOLOGICAL_PROCESS growth (IMP) | [GO:0040011] BIOLOGICAL_PROCESS locomotion (IMP) | [GO:0009792] BIOLOGICAL_PROCESS embryonic development ending in birth or egg hatching (IMP) | [GO:0010171] BIOLOGICAL_PROCESS body morphogenesis (IMP)	WBGene00019495
189802_s_at	0.46398	0.0095	3.367	0.039393	6.662	0.372885	0.401352	2.60434	2703.12	R11F4.1	R11F4.1	[GO:0005975] BIOLOGICAL_PROCESS carbohydrate metabolic process (IEA) | [GO:0004370] MOLECULAR_FUNCTION glycerol kinase activity (IEA) | [GO:0006072] BIOLOGICAL_PROCESS glycerol-3-phosphate metabolic process (IEA)	WBGene00020007	180286_at	0.35834	0.0006	5.0005	0.0028061	2.291	0.0867727	0.838458	1.82177	15.0769	W03D8.11	W03D8.11		WBGene00044796
189819_s_at	0.27397	0.0124	3.8706	0.025435	21.539	0.419015	0.664912	2.76269	32037.2	ZK829.9	ZK829.9	[GO:0005215] MOLECULAR_FUNCTION transporter activity (IEA) | [GO:0006810] BIOLOGICAL_PROCESS transport (IEA) | [GO:0016021] CELLULAR_COMPONENT integral to membrane (IEA)	WBGene00014097	180315_at	0.4923	0	7.83	0.00017234	22.987	0.427969	0.808257	103.796	3829.79	F44G3.10	F44G3.10	[GO:0016021] CELLULAR_COMPONENT integral to membrane (IEA)	WBGene00009710
189839_at	0.43925	0.0152	4.0695	0.021562	18.802	0.40663	0.801154	2.44397	187.344	C32A3.3	C32A3.3	[GO:0016021] CELLULAR_COMPONENT integral to membrane (IEA) | [GO:0040010] BIOLOGICAL_PROCESS positive regulation of growth rate (IMP)	WBGene00007860	180320_at	0.32095	0.0043	2.6831	0.046049	6.159	0.288695	0.553345	8.80362	263.099	F35A5.2	F35A5.2	[GO:0016021] CELLULAR_COMPONENT integral to membrane (IEA)	WBGene00018025
189853_s_at	0.35482	0.0036	6.0671	0.0050132	16.853	0.566535	0.80465	3.97022	5548.78	top-1	M01E5.5	[GO:0005634] CELLULAR_COMPONENT nucleus (IDA) via [WBPaper00004689] Lee MH et al. (2001) | [GO:0005730] CELLULAR_COMPONENT nucleolus (IDA) via [WBPaper00004689] Lee MH et al. (2001) | [GO:0031616] CELLULAR_COMPONENT spindle pole centrosome (IDA) via [WBPaper00004689] Lee MH et al. (2001) | [GO:0003917] MOLECULAR_FUNCTION DNA topoisomerase type I activity (IDA) via [WBPaper00002435] Kim JS et al. …	WBGene00006595	180360_at	0.49911	0.0001	5.5053	0.0016295	20.187	0.313966	0.888874	6.47399	50.784	C52E2.5	C52E2.5		WBGene00016884
189866_s_at	0.49005	0.0037	3.4618	0.036199	7.67	0.347272	0.56893	3.08157	2275.22	tag-224	B0496.8	[GO:0008270] MOLECULAR_FUNCTION zinc ion binding (IEA)	WBGene00015217	180363_at	0.40776	0.0002	4.6175	0.0043028	12.795	0.371426	0.682492	4.48086	37.489	W04C9.5	W04C9.5	[GO:0005525] MOLECULAR_FUNCTION GTP binding (IEA) | [GO:0007264] BIOLOGICAL_PROCESS small GTPase mediated signal transduction (IEA) | [GO:0005622] CELLULAR_COMPONENT intracellular (IEA) | [GO:0015031] BIOLOGICAL_PROCESS protein transport (IEA) | [GO:0002119] BIOLOGICAL_PROCESS nematode larval development (IMP)	WBGene00021027
189933_s_at	0.51079	0.0031	3.3657	0.039439	1.816	0.338071	0.466209	1.65978	4883.04	H17B01.1	H17B01.1	[GO:0016020] CELLULAR_COMPONENT membrane (IEA) | [GO:0022891] MOLECULAR_FUNCTION substrate-specific transmembrane transporter activity (IEA) | [GO:0055085] BIOLOGICAL_PROCESS transmembrane transport (IEA) | [GO:0005215] MOLECULAR_FUNCTION transporter activity (IEA) | [GO:0006810] BIOLOGICAL_PROCESS transport (IEA) | [GO:0016021] CELLULAR_COMPONENT integral to membrane (IEA)	WBGene00019207	180369_at	0.27893	0.0054	3.7226	0.012322	13.979	0.145881	0.45996	2.66711	15692.6	C17E7.4	C17E7.4	[GO:0009792] BIOLOGICAL_PROCESS embryonic development ending in birth or egg hatching (IMP)	WBGene00015899
189943_at	0.45431	0.0038	4.0018	0.022798	6.716	0.435984	0.592593	4.03129	92.6575	atf-2	K08F8.2	[GO:0003700] MOLECULAR_FUNCTION transcription factor activity (IEA) | [GO:0005634] CELLULAR_COMPONENT nucleus (IEA) | [GO:0006355] BIOLOGICAL_PROCESS regulation of transcription, DNA-dependent (IEA) | [GO:0043565] MOLECULAR_FUNCTION sequence-specific DNA binding (IEA) | [GO:0046983] MOLECULAR_FUNCTION protein dimerization activity (IEA)	WBGene00000220	180377_at	0.47214	0.0001	4.9024	0.0031269	6.896	0.429049	0.767825	3.42835	4147.13	inx-17	R12E2.4	[GO:0005921] CELLULAR_COMPONENT gap junction (IEA) | [GO:0016021] CELLULAR_COMPONENT integral to membrane (IEA)	WBGene00002139
189958_at	0.36147	0.0015	5.9108	0.0055556	9.707	0.637566	0.862884	1.94169	24.3336	F21A9.2	F21A9.2	[GO:0005622] CELLULAR_COMPONENT intracellular (IEA) | [GO:0008270] MOLECULAR_FUNCTION zinc ion binding (IEA)	WBGene00017651	180397_at	0.31855	0.0003	6.1264	0.00085965	17.554	0.325003	0.876958	3.54668	473.957	T20F7.1	T20F7.1	[GO:0005622] CELLULAR_COMPONENT intracellular (IEA) | [GO:0008270] MOLECULAR_FUNCTION zinc ion binding (IEA)	WBGene00020630
190014_at	0.58204	0.0011	5.1773	0.0092159	18.184	0.474473	0.794625	9.20136	390.957	B0432.13	B0432.13	[GO:0005515] MOLECULAR_FUNCTION protein binding (IEA) | [GO:0008270] MOLECULAR_FUNCTION zinc ion binding (IEA) | [GO:0040018] BIOLOGICAL_PROCESS positive regulation of multicellular organism growth (IMP)	WBGene00015194	180406_at	0.31771	0.0005	4.5972	0.0044027	3.237	0.273401	0.734515	4.45124	603.584	F59D6.7	F59D6.7	[GO:0005509] MOLECULAR_FUNCTION calcium ion binding (IEA) | [GO:0040011] BIOLOGICAL_PROCESS locomotion (IMP)	WBGene00019108
190072_at	0.45427	0.003	3.4499	0.036583	7.907	0.267464	0.522622	4.10999	600.753	mnm-2	C10A4.8	[GO:0005622] CELLULAR_COMPONENT intracellular (IEA) | [GO:0008270] MOLECULAR_FUNCTION zinc ion binding (IEA) | [GO:0003676] MOLECULAR_FUNCTION nucleic acid binding (IEA)	WBGene00003380	180407_at	0.29087	0.0077	3.7685	0.011652	19.374	0.417555	0.770668	2.75777	18996.3	F36D4.5	F36D4.5		WBGene00018090
190074_s_at	0.40614	0.0129	3.4814	0.035577	17.519	0.357332	0.588612	3.00394	1898.99	C01F1.1	C01F1.1	[GO:0003677] MOLECULAR_FUNCTION DNA binding (IEA) | [GO:0005634] CELLULAR_COMPONENT nucleus (IEA) | [GO:0016563] MOLECULAR_FUNCTION transcription activator activity (IEA) | [GO:0045941] BIOLOGICAL_PROCESS positive regulation of transcription (IEA) | [GO:0040010] BIOLOGICAL_PROCESS positive regulation of growth rate (IMP) | [GO:0009792] BIOLOGICAL_PROCESS embryonic development ending in birth or e…	WBGene00015296	180427_at	0.33319	0.0037	2.8224	0.038369	12.631	0.139357	0.541559	2.62424	18637.3	ZC395.5	ZC395.5		WBGene00022597
190103_at	0.29573	0.0154	3.6349	0.031104	20.977	0.372164	0.450602	1.90978	69474.8	C18A3.5	C18A3.5	[GO:0003676] MOLECULAR_FUNCTION nucleic acid binding (IEA) | [GO:0000166] MOLECULAR_FUNCTION nucleotide binding (IEA) | [GO:0002009] BIOLOGICAL_PROCESS morphogenesis of an epithelium (IMP) | [GO:0009792] BIOLOGICAL_PROCESS embryonic development ending in birth or egg hatching (IMP) | [GO:0002119] BIOLOGICAL_PROCESS nematode larval development (IMP) | [GO:0040007] BIOLOGICAL_PROCESS growth (IMP) |…	WBGene00015943	180437_at	0.3484	0.0017	3.2262	0.022832	16.118	0.029298	0.463805	3.01916	1436.44	F29C12.3	F29C12.3		WBGene00009245
190125_s_at	0.64169	0.0003	5.4841	0.0074205	16.959	0.528074	0.642367	6.54389	3111.1	C41D11.7	C41D11.7	[GO:0000166] MOLECULAR_FUNCTION nucleotide binding (IEA) | [GO:0017111] MOLECULAR_FUNCTION nucleoside-triphosphatase activity (IEA) | [GO:0000003] BIOLOGICAL_PROCESS reproduction (IMP)	WBGene00016566	180448_s_at	0.31998	0.0042	2.7543	0.041938	3.606	0.0151939	0.462569	9.6619	11126.1	T04C12.1	T04C12.1	[GO:0016021] CELLULAR_COMPONENT integral to membrane (IEA)	WBGene00011427
190149_at	0.58281	0.0002	7.5293	0.0020653	7.431	0.621759	0.754626	3.80313	13177.1	K02A11.3	K02A11.3		WBGene00010488	180450_at	0.24014	0.0105	2.9708	0.031651	23.877	0.376344	0.534505	2.10597	1.0057e+06	F52E1.14	F52E1.14		WBGene00044696
190170_s_at	0.60881	0	7.1041	0.0026387	7.06	0.611436	0.697951	2.16517	53384.3	W09D12.1	W09D12.1	[GO:0003824] MOLECULAR_FUNCTION catalytic activity (IEA) | [GO:0046872] MOLECULAR_FUNCTION metal ion binding (IEA) | [GO:0004222] MOLECULAR_FUNCTION metalloendopeptidase activity (IEA) | [GO:0005578] CELLULAR_COMPONENT proteinaceous extracellular matrix (IEA) | [GO:0006508] BIOLOGICAL_PROCESS proteolysis (IEA) | [GO:0008152] BIOLOGICAL_PROCESS metabolic process (IEA) | [GO:0008237] MOLECULAR_FUNC…	WBGene00012364	180453_at	0.30153	0.0063	2.7961	0.039712	10.084	0.214551	0.582497	3.20078	11685.7	F53A9.1	F53A9.1		WBGene00018724
190214_at	0.6053	0.0004	5.2909	0.0084978	17.711	0.483175	0.70089	6.07702	8257.74	C27A12.2	C27A12.2	[GO:0040010] BIOLOGICAL_PROCESS positive regulation of growth rate (IMP) | [GO:0009792] BIOLOGICAL_PROCESS embryonic development ending in birth or egg hatching (IMP) | [GO:0005622] CELLULAR_COMPONENT intracellular (IEA) | [GO:0008270] MOLECULAR_FUNCTION zinc ion binding (IEA) | [GO:0003676] MOLECULAR_FUNCTION nucleic acid binding (IEA)	WBGene00016154	180454_s_at	0.26386	0.0062	4.1088	0.0077515	7.966	0.25493	0.93083	7.25567	38.5362	K03A11.5	K03A11.5	[GO:0016021] CELLULAR_COMPONENT integral to membrane (IEA)	WBGene00010522
190217_at	0.49458	0.0041	5.014	0.010375	4.587	0.499087	0.656495	2.89186	135.198	nhr-180	F31F4.12	[GO:0003700] MOLECULAR_FUNCTION transcription factor activity (IEA) | [GO:0003707] MOLECULAR_FUNCTION steroid hormone receptor activity (IEA) | [GO:0005634] CELLULAR_COMPONENT nucleus (IEA) | [GO:0006355] BIOLOGICAL_PROCESS regulation of transcription, DNA-dependent (IEA) | [GO:0008270] MOLECULAR_FUNCTION zinc ion binding (IEA) | [GO:0043565] MOLECULAR_FUNCTION sequence-specific DNA binding (IEA)	WBGene00017961	180455_s_at	0.29168	0.005	3.0288	0.029373	10.625	0.36519	0.737382	3.70495	1092.67	Y39G8B.2	Y39G8B.2	[GO:0016491] MOLECULAR_FUNCTION oxidoreductase activity (IEA)	WBGene00012723
190242_at	0.46765	0.0028	4.7493	0.012631	6.549	0.480798	0.497713	2.44012	86501.9	asb-2	F02E8.1	[GO:0015986] BIOLOGICAL_PROCESS ATP synthesis coupled proton transport (IEA) | [GO:0016469] CELLULAR_COMPONENT proton-transporting two-sector ATPase complex (IEA) | [GO:0046933] MOLECULAR_FUNCTION hydrogen ion transporting ATP synthase activity, rotational mechanism (IEA) | [GO:0046961] MOLECULAR_FUNCTION hydrogen ion transporting ATPase activity, rotational mechanism (IEA) | [GO:0002119] BIOLOGI…	WBGene00000207	180461_at	0.30231	0.0009	3.2961	0.020904	0.588	0.13831	0.487112	2.26904	617.618	cgt-2	F20B4.6	[GO:0016021] CELLULAR_COMPONENT integral to membrane (IEA)	WBGene00017625
190265_at	0.3623	0.0066	6.9916	0.0028201	6.793	0.597831	0.619904	4.90007	1977.14	C55A6.7	C55A6.7	[GO:0008152] BIOLOGICAL_PROCESS metabolic process (IEA) | [GO:0016491] MOLECULAR_FUNCTION oxidoreductase activity (IEA) | [GO:0003824] MOLECULAR_FUNCTION catalytic activity (IEA) | [GO:0005488] MOLECULAR_FUNCTION binding (IEA) | [GO:0006952] BIOLOGICAL_PROCESS defense response (IMP)	WBGene00008336	180470_at	0.20236	0.0118	2.876	0.035785	8.222	0.190667	0.643908	3.33467	105190	F22F7.1	F22F7.1	[GO:0003824] MOLECULAR_FUNCTION catalytic activity (IEA) | [GO:0005488] MOLECULAR_FUNCTION binding (IEA) | [GO:0008152] BIOLOGICAL_PROCESS metabolic process (IEA) | [GO:0016021] CELLULAR_COMPONENT integral to membrane (IEA)	WBGene00017719
190285_at	0.53765	0.0027	3.3531	0.039889	6.976	0.375397	0.568653	2.32799	134.515	ZK54.1	ZK54.1	[GO:0005215] MOLECULAR_FUNCTION transporter activity (IEA) | [GO:0006810] BIOLOGICAL_PROCESS transport (IEA) | [GO:0016021] CELLULAR_COMPONENT integral to membrane (IEA)	WBGene00022647	180471_at	0.42154	0.001	5.3777	0.0018657	4.588	0.463169	0.787479	3.67006	15828.5	Y17G7B.8	Y17G7B.8		WBGene00012462
190286_at	0.34195	0.0034	4.3604	0.017059	6.921	0.449717	0.475112	6.85115	788.084	C55A6.6	C55A6.6	[GO:0008152] BIOLOGICAL_PROCESS metabolic process (IEA) | [GO:0016491] MOLECULAR_FUNCTION oxidoreductase activity (IEA) | [GO:0003824] MOLECULAR_FUNCTION catalytic activity (IEA) | [GO:0005488] MOLECULAR_FUNCTION binding (IEA)	WBGene00008335	180483_at	0.31274	0.0009	3.7709	0.011618	2.497	0.206341	0.6098	5.09267	71.6664	W02D7.8	W02D7.8	[GO:0016021] CELLULAR_COMPONENT integral to membrane (IEA)	WBGene00020943
190319_at	0.56086	0.001	3.3555	0.039804	17.441	0.417484	0.618372	3.6694	1650.41	T22C8.4	T22C8.4	[GO:0005622] CELLULAR_COMPONENT intracellular (IEA) | [GO:0008270] MOLECULAR_FUNCTION zinc ion binding (IEA) | [GO:0016021] CELLULAR_COMPONENT integral to membrane (IEA)	WBGene00011925	180499_at	0.22171	0.0198	3.7995	0.011222	12.018	0.110704	0.508589	1.9245	69.427	T04D1.2	T04D1.2		WBGene00020212
190330_s_at	0.4511	0.0026	4.4526	0.015865	7.011	0.410998	0.542403	3.08373	599.396	F25E2.3	F25E2.3	[GO:0006637] BIOLOGICAL_PROCESS acyl-CoA metabolic process (IEA) | [GO:0016291] MOLECULAR_FUNCTION acyl-CoA thioesterase activity (IEA)	WBGene00017781	180521_at	0.33916	0.0002	5.3055	0.0020154	20.577	0.297529	0.878104	6.79229	118.502	T20D4.6	T20D4.6	[GO:0007165] BIOLOGICAL_PROCESS signal transduction (IEA) | [GO:0007600] BIOLOGICAL_PROCESS sensory perception (IEA)	WBGene00020612
190341_at	0.4767	0.0054	4.7471	0.012652	18.94	0.445419	0.705623	1.96468	92619.9	spr-2	C27B7.1	[GO:0046662] BIOLOGICAL_PROCESS regulation of oviposition (IGI) via [WBPaper00004474] Wen C-h et al. (2000) | [GO:0005634] CELLULAR_COMPONENT nucleus (IDA) via [WBPaper00004474] Wen C-h et al. (2000) | [GO:0005634] CELLULAR_COMPONENT nucleus (IEA) | [GO:0006334] BIOLOGICAL_PROCESS nucleosome assembly (IEA)	WBGene00005007	180532_s_at	0.3845	0.0008	3.8657	0.01036	20.952	0.292484	0.551852	2.64884	66.2373	hex-5	Y70D2A.2	[GO:0003824] MOLECULAR_FUNCTION catalytic activity (IEA) | [GO:0005975] BIOLOGICAL_PROCESS carbohydrate metabolic process (IEA) | [GO:0043169] MOLECULAR_FUNCTION cation binding (IEA)	WBGene00013497
190350_at	0.41242	0.0128	3.3535	0.039875	17.191	0.293349	0.675933	2.93039	13014	ZK632.2	ZK632.2	[GO:0003725] MOLECULAR_FUNCTION double-stranded RNA binding (IEA) | [GO:0005622] CELLULAR_COMPONENT intracellular (IEA) | [GO:0040035] BIOLOGICAL_PROCESS hermaphrodite genitalia development (IMP) | [GO:0002009] BIOLOGICAL_PROCESS morphogenesis of an epithelium (IMP) | [GO:0040011] BIOLOGICAL_PROCESS locomotion (IMP) | [GO:0000003] BIOLOGICAL_PROCESS reproduction (IMP)	WBGene00014011	180541_s_at	0.80777	0	23.2651	1.76e-08	8.559	0.78893	0.906885	11.3028	86494.6	C24G6.6	C24G6.6	[GO:0009055] MOLECULAR_FUNCTION electron carrier activity (IEA) | [GO:0016491] MOLECULAR_FUNCTION oxidoreductase activity (IEA) | [GO:0003824] MOLECULAR_FUNCTION catalytic activity (IEA) | [GO:0005488] MOLECULAR_FUNCTION binding (IEA) | [GO:0008152] BIOLOGICAL_PROCESS metabolic process (IEA)	WBGene00016061
190353_s_at	0.58948	0	10.4202	0.00048564	6.09	0.720155	0.950377	3.36079	16301.7	emb-9	K04H4.1	[GO:0030198] BIOLOGICAL_PROCESS extracellular matrix organization and biogenesis (IMP) via [WBPaper00002814] Gupta MC et al. (1997) Journal of Cell Biology "Characterization of alpha-1(IV) | [GO:0009790] BIOLOGICAL_PROCESS embryonic development (IMP) via [WBPaper00002814] Gupta MC et al. (1997) Journal of Cell Biology "Characterization of alpha-1(IV) | [GO:0002119] BIOLOGICAL_PROCESS nematode lar…	WBGene00001263	180544_s_at	0.59769	0.0001	9.6345	3.83e-05	8.527	0.597109	0.839366	7.29317	332.276	F42G2.4	F42G2.4
190392_s_at	0.49006	0.0047	3.5395	0.033803	4.503	0.369136	0.518388	1.76598	26327.4	cas-1	F41G4.2	[GO:0003779] MOLECULAR_FUNCTION actin binding (IEA) | [GO:0007010] BIOLOGICAL_PROCESS cytoskeleton organization and biogenesis (IEA) | [GO:0005488] MOLECULAR_FUNCTION binding (IEA)	WBGene00000294	180547_at	0.24091	0.0162	2.6248	0.049729	18.274	0.231865	0.651811	3.60409	3729.49	dhhc-1	F09B12.2	[GO:0008270] MOLECULAR_FUNCTION zinc ion binding (IEA) | [GO:0016021] CELLULAR_COMPONENT integral to membrane (IEA)	WBGene00008606
190429_at	0.37097	0.0125	3.2461	0.043946	7.57	0.250302	0.737798	2.73611	299792	R09H10.3	R09H10.3	[GO:0005496] MOLECULAR_FUNCTION steroid binding (IEA) | [GO:0006810] BIOLOGICAL_PROCESS transport (IEA)	WBGene00011181	180553_s_at	0.38938	0.0011	3.785	0.011421	10.132	0.297389	0.667022	2.62245	52.293	Y48A6C.1	Y48A6C.1	[GO:0005622] CELLULAR_COMPONENT intracellular (IEA) | [GO:0008270] MOLECULAR_FUNCTION zinc ion binding (IEA) | [GO:0040010] BIOLOGICAL_PROCESS positive regulation of growth rate (IMP) | [GO:0002119] BIOLOGICAL_PROCESS nematode larval development (IMP) | [GO:0040007] BIOLOGICAL_PROCESS growth (IMP)	WBGene00012974
190436_at	0.45744	0.0034	4.1646	0.019954	6.477	0.491971	0.841821	3.33682	61928.6	unc-15	F07A5.7	[GO:0040011] BIOLOGICAL_PROCESS locomotion (IMP) via [WBPaper00027703] Mercer KB et al. (2006) | [GO:0040011] BIOLOGICAL_PROCESS locomotion (IGI) via [WBPaper00027703] Mercer KB et al. (2006) | [GO:0030241] BIOLOGICAL_PROCESS muscle thick filament assembly (IMP) via [WBPaper00027703] Mercer KB et al. (2006) | [GO:0030241] BIOLOGICAL_PROCESS muscle thick filament assembly (IGI) via [WBPaper0002770…	WBGene00006754	180576_at	0.38713	0.001	4.2872	0.0062885	19.151	0.303547	0.652896	3.60683	1131.96	mat-3	F10C5.1	[GO:0005488] MOLECULAR_FUNCTION binding (IEA) | [GO:0000003] BIOLOGICAL_PROCESS reproduction (IMP) | [GO:0007126] BIOLOGICAL_PROCESS meiosis (IMP) | [GO:0009792] BIOLOGICAL_PROCESS embryonic development ending in birth or egg hatching (IMP) | [GO:0010171] BIOLOGICAL_PROCESS body morphogenesis (IMP) | [GO:0040035] BIOLOGICAL_PROCESS hermaphrodite genitalia development (IMP) | [GO:0002119] BIOLOGIC…	WBGene00003134
190546_s_at	0.46614	0.0013	4.7534	0.012592	6.862	0.523707	0.700535	2.99677	411607	T25F10.6	T25F10.6		WBGene00020808	180607_at	0.38964	0.0012	4.8271	0.0033998	17.198	0.287263	0.689647	5.03784	2851.01	C10G6.1	C10G6.1	[GO:0003676] MOLECULAR_FUNCTION nucleic acid binding (IEA) | [GO:0005622] CELLULAR_COMPONENT intracellular (IEA) | [GO:0006139] BIOLOGICAL_PROCESS nucleobase, nucleoside, nucleotide and nucleic acid metabolic process (IEA) | [GO:0008408] MOLECULAR_FUNCTION 3'-5' exonuclease activity (IEA) | [GO:0002009] BIOLOGICAL_PROCESS morphogenesis of an epithelium (IMP) | [GO:0040011] BIOLOGICAL_PROCESS loco…	WBGene00015680
190566_at	0.61189	0.0017	6.1209	0.0048408	7.038	0.573149	0.767509	4.00548	50198.5	T12G3.1	T12G3.1	[GO:0008270] MOLECULAR_FUNCTION zinc ion binding (IEA)	WBGene00011737	180615_at	0.31763	0.0038	3.204	0.023484	3.538	0.191442	0.435341	3.78598	1197.43	F49C12.6	F49C12.6	[GO:0016021] CELLULAR_COMPONENT integral to membrane (IEA)	WBGene00009876
190576_s_at	0.50055	0.0038	4.3225	0.01758	17.127	0.411471	0.704796	4.65461	16152.4	K07C5.6	K07C5.6	[GO:0003676] MOLECULAR_FUNCTION nucleic acid binding (IEA) | [GO:0008270] MOLECULAR_FUNCTION zinc ion binding (IEA) | [GO:0009792] BIOLOGICAL_PROCESS embryonic development ending in birth or egg hatching (IMP) | [GO:0008340] BIOLOGICAL_PROCESS determination of adult life span (IMP) | [GO:0018996] BIOLOGICAL_PROCESS molting cycle, collagen and cuticulin-based cuticle (IMP) | [GO:0002119] BIOLOGICA…	WBGene00010629	180616_at	0.37363	0.0003	3.6409	0.013616	10.395	0.280186	0.730458	21.9703	330.222	T22B7.3	T22B7.3	[GO:0005737] CELLULAR_COMPONENT cytoplasm (IEA) | [GO:0016813] MOLECULAR_FUNCTION hydrolase activity, acting on carbon-nitrogen (but not peptide) bonds, in linear amidines (IEA)	WBGene00020672
190655_at	0.31756	0.0043	3.8956	0.024907	20.417	0.434882	0.579172	1.98348	41383.3	rnp-1	ZK863.7	[GO:0003676] MOLECULAR_FUNCTION nucleic acid binding (IEA) | [GO:0000166] MOLECULAR_FUNCTION nucleotide binding (IEA) | [GO:0000003] BIOLOGICAL_PROCESS reproduction (IMP)	WBGene00004384	180627_at	0.33554	0.003	4.6288	0.0042481	8.098	0.425462	0.639382	5.55057	2789.68	K04F1.9	K04F1.9		WBGene00019388
190700_s_at	0.55633	0.0004	4.8277	0.011908	17.217	0.43115	0.701497	5.27137	22658.9	R186.7	R186.7		WBGene00011308	180633_at	0.39921	0.0004	4.4142	0.0054279	1.643	0.255811	0.814395	16.6064	234.768	C53B7.7	C53B7.7	[GO:0004222] MOLECULAR_FUNCTION metalloendopeptidase activity (IEA) | [GO:0006508] BIOLOGICAL_PROCESS proteolysis (IEA) | [GO:0016020] CELLULAR_COMPONENT membrane (IEA)	WBGene00016896
190725_at	0.37245	0.0105	5.805	0.0059615	17.958	0.541942	0.769336	2.80896	250.342	set-12	K09F5.5	[GO:0005634] CELLULAR_COMPONENT nucleus (IEA) | [GO:0018024] MOLECULAR_FUNCTION histone-lysine N-methyltransferase activity (IEA)	WBGene00019584	180665_at	0.3403	0.002	3.6221	0.013933	17.405	0.248469	0.769163	7.23645	188.319	D2021.4	D2021.4	[GO:0006637] BIOLOGICAL_PROCESS acyl-CoA metabolic process (IEA) | [GO:0016291] MOLECULAR_FUNCTION acyl-CoA thioesterase activity (IEA)	WBGene00017048
190743_at	0.54142	0.0047	3.1942	0.046086	18.666	0.256637	0.740523	2.64834	404.018	C02F5.12	C02F5.12	[GO:0005622] CELLULAR_COMPONENT intracellular (IEA) | [GO:0008270] MOLECULAR_FUNCTION zinc ion binding (IEA) | [GO:0009792] BIOLOGICAL_PROCESS embryonic development ending in birth or egg hatching (IMP)	WBGene00015352	180669_s_at	0.4262	0.0001	6.0005	0.00097617	4.888	0.561694	0.871584	3.08534	191168	Y4C6B.6	Y4C6B.6	[GO:0004348] MOLECULAR_FUNCTION glucosylceramidase activity (IEA) | [GO:0005764] CELLULAR_COMPONENT lysosome (IEA) | [GO:0006665] BIOLOGICAL_PROCESS sphingolipid metabolic process (IEA) | [GO:0007040] BIOLOGICAL_PROCESS lysosome organization and biogenesis (IEA) | [GO:0003824] MOLECULAR_FUNCTION catalytic activity (IEA) | [GO:0005975] BIOLOGICAL_PROCESS carbohydrate metabolic process (IEA) | [GO:…	WBGene00021160
190768_s_at	0.5674	0.0001	7.9524	0.0016336	19.192	0.647547	0.778028	1.55444	23112.9	ttll-4	ZK1128.6	[GO:0004835] MOLECULAR_FUNCTION tubulin-tyrosine ligase activity (IEA) | [GO:0006464] BIOLOGICAL_PROCESS protein modification process (IEA)	WBGene00014232	180704_at	0.50718	0	12.2943	5.56e-06	6.102	0.615161	0.740786	47.5934	1178.59	F56C3.9	F56C3.9	[GO:0005515] MOLECULAR_FUNCTION protein binding (IEA)	WBGene00018946
190781_at	0.48179	0.0035	4.124	0.020623	17.703	0.449849	0.630786	9.30354	1191.44	rgs-11	F45B8.1	[GO:0004871] MOLECULAR_FUNCTION signal transducer activity (IEA)	WBGene00004354	180727_at	0.26538	0.0023	3.0758	0.027655	12.754	0.135842	0.362124	6.9759	20.7916	F49F1.5	F49F1.5		WBGene00018645
190801_at	0.47447	0.0003	3.7283	0.028698	4.543	0.379365	0.464293	1.60125	87.0265	nhr-182	F41B5.9	[GO:0003700] MOLECULAR_FUNCTION transcription factor activity (IEA) | [GO:0003707] MOLECULAR_FUNCTION steroid hormone receptor activity (IEA) | [GO:0005634] CELLULAR_COMPONENT nucleus (IEA) | [GO:0006355] BIOLOGICAL_PROCESS regulation of transcription, DNA-dependent (IEA) | [GO:0008270] MOLECULAR_FUNCTION zinc ion binding (IEA) | [GO:0043565] MOLECULAR_FUNCTION sequence-specific DNA binding (IEA)	WBGene00018265	180765_at	0.33659	0.001	3.6466	0.013522	3.523	0.331683	0.942362	3.13142	6806.42	clec-218	W02D7.2	[GO:0005488] MOLECULAR_FUNCTION binding (IEA)	WBGene00020938
190816_at	0.5101	0.0032	3.5374	0.033866	8.025	0.390947	0.410384	6.11809	1234.29	tag-38	B0222.4	[GO:0016831] MOLECULAR_FUNCTION carboxy-lyase activity (IEA) | [GO:0019752] BIOLOGICAL_PROCESS carboxylic acid metabolic process (IEA) | [GO:0030170] MOLECULAR_FUNCTION pyridoxal phosphate binding (IEA) | [GO:0003824] MOLECULAR_FUNCTION catalytic activity (IEA)	WBGene00006418	180837_at	0.31136	0.0042	3.5571	0.015095	13.428	0.213356	0.473193	2.86069	25797.1	ttr-30	T08A9.2	[GO:0016021] CELLULAR_COMPONENT integral to membrane (IEA)	WBGene00020335
190842_at	0.39326	0.005	3.564	0.033084	8.43	0.468915	0.666129	4.69429	638.346	nhr-134	F44C8.2	[GO:0003700] MOLECULAR_FUNCTION transcription factor activity (IEA) | [GO:0003707] MOLECULAR_FUNCTION steroid hormone receptor activity (IEA) | [GO:0005634] CELLULAR_COMPONENT nucleus (IEA) | [GO:0006355] BIOLOGICAL_PROCESS regulation of transcription, DNA-dependent (IEA) | [GO:0008270] MOLECULAR_FUNCTION zinc ion binding (IEA) | [GO:0043565] MOLECULAR_FUNCTION sequence-specific DNA binding (IEA)	WBGene00003724	180855_s_at	0.78576	0	18.8459	1.3e-07	19.042	0.708132	0.851242	7.07361	6507.22	paf-2	C52B9.7	[GO:0010172] BIOLOGICAL_PROCESS embryonic body morphogenesis (IMP) via [WBPaper00024453] Inoue T et al. (2004) | [GO:0009792] BIOLOGICAL_PROCESS embryonic development ending in birth or egg hatching (IMP) via [WBPaper00024453] Inoue T et al. (2004) | [GO:0003847] MOLECULAR_FUNCTION 1-alkyl-2-acetylglycerophosphocholine esterase activity (IMP) via [WBPaper00024453] Inoue T et al. (2004) | [GO:0003…	WBGene00003907
190852_at	0.36617	0.0017	4.3353	0.0174	7.49	0.525691	0.708732	3.50618	268576	gst-13	T26C5.1		WBGene00001761	180860_at	0.34374	0.0011	2.7952	0.039757	21.091	0.106756	0.572108	3.09925	16.0019	E02H9.9	E02H9.9		WBGene00017106
190853_at	0.39344	0.0122	4.0415	0.022064	8.769	0.418802	0.566277	1.7324	668472	ttr-16	Y5F2A.1		WBGene00012382	180879_at	0.27584	0.005	3.0388	0.028999	19.021	0.427584	0.726368	3.21532	25.2817	lim-9	F25H5.1	[GO:0031430] CELLULAR_COMPONENT M band (IDA) via [WBPaper00030924] Qadota H et al. (2007) | [GO:0008270] MOLECULAR_FUNCTION zinc ion binding (IEA)	WBGene00006407
190895_at	0.31554	0.0078	3.3619	0.039574	8.229	0.282598	0.461767	4.28854	6435.86	ugt-2	AC3.8	[GO:0008152] BIOLOGICAL_PROCESS metabolic process (IEA) | [GO:0016758] MOLECULAR_FUNCTION transferase activity, transferring hexosyl groups (IEA) | [GO:0016021] CELLULAR_COMPONENT integral to membrane (IEA)	WBGene00007073	180883_at	0.36797	0.0018	3.0416	0.028896	9.527	0.161527	0.45917	7.85748	997.796	Y42A5A.3	Y42A5A.3		WBGene00012778
190900_s_at	0.49241	0.0016	4.7559	0.012568	6.476	0.516901	0.673124	3.9969	156184	hsp-25	C09B8.6		WBGene00002023	180902_s_at	0.3548	0.0015	6.6118	0.00053256	20.19	0.466699	0.758176	2.2565	23441.4	psf-1	F25B5.7	[GO:0003676] MOLECULAR_FUNCTION nucleic acid binding (IEA) | [GO:0000166] MOLECULAR_FUNCTION nucleotide binding (IEA) | [GO:0016021] CELLULAR_COMPONENT integral to membrane (IEA) | [GO:0002009] BIOLOGICAL_PROCESS morphogenesis of an epithelium (IMP) | [GO:0002119] BIOLOGICAL_PROCESS nematode larval development (IMP) | [GO:0040007] BIOLOGICAL_PROCESS growth (IMP)	WBGene00017778
190917_at	0.5389	0.0013	7.2124	0.0024767	7.318	0.601316	0.751233	4.14387	6468.11	bre-1	C53B4.7	[GO:0019673] BIOLOGICAL_PROCESS GDP-mannose metabolic process (IDA) via [WBPaper00027362] Rhomberg S et al. (2006) | [GO:0019673] BIOLOGICAL_PROCESS GDP-mannose metabolic process (IEA) | [GO:0042350] BIOLOGICAL_PROCESS GDP-L-fucose biosynthetic process (IDA) via [WBPaper00027362] Rhomberg S et al. (2006) | [GO:0008446] MOLECULAR_FUNCTION GDP-mannose 4,6-dehydratase activity (IDA) via [WBPaper0002…	WBGene00000266	180909_at	0.4885	0	10.3102	2.28e-05	9.053	0.587949	0.812534	42.8642	54521.5	C32H11.4	C32H11.4		WBGene00007867
190930_at	0.47142	0.0032	3.288	0.042302	6.956	0.352686	0.519611	2.45637	64025.8	DC2.3	DC2.3	[GO:0005529] MOLECULAR_FUNCTION sugar binding (IEA) | [GO:0005801] CELLULAR_COMPONENT cis-Golgi network (IEA) | [GO:0006888] BIOLOGICAL_PROCESS ER to Golgi vesicle-mediated transport (IEA) | [GO:0016021] CELLULAR_COMPONENT integral to membrane (IEA)	WBGene00017080	180917_at	0.58973	0	9.4451	4.45e-05	8.933	0.584744	0.753669	9.99962	3685.67	W02D7.4	W02D7.4		WBGene00020940
190955_s_at	0.50189	0.0058	4.3714	0.016911	7.553	0.456417	0.658095	2.82238	124457	ttr-18	B0334.1		WBGene00007142	180921_at	0.40703	0.0008	4.1955	0.0069998	21.764	0.3975	0.677026	2.51055	12279	exos-1	Y48A6B.5	[GO:0009792] BIOLOGICAL_PROCESS embryonic development ending in birth or egg hatching (IMP) | [GO:0040018] BIOLOGICAL_PROCESS positive regulation of multicellular organism growth (IMP) | [GO:0000003] BIOLOGICAL_PROCESS reproduction (IMP) | [GO:0040010] BIOLOGICAL_PROCESS positive regulation of growth rate (IMP)	WBGene00012966
190970_s_at	0.39226	0.0067	4.9167	0.011144	8.2	0.458639	0.799181	2.83309	119159	Y106G6D.8	Y106G6D.8		WBGene00013704	180936_at	0.36757	0.001	4.9886	0.0028432	5.175	0.46875	0.573526	5.58081	267.649	ZC196.5	ZC196.5	[GO:0016021] CELLULAR_COMPONENT integral to membrane (IEA)	WBGene00022549
190989_at	0.52173	0.0021	3.4109	0.037877	16.91	0.317648	0.647804	2.79785	42171.7	B0303.15	B0303.15	[GO:0003735] MOLECULAR_FUNCTION structural constituent of ribosome (IEA) | [GO:0005622] CELLULAR_COMPONENT intracellular (IEA) | [GO:0005840] CELLULAR_COMPONENT ribosome (IEA) | [GO:0006412] BIOLOGICAL_PROCESS translation (IEA) | [GO:0002119] BIOLOGICAL_PROCESS nematode larval development (IMP) | [GO:0040007] BIOLOGICAL_PROCESS growth (IMP) | [GO:0040010] BIOLOGICAL_PROCESS positive regulation of…	WBGene00015133	180945_s_at	0.35042	0.001	4.7869	0.0035555	4.425	0.31501	0.752717	9.15523	9971.75	F49C12.7	F49C12.7		WBGene00009877
191038_at	0.431	0.017	4.3329	0.017434	8.487	0.383521	0.781881	15.478	7007.91	tsp-1	C02F5.8	[GO:0016021] CELLULAR_COMPONENT integral to membrane (IEA)	WBGene00006627	180950_at	0.37767	0.0005	4.1786	0.0071401	8.137	0.181702	0.42196	3.31703	25.3191	F52C6.1	F52C6.1
191084_at	0.41609	0.0059	4.696	0.013151	8.564	0.426318	0.737125	4.0979	38268.3	ttr-54	T14G10.4		WBGene00011774	180973_at	0.22898	0.0183	4.1149	0.0076961	11.903	0.39864	0.693114	11.7329	6736.68	F49F1.6	F49F1.6	[GO:0040010] BIOLOGICAL_PROCESS positive regulation of growth rate (IMP)	WBGene00018646
191098_at	0.36605	0.0051	4.5299	0.014938	9.551	0.415011	0.693426	2.59159	81765.5	ttr-24	Y51A2D.9		WBGene00013077	180974_at	0.26539	0.0072	5.8673	0.0011182	17.102	0.290337	0.730867	1.83227	40.0461	C09H10.5	C09H10.5		WBGene00007499
191156_at	0.45419	0.0043	3.5236	0.034278	6.705	0.337786	0.867567	1.84876	4217.53	C08B6.10	C08B6.10		WBGene00007430	181014_at	0.53516	0	10.1482	2.57e-05	23.765	0.595683	0.952044	17.0005	4601.36	C39H7.4	C39H7.4	[GO:0016021] CELLULAR_COMPONENT integral to membrane (IEA)	WBGene00016542
191196_s_at	0.49323	0.0058	4.319	0.017628	6.404	0.465569	0.476403	2.09344	138138	C05G5.4	C05G5.4	[GO:0003824] MOLECULAR_FUNCTION catalytic activity (IEA) | [GO:0008152] BIOLOGICAL_PROCESS metabolic process (IEA) | [GO:0005488] MOLECULAR_FUNCTION binding (IEA) | [GO:0003878] MOLECULAR_FUNCTION ATP citrate synthase activity (IEA) | [GO:0004775] MOLECULAR_FUNCTION succinate-CoA ligase (ADP-forming) activity (IEA)	WBGene00007350	181021_at	0.20636	0.0019	3.9298	0.0095917	10.954	0.109345	0.922694	1.9189	10.8921	F59D6.1	F59D6.1		WBGene00019103
191219_at	0.37769	0.0077	3.4576	0.036334	7.407	0.427906	0.573517	13.654	11454.3	Y41C4A.11	Y41C4A.11	[GO:0016021] CELLULAR_COMPONENT integral to membrane (IEA)	WBGene00012757	181023_s_at	0.48858	0.0002	8.1066	0.0001352	20.004	0.523917	0.827986	2.98771	6047.77	T11F9.12	T11F9.12	[GO:0016021] CELLULAR_COMPONENT integral to membrane (IEA)	WBGene00011713
191221_at	0.40232	0.0038	4.5786	0.014386	6.448	0.494643	0.567525	2.76227	73926.3	gst-36	R07B1.4		WBGene00001784	181027_at	0.29721	0.004	2.7611	0.04157	8.408	0.0780934	0.179622	1.96155	11.5195	lact-8	Y42A5A.2	[GO:0016021] CELLULAR_COMPONENT integral to membrane (IEA)	WBGene00012777
191294_at	0.35405	0.0108	3.972	0.023368	3.718	0.552347	0.862442	1.60732	1849.28	ZC373.1	ZC373.1	[GO:0003824] MOLECULAR_FUNCTION catalytic activity (IEA) | [GO:0008152] BIOLOGICAL_PROCESS metabolic process (IEA) | [GO:0030170] MOLECULAR_FUNCTION pyridoxal phosphate binding (IEA)	WBGene00013866	181034_at	0.41216	0.0008	4.9415	0.0029945	21.07	0.284339	0.614509	5.77068	1257.27	Y9C9A.8	Y9C9A.8	[GO:0016021] CELLULAR_COMPONENT integral to membrane (IEA)	WBGene00021178
191303_at	0.43652	0.0042	4.0356	0.022171	6.766	0.400061	0.603524	4.73212	6471.84	gst-29	Y53F4B.32		WBGene00001777	181065_at	0.33817	0.0041	3.1096	0.026485	0.98	0.140129	0.516285	5.46991	588.983	clc-3	ZK563.4	[GO:0016021] CELLULAR_COMPONENT integral to membrane (IEA)	WBGene00000524
191331_at	0.34987	0.0103	4.5349	0.014881	5.571	0.55277	0.841876	4.35315	11980.3	gst-28	Y53F4B.31		WBGene00001776	181076_at	0.51556	0	6.5367	0.00057288	20.643	0.391036	0.727037	3.869	75214.1	C53H9.2	C53H9.2	[GO:0005525] MOLECULAR_FUNCTION GTP binding (IEA) | [GO:0005622] CELLULAR_COMPONENT intracellular (IEA) | [GO:0040010] BIOLOGICAL_PROCESS positive regulation of growth rate (IMP) | [GO:0009792] BIOLOGICAL_PROCESS embryonic development ending in birth or egg hatching (IMP) | [GO:0002119] BIOLOGICAL_PROCESS nematode larval development (IMP) | [GO:0040007] BIOLOGICAL_PROCESS growth (IMP) | [GO:00000…	WBGene00016907
191351_s_at	0.46382	0.0048	5.7096	0.0063572	17.947	0.545497	0.564819	2.25251	1770.78	C46F11.4	C46F11.4	[GO:0003676] MOLECULAR_FUNCTION nucleic acid binding (IEA) | [GO:0005524] MOLECULAR_FUNCTION ATP binding (IEA) | [GO:0008026] MOLECULAR_FUNCTION ATP-dependent helicase activity (IEA) | [GO:0004386] MOLECULAR_FUNCTION helicase activity (IEA) | [GO:0000003] BIOLOGICAL_PROCESS reproduction (IMP) | [GO:0040010] BIOLOGICAL_PROCESS positive regulation of growth rate (IMP)	WBGene00008119	181080_at	0.26089	0.0105	2.9207	0.033767	9.908	0.212939	0.524985	2.38296	162213	ZK813.2	ZK813.2		WBGene00022821
191407_s_at	0.34265	0.0189	9.011	0.00094235	7.496	0.650613	0.793151	2.54125	6950.51	F21D5.3	F21D5.3	[GO:0005507] MOLECULAR_FUNCTION copper ion binding (IEA) | [GO:0016491] MOLECULAR_FUNCTION oxidoreductase activity (IEA)	WBGene00009008	181103_s_at	0.27747	0.0149	4.6424	0.004183	12.286	0.227954	0.641949	2.37137	13079.4	hoe-1	E04A4.4	[GO:0002119] BIOLOGICAL_PROCESS nematode larval development (IMP) via [WBPaper00006401] Smith MM et al. (2004) | [GO:0007281] BIOLOGICAL_PROCESS germ cell development (IMP) via [WBPaper00006401] Smith MM et al. (2004) | [GO:0007126] BIOLOGICAL_PROCESS meiosis (IMP) via [WBPaper00006401] Smith MM et al. (2004) | [GO:0040026] BIOLOGICAL_PROCESS positive regulation of vulval development (IGI) via [W…	WBGene00001983
191435_s_at	0.4004	0.0065	3.4764	0.035735	8.366	0.310234	0.462825	4.89065	3063.6	oat-1	T01B11.7	[GO:0005215] MOLECULAR_FUNCTION transporter activity (IEA) | [GO:0006810] BIOLOGICAL_PROCESS transport (IEA) | [GO:0016020] CELLULAR_COMPONENT membrane (IEA) | [GO:0016021] CELLULAR_COMPONENT integral to membrane (IEA)	WBGene00003837	181109_at	0.32372	0.0024	3.4589	0.017048	18.181	0.247315	0.783938	6.90851	2426.7	B0507.2	B0507.2		WBGene00015219
191502_at	0.57956	0.0017	7.2881	0.0023704	6.405	0.61744	0.63648	5.48789	688.909	ugt-18	ZC443.5	[GO:0008152] BIOLOGICAL_PROCESS metabolic process (IEA) | [GO:0016758] MOLECULAR_FUNCTION transferase activity, transferring hexosyl groups (IEA) | [GO:0016021] CELLULAR_COMPONENT integral to membrane (IEA)	WBGene00013900	181121_at	0.44237	0.0001	4.5906	0.0044361	4.563	0.433559	0.660505	8.30339	982.333	C46F2.1	C46F2.1		WBGene00016714
191561_s_at	0.41842	0.015	4.0977	0.021071	18.247	0.433161	0.548489	1.96556	9641.91	apb-3	R11A5.1	[GO:0007040] BIOLOGICAL_PROCESS lysosome organization and biogenesis (IMP) via [WBPaper00025094] Hermann GJ et al. (2005) | [GO:0009792] BIOLOGICAL_PROCESS embryonic development ending in birth or egg hatching (IGI) via [WBPaper00030865] Holmes A et al. (2007) | [GO:0009792] BIOLOGICAL_PROCESS embryonic development ending in birth or egg hatching (IMP) | [GO:0005515] MOLECULAR_FUNCTION protein bi…	WBGene00000163	181122_at	0.43475	0	4.5473	0.0046599	8.655	0.354428	0.788794	5.91002	4206.74	F23F1.7	F23F1.7		WBGene00017748
191583_s_at	0.49274	0.0003	8.0917	0.0015151	7.645	0.625126	0.757422	2.50578	157610	F13H8.7	F13H8.7	[GO:0006807] BIOLOGICAL_PROCESS nitrogen compound metabolic process (IEA) | [GO:0016810] MOLECULAR_FUNCTION hydrolase activity, acting on carbon-nitrogen (but not peptide) bonds (IEA) | [GO:0000003] BIOLOGICAL_PROCESS reproduction (IMP)	WBGene00017440	181125_at	0.54206	0	6.1511	0.0008386	20.614	0.509509	0.808814	2.74892	1315.45	nhr-121	E02H9.8	[GO:0003700] MOLECULAR_FUNCTION transcription factor activity (IEA) | [GO:0003707] MOLECULAR_FUNCTION steroid hormone receptor activity (IEA) | [GO:0005634] CELLULAR_COMPONENT nucleus (IEA) | [GO:0006355] BIOLOGICAL_PROCESS regulation of transcription, DNA-dependent (IEA) | [GO:0008270] MOLECULAR_FUNCTION zinc ion binding (IEA) | [GO:0043565] MOLECULAR_FUNCTION sequence-specific DNA binding (IEA)	WBGene00003711
191587_at	0.50961	0.0044	3.1154	0.049558	17.286	0.257423	0.763336	8.74586	8421.08	uev-3	F26H9.7	[GO:0019787] MOLECULAR_FUNCTION small conjugating protein ligase activity (IEA) | [GO:0043687] BIOLOGICAL_PROCESS post-translational protein modification (IEA) | [GO:0051246] BIOLOGICAL_PROCESS regulation of protein metabolic process (IEA)	WBGene00006732	181132_s_at	0.53627	0	8.3521	0.00010942	9.72	0.565791	0.939311	18.1616	2603.12	F49F1.7	F49F1.7		WBGene00018647
191625_s_at	0.57668	0.0013	7.6967	0.0018803	7.422	0.622836	0.845623	3.63	13246.1	ttr-3	K03H1.3		WBGene00010538	181152_at	0.29171	0.0038	2.6281	0.049514	4.335	0.148906	0.655028	1.51046	613233	spp-2	T08A9.12		WBGene00004987
191651_at	0.38588	0.0042	3.7659	0.027792	6.046	0.352753	0.579819	3.50622	1790.51	ZC518.1	ZC518.1	[GO:0016021] CELLULAR_COMPONENT integral to membrane (IEA)	WBGene00013921	181156_at	0.51872	0	5.957	0.0010203	4.458	0.474819	0.899162	3.0085	92375.3	spp-4	T08A9.8	[GO:0016021] CELLULAR_COMPONENT integral to membrane (IEA)	WBGene00004989
191693_at	0.39626	0.0058	3.9565	0.023671	6.394	0.418487	0.52973	3.18481	74921.6	gst-42	D1053.1	[GO:0003824] MOLECULAR_FUNCTION catalytic activity (IEA) | [GO:0005737] CELLULAR_COMPONENT cytoplasm (IEA) | [GO:0009072] BIOLOGICAL_PROCESS aromatic amino acid family metabolic process (IEA)	WBGene00001790	181236_at	0.51405	0	10.1999	2.47e-05	18.944	0.494656	0.929855	10.0485	46.0643	bath-47	T07H3.1	[GO:0005515] MOLECULAR_FUNCTION protein binding (IEA)	WBGene00006464
191733_at	0.50986	0.0033	3.796	0.02709	16.944	0.389186	0.661188	5.32677	105225	M05D6.2	M05D6.2		WBGene00010875	181259_at	0.45795	0.0003	4.4884	0.0049844	5.529	0.328603	0.808257	6.00101	30558.6	clec-51	B0218.6	[GO:0005488] MOLECULAR_FUNCTION binding (IEA)	WBGene00015050
191735_at	0.45388	0.0093	3.5694	0.03293	9.123	0.39013	0.495213	2.20165	13220.1	T03D8.6	T03D8.6	[GO:0003840] MOLECULAR_FUNCTION gamma-glutamyltransferase activity (IEA) | [GO:0016021] CELLULAR_COMPONENT integral to membrane (IEA)	WBGene00011393	181282_at	0.29684	0.0007	4.0094	0.0087218	1.777	0.264757	0.670378	2.88586	68.5161	W03G11.2	W03G11.2	[GO:0016020] CELLULAR_COMPONENT membrane (IEA) | [GO:0016021] CELLULAR_COMPONENT integral to membrane (IEA)	WBGene00012224
191756_s_at	0.35572	0.0111	5.6334	0.0066956	8.082	0.527023	0.759314	2.60471	220.452	R10D12.1	R10D12.1	[GO:0005215] MOLECULAR_FUNCTION transporter activity (IEA) | [GO:0006810] BIOLOGICAL_PROCESS transport (IEA) | [GO:0016021] CELLULAR_COMPONENT integral to membrane (IEA)	WBGene00011185	181290_at	0.33726	0.0007	4.7586	0.00367	19.281	0.209539	0.903362	2.42332	17.7848	F22F7.2	F22F7.2	[GO:0003824] MOLECULAR_FUNCTION catalytic activity (IEA) | [GO:0005488] MOLECULAR_FUNCTION binding (IEA) | [GO:0008152] BIOLOGICAL_PROCESS metabolic process (IEA)	WBGene00017720
191772_at	0.4106	0.0189	7.3221	0.0023244	5.612	0.604533	0.874114	1.83347	8266.64	C02F5.7	C02F5.7		WBGene00015350	181305_s_at	0.39482	0.0008	7.7644	0.00018268	18.098	0.421899	0.604791	2.12633	417416	pmt-1	ZK622.3	[GO:0009792] BIOLOGICAL_PROCESS embryonic development ending in birth or egg hatching (IMP) | [GO:0002119] BIOLOGICAL_PROCESS nematode larval development (IMP) | [GO:0040007] BIOLOGICAL_PROCESS growth (IMP) | [GO:0040010] BIOLOGICAL_PROCESS positive regulation of growth rate (IMP) | [GO:0040017] BIOLOGICAL_PROCESS positive regulation of locomotion (IMP) | [GO:0040011] BIOLOGICAL_PROCESS locomotio…	WBGene00022781
191788_at	0.49657	0.003	3.1634	0.04741	6.382	0.343812	0.44715	3.45287	893.562	T27D12.1	T27D12.1	[GO:0005215] MOLECULAR_FUNCTION transporter activity (IEA) | [GO:0006810] BIOLOGICAL_PROCESS transport (IEA) | [GO:0016021] CELLULAR_COMPONENT integral to membrane (IEA)	WBGene00012085	181307_at	0.71777	0	12.5661	4.64e-06	8.474	0.655965	0.83364	3.38897	1547.6	ceeh-1	K02F3.6	[GO:0003824] MOLECULAR_FUNCTION catalytic activity (IEA) | [GO:0016787] MOLECULAR_FUNCTION hydrolase activity (IEA) | [GO:0016021] CELLULAR_COMPONENT integral to membrane (IEA)	WBGene00019329
191814_at	0.52048	0.0047	3.2638	0.043243	16.646	0.246733	0.799346	9.07886	3636.1	C30B5.4	C30B5.4	[GO:0003676] MOLECULAR_FUNCTION nucleic acid binding (IEA) | [GO:0000166] MOLECULAR_FUNCTION nucleotide binding (IEA) | [GO:0009792] BIOLOGICAL_PROCESS embryonic development ending in birth or egg hatching (IMP) | [GO:0002119] BIOLOGICAL_PROCESS nematode larval development (IMP) | [GO:0040007] BIOLOGICAL_PROCESS growth (IMP)	WBGene00016245	181310_at	0.46973	0.0001	5.661	0.0013841	18.124	0.399458	0.872426	4.33612	96.8569	Y38H6C.9	Y38H6C.9		WBGene00012622
191832_at	0.5509	0.0015	4.821	0.011968	6.684	0.47856	0.551957	2.05732	120641	ucr-2.1	VW06B3R.1	[GO:0003824] MOLECULAR_FUNCTION catalytic activity (IEA) | [GO:0046872] MOLECULAR_FUNCTION metal ion binding (IEA) | [GO:0004222] MOLECULAR_FUNCTION metalloendopeptidase activity (IEA) | [GO:0006508] BIOLOGICAL_PROCESS proteolysis (IEA)	WBGene00012158	181318_at	0.26916	0.0094	2.7712	0.041023	9.402	0.0799385	0.417606	1.82674	36523.5	W04C9.2	W04C9.2		WBGene00021024
191861_at	0.42467	0.0047	3.6591	0.030458	7.182	0.340631	0.622527	4.47342	3404	crp-1	Y32F6B.3	[GO:0005802] CELLULAR_COMPONENT trans-Golgi network (IDA) via [WBPaper00025137] Jenna S et al. (2005) | [GO:0055037] CELLULAR_COMPONENT recycling endosome (IDA) via [WBPaper00025137] Jenna S et al. (2005) | [GO:0005525] MOLECULAR_FUNCTION GTP binding (IEA) | [GO:0007264] BIOLOGICAL_PROCESS small GTPase mediated signal transduction (IEA) | [GO:0005622] CELLULAR_COMPONENT intracellular (IEA) | [GO:…	WBGene00012532	181334_s_at	0.59553	0	8.0939	0.00013669	5.853	0.42111	0.928362	6.05618	618.489	C27H5.4	C27H5.4	[GO:0016021] CELLULAR_COMPONENT integral to membrane (IEA) | [GO:0009792] BIOLOGICAL_PROCESS embryonic development ending in birth or egg hatching (IMP) | [GO:0002119] BIOLOGICAL_PROCESS nematode larval development (IMP) | [GO:0040007] BIOLOGICAL_PROCESS growth (IMP) | [GO:0000003] BIOLOGICAL_PROCESS reproduction (IMP) | [GO:0040010] BIOLOGICAL_PROCESS positive regulation of growth rate (IMP)	WBGene00016174
191879_at	0.33815	0.016	3.5717	0.032863	7.588	0.41837	0.538876	2.43109	1874.07	D2045.8	D2045.8	[GO:0005515] MOLECULAR_FUNCTION protein binding (IEA) | [GO:0000003] BIOLOGICAL_PROCESS reproduction (IMP)	WBGene00008425	181368_at	0.27306	0.0013	3.7376	0.012098	16.59	0.163666	0.437511	2.73891	14.6153	bath-46	T07H3.2	[GO:0005515] MOLECULAR_FUNCTION protein binding (IEA)	WBGene00020325
192001_at	0.29965	0.0197	4.4129	0.016367	19.567	0.552814	0.902935	2.91759	7496.44	lsd-1	T08D10.2	[GO:0003824] MOLECULAR_FUNCTION catalytic activity (IEA) | [GO:0005488] MOLECULAR_FUNCTION binding (IEA) | [GO:0008152] BIOLOGICAL_PROCESS metabolic process (IEA) | [GO:0016021] CELLULAR_COMPONENT integral to membrane (IEA)	WBGene00011615	181403_at	0.43941	0.0003	4.7935	0.0035296	8.976	0.301547	0.496457	4.04336	4400.43	K04A8.1	K04A8.1	[GO:0016021] CELLULAR_COMPONENT integral to membrane (IEA)	WBGene00019373
192021_at	0.48653	0.0019	9.0304	0.00093334	20.242	0.699119	0.861956	5.02645	3963.76	pzf-1	T05G11.1	[GO:0008270] MOLECULAR_FUNCTION zinc ion binding (IEA) | [GO:0005622] CELLULAR_COMPONENT intracellular (IEA)	WBGene00011505	181414_at	0.37297	0.0011	4.6935	0.0039485	11.723	0.196183	0.587828	5.58685	1035.61	F41C3.1	F41C3.1		WBGene00018267
192022_at	0.55388	0.0006	6.0522	0.0050622	17.426	0.534881	0.717087	5.40578	3003.46	ceh-40	F17A2.5	[GO:0003700] MOLECULAR_FUNCTION transcription factor activity (IEA) | [GO:0005634] CELLULAR_COMPONENT nucleus (IEA) | [GO:0006355] BIOLOGICAL_PROCESS regulation of transcription, DNA-dependent (IEA) | [GO:0043565] MOLECULAR_FUNCTION sequence-specific DNA binding (IEA) | [GO:0003677] MOLECULAR_FUNCTION DNA binding (IEA) | [GO:0045449] BIOLOGICAL_PROCESS regulation of transcription (IEA) | [GO:0009…	WBGene00000461	181416_s_at	0.26594	0.0128	4.1604	0.0072944	0.576	0.341166	0.848398	2.78364	10770.1	W09B6.4	W09B6.4		WBGene00021104
192025_s_at	0.46122	0.0108	3.6607	0.030417	17.371	0.413092	0.545895	2.02047	50374.1	F54C8.4	F54C8.4	[GO:0006470] BIOLOGICAL_PROCESS protein amino acid dephosphorylation (IEA) | [GO:0008138] MOLECULAR_FUNCTION protein tyrosine/serine/threonine phosphatase activity (IEA) | [GO:0016311] BIOLOGICAL_PROCESS dephosphorylation (IEA) | [GO:0016791] MOLECULAR_FUNCTION phosphatase activity (IEA) | [GO:0004725] MOLECULAR_FUNCTION protein tyrosine phosphatase activity (IEA) | [GO:0009792] BIOLOGICAL_PROCES…	WBGene00010037	181428_at	0.53291	0	10.6366	1.78e-05	19.492	0.590753	0.804076	5.41617	144.773	F13B6.1	F13B6.1		WBGene00017416
192032_s_at	0.53913	0.0026	4.6035	0.014113	5.646	0.448326	0.65573	1.66448	216803	tag-320	B0403.4	[GO:0016853] MOLECULAR_FUNCTION isomerase activity (IEA) | [GO:0045454] BIOLOGICAL_PROCESS cell redox homeostasis (IEA) | [GO:0002119] BIOLOGICAL_PROCESS nematode larval development (IMP) | [GO:0040007] BIOLOGICAL_PROCESS growth (IMP) | [GO:0040011] BIOLOGICAL_PROCESS locomotion (IMP)	WBGene00015168	181431_at	0.66612	0	13.7864	2.12e-06	18.475	0.607222	0.891896	21.8885	859.555	B0507.3	B0507.3		WBGene00015220
192037_at	0.61846	0.0008	7.8112	0.0017648	6.105	0.639933	0.734996	2.20412	4740.48	atgp-1	F26D10.9	[GO:0005886] CELLULAR_COMPONENT plasma membrane (IDA) via [WBPaper00006408] Veljkovic E et al. (2004) | [GO:0003824] MOLECULAR_FUNCTION catalytic activity (IEA) | [GO:0005975] BIOLOGICAL_PROCESS carbohydrate metabolic process (IEA) | [GO:0043169] MOLECULAR_FUNCTION cation binding (IEA) | [GO:0016021] CELLULAR_COMPONENT integral to membrane (IEA)	WBGene00000224	181440_at	0.25986	0.0111	3.22	0.023012	2.24	0.204274	0.686584	5.76912	25.1152	D1014.5	D1014.5	[GO:0016021] CELLULAR_COMPONENT integral to membrane (IEA)	WBGene00017018
192178_s_at	0.4745	0.0032	3.1396	0.048463	15.859	0.266478	0.622458	3.05213	74049.1	ima-1	T19B10.7	[GO:0005654] CELLULAR_COMPONENT nucleoplasm (IDA) via [WBPaper00004711] Geles KG et al. (2001) | [GO:0005515] MOLECULAR_FUNCTION protein binding (IPI) via [WBPaper00004711] Geles KG et al. (2001) | [GO:0005634] CELLULAR_COMPONENT nucleus (IEA) | [GO:0005643] CELLULAR_COMPONENT nuclear pore (IEA) | [GO:0005737] CELLULAR_COMPONENT cytoplasm (IEA) | [GO:0006606] BIOLOGICAL_PROCESS protein import int…	WBGene00002072	181460_at	0.28106	0.0066	2.8498	0.037023	20.106	0.233762	0.771017	3.26123	6942.75	lgc-32	T19D7.1	[GO:0016021] CELLULAR_COMPONENT integral to membrane (IEA)	WBGene00020569
192189_at	0.40199	0.0032	3.2657	0.04317	7.133	0.323311	0.433161	2.1534	682.382	nhr-57	T05B4.2	[GO:0003700] MOLECULAR_FUNCTION transcription factor activity (IEA) | [GO:0003707] MOLECULAR_FUNCTION steroid hormone receptor activity (IEA) | [GO:0005634] CELLULAR_COMPONENT nucleus (IEA) | [GO:0006355] BIOLOGICAL_PROCESS regulation of transcription, DNA-dependent (IEA) | [GO:0008270] MOLECULAR_FUNCTION zinc ion binding (IEA) | [GO:0043565] MOLECULAR_FUNCTION sequence-specific DNA binding (IEA)	WBGene00003647	181484_s_at	0.25779	0.0048	2.809	0.039046	20.019	0.128751	0.282696	2.27117	240.053	lim-9	F25H5.1	[GO:0031430] CELLULAR_COMPONENT M band (IDA) via [WBPaper00030924] Qadota H et al. (2007) | [GO:0008270] MOLECULAR_FUNCTION zinc ion binding (IEA)	WBGene00006407
192193_at	0.41823	0.0005	4.8241	0.01194	7.107	0.518236	0.80618	2.45149	1052.69	F43C9.2	F43C9.2	[GO:0005509] MOLECULAR_FUNCTION calcium ion binding (IEA)	WBGene00018376	181491_at	0.27159	0.0027	3.045	0.02877	5.08	0.140451	0.723583	2.81283	186.28	F44D12.9	F44D12.9	[GO:0005337] MOLECULAR_FUNCTION nucleoside transmembrane transporter activity (IEA) | [GO:0006810] BIOLOGICAL_PROCESS transport (IEA) | [GO:0016020] CELLULAR_COMPONENT membrane (IEA) | [GO:0016021] CELLULAR_COMPONENT integral to membrane (IEA)	WBGene00009686
192225_at	0.36831	0.0181	3.4187	0.037615	5.723	0.36052	0.412397	1.94069	9620.15	T14D7.1	T14D7.1	[GO:0008152] BIOLOGICAL_PROCESS metabolic process (IEA) | [GO:0003824] MOLECULAR_FUNCTION catalytic activity (IEA) | [GO:0030170] MOLECULAR_FUNCTION pyridoxal phosphate binding (IEA)	WBGene00011767	181498_s_at	0.29618	0.0044	3.3854	0.018686	9.79	0.293189	0.718522	5.93349	7023.51	Y48B6A.6	Y48B6A.6	[GO:0005509] MOLECULAR_FUNCTION calcium ion binding (IEA)	WBGene00012980
192268_at	0.42917	0.005	3.166	0.047296	7.963	0.224417	0.786021	1.79683	7009.36	C02F12.5	C02F12.5	[GO:0004867] MOLECULAR_FUNCTION serine-type endopeptidase inhibitor activity (IEA)	WBGene00015355192268_at	181502_s_at	0.45865	0.0003	5.2116	0.0022297	20.387	0.41621	0.712895	5.0383	2283.41	oac-54	W07A12.6	[GO:0016747] MOLECULAR_FUNCTION transferase activity, transferring groups other than amino-acyl groups (IEA) | [GO:0016021] CELLULAR_COMPONENT integral to membrane (IEA) | [GO:0018991] BIOLOGICAL_PROCESS oviposition (IMP)	WBGene00012323
192343_s_at	0.44805	0.0071	3.1091	0.049848	6.438	0.359524	0.406061	1.95566	823057	rpl-11.2	F07D10.1	[GO:0003735] MOLECULAR_FUNCTION structural constituent of ribosome (IEA) | [GO:0005622] CELLULAR_COMPONENT intracellular (IEA) | [GO:0005840] CELLULAR_COMPONENT ribosome (IEA) | [GO:0006412] BIOLOGICAL_PROCESS translation (IEA) | [GO:0040010] BIOLOGICAL_PROCESS positive regulation of growth rate (IMP) | [GO:0009792] BIOLOGICAL_PROCESS embryonic development ending in birth or egg hatching (IMP) | …	WBGene00004423	181509_at	0.35764	0	3.1169	0.026237	2.31	0.128363	0.280198	2.20466	277595	C15H9.9	C15H9.9		WBGene00015803
192352_at	0.54495	0.0011	5.5724	0.0069814	17.337	0.575778	0.709922	2.17329	20562	zfp-2	F35H8.3	[GO:0005622] CELLULAR_COMPONENT intracellular (IEA) | [GO:0008270] MOLECULAR_FUNCTION zinc ion binding (IEA) | [GO:0003676] MOLECULAR_FUNCTION nucleic acid binding (IEA) | [GO:0009792] BIOLOGICAL_PROCESS embryonic development ending in birth or egg hatching (IMP) | [GO:0002009] BIOLOGICAL_PROCESS morphogenesis of an epithelium (IMP) | [GO:0002119] BIOLOGICAL_PROCESS nematode larval development (I…	WBGene00009448	181520_at	0.37245	0.0017	3.3145	0.020425	20.67	0.237628	0.509951	2.50334	1625.03	rhy-1	W07A12.7	[GO:0016747] MOLECULAR_FUNCTION transferase activity, transferring groups other than amino-acyl groups (IEA) | [GO:0016021] CELLULAR_COMPONENT integral to membrane (IEA) | [GO:0018991] BIOLOGICAL_PROCESS oviposition (IMP)	WBGene00012324
192396_at	0.58337	0.0004	5.5972	0.0068634	16.981	0.509817	0.70816	7.02886	33184.7	Y5F2A.4	Y5F2A.4	[GO:0005622] CELLULAR_COMPONENT intracellular (IEA) | [GO:0008270] MOLECULAR_FUNCTION zinc ion binding (IEA) | [GO:0003676] MOLECULAR_FUNCTION nucleic acid binding (IEA)	WBGene00012385	181531_s_at	0.56886	0	6.893	0.00040679	6.728	0.413366	0.7778	6.00718	171.108	F18A11.5	F18A11.5	[GO:0005515] MOLECULAR_FUNCTION protein binding (IEA) | [GO:0006511] BIOLOGICAL_PROCESS ubiquitin-dependent protein catabolic process (IEA)	WBGene00008932
192410_s_at	0.28135	0.0143	3.4431	0.036807	19.962	0.343111	0.691721	1.99376	329445	F58E10.3	F58E10.3	[GO:0003676] MOLECULAR_FUNCTION nucleic acid binding (IEA) | [GO:0005524] MOLECULAR_FUNCTION ATP binding (IEA) | [GO:0008026] MOLECULAR_FUNCTION ATP-dependent helicase activity (IEA) | [GO:0004386] MOLECULAR_FUNCTION helicase activity (IEA) | [GO:0009792] BIOLOGICAL_PROCESS embryonic development ending in birth or egg hatching (IMP) | [GO:0040010] BIOLOGICAL_PROCESS positive regulation of growth …	WBGene00010260	181537_s_at	0.44845	0.0001	9.0068	6.33e-05	19.198	0.484862	0.8282	3.83508	24330.3	K12H6.6	K12H6.6	[GO:0016021] CELLULAR_COMPONENT integral to membrane (IEA)	WBGene00019686
192450_at	0.50033	0.0005	8.3759	0.001303	8.049	0.647971	0.811869	2.82208	3351.08	cex-1	F56D1.6	[GO:0005509] MOLECULAR_FUNCTION calcium ion binding (IEA)	WBGene00023407	181538_at	0.22644	0.0187	3.3627	0.019225	11.488	0.208	0.506	2.03015	12.291	ZC416.2	ZC416.2		WBGene00022609
192451_s_at	0.50542	0.0035	5.6999	0.0063992	7.009	0.555102	0.653751	6.19494	1638.01	F21G4.1	F21G4.1	[GO:0005215] MOLECULAR_FUNCTION transporter activity (IEA) | [GO:0006810] BIOLOGICAL_PROCESS transport (IEA) | [GO:0016020] CELLULAR_COMPONENT membrane (IEA) | [GO:0016021] CELLULAR_COMPONENT integral to membrane (IEA)	WBGene00009023	181552_at	0.40916	0.0001	4.7948	0.0035245	10.132	0.32962	0.722042	6.57761	1888.31	T22B7.3	T22B7.3	[GO:0005737] CELLULAR_COMPONENT cytoplasm (IEA) | [GO:0016813] MOLECULAR_FUNCTION hydrolase activity, acting on carbon-nitrogen (but not peptide) bonds, in linear amidines (IEA)	WBGene00020672
192521_at	0.56654	0.0007	8.8807	0.0010058	6.44	0.672557	0.736695	2.24273	3509.16	vha-5	F35H10.4	[GO:0002119] BIOLOGICAL_PROCESS nematode larval development (IMP) via [WBPaper00004842] Oka T et al. (2001) | [GO:0043025] CELLULAR_COMPONENT cell soma (IDA) via [WBPaper00004842] Oka T et al. (2001) | [GO:0016471] CELLULAR_COMPONENT vacuolar proton-transporting V-type ATPase complex (IPI) via [WBPaper00004842] Oka T et al. (2001) | [GO:0015992] BIOLOGICAL_PROCESS proton transport (IEA) | [GO:001…	WBGene00006914	181553_at	0.21523	0.0145	2.9986	0.030538	13.258	0.162246	0.569164	4.60137	430.526	bath-1	F59H6.9	[GO:0005515] MOLECULAR_FUNCTION protein binding (IEA) | [GO:0009792] BIOLOGICAL_PROCESS embryonic development ending in birth or egg hatching (IMP)	WBGene00019139
192527_s_at	0.58856	0.0017	3.9143	0.02452	16.635	0.395276	0.621567	3.95436	36903.2	smn-1	C41G7.1	[GO:0005634] CELLULAR_COMPONENT nucleus (IDA) via [WBPaper00003775] Miguel-Aliaga I et al. (1999) | [GO:0005634] CELLULAR_COMPONENT nucleus (IEA) | [GO:0003676] MOLECULAR_FUNCTION nucleic acid binding (IEA) | [GO:0000245] BIOLOGICAL_PROCESS spliceosome assembly (IEA) | [GO:0003723] MOLECULAR_FUNCTION RNA binding (IEA) | [GO:0005737] CELLULAR_COMPONENT cytoplasm (IEA) | [GO:0006397] BIOLOGICAL_PRO…	WBGene00004887	181587_at	0.4362	0	9.0854	5.94e-05	14.839	0.494182	0.76137	3.48839	859.626	R01H10.4	R01H10.4		WBGene00010972
192551_at	0.36783	0.0025	4.3312	0.017458	7.651	0.438247	0.679034	2.45828	243308	gta-1	K04D7.3	[GO:0003867] MOLECULAR_FUNCTION 4-aminobutyrate transaminase activity (IEA) | [GO:0009448] BIOLOGICAL_PROCESS gamma-aminobutyric acid metabolic process (IEA) | [GO:0008483] MOLECULAR_FUNCTION transaminase activity (IEA) | [GO:0030170] MOLECULAR_FUNCTION pyridoxal phosphate binding (IEA) | [GO:0003824] MOLECULAR_FUNCTION catalytic activity (IEA)	WBGene00001794	181593_at	0.49243	0	5.4852	0.0016645	18.13	0.313965	0.547207	2.87925	139.446	F52D2.7	F52D2.7		WBGene00018689
192559_s_at	0.44445	0.005	3.959	0.023622	8.102	0.393229	0.704233	2.58167	241559	clec-65	F35C5.8	[GO:0005488] MOLECULAR_FUNCTION binding (IEA)	WBGene00009396	181625_s_at	0.30078	0.0033	2.8953	0.034898	22.825	0.288515	0.684706	3.96141	22408.3	W09C3.7	W09C3.7		WBGene00021114
192584_at	0.63068	0.0005	5.4127	0.0077991	18.76	0.521688	0.615106	1.921	10015.9	F45G2.3	F45G2.3	[GO:0004518] MOLECULAR_FUNCTION nuclease activity (IEA) | [GO:0006281] BIOLOGICAL_PROCESS DNA repair (IEA) | [GO:0003677] MOLECULAR_FUNCTION DNA binding (IEA) | [GO:0003824] MOLECULAR_FUNCTION catalytic activity (IEA) | [GO:0005634] CELLULAR_COMPONENT nucleus (IEA)	WBGene00009731	181635_at	0.48658	0	8.1693	0.00012804	8.762	0.542545	0.76444	19.693	1980.68	F55G11.2	F55G11.2		WBGene00010123
192639_s_at	0.47258	0.0075	3.4896	0.035322	18.067	0.438904	0.742412	2.32524	16611.8	F28D1.1	F28D1.1	[GO:0040010] BIOLOGICAL_PROCESS positive regulation of growth rate (IMP) | [GO:0009792] BIOLOGICAL_PROCESS embryonic development ending in birth or egg hatching (IMP)	WBGene00009211	181641_at	0.25824	0.0091	2.6817	0.046135	10.396	0.103595	0.33898	2.51007	22.8565	glb-10	C29F5.7	[GO:0005506] MOLECULAR_FUNCTION iron ion binding (IEA) | [GO:0015671] BIOLOGICAL_PROCESS oxygen transport (IEA) | [GO:0019825] MOLECULAR_FUNCTION oxygen binding (IEA) | [GO:0020037] MOLECULAR_FUNCTION heme binding (IEA)	WBGene00016215
192670_at	0.55457	0.0009	4.2191	0.019094	6.119	0.472317	0.67973	2.91659	1649.23	pph-1	C05A2.1	[GO:0016787] MOLECULAR_FUNCTION hydrolase activity (IEA)	WBGene00004083	181675_at	0.59409	0	9.5827	3.99e-05	18.835	0.52789	0.712938	2.96803	42.8724	R03G5.6	R03G5.6		WBGene00019847
192716_at	0.47701	0.0015	3.4945	0.035168	17.741	0.320638	0.593489	12.9065	585.118	C44C10.4	C44C10.4	[GO:0005524] MOLECULAR_FUNCTION ATP binding (IEA) | [GO:0005694] CELLULAR_COMPONENT chromosome (IEA)	WBGene00008085	181681_at	0.31212	0.0034	4.1166	0.0076804	3.229	0.26238	0.849809	83.5489	614.094	spp-13	F08F1.6	[GO:0016021] CELLULAR_COMPONENT integral to membrane (IEA)	WBGene00004998
192739_at	0.40055	0.0038	3.4485	0.036629	6.879	0.357426	0.697584	2.07263	1097.25	twk-5	B0334.2	[GO:0005267] MOLECULAR_FUNCTION potassium channel activity (IEA) | [GO:0006813] BIOLOGICAL_PROCESS potassium ion transport (IEA) | [GO:0016020] CELLULAR_COMPONENT membrane (IEA) | [GO:0016021] CELLULAR_COMPONENT integral to membrane (IEA)	WBGene00006660	181694_at	0.37859	0.0009	3.9042	0.0098907	9.32	0.253002	0.595535	3.22242	111787	F48D6.4	F48D6.4		WBGene00018602
192744_at	0.4172	0.018	4.9629	0.010771	16.861	0.485133	0.763538	2.7475	38002.3	C34B7.2	C34B7.2		WBGene00007912	181695_at	0.21369	0.0085	3.238	0.022495	21.241	0.136217	0.537102	12.4062	10539.4	C49G7.12	C49G7.12		WBGene00077593
192747_at	0.46027	0.0042	3.4483	0.036637	7.63	0.320432	0.546212	2.95463	96059	hex-1	T14F9.3	[GO:0004563] MOLECULAR_FUNCTION beta-N-acetylhexosaminidase activity (IEA) | [GO:0005975] BIOLOGICAL_PROCESS carbohydrate metabolic process (IEA) | [GO:0003824] MOLECULAR_FUNCTION catalytic activity (IEA) | [GO:0043169] MOLECULAR_FUNCTION cation binding (IEA)	WBGene00020509	181697_at	0.39403	0.0005	4.7755	0.0036012	15.601	0.176544	0.65529	107.258	803.389	fbxa-163	C08E3.6	[GO:0040010] BIOLOGICAL_PROCESS positive regulation of growth rate (IMP)	WBGene00015598
192771_at	0.39039	0.0098	4.5083	0.01519	20.975	0.460405	0.775013	1.94773	100934	npp-18	Y43F4B.4	[GO:0045132] BIOLOGICAL_PROCESS meiotic chromosome segregation (IMP)	WBGene00003804	181714_at	0.29286	0.0034	6.0043	0.00097248	14.458	0.341106	0.608904	5.72544	92005.3	T19B10.2	T19B10.2	[GO:0040011] BIOLOGICAL_PROCESS locomotion (IMP) | [GO:0040010] BIOLOGICAL_PROCESS positive regulation of growth rate (IMP) | [GO:0002009] BIOLOGICAL_PROCESS morphogenesis of an epithelium (IMP) | [GO:0018996] BIOLOGICAL_PROCESS molting cycle, collagen and cuticulin-based cuticle (IMP) | [GO:0002119] BIOLOGICAL_PROCESS nematode larval development (IMP) | [GO:0040007] BIOLOGICAL_PROCESS growth (IM…	WBGene00011831
192776_at	0.29364	0.0119	3.3359	0.04051	21.941	0.433863	0.657104	1.97827	45073.8	hda-1	C53A5.3	[GO:0045595] BIOLOGICAL_PROCESS regulation of cell differentiation (IGI) via [WBPaper00003050] Shi Y et al. (1998) | [GO:0009792] BIOLOGICAL_PROCESS embryonic development ending in birth or egg hatching (IMP) via [WBPaper00003050] Shi Y et al. (1998) | [GO:0040027] BIOLOGICAL_PROCESS negative regulation of vulval development (IGI) via [WBPaper00003329] Lu WX et al. (1998) | [GO:0040027] BIOLOGICA…	WBGene00001834	181715_s_at	0.30139	0.0019	5.192	0.0022774	13.814	0.267358	0.496829	7.00186	31020.6	T19B10.2	T19B10.2	[GO:0040011] BIOLOGICAL_PROCESS locomotion (IMP) | [GO:0040010] BIOLOGICAL_PROCESS positive regulation of growth rate (IMP) | [GO:0002009] BIOLOGICAL_PROCESS morphogenesis of an epithelium (IMP) | [GO:0018996] BIOLOGICAL_PROCESS molting cycle, collagen and cuticulin-based cuticle (IMP) | [GO:0002119] BIOLOGICAL_PROCESS nematode larval development (IMP) | [GO:0040007] BIOLOGICAL_PROCESS growth (IM…	WBGene00011831
192790_s_at	0.51712	0.003	3.7355	0.028522	16.698	0.392793	0.531244	8.4729	51893.7	F53F8.3	F53F8.3	[GO:0005515] MOLECULAR_FUNCTION protein binding (IEA) | [GO:0008270] MOLECULAR_FUNCTION zinc ion binding (IEA)	WBGene00010000	181717_at	0.3948	0.0003	5.3732	0.0018747	1.382	0.289031	0.780953	10.7566	180.678	Y54G9A.4	Y54G9A.4	[GO:0016020] CELLULAR_COMPONENT membrane (IEA) | [GO:0030001] BIOLOGICAL_PROCESS metal ion transport (IEA) | [GO:0046873] MOLECULAR_FUNCTION metal ion transmembrane transporter activity (IEA) | [GO:0016021] CELLULAR_COMPONENT integral to membrane (IEA)	WBGene00013207
192831_s_at	0.51466	0.0019	5.4351	0.0076779	6.677	0.508401	0.754308	2.7867	51137.7	lec-4	C44F1.3	[GO:0016936] MOLECULAR_FUNCTION galactoside binding (IDA) via [WBPaper00004274] Hirabayashi J et al. (2000) | [GO:0005529] MOLECULAR_FUNCTION sugar binding (IEA)	WBGene00002267	181742_s_at	0.28875	0.0057	3.8641	0.01038	19.175	0.266131	0.601569	3.42239	4916.25	ZC328.3	ZC328.3	[GO:0016021] CELLULAR_COMPONENT integral to membrane (IEA) | [GO:0009792] BIOLOGICAL_PROCESS embryonic development ending in birth or egg hatching (IMP)	WBGene00022593
192885_s_at	0.43318	0.0081	3.8226	0.026486	18.462	0.405668	0.591271	2.26072	9971.4	F53E4.1	F53E4.1	[GO:0000003] BIOLOGICAL_PROCESS reproduction (IMP)	WBGene00009978	181762_s_at	0.39697	0.0015	3.6898	0.012825	21.019	0.360774	0.769766	3.02763	15650	pisy-1	Y46G5A.5	[GO:0008654] BIOLOGICAL_PROCESS phospholipid biosynthetic process (IEA) | [GO:0016020] CELLULAR_COMPONENT membrane (IEA) | [GO:0016780] MOLECULAR_FUNCTION phosphotransferase activity, for other substituted phosphate groups (IEA) | [GO:0016021] CELLULAR_COMPONENT integral to membrane (IEA)	WBGene00012897
192914_at	0.30382	0.0032	3.4031	0.038142	8.562	0.404913	0.619825	2.41128	7238.19	dhp-1	R06C7.3	[GO:0006208] BIOLOGICAL_PROCESS pyrimidine base catabolic process (IDA) via [WBPaper00004552] Takemoto T et al. (2000) | [GO:0046113] BIOLOGICAL_PROCESS nucleobase catabolic process (ISS) via [WBPaper00004552] Takemoto T et al. (2000) | [GO:0005634] CELLULAR_COMPONENT nucleus (IDA) via [WBPaper00004552] Takemoto T et al. (2000) | [GO:0004157] MOLECULAR_FUNCTION dihydropyrimidinase activity (ISS) …	WBGene00000963	181782_at	0.31256	0.0051	3.8511	0.010543	7.81	0.243671	0.424329	2.42798	81.1253	F08F1.3	F08F1.3	[GO:0016021] CELLULAR_COMPONENT integral to membrane (IEA)	WBGene00017257
192942_s_at	0.46918	0.005	3.7734	0.027615	18.083	0.361313	0.559151	5.69458	33673.1	mig-32	F11A10.3	[GO:0005515] MOLECULAR_FUNCTION protein binding (IEA) | [GO:0008270] MOLECULAR_FUNCTION zinc ion binding (IEA) | [GO:0009792] BIOLOGICAL_PROCESS embryonic development ending in birth or egg hatching (IMP)	WBGene00008684	181789_at	0.35312	0.0015	2.9499	0.032515	11.022	0.0227579	0.13721	3.07803	2468.7	Y47H9C.8	Y47H9C.8		WBGene00012951
192954_at	0.53816	0.0012	3.8839	0.025153	16.687	0.360128	0.732161	6.99946	70603.6	sel-13	T04A8.10		WBGene00011411	181791_at	0.64884	0	13.9276	1.94e-06	6.028	0.655314	0.893657	6.15237	663.111	T06A1.5	T06A1.5	[GO:0016021] CELLULAR_COMPONENT integral to membrane (IEA) | [GO:0040018] BIOLOGICAL_PROCESS positive regulation of multicellular organism growth (IMP) | [GO:0040011] BIOLOGICAL_PROCESS locomotion (IMP)	WBGene00020280
192962_at	0.36375	0.0004	3.8821	0.02519	8.558	0.445857	0.596051	2.99059	2800.97	T11G6.3	T11G6.3	[GO:0005215] MOLECULAR_FUNCTION transporter activity (IEA) | [GO:0006810] BIOLOGICAL_PROCESS transport (IEA) | [GO:0016021] CELLULAR_COMPONENT integral to membrane (IEA)	WBGene00011718	181804_at	0.28357	0.0073	4.018	0.0086323	17.996	0.227055	0.445608	1.88056	35087.6	eif-3.J	Y40B1B.5	[GO:0040010] BIOLOGICAL_PROCESS positive regulation of growth rate (IMP) | [GO:0009792] BIOLOGICAL_PROCESS embryonic development ending in birth or egg hatching (IMP)	WBGene00012738
192965_at	0.58473	0.0013	6.402	0.0040448	16.013	0.607503	0.742304	1.63916	68601.8	rnp-3	K08D10.3	[GO:0003676] MOLECULAR_FUNCTION nucleic acid binding (IEA) | [GO:0000166] MOLECULAR_FUNCTION nucleotide binding (IEA) | [GO:0002119] BIOLOGICAL_PROCESS nematode larval development (IMP) | [GO:0040007] BIOLOGICAL_PROCESS growth (IMP)	WBGene00004386	181817_s_at	0.2682	0.0006	3.321	0.020257	9.806	0.123225	0.585555	3.26131	2556.71	C32E8.9	C32E8.9	[GO:0003824] MOLECULAR_FUNCTION catalytic activity (IEA) | [GO:0008152] BIOLOGICAL_PROCESS metabolic process (IEA)	WBGene00016325
192974_at	0.30829	0.0097	3.1421	0.048348	8.73	0.28904	0.376726	4.46513	111981	lbp-5	W02D3.7	[GO:0005215] MOLECULAR_FUNCTION transporter activity (IEA) | [GO:0006810] BIOLOGICAL_PROCESS transport (IEA) | [GO:0008289] MOLECULAR_FUNCTION lipid binding (IEA) | [GO:0005488] MOLECULAR_FUNCTION binding (IEA) | [GO:0040011] BIOLOGICAL_PROCESS locomotion (IMP)	WBGene00002257	181836_at	0.36152	0.0004	6.7918	0.00044792	12.2	0.385854	0.875898	5.61849	30.7479	bath-21	F59H6.8	[GO:0005515] MOLECULAR_FUNCTION protein binding (IEA)	WBGene00019138
192987_at	0.52158	0.0002	4.3267	0.01752	19.45	0.446634	0.695799	3.9256	105.01	clh-3	E04F6.11	[GO:0005886] CELLULAR_COMPONENT plasma membrane (IDA) via [WBPaper00006426] Denton J et al. (2004) | [GO:0005247] MOLECULAR_FUNCTION voltage-gated chloride channel activity (IEA) | [GO:0006821] BIOLOGICAL_PROCESS chloride transport (IEA) | [GO:0016020] CELLULAR_COMPONENT membrane (IEA) | [GO:0005216] MOLECULAR_FUNCTION ion channel activity (IEA) | [GO:0016021] CELLULAR_COMPONENT integral to membr…	WBGene00000530	181854_at	0.51951	0	9.9115	3.08e-05	7.48	0.612092	0.721842	4.25181	398.484	W07G9.2	W07G9.2	[GO:0015018] MOLECULAR_FUNCTION galactosylgalactosylxylosylprotein 3-beta-glucuronosyltransferase activity (IEA) | [GO:0016020] CELLULAR_COMPONENT membrane (IEA) | [GO:0016021] CELLULAR_COMPONENT integral to membrane (IEA)	WBGene00019546
192994_s_at	0.55672	0.0039	4.2838	0.01813	7.585	0.437189	0.52905	3.30947	8482.02	srp-5	C03G6.18	[GO:0004867] MOLECULAR_FUNCTION serine-type endopeptidase inhibitor activity (IEA)	WBGene00005646	181855_at	0.46762	0	5.3943	0.001833	16.001	0.337	0.661	8.39414	10668.5	F58A6.1	F58A6.1	[GO:0040010] BIOLOGICAL_PROCESS positive regulation of growth rate (IMP)	WBGene00019022
193010_at	0.45689	0.0067	3.1113	0.049749	20.258	0.242988	0.676209	5.56358	26.8283	C27C12.3	C27C12.3		WBGene00007773	181861_at	0.23894	0.0152	3.3879	0.018628	10.877	0.208297	0.646693	2.31973	254.838	F13A2.4	F13A2.4		WBGene00017413
193118_at	0.44994	0.0077	3.225	0.044803	5.227	0.367573	0.429796	2.88612	384.915	T19B10.5	T19B10.5	[GO:0005515] MOLECULAR_FUNCTION protein binding (IEA) | [GO:0016021] CELLULAR_COMPONENT integral to membrane (IEA)	WBGene00011833	181874_at	0.35282	0.0021	3.0946	0.026998	5.57	0.275279	0.729168	4.57427	152.487	W03F8.6	W03F8.6	[GO:0016021] CELLULAR_COMPONENT integral to membrane (IEA)	WBGene00020995
193131_at	0.55724	0.0006	7.361	0.0022729	7.669	0.626753	0.77013	2.80904	26327.9	ifa-1	F38B2.1	[GO:0005882] CELLULAR_COMPONENT intermediate filament (IDA) via [WBPaper00006137] Karabinos A et al. (2003) Journal of Molecular Biology "In vivo and in vitro evidence that the four essential intermediate filament (IF) | [GO:0005198] MOLECULAR_FUNCTION structural molecule activity (IEA) | [GO:0002119] BIOLOGICAL_PROCESS nematode larval development (IMP) | [GO:0040010] BIOLOGICAL_PROCESS positive …	WBGene00002050	181938_at	0.38866	0.0008	4.0875	0.0079489	17.938	0.414226	0.618857	5.27281	1122.76	npp-7	T19B4.2	[GO:0005622] CELLULAR_COMPONENT intracellular (IEA) | [GO:0008270] MOLECULAR_FUNCTION zinc ion binding (IEA) | [GO:0009792] BIOLOGICAL_PROCESS embryonic development ending in birth or egg hatching (IMP)	WBGene00003793
193165_at	0.42095	0.0101	6.1716	0.0046847	6.209	0.610256	0.791652	2.57018	317211	rhr-1	F08F3.3	[GO:0016020] CELLULAR_COMPONENT membrane (IEA) | [GO:0016021] CELLULAR_COMPONENT integral to membrane (IEA) | [GO:0009792] BIOLOGICAL_PROCESS embryonic development ending in birth or egg hatching (IMP)	WBGene00004358	181939_at	0.34109	0.0021	6.5686	0.00055537	22.498	0.510306	0.755687	3.8294	1254.99	F35C11.4	F35C11.4	[GO:0016021] CELLULAR_COMPONENT integral to membrane (IEA)	WBGene00009403
193188_s_at	0.37165	0.0193	3.2279	0.044684	5.013	0.35878	0.418341	1.80028	162387	vha-14	F55H2.2	[GO:0016469] CELLULAR_COMPONENT proton-transporting two-sector ATPase complex (IEA) | [GO:0042626] MOLECULAR_FUNCTION ATPase activity, coupled to transmembrane movement of substances (IEA) | [GO:0046961] MOLECULAR_FUNCTION hydrogen ion transporting ATPase activity, rotational mechanism (IEA) | [GO:0009792] BIOLOGICAL_PROCESS embryonic development ending in birth or egg hatching (IMP) | [GO:000211…	WBGene00010130	181946_at	0.48185	0	6.0563	0.0009226	2.416	0.416661	0.818779	49.5493	311.794	clec-10	C03H5.1	[GO:0005488] MOLECULAR_FUNCTION binding (IEA) | [GO:0005215] MOLECULAR_FUNCTION transporter activity (IEA) | [GO:0006810] BIOLOGICAL_PROCESS transport (IEA)	WBGene00015403
193221_s_at	0.37672	0.0158	3.44	0.036906	17.507	0.34344	0.548383	3.52642	23584.8	ocrl-1	C16C2.3	[GO:0005622] CELLULAR_COMPONENT intracellular (IEA) | [GO:0007165] BIOLOGICAL_PROCESS signal transduction (IEA) | [GO:0004437] MOLECULAR_FUNCTION inositol or phosphatidylinositol phosphatase activity (IEA)	WBGene00007620	181947_s_at	0.50889	0	5.657	0.0013899	3.475	0.31842	0.931038	24.8095	289.602	clec-10	C03H5.1	[GO:0005488] MOLECULAR_FUNCTION binding (IEA) | [GO:0005215] MOLECULAR_FUNCTION transporter activity (IEA) | [GO:0006810] BIOLOGICAL_PROCESS transport (IEA)	WBGene00015403
193306_at	0.44556	0.0039	4.3999	0.016534	17.687	0.466078	0.60639	7.86498	38901.8	F32E10.2	F32E10.2	[GO:0000785] CELLULAR_COMPONENT chromatin (IEA) | [GO:0003682] MOLECULAR_FUNCTION chromatin binding (IEA) | [GO:0005634] CELLULAR_COMPONENT nucleus (IEA) | [GO:0006333] BIOLOGICAL_PROCESS chromatin assembly or disassembly (IEA) | [GO:0009792] BIOLOGICAL_PROCESS embryonic development ending in birth or egg hatching (IMP)	WBGene00017990	181958_at	0.41014	0.0004	4.7953	0.0035226	14.062	0.302883	0.506802	4.70002	4690.65	T06D4.1	T06D4.1		WBGene00020290
193332_at	0.5433	0.0019	3.7716	0.027658	5.989	0.451831	0.719065	2.69638	209.659	Y18D10A.8	Y18D10A.8	[GO:0003723] MOLECULAR_FUNCTION RNA binding (IEA) | [GO:0005515] MOLECULAR_FUNCTION protein binding (IEA) | [GO:0016070] BIOLOGICAL_PROCESS RNA metabolic process (IEA)	WBGene00012478	181966_s_at	0.46664	0.0006	5.5713	0.0015203	14.262	0.310092	0.540688	4.12327	783	K02F6.7	K02F6.7		WBGene00019341
193443_s_at	0.28392	0.0145	3.9357	0.024084	18.219	0.497124	0.914311	2.62428	75473.1	T09A5.8	T09A5.8	[GO:0000785] CELLULAR_COMPONENT chromatin (IEA) | [GO:0003682] MOLECULAR_FUNCTION chromatin binding (IEA) | [GO:0005634] CELLULAR_COMPONENT nucleus (IEA) | [GO:0006333] BIOLOGICAL_PROCESS chromatin assembly or disassembly (IEA) | [GO:0003677] MOLECULAR_FUNCTION DNA binding (IEA) | [GO:0006306] BIOLOGICAL_PROCESS DNA methylation (IEA) | [GO:0009792] BIOLOGICAL_PROCESS embryonic development ending …	WBGene00011636	181979_at	0.22944	0.0176	3.3499	0.019536	12.938	0.373266	0.538429	3.10448	33519.3	C47D12.2	C47D12.2	[GO:0040027] BIOLOGICAL_PROCESS negative regulation of vulval development (IMP) | [GO:0000003] BIOLOGICAL_PROCESS reproduction (IMP) | [GO:0009792] BIOLOGICAL_PROCESS embryonic development ending in birth or egg hatching (IMP) | [GO:0002119] BIOLOGICAL_PROCESS nematode larval development (IMP)	WBGene00008136
193451_at	0.50654	0.0042	4.7819	0.012324	19.346	0.502795	0.567316	4.01849	277.24	asna-2	F47G3.2		WBGene00018577	181992_s_at	0.57039	0	8.1662	0.00012838	19.557	0.588768	0.770033	9.42597	314.424	daf-16	R13H8.1	[GO:0040024] BIOLOGICAL_PROCESS dauer larval development (IGI) via [WBPaper00004702] Lin K et al. (2001) | [GO:0008340] BIOLOGICAL_PROCESS determination of adult life span (IGI) via [WBPaper00004702] Lin K et al. (2001) | [GO:0008340] BIOLOGICAL_PROCESS determination of adult life span (IMP) via [WBPaper00004702] Lin K et al. (2001) | [GO:0009408] BIOLOGICAL_PROCESS response to heat (IEP) via [WB…	WBGene00000912
193483_at	0.64231	0.0003	5.4611	0.0075403	7.673	0.58159	0.773815	3.19317	70.1063	nhr-43	C29E6.5	[GO:0003700] MOLECULAR_FUNCTION transcription factor activity (IEA) | [GO:0003707] MOLECULAR_FUNCTION steroid hormone receptor activity (IEA) | [GO:0005634] CELLULAR_COMPONENT nucleus (IEA) | [GO:0006355] BIOLOGICAL_PROCESS regulation of transcription, DNA-dependent (IEA) | [GO:0008270] MOLECULAR_FUNCTION zinc ion binding (IEA) | [GO:0043565] MOLECULAR_FUNCTION sequence-specific DNA binding (IEA)	WBGene00003633	182003_at	0.41441	0.0001	6.0864	0.00089499	21.528	0.348198	0.521012	8.1699	3109.29	C42D8.1	C42D8.1	[GO:0016021] CELLULAR_COMPONENT integral to membrane (IEA)	WBGene00016599
193499_s_at	0.32115	0.0053	4.0432	0.022033	16.869	0.461252	0.765908	4.71899	1748.71	ZC504.3	ZC504.3	[GO:0004672] MOLECULAR_FUNCTION protein kinase activity (IEA) | [GO:0005524] MOLECULAR_FUNCTION ATP binding (IEA) | [GO:0006468] BIOLOGICAL_PROCESS protein amino acid phosphorylation (IEA) | [GO:0004713] MOLECULAR_FUNCTION protein tyrosine kinase activity (IEA) | [GO:0004674] MOLECULAR_FUNCTION protein serine/threonine kinase activity (IEA)	WBGene00013917	182007_at	0.28737	0.0078	4.0271	0.0085399	17.544	0.169384	0.633521	21.2803	691.305	K12H6.7	K12H6.7		WBGene00019687
193551_s_at	0.30566	0.0045	4.2954	0.017962	20.657	0.360546	0.713969	2.84362	292.759	C34F6.9	C34F6.9	[GO:0004221] MOLECULAR_FUNCTION ubiquitin thiolesterase activity (IEA) | [GO:0006511] BIOLOGICAL_PROCESS ubiquitin-dependent protein catabolic process (IEA)	WBGene00007943	182015_at	0.60995	0	7.5706	0.00021734	22.571	0.477655	0.635872	3.68852	3400.25	C26D10.6	C26D10.6		WBGene00007746
193647_s_at	0.43124	0.0148	3.7534	0.02809	8.097	0.407244	0.626064	1.96749	2463.27	gpb-2	F52A8.2	[GO:0008277] BIOLOGICAL_PROCESS regulation of G-protein coupled receptor protein signaling pathway (IGI) via [WBPaper00002466] Brundage LA et al. (1996) Neuron "Mutations in a C. elegans G(Q) | [GO:0046662] BIOLOGICAL_PROCESS regulation of oviposition (IMP) via [WBPaper00004406] Robatzek M et al. (2000) | [GO:0040012] BIOLOGICAL_PROCESS regulation of locomotion (IMP) via [WBPaper00004406] Robatze…	WBGene00001680	182019_at	0.24487	0.013	2.9306	0.033339	4.361	0.231259	0.585859	5.78788	18.1062	W03D2.9	W03D2.9		WBGene00020983
193651_s_at	0.50468	0.002	3.3518	0.039934	7.256	0.423818	0.596108	1.54092	1.88734e+06	far-1	F02A9.2	[GO:0008289] MOLECULAR_FUNCTION lipid binding (IEA) | [GO:0010171] BIOLOGICAL_PROCESS body morphogenesis (IMP)	WBGene00001385	182074_at	0.55876	0	7.8428	0.0001704	21.926	0.606169	0.697912	4.68546	602.387	ndx-2	W02G9.1	[GO:0016787] MOLECULAR_FUNCTION hydrolase activity (IEA)	WBGene00003579
193799_at	0.37635	0.0139	3.9928	0.022968	8.741	0.409444	0.46469	2.02689	87.895	clec-264	F31D4.4	[GO:0005488] MOLECULAR_FUNCTION binding (IEA)	WBGene00009291	182079_at	0.25481	0.0116	3.4317	0.017636	12.626	0.15095	0.640028	2.41225	18715.7	Y87G2A.7	Y87G2A.7		WBGene00013596
193825_at	0.48037	0.0016	3.2628	0.043284	10.047	0.303678	0.5047	5.05249	314.604	nlp-1	C01C4.1	[GO:0016021] CELLULAR_COMPONENT integral to membrane (IEA)	WBGene00003739	182091_s_at	0.35849	0.0004	4.1006	0.0078273	7.251	0.284314	0.530428	4.45396	2465.82	T04A11.1	T04A11.1	[GO:0003824] MOLECULAR_FUNCTION catalytic activity (IEA) | [GO:0009058] BIOLOGICAL_PROCESS biosynthetic process (IEA)	WBGene00011416
193827_s_at	0.44866	0.0085	6.617	0.0035378	18.54	0.591866	0.704891	2.33834	14742.3	H35B03.2	H35B03.2	[GO:0004540] MOLECULAR_FUNCTION ribonuclease activity (IEA) | [GO:0008033] BIOLOGICAL_PROCESS tRNA processing (IEA) | [GO:0040010] BIOLOGICAL_PROCESS positive regulation of growth rate (IMP) | [GO:0002119] BIOLOGICAL_PROCESS nematode larval development (IMP) | [GO:0040007] BIOLOGICAL_PROCESS growth (IMP) | [GO:0000003] BIOLOGICAL_PROCESS reproduction (IMP)	WBGene00019264	182117_at	0.3405	0.0023	3.3546	0.01942	10.255	0.192417	0.29547	3.50334	6538.21	R05G6.4	R05G6.4		WBGene00019898
193839_s_at	0.485	0.0083	4.8519	0.011695	20.663	0.492399	0.934592	2.87864	1320.74	Y106G6D.7	Y106G6D.7	[GO:0003676] MOLECULAR_FUNCTION nucleic acid binding (IEA) | [GO:0000166] MOLECULAR_FUNCTION nucleotide binding (IEA)	WBGene00013703	182120_at	0.41165	0.0001	4.4478	0.0052221	19.143	0.353929	0.605258	2.60889	5427.75	Y87G2A.2	Y87G2A.2	[GO:0006637] BIOLOGICAL_PROCESS acyl-CoA metabolic process (IEA) | [GO:0016291] MOLECULAR_FUNCTION acyl-CoA thioesterase activity (IEA)	WBGene00013594
193842_at	0.58932	0.0027	4.4355	0.016079	16.619	0.416689	0.593652	1.78891	5119.98	Y37D8A.18	Y37D8A.18	[GO:0003735] MOLECULAR_FUNCTION structural constituent of ribosome (IEA) | [GO:0005622] CELLULAR_COMPONENT intracellular (IEA) | [GO:0005840] CELLULAR_COMPONENT ribosome (IEA) | [GO:0006412] BIOLOGICAL_PROCESS translation (IEA) | [GO:0040010] BIOLOGICAL_PROCESS positive regulation of growth rate (IMP) | [GO:0009792] BIOLOGICAL_PROCESS embryonic development ending in birth or egg hatching (IMP) | …	WBGene00012556	182125_at	0.36476	0.0004	4.5291	0.0047578	4.066	0.179164	0.687732	6.43171	64.583	tag-324	C27C12.5	[GO:0005272] MOLECULAR_FUNCTION sodium channel activity (IEA) | [GO:0006814] BIOLOGICAL_PROCESS sodium ion transport (IEA) | [GO:0016020] CELLULAR_COMPONENT membrane (IEA) | [GO:0016021] CELLULAR_COMPONENT integral to membrane (IEA)	WBGene00007775
193862_s_at	0.50418	0.004	3.489	0.03534	4.503	0.389345	0.42006	3.4193	1493.03	F11D5.1	F11D5.1		WBGene00017380	182166_at	0.2845	0.0055	3.2991	0.020824	23.492	0.363586	0.767523	1.89387	10522.6	C44C1.1	C44C1.1	[GO:0016021] CELLULAR_COMPONENT integral to membrane (IEA) | [GO:0040010] BIOLOGICAL_PROCESS positive regulation of growth rate (IMP) | [GO:0002119] BIOLOGICAL_PROCESS nematode larval development (IMP) | [GO:0040011] BIOLOGICAL_PROCESS locomotion (IMP) | [GO:0040018] BIOLOGICAL_PROCESS positive regulation of multicellular organism growth (IMP)	WBGene00016641
193879_s_at	0.54958	0.0021	7.4523	0.0021574	20.735	0.671884	0.827982	2.8927	1638.07	gei-12	F52D2.4	[GO:0009792] BIOLOGICAL_PROCESS embryonic development ending in birth or egg hatching (IMP) via [WBPaper00005194] Tsuboi D et al. (2002) | [GO:0005623] CELLULAR_COMPONENT cell (IDA) via [WBPaper00005194] Tsuboi D et al. (2002) | [GO:0005515] MOLECULAR_FUNCTION protein binding (IDA) via [WBPaper00005194] Tsuboi D et al. (2002)	WBGene00001569	182180_at	0.46947	0	4.7942	0.0035269	18.753	0.336337	0.940924	88.9511	270.516	C50D2.6	C50D2.6		WBGene00016809
193886_at	0.48215	0.0035	3.7842	0.027361	17.545	0.382471	0.516737	2.0325	706774	cks-1	C09G4.3	[GO:0007049] BIOLOGICAL_PROCESS cell cycle (IEA) | [GO:0016538] MOLECULAR_FUNCTION cyclin-dependent protein kinase regulator activity (IEA) | [GO:0009792] BIOLOGICAL_PROCESS embryonic development ending in birth or egg hatching (IMP)	WBGene00001051	182182_at	0.3771	0.0014	4.4341	0.0053051	10.362	0.354062	0.719887	2.99545	2389.85	T28F2.2	T28F2.2	[GO:0040010] BIOLOGICAL_PROCESS positive regulation of growth rate (IMP)	WBGene00020901
193891_at	0.51042	0.0019	4.2554	0.018545	5.683	0.461315	0.599709	2.01658	114671	aco-1	ZK455.1	[GO:0006879] BIOLOGICAL_PROCESS cellular iron ion homeostasis (ISS) via [WBPaper00005703] Gourley BL et al. (2003) | [GO:0005829] CELLULAR_COMPONENT cytosol (IDA) via [WBPaper00005703] Gourley BL et al. (2003) | [GO:0003994] MOLECULAR_FUNCTION aconitate hydratase activity (IDA) via [WBPaper00005703] Gourley BL et al. (2003) | [GO:0008152] BIOLOGICAL_PROCESS metabolic process (IEA) | [GO:0051539] …	WBGene00000040	182187_s_at	0.36112	0.0001	3.3929	0.018511	17.715	0.14937	0.429908	2.64341	94.9268	F29G9.1	F29G9.1		WBGene00017930
193893_at	0.43313	0.0029	3.2029	0.045717	9.32	0.33162	0.504281	2.82671	9609.57	ZK909.3	ZK909.3	[GO:0003824] MOLECULAR_FUNCTION catalytic activity (IEA)	WBGene00014148	182189_at	0.20008	0.0186	2.6454	0.048393	13.193	0.085892	0.665759	13.9254	83.7738	fbxb-49	K05F6.1		WBGene00019412
193907_at	0.45169	0.0046	6.3007	0.0043127	20.545	0.54481	0.690756	2.21355	13415.1	hmp-2	K05C4.6	[GO:0009790] BIOLOGICAL_PROCESS embryonic development (IMP) via [WBPaper00003046] Costa M et al. (1998) | [GO:0016477] BIOLOGICAL_PROCESS cell migration (IMP) via [WBPaper00003046] Costa M et al. (1998) | [GO:0007016] BIOLOGICAL_PROCESS cytoskeletal anchoring at plasma membrane (IMP) via [WBPaper00003046] Costa M et al. (1998) | [GO:0045944] BIOLOGICAL_PROCESS positive regulation of transcription…	WBGene00001979	182192_s_at	0.27689	0.0067	3.2682	0.021653	20.667	0.332442	0.503659	3.80658	510.876	C24A1.3	C24A1.3	[GO:0004672] MOLECULAR_FUNCTION protein kinase activity (IEA) | [GO:0005524] MOLECULAR_FUNCTION ATP binding (IEA) | [GO:0006468] BIOLOGICAL_PROCESS protein amino acid phosphorylation (IEA) | [GO:0004713] MOLECULAR_FUNCTION protein tyrosine kinase activity (IEA) | [GO:0004674] MOLECULAR_FUNCTION protein serine/threonine kinase activity (IEA)	WBGene00016030
193927_s_at	0.44336	0.0071	5.8945	0.0056161	8.501	0.578196	0.684747	3.25324	16024.4	Y48A6B.7	Y48A6B.7	[GO:0008270] MOLECULAR_FUNCTION zinc ion binding (IEA) | [GO:0016787] MOLECULAR_FUNCTION hydrolase activity (IEA)	WBGene00012968	182195_at	0.31123	0	4.3277	0.0059993	13.672	0.320488	0.904359	1.86969	10.534	fbxa-166	C08E3.9		WBGene00015601
193937_s_at	0.51271	0.0009	5.4849	0.0074163	5.581	0.506322	0.726688	2.35211	2942.52	let-268	F52H3.1	[GO:0005783] CELLULAR_COMPONENT endoplasmic reticulum (IEA) | [GO:0008475] MOLECULAR_FUNCTION procollagen-lysine 5-dioxygenase activity (IEA) | [GO:0005506] MOLECULAR_FUNCTION iron ion binding (IEA) | [GO:0016706] MOLECULAR_FUNCTION oxidoreductase activity, acting on paired donors, with incorporation or reduction of molecular oxygen, 2-oxoglutarate as one donor, and incorporation of one atom each…	WBGene00002497	182206_s_at	0.33981	0.0032	3.0386	0.029008	20.746	0.180779	0.56638	2.87314	505.563	F55A4.8	F55A4.8	[GO:0005215] MOLECULAR_FUNCTION transporter activity (IEA) | [GO:0006810] BIOLOGICAL_PROCESS transport (IEA) | [GO:0016021] CELLULAR_COMPONENT integral to membrane (IEA)	WBGene00018860
193941_at	0.51294	0.0043	4.7312	0.012804	18.276	0.507206	0.699062	2.34834	67390.3	Y39A1A.12	Y39A1A.12	[GO:0000166] MOLECULAR_FUNCTION nucleotide binding (IEA) | [GO:0017111] MOLECULAR_FUNCTION nucleoside-triphosphatase activity (IEA) | [GO:0005524] MOLECULAR_FUNCTION ATP binding (IEA) | [GO:0009792] BIOLOGICAL_PROCESS embryonic development ending in birth or egg hatching (IMP) | [GO:0000003] BIOLOGICAL_PROCESS reproduction (IMP) | [GO:0040035] BIOLOGICAL_PROCESS hermaphrodite genitalia developmen…	WBGene00012650	182218_s_at	0.273	0.0045	3.9615	0.0092351	22.979	0.202467	0.467817	1.98345	7669.74	W07E6.2	W07E6.2	[GO:0040010] BIOLOGICAL_PROCESS positive regulation of growth rate (IMP) | [GO:0002119] BIOLOGICAL_PROCESS nematode larval development (IMP) | [GO:0040007] BIOLOGICAL_PROCESS growth (IMP)	WBGene00021074
194008_s_at	0.41402	0.0067	4.1238	0.020626	20.067	0.445159	0.609043	2.07221	4770.85	drr-2	T12D8.2	[GO:0003676] MOLECULAR_FUNCTION nucleic acid binding (IEA) | [GO:0000166] MOLECULAR_FUNCTION nucleotide binding (IEA)	WBGene00011730	182227_s_at	0.19381	0.0151	2.7904	0.040005	5.311	0.0123771	0.353774	3.22895	86.6203	vab-8	K12F2.2	[GO:0016477] BIOLOGICAL_PROCESS cell migration (IMP) via [WBPaper00002403] Wightman BC et al. (1996) | [GO:0007411] BIOLOGICAL_PROCESS axon guidance (IMP) via [WBPaper00002403] Wightman BC et al. (1996) | [GO:0030334] BIOLOGICAL_PROCESS regulation of cell migration (IMP) via [WBPaper00001304] Manser J et al. (1990) | [GO:0008078] BIOLOGICAL_PROCESS mesodermal cell migration (IMP) via [WBPaper0000…	WBGene00006874
194023_s_at	0.41088	0.0133	3.3617	0.039582	6.586	0.319079	0.715015	6.18427	1624.71	ugt-50	T07C5.1	[GO:0008152] BIOLOGICAL_PROCESS metabolic process (IEA) | [GO:0016758] MOLECULAR_FUNCTION transferase activity, transferring hexosyl groups (IEA) | [GO:0016021] CELLULAR_COMPONENT integral to membrane (IEA)	WBGene00011564	182243_at	0.28944	0.0129	2.9924	0.030783	19.33	0.208892	0.762151	3.79387	900.433	F55A3.1	F55A3.1	[GO:0035264] BIOLOGICAL_PROCESS multicellular organism growth (IGI) via [WBPaper00030999] Sasagawa Y et al. (2007) | [GO:0008270] MOLECULAR_FUNCTION zinc ion binding (IEA) | [GO:0016021] CELLULAR_COMPONENT integral to membrane (IEA)	WBGene00018847
194068_s_at	0.50485	0.0038	3.1414	0.048382	8.621	0.340841	0.55264	1.9293	738.313	T23G11.6	T23G11.6	[GO:0016021] CELLULAR_COMPONENT integral to membrane (IEA) | [GO:0002119] BIOLOGICAL_PROCESS nematode larval development (IMP) | [GO:0018996] BIOLOGICAL_PROCESS molting cycle, collagen and cuticulin-based cuticle (IMP) | [GO:0009792] BIOLOGICAL_PROCESS embryonic development ending in birth or egg hatching (IMP) | [GO:0040007] BIOLOGICAL_PROCESS growth (IMP) | [GO:0040011] BIOLOGICAL_PROCESS locom…	WBGene00011971	182260_at	0.37647	0.0016	3.691	0.012806	11.157	0.20259	0.549398	2.75387	17759.4	C01F1.2	C01F1.2	[GO:0005215] MOLECULAR_FUNCTION transporter activity (IEA) | [GO:0005488] MOLECULAR_FUNCTION binding (IEA) | [GO:0006810] BIOLOGICAL_PROCESS transport (IEA) | [GO:0016021] CELLULAR_COMPONENT integral to membrane (IEA) | [GO:0009792] BIOLOGICAL_PROCESS embryonic development ending in birth or egg hatching (IMP) | [GO:0002119] BIOLOGICAL_PROCESS nematode larval development (IMP) | [GO:0040007] BIOL…	WBGene00015297
194091_s_at	0.48834	0.0053	6.2612	0.0044229	18.667	0.571036	0.933363	1.5412	3928.63	cua-1	Y76A2A.2	[GO:0006825] BIOLOGICAL_PROCESS copper ion transport (IDA) via [WBPaper00002804] Sambongi Y et al. (1997) | [GO:0006825] BIOLOGICAL_PROCESS copper ion transport (IEA) | [GO:0005774] CELLULAR_COMPONENT vacuolar membrane (IDA) via [WBPaper00002804] Sambongi Y et al. (1997) | [GO:0005375] MOLECULAR_FUNCTION copper ion transmembrane transporter activity (IDA) via [WBPaper00002804] Sambongi Y et al. (…	WBGene00000834	182261_at	0.30609	0.0009	3.1747	0.024375	7.687	0.219875	0.501567	3.72436	11954.6	C23H3.2	C23H3.2	[GO:0016021] CELLULAR_COMPONENT integral to membrane (IEA)	WBGene00016018
194140_at	0.42545	0.0101	4.0306	0.022263	5.669	0.43678	0.562473	3.66501	487.035	plc-2	Y75B12B.6	[GO:0004629] MOLECULAR_FUNCTION phospholipase C activity (IEA) | [GO:0006629] BIOLOGICAL_PROCESS lipid metabolic process (IEA) | [GO:0007242] BIOLOGICAL_PROCESS intracellular signaling cascade (IEA) | [GO:0004435] MOLECULAR_FUNCTION phosphoinositide phospholipase C activity (IEA) | [GO:0007165] BIOLOGICAL_PROCESS signal transduction (IEA) | [GO:0008081] MOLECULAR_FUNCTION phosphoric diester hydro…	WBGene00004037	182276_at	0.29471	0.0058	2.6322	0.049242	21.747	0.241287	0.588471	11.0166	2452.97	T10B10.4	T10B10.4		WBGene00011681
194168_s_at	0.45205	0.0043	4.4866	0.01545	18.26	0.442147	0.662705	4.82158	1686.78	F56G4.4	F56G4.4	[GO:0003676] MOLECULAR_FUNCTION nucleic acid binding (IEA) | [GO:0008270] MOLECULAR_FUNCTION zinc ion binding (IEA) | [GO:0040018] BIOLOGICAL_PROCESS positive regulation of multicellular organism growth (IMP) | [GO:0000003] BIOLOGICAL_PROCESS reproduction (IMP) | [GO:0040011] BIOLOGICAL_PROCESS locomotion (IMP) | [GO:0040035] BIOLOGICAL_PROCESS hermaphrodite genitalia development (IMP) | [GO:0002…	WBGene00010159	182280_at	0.25821	0.0142	2.668	0.046972	23.344	0.197191	0.555737	9.25429	327.071	F13C5.5	F13C5.5	[GO:0016021] CELLULAR_COMPONENT integral to membrane (IEA)	WBGene00017426
194170_s_at	0.46803	0.0008	4.8686	0.01155	6.558	0.526492	0.791895	3.7036	83555.7	F07A5.7	F07A5.7			182283_at	0.4027	0	6.128	0.00085826	20.175	0.395842	0.732436	2.95283	48.3189	F18E9.3	F18E9.3		WBGene00017569
194172_s_at	0.51961	0.0045	5.7423	0.0062184	17.814	0.516539	0.760978	2.95012	455.668	Y65B4A.1	Y65B4A.1	[GO:0003676] MOLECULAR_FUNCTION nucleic acid binding (IEA) | [GO:0000166] MOLECULAR_FUNCTION nucleotide binding (IEA) | [GO:0010171] BIOLOGICAL_PROCESS body morphogenesis (IMP) | [GO:0040011] BIOLOGICAL_PROCESS locomotion (IMP)	WBGene00022025	182294_at	0.59469	0	8.1621	0.00012884	18.541	0.430964	0.957549	3.3644	2511.98	Y60A3A.8	Y60A3A.8		WBGene00013359
194177_x_at	0.48602	0.0008	3.66	0.030436	6.331	0.472545	0.697357	1.7368	1.7093e+06	gpd-2	K10B3.8	[GO:0004365] MOLECULAR_FUNCTION glyceraldehyde-3-phosphate dehydrogenase (phosphorylating) activity (IEA) | [GO:0006006] BIOLOGICAL_PROCESS glucose metabolic process (IEA) | [GO:0051287] MOLECULAR_FUNCTION NAD binding (IEA) | [GO:0008943] MOLECULAR_FUNCTION glyceraldehyde-3-phosphate dehydrogenase activity (IEA) | [GO:0003824] MOLECULAR_FUNCTION catalytic activity (IEA) | [GO:0005488] MOLECULAR_F…	WBGene00001684	182303_at	0.30524	0.002	3.3193	0.020301	23.424	0.104993	0.539547	2.47668	765.474	F28H1.4	F28H1.4	[GO:0016020] CELLULAR_COMPONENT membrane (IEA) | [GO:0016021] CELLULAR_COMPONENT integral to membrane (IEA)	WBGene00017909
194188_x_at	0.47937	0.0049	5.563	0.0070265	6.893	0.545892	0.572413	2.43173	332.62	mps-2	K01A2.8			182318_s_at	0.50105	0	6.3857	0.00066416	14.522	0.37974	0.897774	3.03825	2849.85	C36C9.1	C36C9.1		WBGene00016485
194212_x_at	0.54338	0.0021	3.5385	0.033833	6.075	0.358474	0.481843	2.34035	545106	F37C4.5	F37C4.5		WBGene00018145	182323_at	0.33815	0.0034	4.1399	0.0074722	5.595	0.143925	0.686236	5.15237	2415.82	fbxa-105	C02H6.2		WBGene00015362
194226_x_at	0.46544	0.004	5.7012	0.0063939	7.451	0.550382	0.726242	2.57114	1101.87	mps-2	K01A2.8	[GO:0043266] BIOLOGICAL_PROCESS regulation of potassium ion transport (IDA) via [WBPaper00025063] Park KH et al. (2005) | [GO:0050920] BIOLOGICAL_PROCESS regulation of chemotaxis (IMP) via [WBPaper00025063] Park KH et al. (2005) | [GO:0015459] MOLECULAR_FUNCTION potassium channel regulator activity (IDA) via [WBPaper00025063] Park KH et al. (2005) | [GO:0016021] CELLULAR_COMPONENT integral to mem…	WBGene00019282	182330_s_at	0.31179	0.0047	3.2781	0.021382	3.129	0.0538081	0.513738	4.3458	2045.56	Y37A1A.2	Y37A1A.2	[GO:0016021] CELLULAR_COMPONENT integral to membrane (IEA)	WBGene00012535
194249_x_at	0.37172	0.0159	4.4512	0.015882	7.281	0.41493	0.622021	2.66866	3260.3	mps-2	K01A2.8	[GO:0043266] BIOLOGICAL_PROCESS regulation of potassium ion transport (IDA) via [WBPaper00025063] Park KH et al. (2005) | [GO:0050920] BIOLOGICAL_PROCESS regulation of chemotaxis (IMP) via [WBPaper00025063] Park KH et al. (2005) | [GO:0015459] MOLECULAR_FUNCTION potassium channel regulator activity (IDA) via [WBPaper00025063] Park KH et al. (2005) | [GO:0016021] CELLULAR_COMPONENT integral to mem…	WBGene00019282	182338_at	0.76246	0	16.8178	3.69e-07	5.937	0.700562	0.876776	93.0016	2844.34	T05E7.1	T05E7.1	[GO:0006629] BIOLOGICAL_PROCESS lipid metabolic process (IEA) | [GO:0016290] MOLECULAR_FUNCTION palmitoyl-CoA hydrolase activity (IEA) | [GO:0006637] BIOLOGICAL_PROCESS acyl-CoA metabolic process (IEA) | [GO:0016790] MOLECULAR_FUNCTION thiolester hydrolase activity (IEA)	WBGene00020258
194257_x_at	0.51166	0.002	4.4722	0.015623	6.351	0.507741	0.676284	3.65839	247131	lev-11	Y105E8B.1	[GO:0030833] BIOLOGICAL_PROCESS regulation of actin filament polymerization (IDA) via [WBPaper00005168] Ono S et al. (2002) | [GO:0043393] BIOLOGICAL_PROCESS regulation of protein binding (IDA) via [WBPaper00005168] Ono S et al. (2002) | [GO:0005865] CELLULAR_COMPONENT striated muscle thin filament (IDA) via [WBPaper00005168] Ono S et al. (2002) | [GO:0051015] MOLECULAR_FUNCTION actin filament bi…	WBGene00002978	182357_at	0.39229	0.0001	3.7612	0.011756	22.609	0.296198	0.555424	14.5274	16590.1	nlp-26	Y43F8C.2		WBGene00003764
														182399_s_at	0.27318	0.0059	6.6061	0.00053549	15.317	0.360991	0.520374	3.2963	1594.91	---	---
														182401_at	0.46845	0	6.696	0.000491	8.822	0.474673	0.74251	4.81935	67.8965	K02H8.1	K02H8.1	[GO:0003676] MOLECULAR_FUNCTION nucleic acid binding (IEA) | [GO:0008270] MOLECULAR_FUNCTION zinc ion binding (IEA)	WBGene00019347
														182428_s_at	0.34375	0.0014	5.2572	0.0021227	10.073	0.532431	0.655917	24.0638	574.435	lys-3	Y22F5A.6	[GO:0003824] MOLECULAR_FUNCTION catalytic activity (IEA) | [GO:0005975] BIOLOGICAL_PROCESS carbohydrate metabolic process (IEA) | [GO:0043169] MOLECULAR_FUNCTION cation binding (IEA)	WBGene00003092
														182444_at	0.27974	0.0096	4.7113	0.00387	14.038	0.165845	0.641661	6.42982	4245.58	F18G5.6	F18G5.6		WBGene00017582
														182447_at	0.37966	0.0011	7.0434	0.000353	17.122	0.495093	0.768048	4.20008	2552.2	T10B10.3	T10B10.3		WBGene00011680
														182451_at	0.36967	0.0022	2.9777	0.031371	7.963	0.111794	0.641022	2.97622	89.1202	K04G11.3	K04G11.3		WBGene00010571
														182471_at	0.39413	0.0007	5.6391	0.0014161	10.235	0.412578	0.687961	2.61045	7675.17	tag-299	F20D1.10	[GO:0016021] CELLULAR_COMPONENT integral to membrane (IEA)	WBGene00008980
														182476_at	0.25952	0.015	3.6885	0.012845	16.833	0.386532	0.511597	6.53577	11001.7	pup-2	K10D2.2	[GO:0040010] BIOLOGICAL_PROCESS positive regulation of growth rate (IMP)	WBGene00019628
														182477_s_at	0.23137	0.0157	3.6037	0.014253	17.481	0.350353	0.535433	6.48929	4891.28	pup-2	K10D2.2	[GO:0040010] BIOLOGICAL_PROCESS positive regulation of growth rate (IMP)	WBGene00019628
														182492_at	0.39002	0.0007	4.1299	0.0075611	22.002	0.255037	0.544645	7.60053	362.167	math-14	C16C4.4		WBGene00015828
														182497_at	0.28587	0.0113	4.8508	0.003311	18.315	0.242412	0.539747	7.45512	1298.5	F28B3.1	F28B3.1	[GO:0004869] MOLECULAR_FUNCTION cysteine protease inhibitor activity (IEA) | [GO:0009792] BIOLOGICAL_PROCESS embryonic development ending in birth or egg hatching (IMP)	WBGene00017882
														182498_at	0.61301	0	12.909	3.7e-06	7.49	0.526799	0.923761	86.8984	244.213	H25K10.1	H25K10.1	[GO:0016787] MOLECULAR_FUNCTION hydrolase activity (IEA) | [GO:0003993] MOLECULAR_FUNCTION acid phosphatase activity (IEA) | [GO:0046872] MOLECULAR_FUNCTION metal ion binding (IEA)	WBGene00010411
														182532_at	0.31228	0.0057	5.1124	0.002483	22.214	0.343008	0.682619	2.36782	12335	H12D21.5	H12D21.5	[GO:0016021] CELLULAR_COMPONENT integral to membrane (IEA)	WBGene00010381
														182556_at	0.2999	0.0022	3.6603	0.013295	6.133	0.158305	0.525269	6.73051	550.677	F41C6.4	F41C6.4		WBGene00018278
														182561_at	0.22674	0.0161	2.9183	0.033873	3.024	0.0879923	0.534998	44.813	172.835	Y11D7A.9	Y11D7A.9	[GO:0016021] CELLULAR_COMPONENT integral to membrane (IEA) | [GO:0018991] BIOLOGICAL_PROCESS oviposition (IMP) | [GO:0040011] BIOLOGICAL_PROCESS locomotion (IMP) | [GO:0040010] BIOLOGICAL_PROCESS positive regulation of growth rate (IMP) | [GO:0002119] BIOLOGICAL_PROCESS nematode larval development (IMP) | [GO:0010171] BIOLOGICAL_PROCESS body morphogenesis (IMP) | [GO:0040007] BIOLOGICAL_PROCESS g…	WBGene00012433
														182578_at	0.38787	0.0003	4.0006	0.0088133	8.246	0.359381	0.731978	2.69739	6056.77	T13C5.6	T13C5.6	[GO:0003824] MOLECULAR_FUNCTION catalytic activity (IEA) | [GO:0016020] CELLULAR_COMPONENT membrane (IEA) | [GO:0016021] CELLULAR_COMPONENT integral to membrane (IEA)	WBGene00020486
														182579_at	0.27234	0.0012	2.7953	0.03975	16.272	0.282918	0.72545	2.32225	17.9514	fbxa-164	C08E3.7	[GO:0003735] MOLECULAR_FUNCTION structural constituent of ribosome (IEA) | [GO:0005622] CELLULAR_COMPONENT intracellular (IEA) | [GO:0005840] CELLULAR_COMPONENT ribosome (IEA) | [GO:0006412] BIOLOGICAL_PROCESS translation (IEA)	WBGene00015599
														182596_s_at	0.34458	0.0036	3.9001	0.0099395	18.784	0.219247	0.747485	2.39422	865179	D2096.8	D2096.8	[GO:0005634] CELLULAR_COMPONENT nucleus (IEA) | [GO:0006334] BIOLOGICAL_PROCESS nucleosome assembly (IEA) | [GO:0040010] BIOLOGICAL_PROCESS positive regulation of growth rate (IMP) | [GO:0009792] BIOLOGICAL_PROCESS embryonic development ending in birth or egg hatching (IMP) | [GO:0002009] BIOLOGICAL_PROCESS morphogenesis of an epithelium (IMP) | [GO:0040011] BIOLOGICAL_PROCESS locomotion (IMP) | …	WBGene00017075
														182597_at	0.66503	0	11.3469	1.07e-05	7.412	0.657304	0.843775	8.62719	2839.55	T07E3.4	T07E3.4		WBGene00020315
														182614_at	0.34989	0.0016	3.9203	0.0097014	8.406	0.118623	0.842213	2.10811	476.157	tig-2	F39G3.8	[GO:0008083] MOLECULAR_FUNCTION growth factor activity (IEA) | [GO:0040010] BIOLOGICAL_PROCESS positive regulation of growth rate (IMP)	WBGene00006570
														182630_at	0.29212	0.0024	5.7019	0.0013265	15.686	0.349609	0.494128	3.8338	1569.37	F52D10.2	F52D10.2		WBGene00009930
														182643_at	0.24261	0.0181	2.9391	0.032975	19.23	0.0774844	0.589213	2.63987	31.6903	C41H7.5	C41H7.5	[GO:0040010] BIOLOGICAL_PROCESS positive regulation of growth rate (IMP) | [GO:0040011] BIOLOGICAL_PROCESS locomotion (IMP) | [GO:0009792] BIOLOGICAL_PROCESS embryonic development ending in birth or egg hatching (IMP) | [GO:0002119] BIOLOGICAL_PROCESS nematode larval development (IMP) | [GO:0040007] BIOLOGICAL_PROCESS growth (IMP) | [GO:0010171] BIOLOGICAL_PROCESS body morphogenesis (IMP)	WBGene00016575
														182645_at	0.2635	0.0121	2.9079	0.034334	7.694	0.330624	0.594719	2.59226	48497.4	F44E7.9	F44E7.9	[GO:0016021] CELLULAR_COMPONENT integral to membrane (IEA)	WBGene00018431
														182660_at	0.45111	0	6.06	0.00091915	19.884	0.563769	0.872632	4.36163	5977.61	kel-8	W02G9.2	[GO:0043005] CELLULAR_COMPONENT neuron projection (IDA) via [WBPaper00027017] Schaefer H et al. (2006) | [GO:0043025] CELLULAR_COMPONENT cell soma (IDA) via [WBPaper00027017] Schaefer H et al. (2006) | [GO:0014069] CELLULAR_COMPONENT postsynaptic density (IDA) via [WBPaper00027017] Schaefer H et al. (2006) | [GO:0005515] MOLECULAR_FUNCTION protein binding (IEA)	WBGene00020952
														182667_at	0.44343	0	6.4153	0.00064513	9.109	0.518213	0.635818	9.19046	53.9148	srr-6	C13D9.1	[GO:0016021] CELLULAR_COMPONENT integral to membrane (IEA)	WBGene00005657
														182685_at	0.284	0.0067	4.6177	0.0043015	8.415	0.298218	0.702517	13.0645	2427.37	hen-1	C36B7.7	[GO:0008306] BIOLOGICAL_PROCESS associative learning (IMP) via [WBPaper00005300] Ishihara T et al. (2002) | [GO:0030424] CELLULAR_COMPONENT axon (IDA) via [WBPaper00005300] Ishihara T et al. (2002) | [GO:0043025] CELLULAR_COMPONENT cell soma (IDA) via [WBPaper00005300] Ishihara T et al. (2002)	WBGene00001841
														182704_at	0.54479	0	8.9369	6.7e-05	6.91	0.592346	0.814301	4.72593	477.133	F37C4.4	F37C4.4	[GO:0016021] CELLULAR_COMPONENT integral to membrane (IEA) | [GO:0009792] BIOLOGICAL_PROCESS embryonic development ending in birth or egg hatching (IMP) | [GO:0000003] BIOLOGICAL_PROCESS reproduction (IMP)	WBGene00018144
														182710_at	0.33884	0.0021	3.8517	0.010536	12.257	0.179996	0.491128	3.09436	366.307	C35B8.3	C35B8.3		WBGene00016438
														182723_at	0.28469	0.0082	3.939	0.0094871	5.845	0.377046	0.486709	5.59504	53.8439	E04F6.6	E04F6.6	[GO:0003824] MOLECULAR_FUNCTION catalytic activity (IEA)	WBGene00017126
														182747_at	0.50854	0	5.4336	0.0017581	21.741	0.395098	0.61426	10.9663	5100.96	R08E5.3	R08E5.3	[GO:0008152] BIOLOGICAL_PROCESS metabolic process (IEA) | [GO:0008168] MOLECULAR_FUNCTION methyltransferase activity (IEA)	WBGene00019963
														182751_at	0.37742	0.0003	5.2181	0.0022141	5.152	0.306317	0.885129	5.78451	16.9087	C16D9.5	C16D9.5	[GO:0016021] CELLULAR_COMPONENT integral to membrane (IEA)	WBGene00015860
														182754_at	0.39425	0.0017	5.5077	0.0016254	22.519	0.383821	0.53972	5.53947	226048	C16B8.3	C16B8.3		WBGene00015823
														182758_at	0.37732	0.0019	4.0412	0.008398	8.86	0.163635	0.497216	2.68013	22006.9	B0261.4	B0261.4	[GO:0003735] MOLECULAR_FUNCTION structural constituent of ribosome (IEA) | [GO:0005761] CELLULAR_COMPONENT mitochondrial ribosome (IEA) | [GO:0006412] BIOLOGICAL_PROCESS translation (IEA) | [GO:0040010] BIOLOGICAL_PROCESS positive regulation of growth rate (IMP) | [GO:0009792] BIOLOGICAL_PROCESS embryonic development ending in birth or egg hatching (IMP) | [GO:0010171] BIOLOGICAL_PROCESS body mor…	WBGene00015092
														182791_at	0.24482	0.0092	3.4325	0.017619	22.371	0.355148	0.637449	4.37474	341.338	ZC250.2	ZC250.2		WBGene00022576
														182793_at	0.25375	0.0179	6.0854	0.0008959	10.29	0.365757	0.759462	6.12347	719.475	C11G10.1	C11G10.1	[GO:0016021] CELLULAR_COMPONENT integral to membrane (IEA)	WBGene00007525
														182808_s_at	0.19923	0.0189	3.3266	0.020117	1.573	0.314765	0.565391	3.19284	287004	F55B11.4	F55B11.4	[GO:0005622] CELLULAR_COMPONENT intracellular (IEA) | [GO:0008270] MOLECULAR_FUNCTION zinc ion binding (IEA)	WBGene00010086
														182814_at	0.3245	0.0028	3.3354	0.019894	19.873	0.148113	0.859172	6.07248	38140.5	prg-2	C01G5.2	[GO:0009792] BIOLOGICAL_PROCESS embryonic development ending in birth or egg hatching (IMP)	WBGene00004179
														182819_at	0.24029	0.0024	4.7822	0.0035745	15.442	0.331441	0.691872	3.53512	21.3683	F13H8.8	F13H8.8		WBGene00017441
														182828_at	0.32261	0.0035	3.317	0.020361	14.949	0.13328	0.464895	16.3337	4872	F10G2.4	F10G2.4		WBGene00017365
														182843_at	0.27736	0.0104	2.7389	0.042797	15.626	0.300219	0.625052	4.08882	1345.74	Y44A6C.1	Y44A6C.1		WBGene00012850
														182849_at	0.50357	0.0001	5.5293	0.0015888	7.548	0.522835	0.857798	3.75223	5714.8	Y37A1B.5	Y37A1B.5	[GO:0008430] MOLECULAR_FUNCTION selenium binding (IEA)	WBGene00012538
														182867_at	0.33066	0.0034	4.7235	0.0038174	3.546	0.390691	0.587998	4.28483	327.497	nhr-76	C05G6.1	[GO:0003700] MOLECULAR_FUNCTION transcription factor activity (IEA) | [GO:0003707] MOLECULAR_FUNCTION steroid hormone receptor activity (IEA) | [GO:0005634] CELLULAR_COMPONENT nucleus (IEA) | [GO:0006355] BIOLOGICAL_PROCESS regulation of transcription, DNA-dependent (IEA) | [GO:0008270] MOLECULAR_FUNCTION zinc ion binding (IEA) | [GO:0043565] MOLECULAR_FUNCTION sequence-specific DNA binding (IEA)	WBGene00015497
														182879_at	0.34033	0.0002	5.7124	0.001312	13.435	0.378506	0.928283	1.96736	51.4654	T23E1.2	T23E1.2	[GO:0018991] BIOLOGICAL_PROCESS oviposition (IMP)	WBGene00020729
														182904_at	0.35799	0.0011	2.8616	0.03646	19.441	0.139045	0.423272	17.0674	639.454	W03D2.6	W03D2.6	[GO:0016021] CELLULAR_COMPONENT integral to membrane (IEA)	WBGene00020981
														182917_at	0.59768	0	7.6417	0.00020386	5.578	0.466531	0.684593	7.6962	671.206	F37B12.1	F37B12.1	[GO:0016021] CELLULAR_COMPONENT integral to membrane (IEA) | [GO:0002009] BIOLOGICAL_PROCESS morphogenesis of an epithelium (IMP) | [GO:0018991] BIOLOGICAL_PROCESS oviposition (IMP) | [GO:0040035] BIOLOGICAL_PROCESS hermaphrodite genitalia development (IMP)	WBGene00009504
														182931_at	0.53649	0	7.0514	0.00035036	3.931	0.493718	0.91659	7.67233	451.316	C49A9.6	C49A9.6		WBGene00016760
														182954_s_at	0.31375	0.0052	2.8506	0.036987	16.309	0.0950474	0.632463	3.05534	53169.9	T07A9.9	T07A9.9	[GO:0005525] MOLECULAR_FUNCTION GTP binding (IEA) | [GO:0040010] BIOLOGICAL_PROCESS positive regulation of growth rate (IMP) | [GO:0009792] BIOLOGICAL_PROCESS embryonic development ending in birth or egg hatching (IMP) | [GO:0000003] BIOLOGICAL_PROCESS reproduction (IMP) | [GO:0002119] BIOLOGICAL_PROCESS nematode larval development (IMP) | [GO:0040007] BIOLOGICAL_PROCESS growth (IMP) | [GO:004001…	WBGene00020297
														182961_at	0.25062	0.0193	2.8456	0.037227	11.648	0.128906	0.623421	3.47691	14994.2	R02D3.8	R02D3.8	[GO:0004527] MOLECULAR_FUNCTION exonuclease activity (IEA) | [GO:0005622] CELLULAR_COMPONENT intracellular (IEA)	WBGene00019825
														182965_at	0.439	0.0006	4.5344	0.0047289	20.8	0.451635	0.817479	2.53146	21079	F38A5.2	F38A5.2		WBGene00018161
														182966_at	0.31889	0.0025	5.0024	0.0028005	3.814	0.328488	0.773014	27.7468	372.578	ZK154.1	ZK154.1		WBGene00022665
														182969_at	0.37429	0	5.1278	0.0024417	19.833	0.396841	0.573185	1.75013	471.795	F43E2.1	F43E2.1	[GO:0009792] BIOLOGICAL_PROCESS embryonic development ending in birth or egg hatching (IMP)	WBGene00018390
														182976_at	0.32965	0.0024	4.5172	0.0048227	19.045	0.3179	0.56446	4.67473	44.8645	C24G7.4	C24G7.4	[GO:0005272] MOLECULAR_FUNCTION sodium channel activity (IEA) | [GO:0006814] BIOLOGICAL_PROCESS sodium ion transport (IEA) | [GO:0016020] CELLULAR_COMPONENT membrane (IEA) | [GO:0016021] CELLULAR_COMPONENT integral to membrane (IEA)	WBGene00016066
														182979_at	0.37085	0.0011	3.8881	0.010084	6.648	0.12638	0.706713	2.61648	287.968	K08B5.2	K08B5.2		WBGene00019519
														182980_at	0.44877	0.0001	6.4029	0.00065303	10.863	0.348529	0.502869	9.35937	2921.98	T08B1.4	T08B1.4		WBGene00020341
														182984_at	0.22647	0.0192	2.6726	0.046687	2.079	0.131723	0.456812	4.04956	65.2443	F07C3.2	F07C3.2	[GO:0016021] CELLULAR_COMPONENT integral to membrane (IEA)	WBGene00017193
														183027_at	0.43864	0.0005	4.1886	0.0070565	9.757	0.387022	0.814401	28.3613	240.057	fbxc-34	R07C3.5		WBGene00019921
														183036_at	0.26439	0.0074	4.7805	0.0035814	4.946	0.296812	0.610829	5.39286	1867.59	F32B5.6	F32B5.6	[GO:0009792] BIOLOGICAL_PROCESS embryonic development ending in birth or egg hatching (IMP)	WBGene00017979
[truncated: 982 more rows]
