# Supplementary material for: Genome-Wide Analysis of Light- and Temperature-Entrained Circadian Transcripts in Caenorhabditis elegans
Source: PLoS Biol. 2010 Oct 12;8(10):e1000503. doi: 10.1371/journal.pbio.1000503 (PMC2953524; doi:10.1371/journal.pbio.1000503)
Supplement: Table S3 — GO categories and lists of all light- and temperature-entrained transcripts. (0.47 MB XLS) [file pbio.1000503.s007.xls]

## Sheet: Light and Temperature Entrained
Supplemental Table 3. GO categories and lists of all light- and temperature-entrained transcripts.
LDDD 6-day appended data set															DD 3-day appended data set														WC/CC 6-day appended data set															CC 3-day appended data set
Transcripts that cycle both in LD and DD (pF24<0.02)															Transcripts that cycle in DD but not in LD (pF24<0.02)														Transcripts that cycle both in WC and CC (pF24<0.02)															Transcripts that cycle in CC but not in WC (pF24<0.02)
Affymetrix	Fourier		ANOVA (DD)			AC24		Fold change	Fold change	Expression	WS195 Wormbase				Affymetrix	Fourier		ANOVA			AC24		Fold change	Expression	WS195 Wormbase				Affymetrix	Fourier		ANOVA (CC)			AC24		Fold change	Fold change	Expression	WS195 Wormbase				Affymetrix	Fourier		ANOVA (CC)
Probe ID set	F24	p-value	F	p-value	Phase	Avg	Max	LD	DD	Avg	Gene Public Name	Sequence Name	GoTerm info	Gene WB ID	Probe ID set	F24	p-value	F	p-value	Phase	Avg	Max	DD	Avg	Gene Public Name	Sequence Name	GoTerm info	Gene WB ID	Probe ID set	F24	p-value	F	p-value	Phase	Avg	Max	WC	CC	Avg	Gene Public Name	Sequence Name	GoTerm info	Gene WB ID	Probe ID set	F24	p-value	F	p-value	Phase
171721_x_at	0.31229	0.0017	4.3465	0.017247	14.851	0.340359	0.547351	1.69454	1.80674	62780.3	T01G9.3	T01G9.3	[GO:0005515] MOLECULAR_FUNCTION protein binding (IEA) | [GO:0016021] CELLULAR_COMPONENT integral to membrane (IEA)	WBGene00011345	171744_x_at	0.55502	0.0032	5.4888	0.0073964	13.152	0.530955	0.707439	1.66294	374.582	F54D12.4	F54D12.4	[GO:0002119] BIOLOGICAL_PROCESS nematode larval development (IMP) | [GO:0040007] BIOLOGICAL_PROCESS growth (IMP) | [GO:0010171] BIOLOGICAL_PROCESS body morphogenesis (IMP) | [GO:0040011] BIOLOGICAL_PROCESS locomotion (IMP)	WBGene00018817	171787_x_at	0.2122	0.0185	3.3926	0.038501	10.964	0.244109	0.526272	1.56608	1.58218	1841.09	sto-4	Y71H9A.3	[GO:0016020] CELLULAR_COMPONENT membrane (IEA) | [GO:0016021] CELLULAR_COMPONENT integral to membrane (IEA)	WBGene00006066	171762_x_at	0.27416	0.0185	3.3924	0.038509	16.407
171735_x_at	0.42734	0.0001	6.2391	0.0044859	8.584	0.33125	0.671429	1.98765	2.08886	27046.7	col-147	T06E4.4	[GO:0016021] CELLULAR_COMPONENT integral to membrane (IEA) | [GO:0009792] BIOLOGICAL_PROCESS embryonic development ending in birth or egg hatching (IMP)	WBGene00000720	171758_x_at	0.32216	0.0164	3.412	0.037841	4.756	0.31585	0.595307	1.8771	1691.43	F49E2.5	F49E2.5	[GO:0002119] BIOLOGICAL_PROCESS nematode larval development (IMP)	WBGene00009888	172625_x_at	0.35112	0.0011	3.162	0.047468	22.095	0.18683	0.500929	2.79646	2.31462	127928	nlp-36	B0464.3	[GO:0016021] CELLULAR_COMPONENT integral to membrane (IEA)	WBGene00007185	172159_x_at	0.58308	0	12.1499	0.00023503	16.964
171742_x_at	0.397	0.0005	3.1774	0.046803	17.947	0.386464	0.551004	2.79099	2.23257	248740	skr-8	C52D10.9	[GO:0006511] BIOLOGICAL_PROCESS ubiquitin-dependent protein catabolic process (IEA) | [GO:0005515] MOLECULAR_FUNCTION protein binding (IEA) | [GO:0040010] BIOLOGICAL_PROCESS positive regulation of growth rate (IMP) | [GO:0009792] BIOLOGICAL_PROCESS embryonic development ending in birth or egg hatching (IMP) | [GO:0002119] BIOLOGICAL_PROCESS nematode larval development (IMP) | [GO:0040007] BIOLOGI…	WBGene00004814	171841_x_at	0.5447	0.0008	5.0501	0.010104	6.228	0.483311	0.684279	2.76542	153.496	hlh-11	F58A4.7	[GO:0005634] CELLULAR_COMPONENT nucleus (IEA) | [GO:0030528] MOLECULAR_FUNCTION transcription regulator activity (IEA) | [GO:0045449] BIOLOGICAL_PROCESS regulation of transcription (IEA)	WBGene00001955	172832_x_at	0.30225	0.002	3.6296	0.031246	5.573	0.183208	0.326387	2.24911	3.27152	171.274	gly-6	H38K22.5	[GO:0016021] CELLULAR_COMPONENT integral to membrane (IEA)	WBGene00001631	172251_x_at	0.50336	0.0027	4.7831	0.012313	17.691
171756_x_at	0.35128	0.0001	3.563	0.033113	9.672	0.0311769	0.721848	1.97948	2.21975	658288	col-94	W05B2.1	[GO:0016021] CELLULAR_COMPONENT integral to membrane (IEA) | [GO:0009792] BIOLOGICAL_PROCESS embryonic development ending in birth or egg hatching (IMP) | [GO:0002119] BIOLOGICAL_PROCESS nematode larval development (IMP) | [GO:0040007] BIOLOGICAL_PROCESS growth (IMP) | [GO:0010171] BIOLOGICAL_PROCESS body morphogenesis (IMP) | [GO:0040011] BIOLOGICAL_PROCESS locomotion (IMP) | [GO:0040010] BIOLOG…	WBGene00000669	171901_x_at	0.40067	0.0021	4.5843	0.014323	6.363	0.469134	0.77512	2.07521	5916.91	haf-4	W04C9.1	[GO:0006629] BIOLOGICAL_PROCESS lipid metabolic process (IMP) via [WBPaper00028970] Schroeder LK et al. (2007) | [GO:0005524] MOLECULAR_FUNCTION ATP binding (IEA) | [GO:0006810] BIOLOGICAL_PROCESS transport (IEA) | [GO:0016021] CELLULAR_COMPONENT integral to membrane (IEA) | [GO:0042626] MOLECULAR_FUNCTION ATPase activity, coupled to transmembrane movement of substances (IEA) | [GO:0016887] MOLEC…	WBGene00001814	172838_x_at	0.23647	0.0122	3.5869	0.032429	23.614	0.332761	0.593267	6.99478	2.77531	25396.6	abts-1	F52B5.1	[GO:0015380] MOLECULAR_FUNCTION anion exchanger activity (IDA) via [WBPaper00025075] Sherman T et al. (2005) | [GO:0015108] MOLECULAR_FUNCTION chloride transmembrane transporter activity (IDA) via [WBPaper00025075] Sherman T et al. (2005) | [GO:0005452] MOLECULAR_FUNCTION inorganic anion exchanger activity (IEA) | [GO:0006820] BIOLOGICAL_PROCESS anion transport (IEA) | [GO:0016020] CELLULAR_COMPO…	WBGene00009920	172375_x_at	0.21409	0.0033	4.9745	0.01068	16.889
171768_x_at	0.42582	0	5.6876	0.0064532	9.39	0.385146	0.844468	2.03914	2.26365	462301	col-144	B0222.6	[GO:0016021] CELLULAR_COMPONENT integral to membrane (IEA)	WBGene00000717	171946_x_at	0.42661	0.0056	3.7645	0.027825	13.01	0.305402	0.714064	1.70187	16319.5	clic-1	T05B11.3	[GO:0005198] MOLECULAR_FUNCTION structural molecule activity (IEA) | [GO:0005515] MOLECULAR_FUNCTION protein binding (IEA) | [GO:0006886] BIOLOGICAL_PROCESS intracellular protein transport (IEA) | [GO:0016192] BIOLOGICAL_PROCESS vesicle-mediated transport (IEA) | [GO:0030130] CELLULAR_COMPONENT clathrin coat of trans-Golgi network vesicle (IEA) | [GO:0030132] CELLULAR_COMPONENT clathrin coat of c…	WBGene00020246	172911_x_at	0.2831	0.0035	3.4328	0.037145	15.248	0.318792	0.643101	1.74367	1.83785	1.87362e+06	rpl-29	B0513.3	[GO:0003735] MOLECULAR_FUNCTION structural constituent of ribosome (IEA) | [GO:0005622] CELLULAR_COMPONENT intracellular (IEA) | [GO:0005840] CELLULAR_COMPONENT ribosome (IEA) | [GO:0006412] BIOLOGICAL_PROCESS translation (IEA)	WBGene00004443	172378_x_at	0.61868	0.0003	6.0037	0.0052255	17.54
171770_x_at	0.42354	0.0001	5.088	0.0098296	9.178	0.0614585	0.722489	2.10521	2.4516	690454	col-93	W05B2.5	[GO:0016021] CELLULAR_COMPONENT integral to membrane (IEA) | [GO:0009792] BIOLOGICAL_PROCESS embryonic development ending in birth or egg hatching (IMP) | [GO:0002119] BIOLOGICAL_PROCESS nematode larval development (IMP) | [GO:0040007] BIOLOGICAL_PROCESS growth (IMP) | [GO:0010171] BIOLOGICAL_PROCESS body morphogenesis (IMP) | [GO:0040011] BIOLOGICAL_PROCESS locomotion (IMP) | [GO:0040010] BIOLOG…	WBGene00000668	172209_x_at	0.50856	0.0004	3.6603	0.030427	5.578	0.314446	0.658425	2.29147	441494	col-93	W05B2.5	[GO:0016021] CELLULAR_COMPONENT integral to membrane (IEA) | [GO:0009792] BIOLOGICAL_PROCESS embryonic development ending in birth or egg hatching (IMP) | [GO:0002119] BIOLOGICAL_PROCESS nematode larval development (IMP) | [GO:0040007] BIOLOGICAL_PROCESS growth (IMP) | [GO:0010171] BIOLOGICAL_PROCESS body morphogenesis (IMP) | [GO:0040011] BIOLOGICAL_PROCESS locomotion (IMP) | [GO:0040010] BIOLOG…	WBGene00000668	173485_s_at	0.29728	0.0019	4.0848	0.021293	7.552	0.0328325	0.808213	2.37692	2.13309	25279.9	B0546.4	B0546.4		WBGene00015251	172386_x_at	0.34161	0.0077	4.3412	0.01732	15.824
171888_x_at	0.48322	0.0001	4.2077	0.01927	18.805	0.185462	0.433961	1.81878	1.57723	721.507	Y37D8A.21	Y37D8A.21	[GO:0003676] MOLECULAR_FUNCTION nucleic acid binding (IEA) | [GO:0000166] MOLECULAR_FUNCTION nucleotide binding (IEA) | [GO:0002119] BIOLOGICAL_PROCESS nematode larval development (IMP) | [GO:0040007] BIOLOGICAL_PROCESS growth (IMP)	WBGene00012558	172243_x_at	0.49109	0.0019	9.0771	0.00091196	7.135	0.686551	0.805488	1.92791	90.7297	Y41E3.5	Y41E3.5			173585_at	0.30315	0.0019	3.2822	0.042527	21.772	0.258535	0.335279	2.09511	2.00108	29156.1	F16D3.4	F16D3.4			172404_x_at	0.42372	0.009	3.4673	0.036025	16.747
171919_x_at	0.33689	0.0016	3.6435	0.030873	8.303	0.0709841	0.482565	2.89561	2.24071	113999	F37C4.5	F37C4.5		WBGene00018145	172292_x_at	0.4075	0.0162	6.2707	0.004396	8.586	0.554718	0.723539	1.99123	54.471	D2092.8	D2092.8		WBGene00017068	173792_s_at	0.2273	0.0144	10.0891	0.00056388	23.616	0.0519042	0.426341	2.11373	3.09515	55.7044	C28A5.6	C28A5.6			172437_x_at	0.23626	0.0026	3.4673	0.036024	16.999
172007_x_at	0.42446	0.0002	4.028	0.022311	8.624	0.570365	0.869183	1.44658	1.54136	237570	pab-1	Y106G6H.2	[GO:0003729] MOLECULAR_FUNCTION mRNA binding (IDA) via [WBPaper00005428] Roy PJ et al. (2002) | [GO:0003676] MOLECULAR_FUNCTION nucleic acid binding (IEA) | [GO:0003723] MOLECULAR_FUNCTION RNA binding (IEA) | [GO:0000166] MOLECULAR_FUNCTION nucleotide binding (IEA) | [GO:0040010] BIOLOGICAL_PROCESS positive regulation of growth rate (IMP) | [GO:0000003] BIOLOGICAL_PROCESS reproduction (IMP) | [GO…	WBGene00003902	172669_x_at	0.44511	0.0084	3.2941	0.04207	9.239	0.444933	0.723593	2.15384	3082.86	ssp-10	K07F5.9	[GO:0005198] MOLECULAR_FUNCTION structural molecule activity (IEA) | [GO:0040018] BIOLOGICAL_PROCESS positive regulation of multicellular organism growth (IMP) | [GO:0000003] BIOLOGICAL_PROCESS reproduction (IMP)	WBGene00006039	173937_at	0.24555	0.009	3.1111	0.04976	21.062	0.192927	0.562428	2.16809	1.81898	23311	F30F8.1	F30F8.1		WBGene00009270	172484_x_at	0.53095	0.005	3.4948	0.035158	16.9
172196_x_at	0.22682	0.0162	3.4238	0.037445	9.371	0.0338281	0.502137	1.78826	3.73962	539.342	col-65	K08C9.4	[GO:0016021] CELLULAR_COMPONENT integral to membrane (IEA)	WBGene00000641	172845_x_at	0.42478	0.0032	3.6894	0.029674	14.533	0.400502	0.549614	1.83375	21596.3	K08F11.5	K08F11.5	[GO:0005525] MOLECULAR_FUNCTION GTP binding (IEA) | [GO:0007264] BIOLOGICAL_PROCESS small GTPase mediated signal transduction (IEA) | [GO:0005509] MOLECULAR_FUNCTION calcium ion binding (IEA) | [GO:0005622] CELLULAR_COMPONENT intracellular (IEA) | [GO:0015031] BIOLOGICAL_PROCESS protein transport (IEA) | [GO:0016021] CELLULAR_COMPONENT integral to membrane (IEA) | [GO:0002119] BIOLOGICAL_PROCESS …	WBGene00019544	174319_at	0.3392	0.0006	8.19	0.0014375	13.813	0.380655	0.637893	1.83983	1.97327	53697.8	C55C3.5	C55C3.5			172498_x_at	0.41313	0.0077	3.1414	0.048382	4.28
172197_x_at	0.3541	0.0008	4.1792	0.019719	9.371	0.0606205	0.67502	2.12095	2.15676	521052	col-94	W05B2.1	[GO:0016021] CELLULAR_COMPONENT integral to membrane (IEA) | [GO:0009792] BIOLOGICAL_PROCESS embryonic development ending in birth or egg hatching (IMP) | [GO:0002119] BIOLOGICAL_PROCESS nematode larval development (IMP) | [GO:0040007] BIOLOGICAL_PROCESS growth (IMP) | [GO:0010171] BIOLOGICAL_PROCESS body morphogenesis (IMP) | [GO:0040011] BIOLOGICAL_PROCESS locomotion (IMP) | [GO:0040010] BIOLOG…	WBGene00000669	172866_x_at	0.5119	0.0038	5.6131	0.0067894	1.588	0.46919	0.927173	2.6235	1549.49	oat-1	T01B11.7	[GO:0005215] MOLECULAR_FUNCTION transporter activity (IEA) | [GO:0006810] BIOLOGICAL_PROCESS transport (IEA) | [GO:0016020] CELLULAR_COMPONENT membrane (IEA) | [GO:0016021] CELLULAR_COMPONENT integral to membrane (IEA)	WBGene00003837	174447_at	0.32006	0.0023	3.4264	0.037358	14.435	0.330878	0.783276	2.52963	2.30863	38782.3	dylt-1	F13G3.4	[GO:0009792] BIOLOGICAL_PROCESS embryonic development ending in birth or egg hatching (IMP)	WBGene00008764	172531_x_at	0.46221	0.0086	3.3897	0.038601	5.812
172284_x_at	0.20583	0.0157	3.7006	0.02939	10.358	0.270622	0.438457	3.76346	1.64133	21915.7	fip-2	T27E4.4		WBGene00020862	173110_at	0.53905	0.0016	3.3272	0.040832	14.281	0.334743	0.592487	1.67142	28706.1	oma-2	ZC513.6	[GO:0005813] CELLULAR_COMPONENT centrosome (IDA) via [WBPaper00005454] Shimada M et al. (2002) | [GO:0005737] CELLULAR_COMPONENT cytoplasm (IDA) via [WBPaper00005454] Shimada M et al. (2002) | [GO:0043186] CELLULAR_COMPONENT P granule (IDA) via [WBPaper00005454] Shimada M et al. (2002) | [GO:0003676] MOLECULAR_FUNCTION nucleic acid binding (IEA) | [GO:0008270] MOLECULAR_FUNCTION zinc ion binding …	WBGene00003865	174486_at	0.42418	0.0001	4.202	0.01936	22.093	0.311341	0.493659	2.03587	2.04728	41443.8	C41G7.3	C41G7.3	[GO:0003723] MOLECULAR_FUNCTION RNA binding (IEA) | [GO:0045132] BIOLOGICAL_PROCESS meiotic chromosome segregation (IMP)	WBGene00008061	172570_x_at	0.49094	0.0073	3.6428	0.030891	16.29
172324_x_at	0.26078	0.0059	3.5026	0.034917	10.106	0.0388943	0.318713	1.57903	1.52441	1.39703e+06	nspc-14	F42F12.7		WBGene00009638	173192_s_at	0.34279	0.0053	3.4587	0.036301	7.628	0.407137	0.768849	1.87421	6073.74	Y60A3A.7	Y60A3A.7	[GO:0004091] MOLECULAR_FUNCTION carboxylesterase activity (IEA) | [GO:0016021] CELLULAR_COMPONENT integral to membrane (IEA)	WBGene00013358	174757_at	0.31948	0.0015	4.4185	0.016295	16.208	0.0321543	0.443808	2.05817	2.11884	7903.86	K02C4.3	K02C4.3			172657_x_at	0.44411	0.0103	3.2744	0.04283	16.885
172352_at	0.28821	0.0044	4.384	0.016743	3.276	0.127486	0.403439	3.61457	4.56195	1451.6	C33A12.4	C33A12.4		WBGene00007883	173455_s_at	0.39146	0.004	3.9142	0.024521	16.702	0.387749	0.497516	2.00905	875912	hel-1	C26D10.2	[GO:0005634] CELLULAR_COMPONENT nucleus (IDA) via [WBPaper00005959] MacMorris M et al. (2003) | [GO:0003676] MOLECULAR_FUNCTION nucleic acid binding (IEA) | [GO:0004386] MOLECULAR_FUNCTION helicase activity (IEA) | [GO:0005524] MOLECULAR_FUNCTION ATP binding (IEA) | [GO:0008026] MOLECULAR_FUNCTION ATP-dependent helicase activity (IEA) | [GO:0009792] BIOLOGICAL_PROCESS embryonic development ending…	WBGene00001840	174845_s_at	0.29353	0.0029	3.9983	0.022864	18.811	0.502436	0.554725	1.90561	1.62901	50561.2	ZK370.3	ZK370.3			172805_x_at	0.52665	0.0007	4.8601	0.011623	16.322
172472_x_at	0.34418	0.0014	3.505	0.034843	9.439	0.266793	0.785678	2.08863	2.28545	400182	col-144	B0222.6	[GO:0016021] CELLULAR_COMPONENT integral to membrane (IEA)	WBGene00000717	173595_s_at	0.41143	0.0074	3.2702	0.042992	21.639	0.230926	0.780424	2.00503	14.9799	Y32H12A.8	Y32H12A.8		WBGene00021316	174941_s_at	0.3135	0.0013	4.5399	0.014824	14.469	0.153407	0.685957	1.9876	1.79469	5477.03	Y105E8A.23	Y105E8A.23			173470_s_at	0.56482	0.0025	4.1059	0.020929	18.904
172615_x_at	0.39881	0.0001	7.4293	0.0021859	18.365	0.481161	0.703278	2.05691	1.60665	323489	cyb-2.2	H31G24.4	[GO:0001556] BIOLOGICAL_PROCESS oocyte maturation (IGI) via [WBPaper00027048] Burrows AE et al. (2006) | [GO:0009792] BIOLOGICAL_PROCESS embryonic development ending in birth or egg hatching (IMP) | [GO:0002119] BIOLOGICAL_PROCESS nematode larval development (IMP) | [GO:0040007] BIOLOGICAL_PROCESS growth (IMP) | [GO:0000003] BIOLOGICAL_PROCESS reproduction (IMP) | [GO:0000910] BIOLOGICAL_PROCESS …	WBGene00000867	173600_s_at	0.30964	0.0106	3.9223	0.024355	16.736	0.389238	0.657864	2.75943	4199.27	R07E4.5	R07E4.5		WBGene00019938	174971_at	0.298	0.0026	3.2147	0.045226	18.044	0.311129	0.584295	2.1587	1.79673	4433.3	cash-1	K07C5.8			173696_at	0.35827	0.0047	4.1854	0.019621	16.902
172700_x_at	0.33681	0.0009	3.7053	0.02927	9.61	0.122983	0.79688	1.65466	1.82755	512670	col-157	T11F9.9	[GO:0016021] CELLULAR_COMPONENT integral to membrane (IEA) | [GO:0010171] BIOLOGICAL_PROCESS body morphogenesis (IMP) | [GO:0040011] BIOLOGICAL_PROCESS locomotion (IMP) | [GO:0002119] BIOLOGICAL_PROCESS nematode larval development (IMP) | [GO:0040007] BIOLOGICAL_PROCESS growth (IMP) | [GO:0009792] BIOLOGICAL_PROCESS embryonic development ending in birth or egg hatching (IMP)	WBGene00000730	173663_at	0.45476	0.0057	3.7874	0.027288	15.826	0.359368	0.70549	2.03924	3699.85	T28F3.1	T28F3.1		WBGene00012128	175100_s_at	0.24573	0.0105	3.1499	0.048002	14.148	0.0123816	0.266692	1.39386	1.56316	2.02836e+06	rps-24	T07A9.11	[GO:0003735] MOLECULAR_FUNCTION structural constituent of ribosome (IEA) | [GO:0005622] CELLULAR_COMPONENT intracellular (IEA) | [GO:0005840] CELLULAR_COMPONENT ribosome (IEA) | [GO:0006412] BIOLOGICAL_PROCESS translation (IEA) | [GO:0000166] MOLECULAR_FUNCTION nucleotide binding (IEA) | [GO:0000003] BIOLOGICAL_PROCESS reproduction (IMP) | [GO:0002119] BIOLOGICAL_PROCESS nematode larval developme…	WBGene00004493	173723_s_at	0.44933	0.006	3.1349	0.048672	4.629
172701_x_at	0.29711	0.0025	4.3289	0.017489	3.871	0.333114	0.523738	1.67957	2.47281	360078	col-125	C29F4.1	[GO:0016021] CELLULAR_COMPONENT integral to membrane (IEA) | [GO:0002119] BIOLOGICAL_PROCESS nematode larval development (IMP) | [GO:0010171] BIOLOGICAL_PROCESS body morphogenesis (IMP) | [GO:0040011] BIOLOGICAL_PROCESS locomotion (IMP)	WBGene00000699	173675_at	0.56114	0.0007	4.4658	0.015702	13.587	0.396053	0.712125	2.10125	28032.7	F59A3.4	F59A3.4			175128_s_at	0.3112	0.0016	3.1661	0.04729	13.254	0.035226	0.477312	1.80189	2.59843	40155.2	W02B12.15	W02B12.15	[GO:0031966] CELLULAR_COMPONENT mitochondrial membrane (IEA) | [GO:0051537] MOLECULAR_FUNCTION 2 iron, 2 sulfur cluster binding (IEA) | [GO:0016021] CELLULAR_COMPONENT integral to membrane (IEA)	WBGene00044026	173776_s_at	0.32081	0.004	3.1239	0.049171	6.358
172709_x_at	0.46934	0	5.8691	0.0057116	9.086	0.307366	0.891023	1.86567	2.25684	84500.2	col-147	T06E4.4	[GO:0016021] CELLULAR_COMPONENT integral to membrane (IEA) | [GO:0009792] BIOLOGICAL_PROCESS embryonic development ending in birth or egg hatching (IMP)	WBGene00000720	173811_at	0.42968	0.007	4.7401	0.012718	5.519	0.50185	0.763966	2.17277	10524.2	F53H10.2	F53H10.2			175146_at	0.35655	0.0006	3.3904	0.038578	20.588	0.479811	0.623958	2.73241	2.01751	10020	pkc-1	F57F5.5			173963_s_at	0.46858	0.0128	3.8572	0.025722	17.185
172710_x_at	0.34113	0.0011	4.5063	0.015215	9.317	0.093295	0.748896	2.11435	1.98398	33370	col-146	T06E4.6	[GO:0016021] CELLULAR_COMPONENT integral to membrane (IEA)	WBGene00000719	173852_s_at	0.386	0.0085	3.2499	0.043794	17.028	0.422851	0.789586	1.56287	89119.5	tag-135	D1054.15	[GO:0009792] BIOLOGICAL_PROCESS embryonic development ending in birth or egg hatching (IMP) | [GO:0000003] BIOLOGICAL_PROCESS reproduction (IMP) | [GO:0002119] BIOLOGICAL_PROCESS nematode larval development (IMP) | [GO:0040007] BIOLOGICAL_PROCESS growth (IMP) | [GO:0018996] BIOLOGICAL_PROCESS molting cycle, collagen and cuticulin-based cuticle (IMP) | [GO:0040011] BIOLOGICAL_PROCESS locomotion (I…	WBGene00006481	175169_at	0.30011	0.0016	4.4096	0.016409	16.061	0.339171	0.691671	2.7867	2.19565	8047.13	gld-3	T07F8.3			173971_s_at	0.47667	0.0079	4.6376	0.013749	3.226
172723_x_at	0.43319	0	7.6957	0.0018813	8.397	0.496026	0.767949	2.55619	2.38845	436014	col-10	B0222.8	[GO:0016021] CELLULAR_COMPONENT integral to membrane (IEA)	WBGene00000599	173923_at	0.42524	0.0029	3.5716	0.032865	15.643	0.33036	0.627673	1.93774	22875	cids-2	F36A2.1		WBGene00009451	175226_at	0.2418	0.0111	3.2426	0.044088	13.015	0.311351	0.488237	5.07978	2.73612	2866.28	F13E9.1	F13E9.1			174109_at	0.37911	0.0064	3.431	0.037203	17.032
172726_x_at	0.36346	0.0005	4.1482	0.020221	9.189	0.057489	0.685619	1.92204	1.87207	1.14146e+06	col-154	F55C10.2	[GO:0016021] CELLULAR_COMPONENT integral to membrane (IEA) | [GO:0010171] BIOLOGICAL_PROCESS body morphogenesis (IMP) | [GO:0040011] BIOLOGICAL_PROCESS locomotion (IMP) | [GO:0002119] BIOLOGICAL_PROCESS nematode larval development (IMP) | [GO:0040007] BIOLOGICAL_PROCESS growth (IMP) | [GO:0009792] BIOLOGICAL_PROCESS embryonic development ending in birth or egg hatching (IMP)	WBGene00000727	174010_at	0.44178	0.0063	3.4664	0.036053	16.705	0.367414	0.428938	1.83122	16809.2	F19B6.1	F19B6.1	[GO:0005524] MOLECULAR_FUNCTION ATP binding (IEA) | [GO:0016773] MOLECULAR_FUNCTION phosphotransferase activity, alcohol group as acceptor (IEA) | [GO:0005975] BIOLOGICAL_PROCESS carbohydrate metabolic process (IEA) | [GO:0008974] MOLECULAR_FUNCTION phosphoribulokinase activity (IEA) | [GO:0000003] BIOLOGICAL_PROCESS reproduction (IMP) | [GO:0040035] BIOLOGICAL_PROCESS hermaphrodite genitalia dev…	WBGene00008948	175252_at	0.27162	0.0056	3.3262	0.040868	18.297	0.45887	0.953553	3.37862	2.18494	77421.6	mel-26	ZK858.4			174215_s_at	0.48318	0.0026	4.0359	0.022166	4.464
172736_x_at	0.34855	0.0008	3.6775	0.02998	7.059	0.494628	0.893061	2.12049	2.78875	122828	col-167	T10E10.2	[GO:0016021] CELLULAR_COMPONENT integral to membrane (IEA) | [GO:0040010] BIOLOGICAL_PROCESS positive regulation of growth rate (IMP) | [GO:0010171] BIOLOGICAL_PROCESS body morphogenesis (IMP) | [GO:0040011] BIOLOGICAL_PROCESS locomotion (IMP)	WBGene00000740	174025_at	0.44163	0.001	3.6724	0.030113	5.938	0.4116	0.501462	2.78677	2590.39	smd-1	F47G4.7			175296_at	0.22921	0.0125	3.9894	0.023034	15.04	0.291228	0.566583	2.573	2.2663	11848.1	F48A11.4	F48A11.4	[GO:0016021] CELLULAR_COMPONENT integral to membrane (IEA)	WBGene00018585	174254_at	0.33129	0.0134	5.2803	0.0085618	5.961
172746_x_at	0.41139	0.0001	4.4423	0.015993	6.957	0.453146	0.795865	2.70289	3.27426	58905.8	col-166	T07H6.3	[GO:0016021] CELLULAR_COMPONENT integral to membrane (IEA) | [GO:0040010] BIOLOGICAL_PROCESS positive regulation of growth rate (IMP) | [GO:0010171] BIOLOGICAL_PROCESS body morphogenesis (IMP) | [GO:0040011] BIOLOGICAL_PROCESS locomotion (IMP)	WBGene00000739	174109_at	0.27631	0.0124	4.742	0.0127	8.26	0.546948	0.906994	1.83245	3640.79	Y102A5C.6	Y102A5C.6			175409_at	0.29756	0.004	3.2626	0.043292	14.1	0.340922	0.684517	2.55556	2.83218	264.093	C09H10.10	C09H10.10			174590_s_at	0.4372	0.0156	3.8325	0.026266	3.874
172753_x_at	0.38332	0.0001	4.1116	0.020832	8.722	0.276945	0.510686	2.12789	2.0912	872878	col-155	F55C10.3	[GO:0016021] CELLULAR_COMPONENT integral to membrane (IEA) | [GO:0010171] BIOLOGICAL_PROCESS body morphogenesis (IMP) | [GO:0040011] BIOLOGICAL_PROCESS locomotion (IMP) | [GO:0002119] BIOLOGICAL_PROCESS nematode larval development (IMP) | [GO:0040007] BIOLOGICAL_PROCESS growth (IMP) | [GO:0009792] BIOLOGICAL_PROCESS embryonic development ending in birth or egg hatching (IMP)	WBGene00000728	174113_at	0.50477	0.0029	4.5398	0.014824	13.979	0.457134	0.541358	1.66496	6216.92	F26B1.2	F26B1.2			175455_at	0.53486	0	3.9926	0.022973	15.667	0.383102	0.590661	2.86596	1.84013	15837.7	C48B6.3	C48B6.3			174848_s_at	0.1848	0.0155	4.0317	0.022243	5.138
172773_x_at	0.45643	0.0001	3.4769	0.035719	5.63	0.310917	0.564063	3.74225	1.95264	59.074	---	---			174216_at	0.45115	0.0013	3.8406	0.026086	15.571	0.373276	0.581351	1.80813	22094.6	K04F10.7	K04F10.7			175831_s_at	0.21614	0.0163	3.376	0.039076	21.572	0.214503	0.641683	3.36366	5.62153	939.343	nhr-23	C01H6.5			175058_at	0.47059	0.0054	4.74	0.012719	5.822
172801_x_at	0.40473	0.0004	3.6055	0.031907	8.824	0.227139	0.831058	1.9607	1.69934	317110	sqt-3	F23H12.4	[GO:0040002] BIOLOGICAL_PROCESS collagen and cuticulin-based cuticle development (IMP) via [WBPaper00000927] Priess JR et al. (1986) | [GO:0060102] CELLULAR_COMPONENT collagen and cuticulin-based cuticle extracellular matrix (IDA) via [WBPaper00027067] Novelli J et al. (2006) | [GO:0040015] BIOLOGICAL_PROCESS negative regulation of multicellular organism growth (IMP) | [GO:0010171] BIOLOGICAL_PRO…	WBGene00005018	174753_at	0.46093	0.0064	3.9779	0.023255	12.495	0.417506	0.517383	1.51372	3090.45	D1044.6	D1044.6			175832_s_at	0.49265	0	3.4094	0.037926	15.722	0.449601	0.681578	3.38282	1.76142	3548.98	ego-1	F26A3.3	[GO:0001584] MOLECULAR_FUNCTION rhodopsin-like receptor activity (IEA) | [GO:0007186] BIOLOGICAL_PROCESS G-protein coupled receptor protein signaling pathway (IEA) | [GO:0016021] CELLULAR_COMPONENT integral to membrane (IEA) | [GO:0040010] BIOLOGICAL_PROCESS positive regulation of growth rate (IMP) | [GO:0009792] BIOLOGICAL_PROCESS embryonic development ending in birth or egg hatching (IMP) | [GO…	WBGene00001214	175177_s_at	0.5061	0.0012	4.558	0.014617	17.546
172862_x_at	0.32647	0.0008	5.0737	0.0099322	6.922	0.187589	0.61926	1.92241	2.0841	668902	col-117	T28C6.4	[GO:0016021] CELLULAR_COMPONENT integral to membrane (IEA) | [GO:0010171] BIOLOGICAL_PROCESS body morphogenesis (IMP) | [GO:0040011] BIOLOGICAL_PROCESS locomotion (IMP) | [GO:0002119] BIOLOGICAL_PROCESS nematode larval development (IMP) | [GO:0040007] BIOLOGICAL_PROCESS growth (IMP) | [GO:0009792] BIOLOGICAL_PROCESS embryonic development ending in birth or egg hatching (IMP) | [GO:0040010] BIOLOG…	WBGene00000691	174812_at	0.4027	0.0014	3.9608	0.023587	5.726	0.419248	0.568091	3.19215	39244.7	C49F5.1	C49F5.1			176111_at	0.34351	0.0005	3.1929	0.04614	8.079	0.0407687	0.155384	3.08748	1.93798	212.993	exc-4	Y105E8A.22			175228_at	0.38712	0.0036	3.7118	0.029109	7.119
172895_x_at	0.31805	0.0022	3.2342	0.044428	9.952	0.108383	0.707301	1.74786	1.92869	523291	dpy-13	F30B5.1	[GO:0044420] CELLULAR_COMPONENT extracellular matrix part (IDA) via [WBPaper00005815] McMahon L et al. (2003) | [GO:0010171] BIOLOGICAL_PROCESS body morphogenesis (IMP) | [GO:0016021] CELLULAR_COMPONENT integral to membrane (IEA) | [GO:0040011] BIOLOGICAL_PROCESS locomotion (IMP)	WBGene00001074	174930_at	0.40669	0.0065	3.879	0.025257	5.197	0.415024	0.720894	2.29978	4041.72	pes-22	K05B2.5			176196_at	0.5176	0	3.2824	0.042521	16.805	0.502283	0.613774	5.53565	3.59965	1401.25	fbxa-27	Y82E9BL.17			176072_at	0.42333	0.0013	4.5112	0.015157	6.5
172898_x_at	0.37688	0.0005	3.2596	0.043411	18.988	0.255829	0.616706	3.64537	2.34644	11908	EEED8.12	EEED8.12	[GO:0003676] MOLECULAR_FUNCTION nucleic acid binding (IEA) | [GO:0000166] MOLECULAR_FUNCTION nucleotide binding (IEA)	WBGene00017140	174945_at	0.42862	0.0123	5.0676	0.0099761	14.195	0.491944	0.694804	2.13228	4662.48	C18A3.5	C18A3.5			176252_at	0.23618	0.0131	3.4065	0.038027	20.799	0.147457	0.480495	3.47678	2.51896	205.768	K02D10.4	K02D10.4		WBGene00019304	176090_at	0.43841	0.0039	3.7625	0.027873	6.862
172984_s_at	0.28274	0.0043	4.0579	0.021769	9.917	0.0835488	0.891886	3.28897	2.61819	3431.8	kel-8	W02G9.2	[GO:0043005] CELLULAR_COMPONENT neuron projection (IDA) via [WBPaper00027017] Schaefer H et al. (2006) | [GO:0043025] CELLULAR_COMPONENT cell soma (IDA) via [WBPaper00027017] Schaefer H et al. (2006) | [GO:0014069] CELLULAR_COMPONENT postsynaptic density (IDA) via [WBPaper00027017] Schaefer H et al. (2006) | [GO:0005515] MOLECULAR_FUNCTION protein binding (IEA)	WBGene00020952	175304_at	0.38575	0.0139	4.2063	0.019293	14.62	0.414946	0.527709	1.60302	2355.38	F07H5.10	F07H5.10		WBGene00008561	176675_at	0.31986	0.0017	3.4895	0.035322	19.125	0.157124	0.390981	9.94444	3.97008	80388.9	F43H9.4	F43H9.4		WBGene00018400	176411_s_at	0.40041	0.0065	3.7304	0.028647	6.452
172988_s_at	0.42688	0	6.5885	0.0036005	8.581	0.0605095	0.528268	2.78071	2.27657	1102.31	C09E8.1	C09E8.1	[GO:0005328] MOLECULAR_FUNCTION neurotransmitter:sodium symporter activity (IEA) | [GO:0005887] CELLULAR_COMPONENT integral to plasma membrane (IEA) | [GO:0006836] BIOLOGICAL_PROCESS neurotransmitter transport (IEA) | [GO:0016020] CELLULAR_COMPONENT membrane (IEA) | [GO:0016021] CELLULAR_COMPONENT integral to membrane (IEA)	WBGene00015644	175467_at	0.41324	0.0018	3.2989	0.04189	14.98	0.307286	0.431817	1.8528	12497.4	---	---			176730_at	0.27437	0.0052	3.5998	0.032066	17.641	0.330756	0.553875	2.89295	2.58273	135314	Y111B2A.2	Y111B2A.2	[GO:0016021] CELLULAR_COMPONENT integral to membrane (IEA)	WBGene00013728	176469_s_at	0.41972	0.0007	5.2942	0.0084782	6.98
173008_s_at	0.47502	0	7.6802	0.0018976	7.277	0.508526	0.691345	5.69281	2.16575	403.102	---	---			175596_at	0.55621	0.0006	6.9708	0.0028551	10.511	0.605598	0.730441	2.03633	32.1738	pif-1	Y18H1A.6		WBGene00004028	177103_at	0.27565	0.0037	3.1476	0.048105	21.109	0.312219	0.345539	8.18174	3.10852	3409.29	Y61A9LA.1	Y61A9LA.1	[GO:0004181] MOLECULAR_FUNCTION metallocarboxypeptidase activity (IEA) | [GO:0006508] BIOLOGICAL_PROCESS proteolysis (IEA) | [GO:0008270] MOLECULAR_FUNCTION zinc ion binding (IEA) | [GO:0005215] MOLECULAR_FUNCTION transporter activity (IEA) | [GO:0006810] BIOLOGICAL_PROCESS transport (IEA) | [GO:0016021] CELLULAR_COMPONENT integral to membrane (IEA)	WBGene00022014	176728_s_at	0.34632	0.015	3.6797	0.029923	5.282
173045_at	0.43402	0.0001	5.5053	0.0073123	7.571	0.224987	0.41052	4.66383	2.34103	22082.6	fpn-1.1	Y37E3.16	[GO:0005381] MOLECULAR_FUNCTION iron ion transmembrane transporter activity (IEA) | [GO:0006826] BIOLOGICAL_PROCESS iron ion transport (IEA) | [GO:0016021] CELLULAR_COMPONENT integral to membrane (IEA)	WBGene00021354	175657_s_at	0.43175	0.0025	4.649	0.01363	2.966	0.431693	0.615966	3.76821	244.179	bli-3	F56C11.1	[GO:0005882] CELLULAR_COMPONENT intermediate filament (IDA) via [WBPaper00004841] Edens WA et al. (2001) | [GO:0040002] BIOLOGICAL_PROCESS collagen and cuticulin-based cuticle development (IMP) | [GO:0004601] MOLECULAR_FUNCTION peroxidase activity (IEA) | [GO:0006979] BIOLOGICAL_PROCESS response to oxidative stress (IEA) | [GO:0020037] MOLECULAR_FUNCTION heme binding (IEA) | [GO:0005509] MOLECULA…	WBGene00000253	177353_s_at	0.53055	0	8.3144	0.0013458	19.044	0.319114	0.582992	6.68041	11.3872	5408.91	clec-190	M199.4		WBGene00010953	176729_at	0.33734	0.0048	3.5451	0.033636	18.725
173122_s_at	0.51706	0.0001	7.9863	0.0016037	6.714	0.502392	0.774491	2.99122	1.96211	7801.67	T04B8.5	T04B8.5	[GO:0006810] BIOLOGICAL_PROCESS transport (IEA) | [GO:0016020] CELLULAR_COMPONENT membrane (IEA) | [GO:0016021] CELLULAR_COMPONENT integral to membrane (IEA)	WBGene00020207	175951_s_at	0.49771	0.0032	5.0763	0.0099137	3.741	0.528323	0.699236	1.68522	1355.63	tag-250	C29E4.5	[GO:0003676] MOLECULAR_FUNCTION nucleic acid binding (IEA)	WBGene00016203	177462_at	0.40025	0.0001	4.4394	0.016029	1.802	0.0195339	0.366008	2.06541	4.0509	52.8219	T19C4.1	T19C4.1			176790_at	0.39706	0.0173	4.9432	0.010929	17.518
173153_s_at	0.30555	0.0031	3.6636	0.030342	8.259	0.0857683	0.328294	3.66586	1.88777	28203.3	W04B5.3	W04B5.3	[GO:0005529] MOLECULAR_FUNCTION sugar binding (IEA)	WBGene00021020	175997_s_at	0.51862	0.0023	4.9279	0.011052	5.53	0.410482	0.847362	1.82422	5980.24	Y105E8A.19	Y105E8A.19	[GO:0000166] MOLECULAR_FUNCTION nucleotide binding (IEA) | [GO:0004812] MOLECULAR_FUNCTION aminoacyl-tRNA ligase activity (IEA) | [GO:0005524] MOLECULAR_FUNCTION ATP binding (IEA) | [GO:0005737] CELLULAR_COMPONENT cytoplasm (IEA) | [GO:0006412] BIOLOGICAL_PROCESS translation (IEA) | [GO:0006418] BIOLOGICAL_PROCESS tRNA aminoacylation for protein translation (IEA) | [GO:0004831] MOLECULAR_FUNCTION…	WBGene00013677	177634_at	0.28669	0.0018	4.0066	0.022708	14.996	0.14991	0.762269	1.36297	1.72738	19.9797	F08A8.5	F08A8.5			177183_s_at	0.22303	0.0164	6.5541	0.003678	17.804
173174_s_at	0.36768	0.0006	3.7746	0.027587	7.987	0.161636	0.327794	4.42998	3.29302	2392.64	H06I04.6	H06I04.6		WBGene00019170	176073_at	0.53553	0.0008	3.5115	0.034646	1.585	0.390694	0.590055	1.96181	33.0136	ZK370.6	ZK370.6		WBGene00022720	178262_at	0.27095	0.0049	3.9624	0.023555	11.614	0.207844	0.61561	27.7793	145.909	1952.94	F01D5.5	F01D5.5		WBGene00008495	177492_at	0.56635	0.0036	3.7116	0.029114	17.009
173236_at	0.57387	0	6.0127	0.0051947	18.274	0.573167	0.765404	2.29665	1.89499	6027.83	Y67H2A.2	Y67H2A.2		WBGene00013461	176138_at	0.37801	0.0034	4.5189	0.015067	3.889	0.459921	0.595555	1.6618	553.259	fbxa-76	Y119D3B.22		WBGene00044675	178428_at	0.29246	0.0024	3.287	0.042343	13.143	0.0366965	0.528712	6.69541	2.83207	52.0464	W06D4.3	W06D4.3			177975_at	0.57356	0.0004	4.4277	0.016178	5.607
173383_s_at	0.44848	0	3.3582	0.039708	16.195	0.526788	0.668653	4.36203	1.85628	28246.7	T01B7.5	T01B7.5	[GO:0006364] BIOLOGICAL_PROCESS rRNA processing (IEA) | [GO:0032040] CELLULAR_COMPONENT small-subunit processome (IEA) | [GO:0040010] BIOLOGICAL_PROCESS positive regulation of growth rate (IMP) | [GO:0018991] BIOLOGICAL_PROCESS oviposition (IMP) | [GO:0008406] BIOLOGICAL_PROCESS gonad development (IMP) | [GO:0000003] BIOLOGICAL_PROCESS reproduction (IMP) | [GO:0002119] BIOLOGICAL_PROCESS nematode…	WBGene00011311	176788_at	0.4205	0.0058	5.0549	0.010069	7.333	0.520167	0.724478	1.67893	5642.11	Y51H7C.4	Y51H7C.4		WBGene00021782	178918_at	0.24054	0.0099	3.5868	0.032432	7.283	0.235207	0.616526	6.38682	5.7254	82.4614	T06D8.1	T06D8.1			178059_s_at	0.38222	0.0056	4.3581	0.01709	18.827
173396_s_at	0.3457	0.0015	4.0431	0.022036	16.903	0.315488	0.489334	1.60819	1.61067	177965	pabp-2	C17E4.5	[GO:0003676] MOLECULAR_FUNCTION nucleic acid binding (IEA) | [GO:0000166] MOLECULAR_FUNCTION nucleotide binding (IEA) | [GO:0040019] BIOLOGICAL_PROCESS positive regulation of embryonic development (IMP) | [GO:0009792] BIOLOGICAL_PROCESS embryonic development ending in birth or egg hatching (IMP) | [GO:0002119] BIOLOGICAL_PROCESS nematode larval development (IMP) | [GO:0040007] BIOLOGICAL_PROCESS …	WBGene00003904	177031_at	0.4147	0.0101	8.2333	0.0014048	3.94	0.597614	0.86961	2.2778	1109.38	Y48G9A.3	Y48G9A.3	[GO:0005488] MOLECULAR_FUNCTION binding (IEA)	WBGene00021697	179004_at	0.30939	0.0021	3.2417	0.044122	20.992	0.512377	0.647876	4.34624	5.9959	2330.06	T28A8.5	T28A8.5			178125_at	0.39617	0.0194	4.9366	0.010982	13.345
173753_s_at	0.35797	0.0012	4.7952	0.012201	20.288	0.344001	0.577277	1.85228	1.60299	230937	tag-349	Y73F8A.34	[GO:0008270] MOLECULAR_FUNCTION zinc ion binding (IEA)	WBGene00013538	177710_s_at	0.49429	0.0012	4.4913	0.015393	12.466	0.461434	0.688679	1.6566	7636.48	C30H6.9	C30H6.9	[GO:0016021] CELLULAR_COMPONENT integral to membrane (IEA)	WBGene00007826	179146_at	0.27912	0.0025	3.6921	0.029606	21.989	0.0618928	0.487357	2.18243	3.2135	3710.72	T28A8.4	T28A8.4			178282_at	0.48555	0.0007	7.1979	0.0024977	6.186
173809_s_at	0.36968	0.0007	3.5538	0.033383	18.849	0.20059	0.556289	1.9465	1.62269	146576	C07A9.2	C07A9.2	[GO:0005634] CELLULAR_COMPONENT nucleus (IEA) | [GO:0009792] BIOLOGICAL_PROCESS embryonic development ending in birth or egg hatching (IMP) | [GO:0000003] BIOLOGICAL_PROCESS reproduction (IMP) | [GO:0002119] BIOLOGICAL_PROCESS nematode larval development (IMP) | [GO:0040007] BIOLOGICAL_PROCESS growth (IMP) | [GO:0040035] BIOLOGICAL_PROCESS hermaphrodite genitalia development (IMP) | [GO:0040011] …	WBGene00007400	177973_at	0.40079	0.02	7.5664	0.0020225	15.861	0.61726	0.65763	1.9267	16156.2	C06A1.4	C06A1.4			179424_at	0.38147	0.0003	5.1375	0.0094838	23.058	0.0161607	0.404325	2.49731	1.84856	671061	spp-18	F27C8.4		WBGene00005003	178378_at	0.56721	0.0012	4.2011	0.019373	5.016
173843_s_at	0.29513	0.002	3.1669	0.047254	8.451	0.0585803	0.202635	4.22116	1.92625	4453.02	kgb-1	T07A9.3	[GO:0007143] BIOLOGICAL_PROCESS female meiosis (IMP) via [WBPaper00005583] Smith P et al. (2002) | [GO:0007140] BIOLOGICAL_PROCESS male meiosis (IMP) via [WBPaper00005583] Smith P et al. (2002) | [GO:0001556] BIOLOGICAL_PROCESS oocyte maturation (IMP) via [WBPaper00005583] Smith P et al. (2002) | [GO:0000003] BIOLOGICAL_PROCESS reproduction (IMP) via [WBPaper00005583] Smith P et al. (2002) | [GO:…	WBGene00002187	178043_at	0.46223	0.0011	3.3427	0.040263	3.232	0.378431	0.577679	1.87077	1483.9	sqrd-1	F02H6.5		WBGene00008538	179695_at	0.36218	0.0007	4.4519	0.015873	13.937	0.272428	0.774402	4.99403	6.83118	120058	F35E12.5	F35E12.5			178515_s_at	0.43697	0.0102	3.3396	0.040376	2.949
173955_at	0.47737	0	3.5199	0.03439	18.481	0.463499	0.795434	6.1008	1.95505	15218.6	C15C8.4	C15C8.4	[GO:0005783] CELLULAR_COMPONENT endoplasmic reticulum (IEA) | [GO:0008201] MOLECULAR_FUNCTION heparin binding (IEA) | [GO:0050750] MOLECULAR_FUNCTION low-density lipoprotein receptor binding (IEA) | [GO:0040010] BIOLOGICAL_PROCESS positive regulation of growth rate (IMP)	WBGene00007606	178096_s_at	0.4212	0.0086	3.5777	0.032692	13.795	0.292096	0.684267	2.22265	8949.31	ZC168.3	ZC168.3	[GO:0009792] BIOLOGICAL_PROCESS embryonic development ending in birth or egg hatching (IMP) | [GO:0040035] BIOLOGICAL_PROCESS hermaphrodite genitalia development (IMP) | [GO:0000003] BIOLOGICAL_PROCESS reproduction (IMP) | [GO:0002009] BIOLOGICAL_PROCESS morphogenesis of an epithelium (IMP) | [GO:0040011] BIOLOGICAL_PROCESS locomotion (IMP) | [GO:0002119] BIOLOGICAL_PROCESS nematode larval develo…	WBGene00013857	179792_at	0.3774	0.0001	5.3751	0.0080077	16.161	0.252625	0.502375	3.14696	4.18038	8761.18	F53A3.7	F53A3.7	[GO:0009792] BIOLOGICAL_PROCESS embryonic development ending in birth or egg hatching (IMP) | [GO:0000003] BIOLOGICAL_PROCESS reproduction (IMP) | [GO:0010171] BIOLOGICAL_PROCESS body morphogenesis (IMP)	WBGene00018723	178555_at	0.15892	0.01	3.744	0.028316	14.962
174035_s_at	0.43413	0	4.5897	0.014264	15.337	0.295311	0.606575	2.44852	2.45296	141.945	cogc-2	C06G3.10	[GO:0030334] BIOLOGICAL_PROCESS regulation of cell migration (IMP) via [WBPaper00026979] Kubota Y et al. (2005) | [GO:0035262] BIOLOGICAL_PROCESS gonad morphogenesis (IMP) via [WBPaper00026979] Kubota Y et al. (2005) | [GO:0007030] BIOLOGICAL_PROCESS Golgi organization and biogenesis (IEA) | [GO:0015031] BIOLOGICAL_PROCESS protein transport (IEA) | [GO:0016020] CELLULAR_COMPONENT membrane (IEA) |…	WBGene00000585	178727_s_at	0.40175	0.0104	4.4756	0.015582	13.235	0.419009	0.69523	2.02115	7820.69	F54D5.9	F54D5.9	[GO:0009792] BIOLOGICAL_PROCESS embryonic development ending in birth or egg hatching (IMP)	WBGene00010053	181340_at	0.36853	0.0005	4.0124	0.022601	10.851	0.200484	0.580487	12.1027	26.3067	279.316	pho-4	T16D1.2	[GO:0003993] MOLECULAR_FUNCTION acid phosphatase activity (IEA)	WBGene00004023	178635_at	0.50462	0.0049	4.146	0.020258	6.104
174094_at	0.43491	0	4.6207	0.013929	8.778	0.180931	0.671401	2.93189	2.1895	33915.7	sca-1	K11D9.2			178792_at	0.44591	0.0014	5.0602	0.01003	16.609	0.479171	0.674391	3.85489	78.0921	R09A8.2	R09A8.2		WBGene00011153	181668_at	0.36909	0.0001	3.7035	0.029316	3.147	0.0654364	0.486788	1.59942	2.08333	212.474	F25F8.1	F25F8.1		WBGene00017795	178752_at	0.26067	0.015	5.3097	0.0083854	16.946
174102_at	0.24116	0.0099	3.6821	0.029861	9.231	0.147333	0.49002	4.8114	2.21626	7442.94	Y54G2A.14	Y54G2A.14			179444_s_at	0.38469	0.0079	3.1612	0.047506	16.681	0.267247	0.671817	2.2444	38879.6	F11E6.7	F11E6.7		WBGene00008710	182153_at	0.22836	0.0157	3.1938	0.046101	10.24	0.516704	0.793281	2.90358	5.20518	43.0608	R13A1.5	R13A1.5		WBGene00020043	179052_s_at	0.40185	0.0163	3.7255	0.028768	4.147
174251_s_at	0.41679	0.0001	3.8955	0.024908	7.873	0.421646	0.75335	2.69091	2.40986	476.982	Y54G2A.4	Y54G2A.4	[GO:0016021] CELLULAR_COMPONENT integral to membrane (IEA)	WBGene00021870	179485_s_at	0.46348	0.0012	4.1733	0.019814	15.975	0.422559	0.448212	1.56167	32412.2	sun-1	F57B1.2	[GO:0009792] BIOLOGICAL_PROCESS embryonic development ending in birth or egg hatching (IMP) via [WBPaper00006310] Malone CJ et al. (2003) | [GO:0051642] BIOLOGICAL_PROCESS centrosome localization (IMP) via [WBPaper00006310] Malone CJ et al. (2003) | [GO:0008104] BIOLOGICAL_PROCESS protein localization (IMP) via [WBPaper00006310] Malone CJ et al. (2003) | [GO:0005635] CELLULAR_COMPONENT nuclear en…	WBGene00006311	182553_at	0.38728	0.0001	3.694	0.029557	9.567	0.537761	0.807517	6.75135	10.2763	70371	C54D10.3	C54D10.3		WBGene00008298	179217_s_at	0.30713	0.0052	4.3386	0.017355	4.68
174274_at	0.23353	0.014	4.8722	0.011518	21.853	0.171622	0.519189	4.19566	3.13673	253.128	ced-3	C48D1.2			179786_at	0.44948	0.0018	5.1598	0.0093325	22.13	0.506336	0.618679	2.78697	29352	C08E8.4	C08E8.4	[GO:0008152] BIOLOGICAL_PROCESS metabolic process (IEA) | [GO:0016491] MOLECULAR_FUNCTION oxidoreductase activity (IEA)	WBGene00007440	182922_s_at	0.266	0.0058	5.7318	0.0062627	5.542	0.095501	0.175202	3.63945	2.85993	8479.23	C04F12.1	C04F12.1	[GO:0006952] BIOLOGICAL_PROCESS defense response (IMP)	WBGene00007297	179231_at	0.62182	0.001	6.2039	0.0045882	5.122
174292_at	0.34535	0.0017	3.5371	0.033873	19.213	0.103832	0.183521	2.20132	2.31256	6233.98	T21C9.1	T21C9.1			180360_at	0.464	0.0072	3.7945	0.027124	2.605	0.441632	0.560084	1.58016	11.7854	C52E2.5	C52E2.5		WBGene00016884	182970_at	0.31039	0.002	4.7596	0.012532	17.46	0.213876	0.460373	9.68956	2.92177	36958.2	F55G11.4	F55G11.4		WBGene00010124	179434_at	0.44845	0.0107	3.1904	0.046245	17.184
174298_s_at	0.32251	0.0022	3.6214	0.03147	9.213	0.16333	0.788053	1.70311	1.66887	38848	pyp-1	C47E12.4	[GO:0000287] MOLECULAR_FUNCTION magnesium ion binding (IEA) | [GO:0004427] MOLECULAR_FUNCTION inorganic diphosphatase activity (IEA) | [GO:0005737] CELLULAR_COMPONENT cytoplasm (IEA) | [GO:0006796] BIOLOGICAL_PROCESS phosphate metabolic process (IEA) | [GO:0016021] CELLULAR_COMPONENT integral to membrane (IEA) | [GO:0040010] BIOLOGICAL_PROCESS positive regulation of growth rate (IMP) | [GO:000979…	WBGene00008149	180535_at	0.57897	0.001	4.6399	0.013725	6.7	0.469822	0.57026	2.64333	645.853	flp-5	C03G5.7		WBGene00001448	183014_at	0.26813	0.0047	3.8933	0.024955	14.918	0.454635	0.828267	4.39459	6.46423	773.941	F59A7.2	F59A7.2		WBGene00019090	179498_at	0.33766	0.0051	4.1454	0.020267	5.423
174393_at	0.42928	0	3.6562	0.030536	7.378	0.227841	0.484562	4.72518	2.35159	40678.7	H40L08.2	H40L08.2			180758_at	0.48922	0.0019	4.0011	0.022811	6.317	0.417838	0.464826	2.68603	229.596	nlp-6	T23E7.4	[GO:0016021] CELLULAR_COMPONENT integral to membrane (IEA)	WBGene00003744	183566_at	0.46034	0	7.9215	0.0016613	3.02	0.322706	0.730094	6.54014	9.29166	14464.7	C14C6.2	C14C6.2		WBGene00015756	179572_at	0.52879	0.0025	4.2277	0.018963	4.779
174449_at	0.28578	0.0039	4.2844	0.01812	8.619	0.0164251	0.23218	2.23189	2.03092	1277.42	hlh-11	F58A4.7			181045_at	0.49381	0.0032	4.5104	0.015166	4.871	0.404607	0.902264	1.86564	15.3974	unc-44	B0350.2	[GO:0016328] CELLULAR_COMPONENT lateral plasma membrane (IDA) via [WBPaper00004127] Moorthy S et al. (2000) | [GO:0040018] BIOLOGICAL_PROCESS positive regulation of multicellular organism growth (IMP) | [GO:0040011] BIOLOGICAL_PROCESS locomotion (IMP) | [GO:0005515] MOLECULAR_FUNCTION protein binding (IEA) | [GO:0007165] BIOLOGICAL_PROCESS signal transduction (IEA) | [GO:0004553] MOLECULAR_FUNCTI…	WBGene00006780	183567_s_at	0.49155	0	5.8577	0.0057554	3.983	0.451708	0.81279	7.437	8.569	6369.81	C14C6.2	C14C6.2		WBGene00015756	179780_s_at	0.31645	0.011	4.1667	0.01992	7.518
174473_at	0.25375	0.0075	3.6254	0.031361	9.283	0.0109676	0.535865	2.68819	2.1552	5530.05	ZK470.2	ZK470.2			181499_s_at	0.43134	0.0092	4.1054	0.020938	17.54	0.434978	0.49571	1.65936	5562.57	F26F4.5	F26F4.5		WBGene00017827	183792_s_at	0.34057	0.0007	3.9862	0.023095	19.365	0.468355	0.602682	3.05861	3.92668	135.938	F34D10.9	F34D10.9			179808_at	0.47627	0.0059	4.828	0.011905	16.038
174548_at	0.48991	0	10.9888	0.00037886	7.697	0.384602	0.578517	5.15773	2.44814	45361.3	ifc-2	M6.1			182247_s_at	0.4315	0.0124	5.597	0.0068646	13.719	0.479784	0.81759	1.77085	12093.3	W02A11.1	W02A11.1	[GO:0000003] BIOLOGICAL_PROCESS reproduction (IMP) | [GO:0040010] BIOLOGICAL_PROCESS positive regulation of growth rate (IMP) | [GO:0040035] BIOLOGICAL_PROCESS hermaphrodite genitalia development (IMP)	WBGene00012192	184162_at	0.48951	0	7.0082	0.0027924	2.116	0.344322	0.577355	2.42	2.10655	464.347	dpy-2	T14B4.6	[GO:0040014] BIOLOGICAL_PROCESS regulation of multicellular organism growth (IMP) via [WBPaper00001792] Levy AD et al. (1993) | [GO:0040032] BIOLOGICAL_PROCESS post-embryonic body morphogenesis (IMP) via [WBPaper00001792] Levy AD et al. (1993) | [GO:0005581] CELLULAR_COMPONENT collagen (ISS) via [WBPaper00001792] Levy AD et al. (1993) | [GO:0042329] MOLECULAR_FUNCTION structural constituent of co…	WBGene00001064	179908_at	0.39284	0.0183	3.8098	0.026774	16.076
174588_at	0.43948	0	3.7679	0.027746	8.047	0.191759	0.784294	4.42777	3.57456	2067.47	gei-3	T22H6.6			183388_at	0.44286	0.0018	3.5186	0.03443	9.374	0.402311	0.571277	1.66394	322.963	F23B12.4	F23B12.4	[GO:0010171] BIOLOGICAL_PROCESS body morphogenesis (IMP)	WBGene00009081	184845_at	0.36931	0.0003	7.7478	0.0018276	6.21	0.0431893	0.514909	3.0677	1.9681	26785.1	F53E10.1	F53E10.1		WBGene00018758	179927_at	0.44331	0.0136	3.9048	0.024715	4.593
174713_at	0.44546	0.0001	5.096	0.009773	3.627	0.341957	0.682811	2.35694	1.78489	71014.4	mrp-5	F14F4.3			183550_at	0.38022	0.0041	3.9505	0.02379	7.765	0.450114	0.667687	2.17168	14638.4	C46G7.1	C46G7.1	[GO:0016021] CELLULAR_COMPONENT integral to membrane (IEA) | [GO:0040010] BIOLOGICAL_PROCESS positive regulation of growth rate (IMP) | [GO:0002119] BIOLOGICAL_PROCESS nematode larval development (IMP) | [GO:0040011] BIOLOGICAL_PROCESS locomotion (IMP)	WBGene00016721	185484_at	0.35905	0.0004	3.5475	0.033567	14.702	0.2481	0.458877	3.70867	4.83915	291.27	bath-7	F52C6.10			179931_s_at	0.5018	0.0028	4.0565	0.021793	19.542
174764_at	0.33066	0.0009	4.3449	0.017269	8.709	0.222373	0.51584	2.49805	1.99656	12725.4	rskn-2	C54G4.1			183569_at	0.58896	0.0002	5.5159	0.0072588	6.695	0.526328	0.590064	2.67685	963.219	C33G8.4	C33G8.4		WBGene00016362	185777_s_at	0.25302	0.0071	3.483	0.035529	20.156	0.0244185	0.493423	2.1727	2.09539	909.813	Y53F4B.4	Y53F4B.4		WBGene00013151	179967_s_at	0.43115	0.0022	4.737	0.012748	7.27
174770_at	0.35576	0.0006	3.6383	0.031012	7.545	0.087163	0.162448	3.25489	1.92985	3256.43	gei-16	T17H7.4			183707_s_at	0.44842	0.0013	3.7882	0.027269	15.304	0.346636	0.556636	1.81005	8950.12	ZK973.9	ZK973.9		WBGene00022835	186534_at	0.30312	0.0014	4.8973	0.011306	13.729	0.434768	0.750063	1.41	1.60947	48.2563	Y116A8C.25	Y116A8C.25			180145_s_at	0.4294	0.0017	7.8146	0.0017615	6.119
175020_at	0.43795	0	4.3922	0.016635	8.557	0.0636173	0.252676	3.33009	1.88244	76409.4	ifb-1	F10C1.2	[GO:0005198] MOLECULAR_FUNCTION structural molecule activity (IEA) | [GO:0009792] BIOLOGICAL_PROCESS embryonic development ending in birth or egg hatching (IMP) | [GO:0008340] BIOLOGICAL_PROCESS determination of adult life span (IMP) | [GO:0018996] BIOLOGICAL_PROCESS molting cycle, collagen and cuticulin-based cuticle (IMP) | [GO:0040011] BIOLOGICAL_PROCESS locomotion (IMP) | [GO:0002119] BIOLOGI…	WBGene00002053	184587_s_at	0.30667	0.0138	3.6171	0.031589	5.576	0.394224	0.606465	2.20851	21212.7	spl-1	Y66H1B.4	[GO:0016831] MOLECULAR_FUNCTION carboxy-lyase activity (IEA) | [GO:0019752] BIOLOGICAL_PROCESS carboxylic acid metabolic process (IEA) | [GO:0030170] MOLECULAR_FUNCTION pyridoxal phosphate binding (IEA) | [GO:0003824] MOLECULAR_FUNCTION catalytic activity (IEA) | [GO:0016021] CELLULAR_COMPONENT integral to membrane (IEA) | [GO:0040010] BIOLOGICAL_PROCESS positive regulation of growth rate (IMP)	WBGene00004981	186643_at	0.26199	0.0043	3.3181	0.041165	17.423	0.119826	0.30736	2.24926	1.63084	720.57	him-19	Y95B8A.11			180625_at	0.64489	0.0003	8.6583	0.0011258	16.5
175151_at	0.29313	0.0038	5.5421	0.0071287	9.013	0.00108098	0.321388	3.99847	2.0415	15817.1	F53C11.1	F53C11.1		WBGene00009971	185017_at	0.39758	0.0131	5.3172	0.0083412	4.429	0.539657	0.655104	2.48755	276.681	C49H3.12	C49H3.12		WBGene00016795	187018_at	0.30405	0.0018	4.2721	0.018299	15.545	0.253272	0.467586	3.43841	4.85938	50697.9	Y55B1AL.2	Y55B1AL.2	[GO:0003677] MOLECULAR_FUNCTION DNA binding (IEA) | [GO:0006289] BIOLOGICAL_PROCESS nucleotide-excision repair (IEA)	WBGene00021904	180707_at	0.53245	0.0023	3.8381	0.026141	18.365
175347_s_at	0.38379	0.0006	4.6139	0.014001	8.926	0.0839764	0.531446	3.03018	2.52949	10269.3	haf-4	W04C9.1	[GO:0006629] BIOLOGICAL_PROCESS lipid metabolic process (IMP) via [WBPaper00028970] Schroeder LK et al. (2007) | [GO:0005524] MOLECULAR_FUNCTION ATP binding (IEA) | [GO:0006810] BIOLOGICAL_PROCESS transport (IEA) | [GO:0016021] CELLULAR_COMPONENT integral to membrane (IEA) | [GO:0042626] MOLECULAR_FUNCTION ATPase activity, coupled to transmembrane movement of substances (IEA) | [GO:0016887] MOLEC…	WBGene00001814	185419_at	0.42638	0.0039	7.162	0.0025506	3.505	0.62552	0.692435	1.54551	12538.3	abcf-3	F42A10.1	[GO:0005524] MOLECULAR_FUNCTION ATP binding (IEA) | [GO:0016887] MOLECULAR_FUNCTION ATPase activity (IEA) | [GO:0000166] MOLECULAR_FUNCTION nucleotide binding (IEA) | [GO:0017111] MOLECULAR_FUNCTION nucleoside-triphosphatase activity (IEA)	WBGene00018339	187103_s_at	0.34412	0.0005	3.8235	0.026466	10.701	0.0432842	0.17651	2.15781	1.75719	187.128	Y113G7B.11	Y113G7B.11			181010_s_at	0.30027	0.009	4.62	0.013936	4.238
175392_at	0.38641	0.0001	3.8472	0.025941	19.504	0.124417	0.375113	1.81306	1.80156	12111.3	F09E5.7	F09E5.7			185570_s_at	0.4459	0.0072	3.2694	0.043024	17.551	0.309251	0.487594	1.66221	3646.56	Y105E8A.2	Y105E8A.2	[GO:0005515] MOLECULAR_FUNCTION protein binding (IEA)	WBGene00013667	187234_s_at	0.42201	0.0004	4.9824	0.010617	9.308	0.503498	0.615363	8.80182	25.4314	2614.56	Y110A2AL.9	Y110A2AL.9			181096_at	0.20258	0.0018	4.1671	0.019914	4.685
175442_at	0.36599	0.0006	3.4087	0.037949	14.583	0.150385	0.571574	3.31143	1.86646	17870.9	R05F9.9	R05F9.9		WBGene00019892	186020_s_at	0.45577	0.0084	7.8714	0.0017074	1.579	0.618732	0.861213	1.7248	8366.44	cls-2	R107.6	[GO:0016482] BIOLOGICAL_PROCESS cytoplasmic transport (IMP) via [WBPaper00006026] Yang H et al. (2003) | [GO:0051306] BIOLOGICAL_PROCESS mitotic sister chromatid separation (IMP) via [WBPaper00025100] Cheeseman IM et al. (2005) | [GO:0000910] BIOLOGICAL_PROCESS cytokinesis (IMP) via [WBPaper00028955] Bringmann H et al. (2006) | [GO:0031134] BIOLOGICAL_PROCESS sister chromatid biorientation (IMP) …	WBGene00000549	187309_at	0.20683	0.0128	3.2606	0.04337	14.473	0.0713807	0.728385	2.52981	1.53937	20.5596	ZK1128.3	ZK1128.3			181202_at	0.13869	0.0185	4.4504	0.015892	15.788
175452_at	0.27069	0.0034	4.0066	0.022708	6.417	0.346225	0.565242	7.63606	2.67735	4778.23	M176.5	M176.5		WBGene00010944	186078_at	0.43836	0.0043	4.5595	0.0146	13.513	0.458559	0.59044	1.9701	3461.67	Y17G9B.9	Y17G9B.9	[GO:0009792] BIOLOGICAL_PROCESS embryonic development ending in birth or egg hatching (IMP)	WBGene00021206	187643_at	0.48376	0	2.4428	0.045163	22.678	0.522808	0.773351	5.95775	9.8297	113.735	F23F12.3	F23F12.3	[GO:0005215] MOLECULAR_FUNCTION transporter activity (IEA) | [GO:0006810] BIOLOGICAL_PROCESS transport (IEA) | [GO:0016021] CELLULAR_COMPONENT integral to membrane (IEA)	WBGene00017751	181270_at	0.21228	0.0108	3.5128	0.034604	16.692
175471_s_at	0.38423	0.0005	3.2703	0.042989	15.64	0.202189	0.512557	3.23977	1.80763	6091.13	T24D1.5	T24D1.5	[GO:0005515] MOLECULAR_FUNCTION protein binding (IEA) | [GO:0008270] MOLECULAR_FUNCTION zinc ion binding (IEA)	WBGene00011988	186432_at	0.3871	0.0093	3.1259	0.049079	12.817	0.237097	0.699719	1.96245	7009.4	C14C11.7	C14C11.7		WBGene00015769	188008_s_at	0.26157	0.0087	7.2593	0.0024102	9.994	0.0923317	0.465147	2.29686	2.48928	27283.1	zig-7	F54D7.4		WBGene00006984	181439_at	0.27683	0.0178	3.9584	0.023634	4.8
175496_s_at	0.33228	0.0009	3.2466	0.043927	20.577	0.226313	0.712034	2.50563	2.37529	1921.16	T23D8.7	T23D8.7		WBGene00011945	186473_at	0.48049	0.0053	3.3113	0.041423	21.184	0.341375	0.628695	8.40862	673.631	C01B12.3	C01B12.3	[GO:0016021] CELLULAR_COMPONENT integral to membrane (IEA)	WBGene00015286	188527_s_at	0.29811	0.0039	5.34	0.008208	1.305	0.00883075	0.133129	3.81233	5.37099	70.8477	acn-1	C42D8.5	[GO:0006508] BIOLOGICAL_PROCESS proteolysis (IEA) | [GO:0008237] MOLECULAR_FUNCTION metallopeptidase activity (IEA) | [GO:0008241] MOLECULAR_FUNCTION peptidyl-dipeptidase activity (IEA) | [GO:0016020] CELLULAR_COMPONENT membrane (IEA) | [GO:0040010] BIOLOGICAL_PROCESS positive regulation of growth rate (IMP) | [GO:0002119] BIOLOGICAL_PROCESS nematode larval development (IMP) | [GO:0040011] BIOLOG…	WBGene00000039	181671_s_at	0.44312	0.0142	4.358	0.017091	19.774
175512_s_at	0.29546	0.0031	3.2618	0.043323	8.655	0.35339	0.530747	1.87638	1.81952	5955.79	C12C8.2	C12C8.2	[GO:0006520] BIOLOGICAL_PROCESS amino acid metabolic process (IEA) | [GO:0030170] MOLECULAR_FUNCTION pyridoxal phosphate binding (IEA) | [GO:0003824] MOLECULAR_FUNCTION catalytic activity (IEA)	WBGene00007533	186586_at	0.49445	0.0007	3.3963	0.038373	15.766	0.382372	0.484888	2.76322	303.566	ZK632.7	ZK632.7		WBGene00014015	189361_s_at	0.28771	0.0025	3.5093	0.034713	22.996	0.334334	0.370492	4.30054	1.67839	11644.6	T26C5.3	T26C5.3	[GO:0016021] CELLULAR_COMPONENT integral to membrane (IEA) | [GO:0009792] BIOLOGICAL_PROCESS embryonic development ending in birth or egg hatching (IMP)	WBGene00012033	181710_at	0.55583	0.0018	4.113	0.020809	16.354
175557_at	0.40019	0.0001	3.9401	0.023998	9.782	0.147679	0.858735	2.88285	1.94726	18519.2	prx-2	ZK809.7	[GO:0005515] MOLECULAR_FUNCTION protein binding (IEA) | [GO:0008270] MOLECULAR_FUNCTION zinc ion binding (IEA) | [GO:0005778] CELLULAR_COMPONENT peroxisomal membrane (IEA) | [GO:0007031] BIOLOGICAL_PROCESS peroxisome organization and biogenesis (IEA) | [GO:0040010] BIOLOGICAL_PROCESS positive regulation of growth rate (IMP) | [GO:0040018] BIOLOGICAL_PROCESS positive regulation of multicellular or…	WBGene00004192	186715_at	0.40818	0.0086	3.9079	0.024652	3.028	0.41731	0.473396	4.98702	175.786	F46C5.2	F46C5.2	[GO:0016021] CELLULAR_COMPONENT integral to membrane (IEA)	WBGene00009779	189690_s_at	0.37068	0.0004	4.1228	0.020644	10.565	0.0253904	0.866736	4.86577	3.10299	3440.49	T14G8.3	T14G8.3	[GO:0030968] BIOLOGICAL_PROCESS endoplasmic reticulum unfolded protein response (IEP) via [WBPaper00005432] Urano F et al. (2002) | [GO:0005524] MOLECULAR_FUNCTION ATP binding (IEA)	WBGene00011771	181840_s_at	0.57846	0.0013	5.1508	0.009393	5.296
175567_at	0.30255	0.0024	3.5688	0.032946	7.648	0.0354839	0.3896	2.54326	2.47458	20731.3	rab-11.1	F53G12.1			187154_at	0.35831	0.0145	6.7521	0.0032568	12.508	0.621202	0.805179	1.67685	7019.92	Y62E10A.14	Y62E10A.14	[GO:0009792] BIOLOGICAL_PROCESS embryonic development ending in birth or egg hatching (IMP)	WBGene00013380	189828_s_at	0.36336	0.0006	5.3404	0.0082052	9.62	0.123683	0.738267	3.71165	4.70048	193414	hsp-3	C15H9.6	[GO:0042221] BIOLOGICAL_PROCESS response to chemical stimulus (ISS) via [WBPaper00001320] Heschl MFP et al. (1990) | [GO:0009306] BIOLOGICAL_PROCESS protein secretion (ISS) via [WBPaper00001320] Heschl MFP et al. (1990) | [GO:0006950] BIOLOGICAL_PROCESS response to stress (ISS) via [WBPaper00001320] Heschl MFP et al. (1990) | [GO:0030968] BIOLOGICAL_PROCESS endoplasmic reticulum unfolded protein …	WBGene00002007	182049_at	0.37325	0.0032	3.1257	0.049091	14.869
175568_at	0.42006	0.0002	3.3186	0.041147	8.824	0.17088	0.692195	3.43601	2.62966	8183.77	F07A5.7	F07A5.7			187156_at	0.34338	0.0074	3.2601	0.043391	4.662	0.38846	0.602079	2.04669	148.553	Y45G12C.1	Y45G12C.1	[GO:0016021] CELLULAR_COMPONENT integral to membrane (IEA)	WBGene00021565	190095_at	0.25859	0.0059	5.3946	0.0078984	1.325	0.244097	0.30963	1.99738	2.1721	1439.56	nhr-228	T27B7.6			182167_at	0.43562	0.0089	4.1165	0.020749	1.948
175734_s_at	0.39806	0.0002	3.822	0.0265	7.856	0.244342	0.659829	4.94648	2.32522	794.793	lev-11	Y105E8B.1	[GO:0030833] BIOLOGICAL_PROCESS regulation of actin filament polymerization (IDA) via [WBPaper00005168] Ono S et al. (2002) | [GO:0043393] BIOLOGICAL_PROCESS regulation of protein binding (IDA) via [WBPaper00005168] Ono S et al. (2002) | [GO:0005865] CELLULAR_COMPONENT striated muscle thin filament (IDA) via [WBPaper00005168] Ono S et al. (2002) | [GO:0051015] MOLECULAR_FUNCTION actin filament bi…	WBGene00002978	187567_at	0.42273	0.0038	3.3487	0.040048	4.977	0.32227	0.421738	2.01949	1053.35	ZK177.2	ZK177.2	[GO:0004672] MOLECULAR_FUNCTION protein kinase activity (IEA) | [GO:0005524] MOLECULAR_FUNCTION ATP binding (IEA) | [GO:0006468] BIOLOGICAL_PROCESS protein amino acid phosphorylation (IEA)	WBGene00022670	190208_at	0.28335	0.003	4.4784	0.015548	2.984	0.0805891	0.51747	2.35199	3.99783	4502.93	H28G03.1	H28G03.1	[GO:0003676] MOLECULAR_FUNCTION nucleic acid binding (IEA) | [GO:0000166] MOLECULAR_FUNCTION nucleotide binding (IEA)	WBGene00019249	182178_at	0.60922	0.0009	5.1929	0.0091128	5.997
175939_s_at	0.46089	0.0002	5.6617	0.0065674	20.61	0.224417	0.671142	1.98813	1.92017	328959	C30A5.3	C30A5.3	[GO:0005515] MOLECULAR_FUNCTION protein binding (IEA)	WBGene00016238	187702_s_at	0.42262	0.0077	6.769	0.0032235	13.263	0.581026	0.716765	1.56004	8073.56	sqv-2	Y110A2AL.14	[GO:0002009] BIOLOGICAL_PROCESS morphogenesis of an epithelium (IMP) via [WBPaper00003405] Herman T et al. (1999) | [GO:0040025] BIOLOGICAL_PROCESS vulval development (IMP) via [WBPaper00003405] Herman T et al. (1999) | [GO:0018991] BIOLOGICAL_PROCESS oviposition (IMP) via [WBPaper00003405] Herman T et al. (1999) | [GO:0000003] BIOLOGICAL_PROCESS reproduction (IMP) via [WBPaper00003405] Herman T …	WBGene00005020	190307_s_at	0.38435	0.0005	3.3996	0.038262	4.58	0.188623	0.471784	3.25869	2.76878	3076.33	his-10	ZK131.4			182204_at	0.20458	0.0019	4.743	0.01269	3.77
175979_at	0.39072	0.0002	4.5568	0.01463	5.619	0.495582	0.695671	1.7343	1.82651	73.4241	nhr-98	M02H5.6	[GO:0003700] MOLECULAR_FUNCTION transcription factor activity (IEA) | [GO:0003707] MOLECULAR_FUNCTION steroid hormone receptor activity (IEA) | [GO:0005634] CELLULAR_COMPONENT nucleus (IEA) | [GO:0006355] BIOLOGICAL_PROCESS regulation of transcription, DNA-dependent (IEA) | [GO:0008270] MOLECULAR_FUNCTION zinc ion binding (IEA) | [GO:0043565] MOLECULAR_FUNCTION sequence-specific DNA binding (IEA)	WBGene00003688	187735_at	0.39805	0.0049	3.3558	0.039792	15.129	0.29722	0.68127	2.24682	4580.23	F57C9.4	F57C9.4	[GO:0005622] CELLULAR_COMPONENT intracellular (IEA) | [GO:0008270] MOLECULAR_FUNCTION zinc ion binding (IEA) | [GO:0003676] MOLECULAR_FUNCTION nucleic acid binding (IEA) | [GO:0009792] BIOLOGICAL_PROCESS embryonic development ending in birth or egg hatching (IMP)	WBGene00019011	190345_s_at	0.32062	0.0007	3.6591	0.030461	3.991	0.0445761	0.142086	2.73374	4.46209	4839.78	Y71H10A.1	Y71H10A.1	[GO:0003872] MOLECULAR_FUNCTION 6-phosphofructokinase activity (IEA) | [GO:0005945] CELLULAR_COMPONENT 6-phosphofructokinase complex (IEA) | [GO:0006096] BIOLOGICAL_PROCESS glycolysis (IEA) | [GO:0005737] CELLULAR_COMPONENT cytoplasm (IEA) | [GO:0009792] BIOLOGICAL_PROCESS embryonic development ending in birth or egg hatching (IMP)	WBGene00022199	182327_at	0.17055	0.0044	3.6412	0.030936	3.835
176043_at	0.47302	0.0001	5.1034	0.0097203	18.465	0.304706	0.779017	2.31411	1.64845	11255.4	tag-307	ZK652.10	[GO:0008340] BIOLOGICAL_PROCESS determination of adult life span (IMP)	WBGene00022787	187764_at	0.37824	0.0115	3.4077	0.037984	10.568	0.359025	0.501188	1.78672	7914.34	Y55F3AM.1	Y55F3AM.1	[GO:0009792] BIOLOGICAL_PROCESS embryonic development ending in birth or egg hatching (IMP)	WBGene00021920	190667_s_at	0.42752	0	3.4937	0.035194	9.037	0.162145	0.605893	2.90889	2.15281	305950	calu-1	M03F4.7	[GO:0005509] MOLECULAR_FUNCTION calcium ion binding (IEA) | [GO:0018996] BIOLOGICAL_PROCESS molting cycle, collagen and cuticulin-based cuticle (IMP) | [GO:0040011] BIOLOGICAL_PROCESS locomotion (IMP) | [GO:0002119] BIOLOGICAL_PROCESS nematode larval development (IMP) | [GO:0040007] BIOLOGICAL_PROCESS growth (IMP)	WBGene00019760	182405_at	0.43984	0.0026	4.0444	0.022011	17.708
176044_at	0.37351	0.0005	3.355	0.039821	7.077	0.316711	0.550282	4.97379	2.23585	103137	Y41D4B.16	Y41D4B.16		WBGene00021518	187853_s_at	0.38774	0.0073	3.5854	0.032472	14.093	0.295764	0.678719	2.38501	14771.7	ung-1	Y56A3A.29	[GO:0004844] MOLECULAR_FUNCTION uracil DNA N-glycosylase activity (IEA) | [GO:0006284] BIOLOGICAL_PROCESS base-excision repair (IEA)	WBGene00013241	191008_at	0.28013	0.0047	11.6215	0.00029072	10.58	0.243094	0.495525	4.84708	2.82372	1991.57	sto-4	Y71H9A.3	[GO:0016020] CELLULAR_COMPONENT membrane (IEA) | [GO:0016021] CELLULAR_COMPONENT integral to membrane (IEA)	WBGene00006066	182503_s_at	0.66897	0.0003	6.5225	0.0037509	17.659
176052_at	0.35979	0.0003	9.1468	0.00088119	21.019	0.10436	0.349024	2.55468	2.14577	11466.5	C50C3.1	C50C3.1	[GO:0003676] MOLECULAR_FUNCTION nucleic acid binding (IEA) | [GO:0008270] MOLECULAR_FUNCTION zinc ion binding (IEA)	WBGene00016799	187985_at	0.41265	0.01	3.4462	0.036706	21.831	0.341474	0.550525	1.58366	57133.6	skr-3	F44G3.6	[GO:0006511] BIOLOGICAL_PROCESS ubiquitin-dependent protein catabolic process (IEA) | [GO:0005515] MOLECULAR_FUNCTION protein binding (IEA) | [GO:0006952] BIOLOGICAL_PROCESS defense response (IMP)	WBGene00004809	191208_s_at	0.41474	0.0002	3.1264	0.049055	15.497	0.326138	0.689713	2.30442	1.794	176496	plk-3	F55G1.8	[GO:0004672] MOLECULAR_FUNCTION protein kinase activity (IEA) | [GO:0005524] MOLECULAR_FUNCTION ATP binding (IEA) | [GO:0006468] BIOLOGICAL_PROCESS protein amino acid phosphorylation (IEA) | [GO:0005515] MOLECULAR_FUNCTION protein binding (IEA) | [GO:0004713] MOLECULAR_FUNCTION protein tyrosine kinase activity (IEA) | [GO:0004674] MOLECULAR_FUNCTION protein serine/threonine kinase activity (IEA)	WBGene00004044	182552_at	0.38714	0.0079	3.5092	0.034715	17.054
176104_at	0.26717	0.003	4.7048	0.013063	7.886	0.277152	0.447846	11.9291	2.04668	448.965	Y41D4B.17	Y41D4B.17		WBGene00021519	188109_s_at	0.33611	0.0108	3.1287	0.048952	16.68	0.282035	0.548842	1.75537	1.53352e+06	clec-87	C25A1.8	[GO:0005488] MOLECULAR_FUNCTION binding (IEA)	WBGene00007709	191433_s_at	0.44738	0.0004	5.0734	0.0099342	15.747	0.290582	0.392078	7.05851	1.75542	869.59	F01G4.3	F01G4.3			182606_at	0.32533	0.012	4.6292	0.013838	15.407
176304_at	0.36362	0.0004	4.1075	0.020902	9.73	0.0933284	0.581715	4.46732	3.7448	3234.39	Y52E8A.3	Y52E8A.3	[GO:0016209] MOLECULAR_FUNCTION antioxidant activity (IEA) | [GO:0016491] MOLECULAR_FUNCTION oxidoreductase activity (IEA)	WBGene00021796	188229_s_at	0.45323	0.0061	5.3647	0.0080664	23.715	0.547748	0.746504	1.72313	81540.9	skr-4	Y60A3A.18	[GO:0006511] BIOLOGICAL_PROCESS ubiquitin-dependent protein catabolic process (IEA) | [GO:0005515] MOLECULAR_FUNCTION protein binding (IEA)	WBGene00004810	192225_at	0.34608	0.0009	3.5566	0.033299	9.508	0.213998	0.524747	1.7516	1.78527	8900.37	T14D7.1	T14D7.1	[GO:0008152] BIOLOGICAL_PROCESS metabolic process (IEA) | [GO:0003824] MOLECULAR_FUNCTION catalytic activity (IEA) | [GO:0030170] MOLECULAR_FUNCTION pyridoxal phosphate binding (IEA)	WBGene00011767	182608_s_at	0.4431	0.0028	3.8234	0.026469	16.344
176544_at	0.32176	0.0009	3.5768	0.032715	8.341	0.388615	0.508655	2.09791	2.89138	883.576	Y71G12B.4	Y71G12B.4	[GO:0004497] MOLECULAR_FUNCTION monooxygenase activity (IEA) | [GO:0005507] MOLECULAR_FUNCTION copper ion binding (IEA) | [GO:0004504] MOLECULAR_FUNCTION peptidylglycine monooxygenase activity (IEA) | [GO:0006518] BIOLOGICAL_PROCESS peptide metabolic process (IEA) | [GO:0016020] CELLULAR_COMPONENT membrane (IEA)	WBGene00022144	188441_at	0.34617	0.0186	3.6189	0.031538	3.026	0.295732	0.630153	3.06581	433045	F21F8.4	F21F8.4	[GO:0004190] MOLECULAR_FUNCTION aspartic-type endopeptidase activity (IEA) | [GO:0006508] BIOLOGICAL_PROCESS proteolysis (IEA)	WBGene00017678	192260_at	0.34544	0.0009	3.1753	0.046892	21.055	0.16488	0.473448	3.07929	1.69068	5319.86	nhr-66	T09A12.4	[GO:0003677] MOLECULAR_FUNCTION DNA binding (IEA) | [GO:0004879] MOLECULAR_FUNCTION ligand-dependent nuclear receptor activity (IEA) | [GO:0005634] CELLULAR_COMPONENT nucleus (IEA) | [GO:0006355] BIOLOGICAL_PROCESS regulation of transcription, DNA-dependent (IEA) | [GO:0003700] MOLECULAR_FUNCTION transcription factor activity (IEA) | [GO:0003707] MOLECULAR_FUNCTION steroid hormone receptor activi…	WBGene00003656	182644_s_at	0.47056	0.0024	5.4419	0.0076415	4.809
176637_s_at	0.25587	0.0087	3.353	0.039893	8.089	0.167583	0.689176	3.68869	2.46565	3867.33	C06H5.6	C06H5.6	[GO:0005215] MOLECULAR_FUNCTION transporter activity (IEA) | [GO:0006810] BIOLOGICAL_PROCESS transport (IEA) | [GO:0016021] CELLULAR_COMPONENT integral to membrane (IEA)	WBGene00007394	188464_at	0.46772	0.0059	3.2174	0.045112	1.577	0.299765	0.647333	1.95868	539.836	F26E4.7	F26E4.7		WBGene00009162	192475_s_at	0.384	0.0004	3.37	0.039289	8.801	0.306396	0.712254	3.03834	2.35103	15672.6	ile-2	T04G9.3	[GO:0016020] CELLULAR_COMPONENT membrane (IEA) | [GO:0016021] CELLULAR_COMPONENT integral to membrane (IEA) | [GO:0009792] BIOLOGICAL_PROCESS embryonic development ending in birth or egg hatching (IMP) | [GO:0018991] BIOLOGICAL_PROCESS oviposition (IMP)	WBGene00002071	183017_s_at	0.41666	0.0083	8.3942	0.0012906	3.887
176638_s_at	0.56308	0	5.1672	0.0092831	15.526	0.550946	0.619006	2.33324	1.5842	36814.2	R144.10	R144.10		WBGene00020098	188470_s_at	0.35947	0.0096	3.1167	0.049502	5.031	0.335245	0.52207	2.2164	24251	ZC416.6	ZC416.6	[GO:0003779] MOLECULAR_FUNCTION actin binding (IEA) | [GO:0006508] BIOLOGICAL_PROCESS proteolysis (IEA) | [GO:0008237] MOLECULAR_FUNCTION metallopeptidase activity (IEA) | [GO:0008270] MOLECULAR_FUNCTION zinc ion binding (IEA)	WBGene00022610	192485_at	0.37453	0.0004	3.6128	0.031705	8.804	0.479349	0.656708	6.72899	11.135	9867.73	F15A4.6	F15A4.6		WBGene00008841	183217_at	0.49646	0.0029	3.1177	0.049454	16.45
176644_at	0.33804	0.0016	4.1282	0.020553	21.842	0.0512232	0.44916	1.96455	1.97385	34952.1	T22C1.1	T22C1.1	[GO:0004842] MOLECULAR_FUNCTION ubiquitin-protein ligase activity (IEA) | [GO:0008270] MOLECULAR_FUNCTION zinc ion binding (IEA)	WBGene00011912	188823_s_at	0.33048	0.0134	3.3922	0.038513	4.23	0.396975	0.544179	1.77576	380347	T25C12.3	T25C12.3	[GO:0005488] MOLECULAR_FUNCTION binding (IEA)	WBGene00012018	192532_s_at	0.25204	0.0074	3.9813	0.023189	20.334	0.242149	0.365786	3.09287	3.33083	26546.2	C14C10.5	C14C10.5			183231_at	0.38373	0.0047	5.4955	0.0073621	3.404
176769_s_at	0.40247	0.0002	5.7157	0.0063314	9.176	0.238398	0.79571	3.29	2.61725	96188.4	ads-1	Y50D7A.7	[GO:0003824] MOLECULAR_FUNCTION catalytic activity (IEA) | [GO:0050660] MOLECULAR_FUNCTION FAD binding (IEA) | [GO:0002119] BIOLOGICAL_PROCESS nematode larval development (IMP) | [GO:0040007] BIOLOGICAL_PROCESS growth (IMP) | [GO:0009792] BIOLOGICAL_PROCESS embryonic development ending in birth or egg hatching (IMP)	WBGene00000081	189668_at	0.44667	0.0005	3.8836	0.025159	17.399	0.432594	0.55476	2.42967	7383.37	ceh-38	F22D3.1	[GO:0003700] MOLECULAR_FUNCTION transcription factor activity (IEA) | [GO:0005634] CELLULAR_COMPONENT nucleus (IEA) | [GO:0006355] BIOLOGICAL_PROCESS regulation of transcription, DNA-dependent (IEA) | [GO:0043565] MOLECULAR_FUNCTION sequence-specific DNA binding (IEA) | [GO:0003677] MOLECULAR_FUNCTION DNA binding (IEA) | [GO:0045449] BIOLOGICAL_PROCESS regulation of transcription (IEA)	WBGene00000459	192759_at	0.46462	0	3.3323	0.040644	17.48	0.32484	0.635	2.91738	1.50067	11606	ZC302.2	ZC302.2		WBGene00013862	183395_at	0.51315	0.001	5.9342	0.0054702	4.637
176777_at	0.45245	0.0001	3.1884	0.046329	18.12	0.348604	0.579279	4.85844	2.42211	24213.5	D1007.16	D1007.16		WBGene00017011	189861_at	0.44293	0.0044	3.4753	0.035769	4.646	0.348155	0.505342	3.25163	7284.6	K10B2.2	K10B2.2	[GO:0004185] MOLECULAR_FUNCTION serine-type carboxypeptidase activity (IEA) | [GO:0006508] BIOLOGICAL_PROCESS proteolysis (IEA)	WBGene00019605	193473_s_at	0.3675	0.0003	4.2351	0.01885	19.523	0.556106	0.836144	2.84823	3.80376	802.21	wrt-3	F38E11.7	[GO:0040018] BIOLOGICAL_PROCESS positive regulation of multicellular organism growth (IMP) | [GO:0040011] BIOLOGICAL_PROCESS locomotion (IMP)	WBGene00006949	183516_at	0.46099	0.0106	3.8447	0.025996	16.795
176797_at	0.25027	0.0079	3.2046	0.045644	6.837	0.195768	0.579258	3.95088	2.47264	60.4717	C03B1.13	C03B1.13	[GO:0005215] MOLECULAR_FUNCTION transporter activity (IEA) | [GO:0006810] BIOLOGICAL_PROCESS transport (IEA) | [GO:0016020] CELLULAR_COMPONENT membrane (IEA) | [GO:0016021] CELLULAR_COMPONENT integral to membrane (IEA)	WBGene00015381	189882_at	0.41901	0.0051	3.5619	0.033146	6.334	0.407278	0.509712	3.02209	2698.49	haf-9	ZK484.2	[GO:0005524] MOLECULAR_FUNCTION ATP binding (IEA) | [GO:0006810] BIOLOGICAL_PROCESS transport (IEA) | [GO:0016021] CELLULAR_COMPONENT integral to membrane (IEA) | [GO:0042626] MOLECULAR_FUNCTION ATPase activity, coupled to transmembrane movement of substances (IEA) | [GO:0016887] MOLECULAR_FUNCTION ATPase activity (IEA) | [GO:0000166] MOLECULAR_FUNCTION nucleotide binding (IEA) | [GO:0017111] MOL…	WBGene00001819	193609_at	0.23029	0.0131	3.5805	0.032611	4.424	0.165061	0.507051	2.87819	4.03585	17002.2	F48E3.3	F48E3.3			183652_at	0.48581	0.0073	3.1847	0.046488	6.284
176940_at	0.39238	0.0004	5.0969	0.0097664	15.029	0.655047	0.794041	3.58178	1.86747	79896.9	Y42H9B.3	Y42H9B.3		WBGene00021541	190121_s_at	0.41893	0.0035	3.4151	0.037736	5.083	0.42486	0.664545	2.85645	6882.47	T25B6.2	T25B6.2	[GO:0004222] MOLECULAR_FUNCTION metalloendopeptidase activity (IEA) | [GO:0006508] BIOLOGICAL_PROCESS proteolysis (IEA) | [GO:0016020] CELLULAR_COMPONENT membrane (IEA) | [GO:0003676] MOLECULAR_FUNCTION nucleic acid binding (IEA) | [GO:0008168] MOLECULAR_FUNCTION methyltransferase activity (IEA) | [GO:0032259] BIOLOGICAL_PROCESS methylation (IEA) | [GO:0008237] MOLECULAR_FUNCTION metallopeptidase…	WBGene00020788	193718_at	0.26728	0.0055	3.2168	0.045141	23.98	0.435317	0.86591	2.975	2.3763	3779.53	cdf-1	C15B12.7	[GO:0046579] BIOLOGICAL_PROCESS positive regulation of Ras protein signal transduction (IMP) via [WBPaper00005255] Bruinsma JJ et al. (2002) | [GO:0040026] BIOLOGICAL_PROCESS positive regulation of vulval development (IMP) via [WBPaper00005255] Bruinsma JJ et al. (2002) | [GO:0006829] BIOLOGICAL_PROCESS zinc ion transport (ISS) via [WBPaper00005255] Bruinsma JJ et al. (2002) | [GO:0005886] CELLUL…	WBGene00000393	183752_at	0.29144	0.0004	10.5195	0.00046469	5.696
177016_at	0.3133	0.0018	3.4761	0.035744	20.36	0.264826	0.558149	2.08883	1.95883	12566.7	Y48G1A.2	Y48G1A.2		WBGene00021658	190224_at	0.56683	0.0001	3.7414	0.028379	14.605	0.379721	0.522099	2.06734	7123.62	F36F12.8	F36F12.8	[GO:0005622] CELLULAR_COMPONENT intracellular (IEA) | [GO:0008270] MOLECULAR_FUNCTION zinc ion binding (IEA)	WBGene00018099	193731_s_at	0.2557	0.0067	3.3558	0.039793	8.277	0.426731	0.689667	3.11007	3.11408	11938.4	immt-1	T14G11.3		WBGene00020511	183779_at	0.46442	0.0094	3.1132	0.04966	16.371
177366_s_at	0.28679	0.004	3.723	0.028829	20.383	0.139351	0.440867	2.19064	1.5379	51520.8	lin-54	JC8.6	[GO:0006357] BIOLOGICAL_PROCESS regulation of transcription from RNA polymerase II promoter (ISS) via [WBPaper00013263] Marin I (2003) | [GO:0040010] BIOLOGICAL_PROCESS positive regulation of growth rate (IMP) | [GO:0040035] BIOLOGICAL_PROCESS hermaphrodite genitalia development (IMP) | [GO:0009792] BIOLOGICAL_PROCESS embryonic development ending in birth or egg hatching (IMP) | [GO:0040027] BIOL…	WBGene00003037	190488_at	0.43529	0.0059	4.7373	0.012746	6.261	0.454466	0.602906	1.8581	6075.21	T26C12.1	T26C12.1	[GO:0000287] MOLECULAR_FUNCTION magnesium ion binding (IEA) | [GO:0016740] MOLECULAR_FUNCTION transferase activity (IEA) | [GO:0030976] MOLECULAR_FUNCTION thiamin pyrophosphate binding (IEA) | [GO:0016021] CELLULAR_COMPONENT integral to membrane (IEA) | [GO:0009792] BIOLOGICAL_PROCESS embryonic development ending in birth or egg hatching (IMP)	WBGene00020831																183870_at	0.44364	0.0018	4.4599	0.015774	18.317
177468_at	0.3568	0.0007	5.2355	0.0088395	9.604	0.0176961	0.593711	7.5768	2.81458	8020.58	ZK896.4	ZK896.4		WBGene00014135	190496_s_at	0.5512	0.0019	8.0828	0.0015224	4.891	0.682453	0.93232	2.96088	7606.97	pod-2	W09B6.1	[GO:0003824] MOLECULAR_FUNCTION catalytic activity (IEA) | [GO:0005524] MOLECULAR_FUNCTION ATP binding (IEA) | [GO:0008152] BIOLOGICAL_PROCESS metabolic process (IEA) | [GO:0016874] MOLECULAR_FUNCTION ligase activity (IEA) | [GO:0009374] MOLECULAR_FUNCTION biotin binding (IEA) | [GO:0009792] BIOLOGICAL_PROCESS embryonic development ending in birth or egg hatching (IMP) | [GO:0040011] BIOLOGICAL_P…	WBGene00004076																183956_at	0.36624	0.0032	3.5022	0.03493	4.158
177472_at	0.4614	0	4.7239	0.012875	17.403	0.263057	0.311964	1.84188	1.56353	45463	W01A8.5	W01A8.5	[GO:0009792] BIOLOGICAL_PROCESS embryonic development ending in birth or egg hatching (IMP) | [GO:0000003] BIOLOGICAL_PROCESS reproduction (IMP)	WBGene00012167	190684_at	0.39388	0.0079	3.7857	0.027327	17.153	0.379339	0.457022	2.28891	37420.2	T21C9.1	T21C9.1	[GO:0005515] MOLECULAR_FUNCTION protein binding (IEA) | [GO:0016021] CELLULAR_COMPONENT integral to membrane (IEA)	WBGene00011890																183969_at	0.45457	0.0026	4.4216	0.016255	6.053
177817_at	0.37734	0.0006	4.7163	0.01295	7.827	0.0194451	0.102974	3.45987	1.95078	60136	W01F3.2	W01F3.2	[GO:0003824] MOLECULAR_FUNCTION catalytic activity (IEA) | [GO:0046872] MOLECULAR_FUNCTION metal ion binding (IEA)	WBGene00012185	190711_at	0.34715	0.0042	3.1535	0.047844	4.586	0.390316	0.711603	2.13546	12782.4	glh-1	T21G5.3	[GO:0009791] BIOLOGICAL_PROCESS post-embryonic development (IMP) via [WBPaper00002611] Gruidl ME et al. (1996) | [GO:0007281] BIOLOGICAL_PROCESS germ cell development (IMP) via [WBPaper00002611] Gruidl ME et al. (1996) | [GO:0016070] BIOLOGICAL_PROCESS RNA metabolic process (ISS) via [WBPaper00002611] Gruidl ME et al. (1996) | [GO:0043186] CELLULAR_COMPONENT P granule (IDA) via [WBPaper00002611] …	WBGene00001598																184019_at	0.48775	0.0014	3.7019	0.029357	3.953
177828_at	0.38905	0.0001	3.6661	0.030277	19.774	0.276058	0.522358	19.5697	2.46204	3424.02	F02H6.4	F02H6.4		WBGene00008537	190809_s_at	0.45767	0.0075	3.2746	0.042823	14.862	0.306453	0.641379	1.72531	24670.9	hcp-3	F58A4.3	[GO:0000070] BIOLOGICAL_PROCESS mitotic sister chromatid segregation (IMP) via [WBPaper00003702] Buchwitz BJ et al. (1999) | [GO:0051382] BIOLOGICAL_PROCESS kinetochore assembly (IMP) via [WBPaper00003702] Buchwitz BJ et al. (1999) | [GO:0007052] BIOLOGICAL_PROCESS mitotic spindle organization and biogenesis (IMP) via [WBPaper00003702] Buchwitz BJ et al. (1999) | [GO:0009792] BIOLOGICAL_PROCESS e…	WBGene00001831																184582_s_at	0.44259	0.0038	6.2174	0.0045487	4.722
177857_s_at	0.50011	0	6.3806	0.0040997	18.432	0.511236	0.792811	5.11515	1.9131	70419.9	T01B7.5	T01B7.5	[GO:0006364] BIOLOGICAL_PROCESS rRNA processing (IEA) | [GO:0032040] CELLULAR_COMPONENT small-subunit processome (IEA) | [GO:0040010] BIOLOGICAL_PROCESS positive regulation of growth rate (IMP) | [GO:0018991] BIOLOGICAL_PROCESS oviposition (IMP) | [GO:0008406] BIOLOGICAL_PROCESS gonad development (IMP) | [GO:0000003] BIOLOGICAL_PROCESS reproduction (IMP) | [GO:0002119] BIOLOGICAL_PROCESS nematode…	WBGene00011311	191212_s_at	0.48981	0.0008	5.5873	0.0069101	17.413	0.52326	0.563682	1.75275	16913	bli-4	K04F10.4	[GO:0040002] BIOLOGICAL_PROCESS collagen and cuticulin-based cuticle development (IMP) via [WBPaper00002160] Thacker CM et al. (1995) | [GO:0009790] BIOLOGICAL_PROCESS embryonic development (IMP) via [WBPaper00002190] Bowerman BA (1995) | [GO:0005634] CELLULAR_COMPONENT nucleus (IDA) via [WBPaper00002160] Thacker CM et al. (1995) | [GO:0016808] MOLECULAR_FUNCTION proprotein convertase activity (I…	WBGene00000254																184712_s_at	0.35581	0.0144	4.7993	0.012164	5.166
177882_at	0.31739	0.0007	3.6777	0.029975	8.441	0.0042437	0.137121	2.80287	1.79027	346.761	F22B5.6	F22B5.6	[GO:0016021] CELLULAR_COMPONENT integral to membrane (IEA)	WBGene00009044	191305_at	0.31704	0.0197	3.1355	0.048648	8.698	0.425848	0.760609	1.59431	73484.5	pgk-1	T03F1.3	[GO:0004618] MOLECULAR_FUNCTION phosphoglycerate kinase activity (IEA) | [GO:0006096] BIOLOGICAL_PROCESS glycolysis (IEA)	WBGene00020185																184713_at	0.46714	0.002	3.5455	0.033625	16.474
177935_at	0.3002	0.0028	3.9469	0.023861	19.865	0.15165	0.299029	2.83509	1.8128	105020	T05F1.2	T05F1.2		WBGene00011489	191403_s_at	0.37355	0.0162	4.0839	0.02131	3.023	0.456966	0.618489	1.72122	16434.5	T08G11.1	T08G11.1	[GO:0008104] BIOLOGICAL_PROCESS protein localization (IEA)	WBGene00011629																185024_s_at	0.30006	0.008	3.3271	0.040834	7.384
178122_at	0.45884	0	4.1711	0.019849	19.427	0.118215	0.31507	4.13816	2.22162	2117.09	F14H3.5	F14H3.5	[GO:0016021] CELLULAR_COMPONENT integral to membrane (IEA)	WBGene00008824	191428_s_at	0.55076	0.002	6.0288	0.0051402	6.319	0.595447	0.745631	1.85614	5060.59	Y25C1A.5	Y25C1A.5	[GO:0005488] MOLECULAR_FUNCTION binding (IEA) | [GO:0008340] BIOLOGICAL_PROCESS determination of adult life span (IMP) | [GO:0000003] BIOLOGICAL_PROCESS reproduction (IMP)	WBGene00021292																185140_at	0.40897	0.0191	4.2257	0.018994	1.578
178186_at	0.40904	0.0003	4.3591	0.017076	8.539	0.10463	0.506299	3.53746	2.21651	299345	F25H5.8	F25H5.8	[GO:0016021] CELLULAR_COMPONENT integral to membrane (IEA)	WBGene00009130	191725_s_at	0.55613	0.0017	4.5973	0.014181	4.169	0.408432	0.833905	2.89557	47.399	K11D9.3	K11D9.3	[GO:0005215] MOLECULAR_FUNCTION transporter activity (IEA) | [GO:0006810] BIOLOGICAL_PROCESS transport (IEA) | [GO:0016020] CELLULAR_COMPONENT membrane (IEA) | [GO:0016021] CELLULAR_COMPONENT integral to membrane (IEA)	WBGene00010772																185184_at	0.60104	0.0008	5.9987	0.0052427	17.688
178211_at	0.25574	0.0086	4.4249	0.016213	20.762	0.0803431	0.352528	1.95584	1.75302	17164.3	F08G5.1	F08G5.1	[GO:0009792] BIOLOGICAL_PROCESS embryonic development ending in birth or egg hatching (IMP)	WBGene00008580	191889_s_at	0.39646	0.0062	3.6666	0.030264	16.398	0.385484	0.490866	2.4267	18889.6	ubc-9	F29B9.6	[GO:0009790] BIOLOGICAL_PROCESS embryonic development (IMP) via [WBPaper00006342] Boulton SJ et al. (2004) | [GO:0032093] MOLECULAR_FUNCTION SAM domain binding (IPI) via [WBPaper00006514] Zhang H et al. (2004) | [GO:0019789] MOLECULAR_FUNCTION SUMO ligase activity (IDA) via [WBPaper00006514] Zhang H et al. (2004) | [GO:0016925] BIOLOGICAL_PROCESS protein sumoylation (IDA) via [WBPaper00006514] Zh…	WBGene00006706																185577_s_at	0.17323	0.0024	4.1828	0.019662	4.454
178376_s_at	0.43298	0.0001	3.4759	0.035751	6.645	0.389145	0.789546	2.65605	1.79463	52960.7	ZK899.2	ZK899.2	[GO:0016021] CELLULAR_COMPONENT integral to membrane (IEA) | [GO:0040010] BIOLOGICAL_PROCESS positive regulation of growth rate (IMP) | [GO:0002119] BIOLOGICAL_PROCESS nematode larval development (IMP) | [GO:0040007] BIOLOGICAL_PROCESS growth (IMP) | [GO:0009792] BIOLOGICAL_PROCESS embryonic development ending in birth or egg hatching (IMP)	WBGene00014141	192079_s_at	0.35491	0.0035	3.5837	0.032519	16.775	0.347605	0.39043	1.65269	1.31749e+06	pos-1	F52E1.1	[GO:0001708] BIOLOGICAL_PROCESS cell fate specification (IMP) via [WBPaper00003382] Tabara H et al. (1999) | [GO:0009880] BIOLOGICAL_PROCESS embryonic pattern specification (IMP) via [WBPaper00003382] Tabara H et al. (1999) | [GO:0009790] BIOLOGICAL_PROCESS embryonic development (IMP) via [WBPaper00003382] Tabara H et al. (1999) | [GO:0005737] CELLULAR_COMPONENT cytoplasm (IDA) via [WBPaper000033…	WBGene00004078																185733_at	0.16637	0.0056	4.1263	0.020584	7.132
178429_at	0.43687	0.0001	3.481	0.03559	16.223	0.448054	0.706109	6.07049	2.02709	154532	F21D5.6	F21D5.6		WBGene00009011	192356_s_at	0.37185	0.008	3.2833	0.042486	2.632	0.340021	0.554305	2.08811	14890.9	spc-1	K10B3.10	[GO:0040018] BIOLOGICAL_PROCESS positive regulation of multicellular organism growth (IMP) via [WBPaper00004127] Moorthy S et al. (2000) | [GO:0040012] BIOLOGICAL_PROCESS regulation of locomotion (IMP) via [WBPaper00004127] Moorthy S et al. (2000) | [GO:0002119] BIOLOGICAL_PROCESS nematode larval development (IMP) via [WBPaper00004127] Moorthy S et al. (2000) | [GO:0010172] BIOLOGICAL_PROCESS emb…	WBGene00004951																185793_at	0.3945	0.0185	4.7638	0.012493	5.811
178430_at	0.22953	0.0124	6.1165	0.0048547	8.912	0.281222	0.64048	3.49709	1.64916	1522.57	C35C5.9	C35C5.9		WBGene00007958	192510_s_at	0.40077	0.0098	4.0573	0.021779	1.612	0.426378	0.654885	1.59111	267.102	Y37A1B.17	Y37A1B.17	[GO:0005089] MOLECULAR_FUNCTION Rho guanyl-nucleotide exchange factor activity (IEA) | [GO:0005622] CELLULAR_COMPONENT intracellular (IEA) | [GO:0035023] BIOLOGICAL_PROCESS regulation of Rho protein signal transduction (IEA)	WBGene00044989																185843_s_at	0.46485	0.0029	6.4471	0.0039318	4.641
178572_at	0.47186	0	5.6303	0.0067099	20.107	0.399393	0.625333	2.30951	2.05421	84657.6	rsa-1	C25A1.9	[GO:0043148] BIOLOGICAL_PROCESS mitotic spindle stabilization (IMP) via [WBPaper00028993] Schlaitz AL et al. (2007) | [GO:0033365] BIOLOGICAL_PROCESS protein localization in organelle (IMP) via [WBPaper00028993] Schlaitz AL et al. (2007) | [GO:0007052] BIOLOGICAL_PROCESS mitotic spindle organization and biogenesis (IMP) via [WBPaper00028993] Schlaitz AL et al. (2007) | [GO:0000159] CELLULAR_COMPO…	WBGene00007710	192759_at	0.46762	0.0082	7.5903	0.0019954	16.048	0.636712	0.709916	1.75487	10531.2	ZC302.2	ZC302.2		WBGene00013862																185857_at	0.54919	0.0032	4.2272	0.01897	18.509
178605_s_at	0.40804	0.0002	3.1532	0.047856	20.548	0.109929	0.639354	1.89015	2.10655	25405.2	C25A1.1	C25A1.1		WBGene00007705	192795_at	0.31221	0.0147	3.1882	0.04634	15.958	0.305286	0.546809	3.55936	14081.5	F19H6.4	F19H6.4	[GO:0005737] CELLULAR_COMPONENT cytoplasm (IEA) | [GO:0006629] BIOLOGICAL_PROCESS lipid metabolic process (IEA) | [GO:0016021] CELLULAR_COMPONENT integral to membrane (IEA) | [GO:0016627] MOLECULAR_FUNCTION oxidoreductase activity, acting on the CH-CH group of donors (IEA) | [GO:0003865] MOLECULAR_FUNCTION 3-oxo-5-alpha-steroid 4-dehydrogenase activity (IEA) | [GO:0008202] BIOLOGICAL_PROCESS ster…	WBGene00008959																186179_at	0.3345	0.0086	3.5197	0.034397	5.489
178733_at	0.2319	0.0121	4.698	0.01313	18.319	0.0535418	0.603334	2.5051	1.97023	11097.5	R07B7.2	R07B7.2		WBGene00011087	192813_at	0.39607	0.0046	4.9453	0.010912	7.409	0.508389	0.531487	1.72343	607603	rpl-21	C14B9.7	[GO:0003735] MOLECULAR_FUNCTION structural constituent of ribosome (IEA) | [GO:0005622] CELLULAR_COMPONENT intracellular (IEA) | [GO:0005840] CELLULAR_COMPONENT ribosome (IEA) | [GO:0006412] BIOLOGICAL_PROCESS translation (IEA) | [GO:0009792] BIOLOGICAL_PROCESS embryonic development ending in birth or egg hatching (IMP) | [GO:0000003] BIOLOGICAL_PROCESS reproduction (IMP) | [GO:0002119] BIOLOGICA…	WBGene00004433																186253_at	0.7005	0.0001	7.7725	0.0018028	16.99
179032_at	0.36988	0.0004	3.8994	0.024827	21.95	0.120053	0.88551	2.13188	1.54162	58578.2	C08F8.3	C08F8.3		WBGene00007445	192850_at	0.41622	0.0115	3.947	0.02386	13.389	0.44593	0.59703	1.55941	7688.76	B0393.6	B0393.6	[GO:0005515] MOLECULAR_FUNCTION protein binding (IEA) | [GO:0008270] MOLECULAR_FUNCTION zinc ion binding (IEA) | [GO:0009792] BIOLOGICAL_PROCESS embryonic development ending in birth or egg hatching (IMP) | [GO:0040010] BIOLOGICAL_PROCESS positive regulation of growth rate (IMP)	WBGene00007171																186361_at	0.26056	0.0051	5.8104	0.00594	4.977
179511_at	0.25142	0.006	4.0516	0.021881	9.944	0.0264043	0.54421	7.6631	3.03813	1940.59	F20G2.5	F20G2.5	[GO:0006952] BIOLOGICAL_PROCESS defense response (IMP)	WBGene00008988	193223_at	0.40721	0.0017	4.0336	0.022208	4.501	0.410202	0.683181	2.25205	839.781	twk-1	F21C3.1	[GO:0005267] MOLECULAR_FUNCTION potassium channel activity (IEA) | [GO:0006813] BIOLOGICAL_PROCESS potassium ion transport (IEA) | [GO:0016020] CELLULAR_COMPONENT membrane (IEA) | [GO:0016021] CELLULAR_COMPONENT integral to membrane (IEA)	WBGene00006656																186566_s_at	0.30405	0.0023	3.7096	0.029163	16.529
179553_at	0.47406	0	3.9938	0.02295	6.364	0.625499	0.710374	4.85349	3.62386	5314.54	F53F8.4	F53F8.4		WBGene00010001	193394_at	0.32325	0.0195	3.5597	0.03321	8.715	0.385895	0.468848	6.27509	630.146	F55E10.6	F55E10.6	[GO:0008152] BIOLOGICAL_PROCESS metabolic process (IEA) | [GO:0016491] MOLECULAR_FUNCTION oxidoreductase activity (IEA) | [GO:0008667] MOLECULAR_FUNCTION 2,3-dihydro-2,3-dihydroxybenzoate dehydrogenase activity (IEA) | [GO:0009239] BIOLOGICAL_PROCESS enterobactin biosynthetic process (IEA) | [GO:0003824] MOLECULAR_FUNCTION catalytic activity (IEA) | [GO:0005488] MOLECULAR_FUNCTION binding (IEA) |…	WBGene00018885																186721_at	0.47187	0.0036	4.1317	0.020494	6.564
179555_at	0.39182	0.0003	8.1193	0.0014928	6.294	0.328714	0.41006	3.99194	2.08857	21929.5	W09D6.5	W09D6.5		WBGene00012358	193562_s_at	0.51299	0.0029	3.9338	0.024123	5.021	0.402904	0.574016	2.93154	1432.95	flp-1	F23B2.5		WBGene00001444																187069_at	0.52785	0.0011	6.6796	0.0034043	6.151
179607_at	0.38146	0.0001	4.1054	0.020937	8.196	0.274837	0.443424	4.60093	2.06008	43729.3	C18E9.9	C18E9.9	[GO:0016021] CELLULAR_COMPONENT integral to membrane (IEA)	WBGene00007689	193767_s_at	0.35682	0.0148	3.3004	0.041832	15.614	0.298591	0.60908	2.13437	41486.6	cpf-2	F56A8.6	[GO:0003676] MOLECULAR_FUNCTION nucleic acid binding (IEA) | [GO:0000166] MOLECULAR_FUNCTION nucleotide binding (IEA) | [GO:0009792] BIOLOGICAL_PROCESS embryonic development ending in birth or egg hatching (IMP) | [GO:0000003] BIOLOGICAL_PROCESS reproduction (IMP)	WBGene00000774																187071_at	0.49435	0.001	5.3633	0.0080743	17.118
179613_at	0.33218	0.0013	4.0164	0.022525	7.83	0.136411	0.450214	2.92609	2.65728	2548.38	C50F4.8	C50F4.8		WBGene00008233	194039_s_at	0.3146	0.0194	3.5072	0.034778	16.506	0.423194	0.581412	2.32882	21076	mex-1	W03C9.7	[GO:0001708] BIOLOGICAL_PROCESS cell fate specification (IMP) via [WBPaper00001584] Mello CC et al. (1992) | [GO:0030010] BIOLOGICAL_PROCESS establishment of cell polarity (IMP) via [WBPaper00002400] Schnabel R et al. (1996) | [GO:0001704] BIOLOGICAL_PROCESS formation of primary germ layer (IMP) via [WBPaper00002661] Guedes SF et al. (1997) | [GO:0009880] BIOLOGICAL_PROCESS embryonic pattern spec…	WBGene00003228																187084_at	0.48027	0.0027	5.7986	0.0059872	17.622
179632_s_at	0.35871	0.0008	4.4325	0.016117	8.021	0.320018	0.765	2.71158	3.9681	6301.05	F45D3.3	F45D3.3		WBGene00009723	194204_x_at	0.53413	0.0007	4.4676	0.01568	16.146	0.45682	0.674257	1.8398	19101.9	K08F11.5	K08F11.5	[GO:0005525] MOLECULAR_FUNCTION GTP binding (IEA) | [GO:0007264] BIOLOGICAL_PROCESS small GTPase mediated signal transduction (IEA) | [GO:0005509] MOLECULAR_FUNCTION calcium ion binding (IEA) | [GO:0005622] CELLULAR_COMPONENT intracellular (IEA) | [GO:0015031] BIOLOGICAL_PROCESS protein transport (IEA) | [GO:0016021] CELLULAR_COMPONENT integral to membrane (IEA) | [GO:0002119] BIOLOGICAL_PROCESS …	WBGene00019544																187085_s_at	0.42093	0.0026	5.6439	0.0066476	17.657
179650_at	0.38129	0.0006	6.775	0.0032119	8.157	0.192933	0.611108	8.32067	3.38439	12482.8	K08D8.4	K08D8.4		WBGene00010658																														187264_at	0.41961	0.0042	3.2143	0.045244	18.2
179679_at	0.34993	0.0008	3.4142	0.037764	16.645	0.0154866	0.116658	2.03962	1.74034	5195.88	F52H3.4	F52H3.4		WBGene00009946																														187288_s_at	0.58547	0.0016	5.9566	0.00539	4.831
180340_at	0.35711	0.0009	7.7061	0.0018704	6.433	0.483008	0.609433	6.16289	3.87115	791.323	oig-1	C09E7.3		WBGene00003859																														187336_at	0.33237	0.0165	3.8439	0.026014	0.226
180373_at	0.4665	0	4.2892	0.018051	18.885	0.319859	0.49743	8.08387	2.88693	6518.49	C35E7.1	C35E7.1		WBGene00016453																														187506_s_at	0.38058	0.0103	4.4364	0.016068	4.759
180427_at	0.32029	0.002	3.7796	0.027469	7.735	0.174723	0.637869	5.47935	2.04936	20924.7	ZC395.5	ZC395.5		WBGene00022597																														187513_at	0.489	0.0013	5.3888	0.0079308	4.681
180444_s_at	0.36262	0.0005	3.5858	0.03246	19.012	0.177042	0.629461	2.01007	1.64386	37439.3	ZC477.5	ZC477.5		WBGene00022620																														187560_at	0.55964	0.0008	4.3377	0.017368	17.243
180471_at	0.42874	0.0001	4.2301	0.018927	6.656	0.289438	0.601778	4.62094	2.11547	11941	Y17G7B.8	Y17G7B.8		WBGene00012462																														187716_at	0.55153	0.0006	3.8392	0.026116	2.79
180823_at	0.36756	0.0003	3.2831	0.042491	7.841	0.383203	0.68837	2.23381	2.1051	90.9491	Y43F8B.9	Y43F8B.9		WBGene00012819																														187729_s_at	0.36599	0.0133	4.7614	0.012516	8.632
180874_at	0.37668	0.0005	6.1468	0.0047603	8.935	0.220314	0.4725	7.82599	2.9794	2450.5	C04C11.1	C04C11.1		WBGene00007295																														187785_s_at	0.32311	0.0128	3.3426	0.040268	3.619
180886_s_at	0.52101	0	4.698	0.013131	17.612	0.375844	0.47256	2.98128	1.67062	103244	C36B1.11	C36B1.11		WBGene00007978																														187796_at	0.31619	0.0077	4.4097	0.016408	4.635
181090_at	0.24012	0.0095	3.3492	0.040028	13.799	0.346662	0.733432	2.39692	2.13485	31835.9	T16G12.8	T16G12.8	[GO:0016021] CELLULAR_COMPONENT integral to membrane (IEA)	WBGene00011809																														188026_at	0.41191	0.0044	4.4022	0.016505	4.331
181188_at	0.36911	0.0004	3.8303	0.026314	9.368	0.170737	0.673433	3.22704	1.69587	274191	C35B1.4	C35B1.4		WBGene00016434																														188316_s_at	0.12753	0.0142	4.2315	0.018906	4.932
181221_s_at	0.35195	0.001	6.6292	0.0035112	16.864	0.103247	0.125312	1.91968	1.58381	73205.9	skpt-1	F48E8.7		WBGene00018613																														188541_s_at	0.40565	0.0088	4.2538	0.01857	4.475
181288_at	0.21817	0.02	3.7768	0.027536	17.947	0.0255056	0.194131	2.83707	1.92938	8241.81	H02I12.5	H02I12.5	[GO:0009792] BIOLOGICAL_PROCESS embryonic development ending in birth or egg hatching (IMP)	WBGene00010353																														188617_s_at	0.46512	0.0015	7.6503	0.0019295	4.189
181588_at	0.55838	0	4.8535	0.011681	18.234	0.448688	0.81287	5.00408	2.59489	3663.94	W02D7.5	W02D7.5		WBGene00020941																														188627_at	0.42132	0.002	5.203	0.0090472	2.834
181644_at	0.53307	0	6.8217	0.0031223	19.295	0.576671	0.642356	2.06599	1.70811	169344	T21C9.13	T21C9.13	[GO:0016021] CELLULAR_COMPONENT integral to membrane (IEA)	WBGene00011898																														188648_at	0.53259	0.0055	4.1707	0.019856	8.082
181723_at	0.38836	0.0001	3.4955	0.035136	9.41	0.14473	0.192177	1.83085	1.85883	89855.9	K07B1.6	K07B1.6	[GO:0002119] BIOLOGICAL_PROCESS nematode larval development (IMP) | [GO:0040007] BIOLOGICAL_PROCESS growth (IMP)	WBGene00019466																														188690_at	0.52056	0.0007	4.5643	0.014546	5.197
181769_s_at	0.43654	0.0001	5.1137	0.0096482	14.461	0.132181	0.421393	1.89866	1.8076	31296.3	B0261.7	B0261.7		WBGene00015095																														188777_s_at	0.42723	0.0109	4.6405	0.013719	3.81
181785_at	0.48576	0	4.2594	0.018487	18.751	0.340736	0.62768	2.8852	1.93207	46316.7	ZC308.4	ZC308.4		WBGene00022586																														188846_at	0.39099	0.0001	5.7947	0.006003	7.004
181911_at	0.38831	0.0002	5.0851	0.0098505	17.967	0.358484	0.763391	1.58344	1.61214	29034.1	F26H11.4	F26H11.4		WBGene00009182																														188880_at	0.29528	0.0121	3.1144	0.049606	6.131
181968_s_at	0.30411	0.0015	3.4806	0.035602	1.124	0.0685286	0.416728	1.58157	1.67497	150.194	mac-1	Y48C3A.7	[GO:0019915] BIOLOGICAL_PROCESS sequestering of lipid (IMP) via [WBPaper00005707] McKay RM et al. (2003) | [GO:0000166] MOLECULAR_FUNCTION nucleotide binding (IEA) | [GO:0017111] MOLECULAR_FUNCTION nucleoside-triphosphatase activity (IEA) | [GO:0005524] MOLECULAR_FUNCTION ATP binding (IEA) | [GO:0002119] BIOLOGICAL_PROCESS nematode larval development (IMP) | [GO:0040007] BIOLOGICAL_PROCESS growth…	WBGene00003119																														188981_at	0.4451	0.0029	4.6848	0.013263	3.491
182003_at	0.36476	0.0001	3.2508	0.043759	7.062	0.386037	0.558656	10.0142	2.52225	4432.2	C42D8.1	C42D8.1	[GO:0016021] CELLULAR_COMPONENT integral to membrane (IEA)	WBGene00016599																														189072_at	0.38068	0.0012	10.3726	0.00049608	5.007
182159_at	0.22401	0.0171	3.4251	0.0374	22.082	0.0139785	0.544576	2.16291	1.8488	18953.5	ZK973.2	ZK973.2	[GO:0000785] CELLULAR_COMPONENT chromatin (IEA) | [GO:0003682] MOLECULAR_FUNCTION chromatin binding (IEA) | [GO:0005634] CELLULAR_COMPONENT nucleus (IEA) | [GO:0006333] BIOLOGICAL_PROCESS chromatin assembly or disassembly (IEA)	WBGene00022831																														189463_at	0.1935	0.0061	5.3192	0.008329	12.256
182192_s_at	0.41134	0.0002	5.382	0.0079688	8.579	0.177845	0.348398	3.42874	2.39291	363.635	C24A1.3	C24A1.3	[GO:0004672] MOLECULAR_FUNCTION protein kinase activity (IEA) | [GO:0005524] MOLECULAR_FUNCTION ATP binding (IEA) | [GO:0006468] BIOLOGICAL_PROCESS protein amino acid phosphorylation (IEA) | [GO:0004713] MOLECULAR_FUNCTION protein tyrosine kinase activity (IEA) | [GO:0004674] MOLECULAR_FUNCTION protein serine/threonine kinase activity (IEA)	WBGene00016030																														189508_s_at	0.34141	0.0156	3.7061	0.02925	5.088
182837_s_at	0.31595	0.0014	4.0414	0.022067	22.627	0.0814201	0.649191	1.82814	1.7534	18044.6	gei-17	W10D5.3	[GO:0008270] MOLECULAR_FUNCTION zinc ion binding (IEA) | [GO:0009792] BIOLOGICAL_PROCESS embryonic development ending in birth or egg hatching (IMP) | [GO:0010171] BIOLOGICAL_PROCESS body morphogenesis (IMP) | [GO:0040035] BIOLOGICAL_PROCESS hermaphrodite genitalia development (IMP) | [GO:0040010] BIOLOGICAL_PROCESS positive regulation of growth rate (IMP) | [GO:0040018] BIOLOGICAL_PROCESS positi…	WBGene00001574																														189517_at	0.21677	0.0038	5.8568	0.0057588	4.227
182876_s_at	0.20897	0.0175	3.7433	0.028333	21.613	0.0755257	0.357154	2.14685	1.86993	37927.4	T19B10.6	T19B10.6	[GO:0003677] MOLECULAR_FUNCTION DNA binding (IEA) | [GO:0006281] BIOLOGICAL_PROCESS DNA repair (IEA) | [GO:0000003] BIOLOGICAL_PROCESS reproduction (IMP)	WBGene00011834																														189562_at	0.22371	0.0159	3.2666	0.043135	5.345
182924_at	0.25607	0.007	3.2202	0.044997	21.388	0.0403279	0.372837	1.90555	2.10797	6745.06	C25F6.1	C25F6.1		WBGene00016102																														189587_s_at	0.33994	0.0069	4.1965	0.019446	6.331
182989_at	0.23578	0.0121	4.8302	0.011885	8.752	0.167212	0.399453	1.74753	1.50988	821430	lys-1	Y22F5A.4	[GO:0003824] MOLECULAR_FUNCTION catalytic activity (IEA) | [GO:0005975] BIOLOGICAL_PROCESS carbohydrate metabolic process (IEA) | [GO:0043169] MOLECULAR_FUNCTION cation binding (IEA)	WBGene00003090																														189629_at	0.35783	0.0058	3.2091	0.04546	15.761
183062_at	0.36925	0.0008	4.3554	0.017126	9.163	0.00133824	0.35754	2.53292	2.32878	28476	F16B4.4	F16B4.4		WBGene00017506																														189683_at	0.28385	0.0015	4.0791	0.021392	6.095
183125_at	0.42092	0.0002	4.8298	0.011889	8.705	0.272041	0.759465	2.96509	2.31897	11941.2	F25E5.8	F25E5.8		WBGene00017789																														189706_s_at	0.32515	0.002	3.2839	0.042462	5.504
183157_s_at	0.4102	0.0001	3.3727	0.039195	17.14	0.357009	0.388263	2.16699	1.64361	18920.4	lin-37	ZK418.4	[GO:0048557] BIOLOGICAL_PROCESS embryonic digestive tract morphogenesis (IGI) via [WBPaper00024215] Fay DS et al. (2004) | [GO:0002119] BIOLOGICAL_PROCESS nematode larval development (IMP) | [GO:0040007] BIOLOGICAL_PROCESS growth (IMP) | [GO:0009792] BIOLOGICAL_PROCESS embryonic development ending in birth or egg hatching (IMP) | [GO:0040010] BIOLOGICAL_PROCESS positive regulation of growth rate …	WBGene00003022																														189714_at	0.31366	0.0016	4.9369	0.01098	5.952
183194_s_at	0.30475	0.0031	3.556	0.033318	21.401	0.067909	0.299222	2.74523	2.12767	20251.9	F08F3.6	F08F3.6		WBGene00017263																														189953_at	0.57192	0.0004	6.2572	0.0044343	16.743
183207_at	0.32053	0.0015	7.4408	0.0021716	7.52	0.0472639	0.363808	2.72677	1.90664	76830.8	D2096.3	D2096.3	[GO:0004553] MOLECULAR_FUNCTION hydrolase activity, hydrolyzing O-glycosyl compounds (IEA) | [GO:0005975] BIOLOGICAL_PROCESS carbohydrate metabolic process (IEA)	WBGene00017071																														189976_at	0.4646	0.0014	3.2313	0.044546	3.724
183256_at	0.46222	0	4.2685	0.018352	18.469	0.219353	0.48819	1.81507	1.50682	120061	C01G5.6	C01G5.6		WBGene00015308																														190013_at	0.21764	0.0041	7.7171	0.0018591	13.101
183291_at	0.38065	0	7.3695	0.0022619	19.837	0.210627	0.376494	1.91124	1.70052	18836.7	F56C9.3	F56C9.3	[GO:0006812] BIOLOGICAL_PROCESS cation transport (IEA) | [GO:0008324] MOLECULAR_FUNCTION cation transmembrane transporter activity (IEA) | [GO:0016020] CELLULAR_COMPONENT membrane (IEA) | [GO:0016021] CELLULAR_COMPONENT integral to membrane (IEA)	WBGene00018948																														190052_at	0.3082	0.0137	5.4448	0.0076262	19.093
183528_at	0.3679	0.0008	3.3774	0.039028	15.662	0.1241	0.231183	1.84638	1.64277	52909.4	T21B10.4	T21B10.4	[GO:0016021] CELLULAR_COMPONENT integral to membrane (IEA)	WBGene00011886																														190094_s_at	0.14643	0.0036	3.1776	0.046791	4.908
183620_at	0.32256	0.0013	5.6342	0.0066918	19.472	0.147684	0.609692	2.32086	1.57629	166302	W06B4.1	W06B4.1		WBGene00021056																														190419_s_at	0.55747	0.0019	4.5251	0.014994	3.224
183785_at	0.46477	0.0001	3.6358	0.031079	17.157	0.55541	0.834369	2.95544	1.90999	1043.23	F26F4.6	F26F4.6		WBGene00017828																														190486_s_at	0.31988	0.0027	6.7513	0.0032584	4.716
183811_at	0.2865	0.0045	3.61	0.031784	21.557	0.0785498	0.621084	2.04868	1.74029	22614.5	K09H9.2	K09H9.2		WBGene00019595																														190499_s_at	0.55679	0.0013	5.6182	0.0067653	6.588
183904_at	0.41334	0	5.4195	0.0077623	19.686	0.201605	0.752246	5.39829	3.99126	146.882	T12A2.3	T12A2.3		WBGene00020438																														190507_at	0.49312	0.003	4.5733	0.014446	4.445
183973_at	0.29712	0.004	4.809	0.012075	8.609	0.20334	0.700589	3.96521	2.05359	3426.3	F17E9.2	F17E9.2		WBGene00017539																														190541_at	0.41845	0.0098	3.63	0.031235	17.264
183991_at	0.44275	0	4.4974	0.01532	9.466	0.217374	0.55592	3.09552	4.11369	576.072	cutl-14	B0511.5		WBGene00015231																														190557_s_at	0.23761	0.0091	9.0124	0.00094171	4.042
184002_at	0.21191	0.0197	3.1267	0.049045	5.059	0.0696038	0.350625	3.21413	1.60775	472081	clc-1	C09F12.1	[GO:0005911] CELLULAR_COMPONENT intercellular junction (IDA) via [WBPaper00005946] Asano A et al. (2003) | [GO:0016021] CELLULAR_COMPONENT integral to membrane (IEA) | [GO:0018996] BIOLOGICAL_PROCESS molting cycle, collagen and cuticulin-based cuticle (IMP)	WBGene00000522																														190615_s_at	0.47583	0.0045	3.2631	0.04327	4.433
184043_s_at	0.2839	0.0043	4.4757	0.015581	18.155	0.154516	0.415327	2.11792	1.57731	18907.8	tag-131	H38K22.3	[GO:0020037] MOLECULAR_FUNCTION heme binding (IEA) | [GO:0046914] MOLECULAR_FUNCTION transition metal ion binding (IEA) | [GO:0016021] CELLULAR_COMPONENT integral to membrane (IEA)	WBGene00006478																														190677_at	0.45712	0.0092	4.4371	0.016059	3.55
184098_s_at	0.3308	0.0016	4.5193	0.015062	7.884	0.162191	0.896356	4.23306	3.91374	6456.6	Y73F4A.2	Y73F4A.2	[GO:0004500] MOLECULAR_FUNCTION dopamine beta-monooxygenase activity (IEA) | [GO:0006548] BIOLOGICAL_PROCESS histidine catabolic process (IEA) | [GO:0009792] BIOLOGICAL_PROCESS embryonic development ending in birth or egg hatching (IMP)	WBGene00013515																														191219_at	0.40589	0.0022	4.3091	0.017767	6.548
184144_at	0.31124	0.0024	3.4069	0.038012	8.494	0.106611	0.837606	4.18586	3.65258	5032.75	R193.2	R193.2	[GO:0040010] BIOLOGICAL_PROCESS positive regulation of growth rate (IMP)	WBGene00020128																														191301_s_at	0.22822	0.0041	4.1733	0.019814	5.239
184146_s_at	0.30899	0.0034	4.3283	0.017499	20.428	0.056601	0.497092	1.68346	1.64555	115731	abi-1	B0336.6	[GO:0005737] CELLULAR_COMPONENT cytoplasm (IEA) | [GO:0009792] BIOLOGICAL_PROCESS embryonic development ending in birth or egg hatching (IMP) | [GO:0002119] BIOLOGICAL_PROCESS nematode larval development (IMP) | [GO:0040007] BIOLOGICAL_PROCESS growth (IMP) | [GO:0008340] BIOLOGICAL_PROCESS determination of adult life span (IMP) | [GO:0010171] BIOLOGICAL_PROCESS body morphogenesis (IMP) | [GO:0040…	WBGene00015146																														191363_s_at	0.40632	0.0091	4.8685	0.011551	4.08
184319_at	0.26861	0.0053	3.4432	0.036803	8.079	0.0940019	0.573551	1.91391	3.3468	6923.04	cpn-4	F49D11.8		WBGene00000780																														191415_at	0.297	0.0124	3.2052	0.045623	6.126
184418_at	0.44973	0	3.4287	0.03728	6.615	0.338394	0.702611	5.10485	6.5607	2621.89	K11H12.6	K11H12.6		WBGene00019662																														191583_s_at	0.19527	0.0197	3.1532	0.047857	6.118
184457_at	0.2963	0.0018	4.108	0.020894	10.379	0.0615796	0.526721	2.04072	2.73432	454.655	btb-14	Y57A10B.3	[GO:0005515] MOLECULAR_FUNCTION protein binding (IEA)	WBGene00013275																														191612_at	0.2124	0.0158	3.576	0.03274	5.172
184558_at	0.3451	0.0011	5.1172	0.0096234	9.973	0.129959	0.726581	2.93949	2.4123	1149.54	nlp-17	Y45F10A.5	[GO:0010171] BIOLOGICAL_PROCESS body morphogenesis (IMP)	WBGene00003755																														191629_at	0.55712	0.0018	6.895	0.0029874	6.202
184578_at	0.49268	0	4.3616	0.017042	14.819	0.377439	0.603305	4.46591	2.19805	7728.01	Y106G6A.2	Y106G6A.2	[GO:0040010] BIOLOGICAL_PROCESS positive regulation of growth rate (IMP)	WBGene00013695																														191631_at	0.46385	0.0087	3.308	0.041546	16.978
184596_s_at	0.38764	0.0004	4.9683	0.010728	10.518	0.277076	0.444843	3.15936	3.93165	549.517	mec-17	F57H12.7	[GO:0048666] BIOLOGICAL_PROCESS neuron development (IMP) via [WBPaper00001829] Mitani S et al. (1993)	WBGene00003178																														191800_at	0.35692	0.0173	4.3108	0.017744	4.545
184819_s_at	0.30182	0.0023	4.6321	0.013807	8.236	0.0321356	0.237403	1.84405	2.19128	47108.5	Y66H1B.2	Y66H1B.2	[GO:0009792] BIOLOGICAL_PROCESS embryonic development ending in birth or egg hatching (IMP) | [GO:0010171] BIOLOGICAL_PROCESS body morphogenesis (IMP) | [GO:0000003] BIOLOGICAL_PROCESS reproduction (IMP)	WBGene00022048																														191801_s_at	0.37893	0.0155	3.7283	0.028699	5.167
184919_s_at	0.31766	0.0018	3.9732	0.023346	17.941	0.214098	0.624264	1.84213	1.62916	19404	F32E10.5	F32E10.5																																191978_at	0.35619	0.0016	4.0476	0.021954	4.743
184943_s_at	0.37818	0.0006	3.8603	0.025656	20.319	0.279584	0.511626	2.46845	1.88073	88739.8	T02G5.11	T02G5.11	[GO:0003723] MOLECULAR_FUNCTION RNA binding (IEA) | [GO:0008270] MOLECULAR_FUNCTION zinc ion binding (IEA)	WBGene00020167																														192068_s_at	0.4711	0.0049	3.4572	0.036349	5.427
184960_at	0.61793	0	5.6072	0.0068168	18.512	0.509153	0.713763	2.53091	1.72316	10268.2	C33F10.4	C33F10.4		WBGene00016353																														192076_at	0.2678	0.0025	3.4909	0.035279	8.195
185302_s_at	0.39147	0.0003	4.3617	0.017042	20.654	0.279282	0.448742	2.15204	1.82372	35210.5	Y106G6H.6	Y106G6H.6	[GO:0005488] MOLECULAR_FUNCTION binding (IEA) | [GO:0009792] BIOLOGICAL_PROCESS embryonic development ending in birth or egg hatching (IMP) | [GO:0000003] BIOLOGICAL_PROCESS reproduction (IMP)	WBGene00013719																														192123_at	0.48815	0.0082	3.7253	0.028774	4.721
185319_at	0.47806	0	3.5089	0.034723	19.204	0.32631	0.715625	2.21296	1.84957	5754.06	Y53C10A.6	Y53C10A.6		WBGene00013137																														192153_at	0.2297	0.0049	5.5579	0.0070516	6.304
185826_at	0.24546	0.0097	3.6255	0.031358	3.302	0.00519973	0.316311	3.76455	6.43992	2880.74	T03F1.11	T03F1.11	[GO:0005509] MOLECULAR_FUNCTION calcium ion binding (IEA)	WBGene00020192																														192156_at	0.60873	0.0013	6.2718	0.004393	4.215
185982_s_at	0.35627	0.0006	3.2767	0.042738	12.929	0.018577	0.438322	1.70047	1.81514	7946.08	R02D3.8	R02D3.8	[GO:0004527] MOLECULAR_FUNCTION exonuclease activity (IEA) | [GO:0005622] CELLULAR_COMPONENT intracellular (IEA)	WBGene00019825																														192158_at	0.35261	0.0196	3.4356	0.037051	3.754
186182_s_at	0.42263	0	4.3597	0.017068	6.349	0.145814	0.525553	5.35793	3.60312	23301.8	hrg-1	R02E12.6	[GO:0016021] CELLULAR_COMPONENT integral to membrane (IEA)	WBGene00019830																														192446_s_at	0.50337	0.0051	3.2454	0.043976	4.955
186356_at	0.25116	0.0083	3.359	0.039677	8.508	0.0525126	0.408921	4.34597	1.99749	787.275	ZC239.16	ZC239.16	[GO:0005515] MOLECULAR_FUNCTION protein binding (IEA) | [GO:0016021] CELLULAR_COMPONENT integral to membrane (IEA)	WBGene00022574																														192474_s_at	0.36609	0.0038	3.1619	0.047475	7.393
186383_at	0.44826	0	5.8064	0.0059562	7.644	0.243679	0.327537	4.18597	1.84164	118105	T19D12.4	T19D12.4	[GO:0016021] CELLULAR_COMPONENT integral to membrane (IEA) | [GO:0006952] BIOLOGICAL_PROCESS defense response (IMP)	WBGene00020579																														192507_at	0.21256	0.0099	4.7695	0.01244	5.41
186384_s_at	0.3065	0.0023	3.3746	0.039126	19.226	0.19116	0.30744	3.63362	2.60598	5157.74	Y43F11A.1	Y43F11A.1		WBGene00012841																														192819_at	0.3329	0.0124	4.8968	0.01131	6.189
186436_at	0.37268	0.0003	4.4027	0.016498	20.763	0.223964	0.372274	1.97699	1.66555	3436.73	set-24	Y43F11A.5	[GO:0005634] CELLULAR_COMPONENT nucleus (IEA)	WBGene00012845																														192979_at	0.34711	0.0177	3.906	0.024691	4.151
186480_s_at	0.49934	0	3.292	0.042151	3.423	0.522252	0.910734	2.22291	2.32608	202.425	tom-1	M01A10.2	[GO:0016082] BIOLOGICAL_PROCESS synaptic vesicle priming (IMP) via [WBPaper00028364] Gracheva EO et al. (2006) | [GO:0031201] CELLULAR_COMPONENT SNARE complex (IPI) via [WBPaper00028364] Gracheva EO et al. (2006) | [GO:0009792] BIOLOGICAL_PROCESS embryonic development ending in birth or egg hatching (IMP) | [GO:0002119] BIOLOGICAL_PROCESS nematode larval development (IMP) | [GO:0040011] BIOLOGICA…	WBGene00006594																														193124_s_at	0.43882	0.0147	3.197	0.045966	4.971
186540_at	0.3551	0.0017	3.4524	0.036503	16.349	0.46074	0.78721	2.66637	1.85489	381751	C35D10.13	C35D10.13	[GO:0009792] BIOLOGICAL_PROCESS embryonic development ending in birth or egg hatching (IMP) | [GO:0000003] BIOLOGICAL_PROCESS reproduction (IMP) | [GO:0040010] BIOLOGICAL_PROCESS positive regulation of growth rate (IMP)	WBGene00016449																														193176_s_at	0.18232	0.0065	5.0487	0.010115	4.857
186603_at	0.35824	0.0011	4.4782	0.015551	21.499	0.0201511	0.594215	1.81606	1.82959	55023.6	F33H1.3	F33H1.3	[GO:0009792] BIOLOGICAL_PROCESS embryonic development ending in birth or egg hatching (IMP) | [GO:0002119] BIOLOGICAL_PROCESS nematode larval development (IMP) | [GO:0040007] BIOLOGICAL_PROCESS growth (IMP) | [GO:0010171] BIOLOGICAL_PROCESS body morphogenesis (IMP) | [GO:0040002] BIOLOGICAL_PROCESS collagen and cuticulin-based cuticle development (IMP) | [GO:0040010] BIOLOGICAL_PROCESS positive r…	WBGene00009364																														193254_s_at	0.43788	0.0097	5.2152	0.0089687	4.943
186609_s_at	0.21995	0.0165	5.912	0.0055513	23.246	0.0428251	0.657853	1.90867	1.73159	1806.77	lpd-3	Y47G6A.23	[GO:0019915] BIOLOGICAL_PROCESS sequestering of lipid (IMP) via [WBPaper00005707] McKay RM et al. (2003) | [GO:0006629] BIOLOGICAL_PROCESS lipid metabolic process (IMP) | [GO:0002119] BIOLOGICAL_PROCESS nematode larval development (IMP) | [GO:0040007] BIOLOGICAL_PROCESS growth (IMP)	WBGene00003060																														193277_at	0.30231	0.0103	4.4946	0.015353	5.25
186941_at	0.31904	0.0014	3.874	0.025361	8.332	0.161804	0.248602	4.88195	1.91715	7412.17	mua-1	F54H5.4	[GO:0007160] BIOLOGICAL_PROCESS cell-matrix adhesion (IMP) via [WBPaper00019638] Shivani Sapre et al. (2003) | [GO:0040011] BIOLOGICAL_PROCESS locomotion (IMP) via [WBPaper00019638] Shivani Sapre et al. (2003) | [GO:0040025] BIOLOGICAL_PROCESS vulval development (IMP) via [WBPaper00003943] Plenefisch JD et al. (2000) | [GO:0003700] MOLECULAR_FUNCTION transcription factor activity (ISS) via [WBPap…	WBGene00003480																														193381_s_at	0.30561	0.0125	4.0991	0.021046	3.731
187029_at	0.36828	0.0002	3.5581	0.033256	8.57	0.318077	0.425566	3.04723	4.40013	57.4647	C17H12.10	C17H12.10	[GO:0016021] CELLULAR_COMPONENT integral to membrane (IEA)	WBGene00015935																														193465_at	0.49837	0.0029	7.5245	0.0020709	5.454
187082_s_at	0.23884	0.0085	3.8343	0.026226	7.095	0.164875	0.224563	2.75736	1.51394	1616.21	mlk-1	K11D12.10	[GO:0004672] MOLECULAR_FUNCTION protein kinase activity (IEA) | [GO:0005524] MOLECULAR_FUNCTION ATP binding (IEA) | [GO:0006468] BIOLOGICAL_PROCESS protein amino acid phosphorylation (IEA) | [GO:0004713] MOLECULAR_FUNCTION protein tyrosine kinase activity (IEA) | [GO:0004674] MOLECULAR_FUNCTION protein serine/threonine kinase activity (IEA)	WBGene00003374																														193499_s_at	0.18439	0.0043	3.2141	0.04525	4.955
187089_s_at	0.34919	0.0008	3.3168	0.041216	21.441	0.340629	0.665181	2.46429	2.2839	38807.6	zif-1	F59B2.6	[GO:0009792] BIOLOGICAL_PROCESS embryonic development ending in birth or egg hatching (IMP)	WBGene00006977																														193575_s_at	0.35442	0.0195	4.8541	0.011675	3.907
187121_at	0.2178	0.0161	3.555	0.033348	8.17	0.0834574	0.552036	7.25834	2.36541	1346.46	Y105C5A.24	Y105C5A.24	[GO:0004672] MOLECULAR_FUNCTION protein kinase activity (IEA) | [GO:0005524] MOLECULAR_FUNCTION ATP binding (IEA) | [GO:0006468] BIOLOGICAL_PROCESS protein amino acid phosphorylation (IEA) | [GO:0004713] MOLECULAR_FUNCTION protein tyrosine kinase activity (IEA) | [GO:0004674] MOLECULAR_FUNCTION protein serine/threonine kinase activity (IEA)	WBGene00013643																														193666_at	0.54052	0.0024	3.7843	0.027361	4.179
187332_s_at	0.53793	0	4.7909	0.01224	6.539	0.474424	0.543568	2.2105	1.51444	68964.6	C37C3.2	C37C3.2	[GO:0003743] MOLECULAR_FUNCTION translation initiation factor activity (IEA) | [GO:0006413] BIOLOGICAL_PROCESS translational initiation (IEA) | [GO:0000003] BIOLOGICAL_PROCESS reproduction (IMP) | [GO:0040010] BIOLOGICAL_PROCESS positive regulation of growth rate (IMP) | [GO:0009792] BIOLOGICAL_PROCESS embryonic development ending in birth or egg hatching (IMP) | [GO:0002119] BIOLOGICAL_PROCESS n…	WBGene00016496																														193674_s_at	0.19505	0.018	3.428	0.037304	5.216
187379_at	0.34686	0.0006	4.3173	0.017652	19.341	0.108542	0.194217	1.82929	1.73577	9359.71	C45G9.2	C45G9.2	[GO:0008033] BIOLOGICAL_PROCESS tRNA processing (IEA) | [GO:0017150] MOLECULAR_FUNCTION tRNA dihydrouridine synthase activity (IEA) | [GO:0050660] MOLECULAR_FUNCTION FAD binding (IEA) | [GO:0003824] MOLECULAR_FUNCTION catalytic activity (IEA) | [GO:0008152] BIOLOGICAL_PROCESS metabolic process (IEA)	WBGene00016674																														193745_at	0.36941	0.0008	5.3628	0.0080772	6.14
187453_at	0.28292	0.0047	3.3718	0.039223	14.602	0.24279	0.547653	3.61118	1.93016	31684.1	K06H7.7	K06H7.7		WBGene00019458																														193888_s_at	0.24184	0.0041	4.823	0.01195	4.315
187522_at	0.31698	0.0024	4.4065	0.016449	7.021	0.147078	0.332358	3.23296	2.15902	10656.1	dct-6	F25B5.1		WBGene00017773																														193926_at	0.41781	0.0019	6.3522	0.0041741	16.898
187542_s_at	0.29013	0.0031	6.755	0.003251	15.86	0.294121	0.713376	1.63639	1.72553	67080	T01G9.2	T01G9.2		WBGene00011344																														193927_s_at	0.44052	0.002	4.6699	0.013415	15.849
187565_at	0.38123	0.0003	3.3266	0.040851	21	0.081207	0.92112	3.73046	2.55795	7734.7	ZK177.1	ZK177.1																																193950_s_at	0.27395	0.0037	14.5649	9.68e-05	6.011
187608_s_at	0.43114	0	3.9021	0.024771	7.976	0.341673	0.529705	5.71933	2.49898	734.339	Y55F3AM.10	Y55F3AM.10		WBGene00021927																														194140_at	0.22857	0.0183	5.4115	0.0078059	4.748
187705_at	0.22567	0.0149	6.1593	0.0047219	9.109	0.0417741	0.676395	4.85781	2.24479	9431.51	T25D10.1	T25D10.1	[GO:0016021] CELLULAR_COMPONENT integral to membrane (IEA)	WBGene00020799																														194153_at	0.50335	0.0025	4.4888	0.015423	15.605
187929_s_at	0.32269	0.0012	3.7672	0.02776	8.088	0.155965	0.672583	2.46201	1.95687	47696	ndg-4	F56F3.2	[GO:0016021] CELLULAR_COMPONENT integral to membrane (IEA) | [GO:0009792] BIOLOGICAL_PROCESS embryonic development ending in birth or egg hatching (IMP) | [GO:0010171] BIOLOGICAL_PROCESS body morphogenesis (IMP) | [GO:0040010] BIOLOGICAL_PROCESS positive regulation of growth rate (IMP)	WBGene00003577																														194186_x_at	0.32643	0.0122	4.9556	0.010829	15.805
187969_s_at	0.42687	0.0001	3.9977	0.022876	5.116	0.620151	0.687765	4.21544	2.65755	1054.81	ncr-1	F02E8.6	[GO:0042632] BIOLOGICAL_PROCESS cholesterol homeostasis (IMP) via [WBPaper00004161] Sym M et al. (2000) | [GO:0040010] BIOLOGICAL_PROCESS positive regulation of growth rate (IMP) via [WBPaper00004161] Sym M et al. (2000) | [GO:0046662] BIOLOGICAL_PROCESS regulation of oviposition (IMP) via [WBPaper00004161] Sym M et al. (2000) | [GO:0040024] BIOLOGICAL_PROCESS dauer larval development (IGI) via […	WBGene00003561																														194188_x_at	0.46634	0.0084	3.5928	0.032262	6.262
188000_at	0.39936	0.0005	8.3722	0.0013055	9.027	0.423117	0.924306	3.13587	2.64154	545.173	itx-1	W03D8.6	[GO:0045216] BIOLOGICAL_PROCESS cell-cell junction assembly and maintenance (TAS) via [WBPaper00019572] Liat Haklai-Topper et al. (2003) International Worm Meeting "Characterization of Intexin (ITX-1) and Neurexin-Like Receptor (NLR-1) | [GO:0016323] CELLULAR_COMPONENT basolateral plasma membrane (IDA) via [WBPaper00019572] Liat Haklai-Topper et al. (2003) International Worm Meeting "Characteriza…	WBGene00002174																														194208_x_at	0.3352	0.0055	4.4761	0.015577	4.954
188121_s_at	0.40649	0.0004	4.0177	0.022501	8.543	0.146821	0.559457	2.56888	2.43575	12047.7	ptr-24	F46G10.5	[GO:0016021] CELLULAR_COMPONENT integral to membrane (IEA) | [GO:0008158] MOLECULAR_FUNCTION hedgehog receptor activity (IEA) | [GO:0016020] CELLULAR_COMPONENT membrane (IEA) | [GO:0009792] BIOLOGICAL_PROCESS embryonic development ending in birth or egg hatching (IMP)	WBGene00004238
188136_at	0.2933	0.0042	3.2888	0.042272	21.304	0.235948	0.569912	2.10528	1.8382	23646.4	spas-1	C24B5.2	[GO:0048477] BIOLOGICAL_PROCESS oogenesis (IMP) via [WBPaper00029440] Matsushita-Ishiodori Y et al. (2007) | [GO:0040025] BIOLOGICAL_PROCESS vulval development (IMP) via [WBPaper00029440] Matsushita-Ishiodori Y et al. (2007) | [GO:0007019] BIOLOGICAL_PROCESS microtubule depolymerization (IDA) via [WBPaper00029440] Matsushita-Ishiodori Y et al. (2007) | [GO:0048471] CELLULAR_COMPONENT perinuclear …	WBGene00016045
188145_at	0.39726	0.0002	3.2822	0.042526	21.008	0.184555	0.42398	2.14834	2.08501	339826	clec-88	K10B2.3	[GO:0005488] MOLECULAR_FUNCTION binding (IEA)	WBGene00019606
188146_s_at	0.43512	0.0004	3.8317	0.026283	20.543	0.296542	0.527575	1.7993	1.70266	1.15695e+06	clec-88	K10B2.3	[GO:0005488] MOLECULAR_FUNCTION binding (IEA)	WBGene00019606
188158_at	0.4491	0.0001	3.7477	0.028227	7.55	0.183552	0.547739	3.38633	2.71384	3888.12	gei-16	T17H7.4	[GO:0009792] BIOLOGICAL_PROCESS embryonic development ending in birth or egg hatching (IMP) | [GO:0002119] BIOLOGICAL_PROCESS nematode larval development (IMP) | [GO:0018996] BIOLOGICAL_PROCESS molting cycle, collagen and cuticulin-based cuticle (IMP) | [GO:0040010] BIOLOGICAL_PROCESS positive regulation of growth rate (IMP) | [GO:0040007] BIOLOGICAL_PROCESS growth (IMP)	WBGene00001573
188215_at	0.34054	0.0013	7.4324	0.002182	21.363	0.283502	0.566088	2.20335	1.76706	45158.9	daf-18	T07A9.6	[GO:0040024] BIOLOGICAL_PROCESS dauer larval development (IGI) via [WBPaper00004702] Lin K et al. (2001) | [GO:0008340] BIOLOGICAL_PROCESS determination of adult life span (IGI) via [WBPaper00004702] Lin K et al. (2001) | [GO:0009408] BIOLOGICAL_PROCESS response to heat (IGI) via [WBPaper00004702] Lin K et al. (2001) | [GO:0042992] BIOLOGICAL_PROCESS negative regulation of transcription factor im…	WBGene00000913
188236_s_at	0.30481	0.0026	5.2421	0.0087979	20.438	0.326104	0.730076	2.66839	2.34059	39985.4	nos-2	ZK1127.1	[GO:0051726] BIOLOGICAL_PROCESS regulation of cell cycle (IGI) via [WBPaper00003762] Subramaniam K et al. (1999) | [GO:0048477] BIOLOGICAL_PROCESS oogenesis (IGI) via [WBPaper00003692] Kraemer B et al. (1999) | [GO:0007281] BIOLOGICAL_PROCESS germ cell development (IGI) via [WBPaper00003762] Subramaniam K et al. (1999) | [GO:0005737] CELLULAR_COMPONENT cytoplasm (IDA) via [WBPaper00003762] Subram…	WBGene00003784
188263_at	0.44958	0	3.3846	0.038776	18.749	0.520454	0.638594	8.82388	2.59386	207.641	ZK945.4	ZK945.4	[GO:0005622] CELLULAR_COMPONENT intracellular (IEA) | [GO:0008270] MOLECULAR_FUNCTION zinc ion binding (IEA) | [GO:0005515] MOLECULAR_FUNCTION protein binding (IEA)	WBGene00014166
188587_s_at	0.37473	0.0002	7.5937	0.0019916	8.701	0.226223	0.429805	2.65324	2.03648	76469.8	ctl-3	Y54G11A.13	[GO:0004096] MOLECULAR_FUNCTION catalase activity (IEA) | [GO:0006979] BIOLOGICAL_PROCESS response to oxidative stress (IEA)	WBGene00013220
188590_s_at	0.31982	0.0006	4.4141	0.016352	20.408	0.227472	0.510455	2.2812	1.80061	4359.14	acbp-5	T12D8.3	[GO:0000062] MOLECULAR_FUNCTION acyl-CoA binding (IEA) | [GO:0005488] MOLECULAR_FUNCTION binding (IEA)	WBGene00011731
188856_at	0.43031	0.0002	3.4148	0.037743	18.467	0.556372	0.633997	5.43348	2.73447	1818.47	K09A11.1	K09A11.1	[GO:0003677] MOLECULAR_FUNCTION DNA binding (IEA) | [GO:0005622] CELLULAR_COMPONENT intracellular (IEA) | [GO:0008270] MOLECULAR_FUNCTION zinc ion binding (IEA)	WBGene00010704
188965_at	0.4046	0.0002	4.427	0.016186	8.714	0.187497	0.578561	7.64697	3.83954	304.721	F55H12.3	F55H12.3	[GO:0005488] MOLECULAR_FUNCTION binding (IEA) | [GO:0005509] MOLECULAR_FUNCTION calcium ion binding (IEA) | [GO:0016021] CELLULAR_COMPONENT integral to membrane (IEA)	WBGene00010134
188969_at	0.53342	0	6.3	0.0043148	7.625	0.571361	0.725075	9.54173	4.21552	16688.8	C15A11.4	C15A11.4	[GO:0016021] CELLULAR_COMPONENT integral to membrane (IEA)	WBGene00007598
189002_s_at	0.22951	0.0169	3.9032	0.024748	22.189	0.122391	0.525094	2.83489	2.041	129125	mex-3	F53G12.5	[GO:0009880] BIOLOGICAL_PROCESS embryonic pattern specification (IMP) via [WBPaper00002572] Draper BW et al. (1996) | [GO:0001708] BIOLOGICAL_PROCESS cell fate specification (IMP) via [WBPaper00002572] Draper BW et al. (1996) | [GO:0048308] BIOLOGICAL_PROCESS organelle inheritance (IMP) via [WBPaper00002572] Draper BW et al. (1996) | [GO:0051148] BIOLOGICAL_PROCESS negative regulation of muscle c…	WBGene00003229
189116_at	0.40619	0.0003	7.4599	0.0021481	8.889	0.118435	0.64271	4.0378	2.57672	3221.6	ver-2	T17A3.8	[GO:0008270] MOLECULAR_FUNCTION zinc ion binding (IEA) | [GO:0004672] MOLECULAR_FUNCTION protein kinase activity (IEA) | [GO:0005524] MOLECULAR_FUNCTION ATP binding (IEA) | [GO:0006468] BIOLOGICAL_PROCESS protein amino acid phosphorylation (IEA) | [GO:0004713] MOLECULAR_FUNCTION protein tyrosine kinase activity (IEA) | [GO:0004674] MOLECULAR_FUNCTION protein serine/threonine kinase activity (IEA)…	WBGene00006895
189121_s_at	0.3498	0.0009	4.3048	0.017828	6.163	0.459233	0.781443	2.01932	1.55928	41290.7	F53F10.2	F53F10.2	[GO:0003824] MOLECULAR_FUNCTION catalytic activity (IEA) | [GO:0006596] BIOLOGICAL_PROCESS polyamine biosynthetic process (IEA)	WBGene00018764
189188_at	0.51044	0	18.9422	2.5472e-05	7.651	0.389731	0.708084	2.54925	1.75674	172490	C49C3.4	C49C3.4		WBGene00008194
189207_at	0.42852	0	3.813	0.026701	9.38	0.315686	0.504114	2.24516	2.11948	608.67	pxl-1	C28H8.6	[GO:0008270] MOLECULAR_FUNCTION zinc ion binding (IEA) | [GO:0002119] BIOLOGICAL_PROCESS nematode larval development (IMP) | [GO:0040007] BIOLOGICAL_PROCESS growth (IMP) | [GO:0040010] BIOLOGICAL_PROCESS positive regulation of growth rate (IMP) | [GO:0009792] BIOLOGICAL_PROCESS embryonic development ending in birth or egg hatching (IMP)	WBGene00016197
189261_at	0.23139	0.0136	3.5411	0.033755	3.989	0.145247	0.350435	2.79147	1.72272	13277	F21A3.2	F21A3.2	[GO:0016787] MOLECULAR_FUNCTION hydrolase activity (IEA) | [GO:0003993] MOLECULAR_FUNCTION acid phosphatase activity (IEA) | [GO:0046872] MOLECULAR_FUNCTION metal ion binding (IEA) | [GO:0016021] CELLULAR_COMPONENT integral to membrane (IEA)	WBGene00008992
189325_at	0.49376	0	4.414	0.016353	7.871	0.315172	0.683495	2.60144	1.82973	7272.57	F02D8.4	F02D8.4	[GO:0004181] MOLECULAR_FUNCTION metallocarboxypeptidase activity (IEA) | [GO:0006508] BIOLOGICAL_PROCESS proteolysis (IEA) | [GO:0008270] MOLECULAR_FUNCTION zinc ion binding (IEA)	WBGene00008521
189387_at	0.25481	0.0082	3.1138	0.049634	9.08	0.103111	0.679474	3.44112	2.53863	4187.86	col-118	T11B7.3	[GO:0016021] CELLULAR_COMPONENT integral to membrane (IEA)	WBGene00000692
189392_s_at	0.36794	0.0006	7.5653	0.0020237	8.88	0.0269482	0.7242	2.15834	1.7605	413371	F28B4.3	F28B4.3	[GO:0005488] MOLECULAR_FUNCTION binding (IEA) | [GO:0040010] BIOLOGICAL_PROCESS positive regulation of growth rate (IMP)	WBGene00017892
189403_s_at	0.37123	0.0001	3.4067	0.03802	3.831	0.235809	0.64383	2.1322	2.24524	8156.71	mrp-5	F14F4.3	[GO:0005524] MOLECULAR_FUNCTION ATP binding (IEA) | [GO:0016887] MOLECULAR_FUNCTION ATPase activity (IEA) | [GO:0000166] MOLECULAR_FUNCTION nucleotide binding (IEA) | [GO:0017111] MOLECULAR_FUNCTION nucleoside-triphosphatase activity (IEA) | [GO:0016021] CELLULAR_COMPONENT integral to membrane (IEA) | [GO:0040010] BIOLOGICAL_PROCESS positive regulation of growth rate (IMP) | [GO:0040002] BIOLOGIC…	WBGene00003411
189515_s_at	0.28951	0.0051	4.405	0.016469	9.776	0.120692	0.919207	3.36611	2.23698	53192.2	C03F11.3	C03F11.3	[GO:0007155] BIOLOGICAL_PROCESS cell adhesion (IEA) | [GO:0016020] CELLULAR_COMPONENT membrane (IEA) | [GO:0016021] CELLULAR_COMPONENT integral to membrane (IEA)	WBGene00015389
189519_at	0.42672	0.0001	4.9289	0.011044	9.091	0.0325011	0.382108	4.46773	2.24249	8961.47	cyp-33C8	R08F11.3	[GO:0004497] MOLECULAR_FUNCTION monooxygenase activity (IEA) | [GO:0005506] MOLECULAR_FUNCTION iron ion binding (IEA) | [GO:0009055] MOLECULAR_FUNCTION electron carrier activity (IEA) | [GO:0020037] MOLECULAR_FUNCTION heme binding (IEA) | [GO:0016021] CELLULAR_COMPONENT integral to membrane (IEA)	WBGene00019967
189597_s_at	0.26821	0.0064	3.3435	0.040234	9.538	0.0712832	0.84796	2.79981	2.59126	299.199	F59F4.1	F59F4.1	[GO:0003995] MOLECULAR_FUNCTION acyl-CoA dehydrogenase activity (IEA) | [GO:0003997] MOLECULAR_FUNCTION acyl-CoA oxidase activity (IEA) | [GO:0005777] CELLULAR_COMPONENT peroxisome (IEA) | [GO:0006631] BIOLOGICAL_PROCESS fatty acid metabolic process (IEA) | [GO:0050660] MOLECULAR_FUNCTION FAD binding (IEA) | [GO:0009055] MOLECULAR_FUNCTION electron carrier activity (IEA) | [GO:0016491] MOLECULAR_…	WBGene00010336
189733_at	0.37949	0.0002	4.9055	0.011237	21.047	0.254989	0.683968	1.6858	1.7181	30510.8	T12A2.8	T12A2.8	[GO:0004518] MOLECULAR_FUNCTION nuclease activity (IEA) | [GO:0006281] BIOLOGICAL_PROCESS DNA repair (IEA) | [GO:0003677] MOLECULAR_FUNCTION DNA binding (IEA) | [GO:0003824] MOLECULAR_FUNCTION catalytic activity (IEA) | [GO:0005634] CELLULAR_COMPONENT nucleus (IEA)	WBGene00020442
189735_at	0.35278	0.0006	4.5414	0.014805	8.072	0.280999	0.469224	4.44391	1.91654	297454	hsp-17	F52E1.7		WBGene00002021
189763_at	0.34994	0.0006	3.5149	0.034543	17.514	0.559479	0.847323	2.37146	1.76622	2069.9	rap-2	C25D7.7	[GO:0005525] MOLECULAR_FUNCTION GTP binding (IEA) | [GO:0007264] BIOLOGICAL_PROCESS small GTPase mediated signal transduction (IEA) | [GO:0003924] MOLECULAR_FUNCTION GTPase activity (IEA) | [GO:0005515] MOLECULAR_FUNCTION protein binding (IEA) | [GO:0006886] BIOLOGICAL_PROCESS intracellular protein transport (IEA) | [GO:0006913] BIOLOGICAL_PROCESS nucleocytoplasmic transport (IEA) | [GO:0007165] …	WBGene00004308
189799_at	0.45013	0.0001	6.0756	0.0049853	8.603	0.198344	0.437324	8.02626	3.26885	3725.17	B0222.3	B0222.3	[GO:0005315] MOLECULAR_FUNCTION inorganic phosphate transmembrane transporter activity (IEA) | [GO:0006817] BIOLOGICAL_PROCESS phosphate transport (IEA) | [GO:0016020] CELLULAR_COMPONENT membrane (IEA) | [GO:0016021] CELLULAR_COMPONENT integral to membrane (IEA)	WBGene00015055
189841_s_at	0.44927	0	4.0648	0.021646	17.342	0.510043	0.753934	6.30977	2.49978	17498.5	grp-1	K06H7.4	[GO:0005086] MOLECULAR_FUNCTION ARF guanyl-nucleotide exchange factor activity (IEA) | [GO:0005622] CELLULAR_COMPONENT intracellular (IEA) | [GO:0032012] BIOLOGICAL_PROCESS regulation of ARF protein signal transduction (IEA)	WBGene00001743
189972_at	0.35952	0.0008	4.0345	0.022191	6.373	0.208242	0.709642	5.77357	2.96532	25796.1	C33C12.3	C33C12.3	[GO:0004348] MOLECULAR_FUNCTION glucosylceramidase activity (IEA) | [GO:0005764] CELLULAR_COMPONENT lysosome (IEA) | [GO:0006665] BIOLOGICAL_PROCESS sphingolipid metabolic process (IEA) | [GO:0007040] BIOLOGICAL_PROCESS lysosome organization and biogenesis (IEA) | [GO:0003824] MOLECULAR_FUNCTION catalytic activity (IEA) | [GO:0005975] BIOLOGICAL_PROCESS carbohydrate metabolic process (IEA) | [GO:…	WBGene00016335
190009_at	0.23182	0.0101	8.1197	0.0014925	0.577	0.162003	0.451116	1.88589	2.57191	99.9122	F49E12.10	F49E12.10	[GO:0005506] MOLECULAR_FUNCTION iron ion binding (IEA) | [GO:0005783] CELLULAR_COMPONENT endoplasmic reticulum (IEA) | [GO:0006633] BIOLOGICAL_PROCESS fatty acid biosynthetic process (IEA) | [GO:0016491] MOLECULAR_FUNCTION oxidoreductase activity (IEA) | [GO:0055114] BIOLOGICAL_PROCESS oxidation reduction (IEA) | [GO:0016021] CELLULAR_COMPONENT integral to membrane (IEA)	WBGene00009903
190037_s_at	0.33739	0.0012	3.3718	0.039224	9.017	0.162587	0.516358	3.13894	2.10317	26683.9	T01C8.5	T01C8.5	[GO:0006520] BIOLOGICAL_PROCESS amino acid metabolic process (IEA) | [GO:0008483] MOLECULAR_FUNCTION transaminase activity (IEA) | [GO:0003824] MOLECULAR_FUNCTION catalytic activity (IEA) | [GO:0009058] BIOLOGICAL_PROCESS biosynthetic process (IEA) | [GO:0030170] MOLECULAR_FUNCTION pyridoxal phosphate binding (IEA) | [GO:0016769] MOLECULAR_FUNCTION transferase activity, transferring nitrogenous g…	WBGene00020146
190101_s_at	0.31051	0.0025	5.0082	0.010418	8.612	0.312395	0.703705	2.62149	2.67142	596.828	dpy-31	R151.5	[GO:0004222] MOLECULAR_FUNCTION metalloendopeptidase activity (IEA) | [GO:0006508] BIOLOGICAL_PROCESS proteolysis (IEA) | [GO:0008237] MOLECULAR_FUNCTION metallopeptidase activity (IEA) | [GO:0009792] BIOLOGICAL_PROCESS embryonic development ending in birth or egg hatching (IMP)	WBGene00006592
190140_at	0.27059	0.0048	3.1541	0.047816	14.176	0.0292963	0.377697	1.86154	1.62934	14034.9	M01A10.1	M01A10.1	[GO:0003723] MOLECULAR_FUNCTION RNA binding (IEA)	WBGene00019692
190165_s_at	0.46552	0.0001	10.2909	0.00051457	8.582	0.376056	0.768333	3.25829	2.31719	10008.2	hum-5	T02C12.1	[GO:0003774] MOLECULAR_FUNCTION motor activity (IEA) | [GO:0005524] MOLECULAR_FUNCTION ATP binding (IEA) | [GO:0016459] CELLULAR_COMPONENT myosin complex (IEA)	WBGene00002038
190258_at	0.22391	0.0158	4.5098	0.015173	8.633	0.0904908	0.23107	2.14853	2.20569	114.59	aman-3	F48C1.1	[GO:0004559] MOLECULAR_FUNCTION alpha-mannosidase activity (IEA) | [GO:0005975] BIOLOGICAL_PROCESS carbohydrate metabolic process (IEA) | [GO:0016021] CELLULAR_COMPONENT integral to membrane (IEA)	WBGene00018594
190298_s_at	0.33103	0.0019	8.723	0.0010892	8.197	0.0726238	0.297557	5.21455	2.43431	45442.4	dhs-14	R05D8.8	[GO:0008152] BIOLOGICAL_PROCESS metabolic process (IEA) | [GO:0016491] MOLECULAR_FUNCTION oxidoreductase activity (IEA) | [GO:0008667] MOLECULAR_FUNCTION 2,3-dihydro-2,3-dihydroxybenzoate dehydrogenase activity (IEA) | [GO:0009239] BIOLOGICAL_PROCESS enterobactin biosynthetic process (IEA) | [GO:0003824] MOLECULAR_FUNCTION catalytic activity (IEA) | [GO:0005488] MOLECULAR_FUNCTION binding (IEA)	WBGene00000977
190403_s_at	0.42689	0	3.9042	0.024728	16.459	0.404264	0.521971	10.6048	3.39331	1467.73	K04C1.3	K04C1.3	[GO:0003700] MOLECULAR_FUNCTION transcription factor activity (IEA) | [GO:0005634] CELLULAR_COMPONENT nucleus (IEA) | [GO:0006355] BIOLOGICAL_PROCESS regulation of transcription, DNA-dependent (IEA) | [GO:0043565] MOLECULAR_FUNCTION sequence-specific DNA binding (IEA)	WBGene00010553
190431_at	0.33892	0.0011	3.4315	0.037188	19.42	0.251797	0.487604	2.84128	1.77177	86313.5	pch-2	F10B5.5	[GO:0005524] MOLECULAR_FUNCTION ATP binding (IEA) | [GO:0000166] MOLECULAR_FUNCTION nucleotide binding (IEA) | [GO:0017111] MOLECULAR_FUNCTION nucleoside-triphosphatase activity (IEA) | [GO:0009792] BIOLOGICAL_PROCESS embryonic development ending in birth or egg hatching (IMP)	WBGene00008641
190456_at	0.31635	0.0019	4.0651	0.021641	20.297	0.0947261	0.376657	3.6764	2.58025	4376.11	E02H4.6	E02H4.6	[GO:0004672] MOLECULAR_FUNCTION protein kinase activity (IEA) | [GO:0005524] MOLECULAR_FUNCTION ATP binding (IEA) | [GO:0006468] BIOLOGICAL_PROCESS protein amino acid phosphorylation (IEA) | [GO:0004674] MOLECULAR_FUNCTION protein serine/threonine kinase activity (IEA)	WBGene00008464
190505_at	0.40939	0.0001	4.6095	0.014049	17.607	0.356236	0.676851	1.98005	1.56615	63050.3	R11H6.5	R11H6.5	[GO:0003723] MOLECULAR_FUNCTION RNA binding (IEA) | [GO:0005524] MOLECULAR_FUNCTION ATP binding (IEA) | [GO:0006955] BIOLOGICAL_PROCESS immune response (IEA) | [GO:0016740] MOLECULAR_FUNCTION transferase activity (IEA)	WBGene00011253
190539_s_at	0.30972	0.0031	3.2509	0.043756	20.431	0.0964292	0.354896	2.73384	2.12336	9187.77	tbx-9	T07C4.6	[GO:0006357] BIOLOGICAL_PROCESS regulation of transcription from RNA polymerase II promoter (ISS) via [WBPaper00002132] Agulnik SI et al. (1995) | [GO:0005634] CELLULAR_COMPONENT nucleus (ISS) via [WBPaper00002132] Agulnik SI et al. (1995) | [GO:0005634] CELLULAR_COMPONENT nucleus (IEA) | [GO:0005667] CELLULAR_COMPONENT transcription factor complex (ISS) via [WBPaper00002132] Agulnik SI et al. (1…	WBGene00006546
190569_at	0.34596	0.0011	3.7176	0.028965	21.27	0.312434	0.645399	1.68407	1.54053	72086	ucr-2.3	T24C4.1	[GO:0003824] MOLECULAR_FUNCTION catalytic activity (IEA) | [GO:0046872] MOLECULAR_FUNCTION metal ion binding (IEA) | [GO:0040019] BIOLOGICAL_PROCESS positive regulation of embryonic development (IMP) | [GO:0009792] BIOLOGICAL_PROCESS embryonic development ending in birth or egg hatching (IMP) | [GO:0000003] BIOLOGICAL_PROCESS reproduction (IMP)	WBGene00020757
190641_s_at	0.30983	0.002	6.7511	0.0032588	8.043	0.173028	0.31102	3.02293	1.5299	13539.2	T14E8.1	T14E8.1	[GO:0004672] MOLECULAR_FUNCTION protein kinase activity (IEA) | [GO:0005524] MOLECULAR_FUNCTION ATP binding (IEA) | [GO:0006468] BIOLOGICAL_PROCESS protein amino acid phosphorylation (IEA) | [GO:0004713] MOLECULAR_FUNCTION protein tyrosine kinase activity (IEA) | [GO:0004674] MOLECULAR_FUNCTION protein serine/threonine kinase activity (IEA) | [GO:0016021] CELLULAR_COMPONENT integral to membrane (…	WBGene00020504
190709_at	0.37328	0.0006	4.6384	0.013741	16.718	0.461137	0.70352	6.43004	1.78059	45828.9	cdk-8	F39H11.3	[GO:0010171] BIOLOGICAL_PROCESS body morphogenesis (IMP) | [GO:0040027] BIOLOGICAL_PROCESS negative regulation of vulval development (IMP) | [GO:0004672] MOLECULAR_FUNCTION protein kinase activity (IEA) | [GO:0005524] MOLECULAR_FUNCTION ATP binding (IEA) | [GO:0006468] BIOLOGICAL_PROCESS protein amino acid phosphorylation (IEA) | [GO:0004713] MOLECULAR_FUNCTION protein tyrosine kinase activity (I…	WBGene00000409
190974_at	0.26121	0.0058	3.9316	0.024167	5.008	0.25263	0.674767	2.57561	1.76856	1471.09	tsp-13	Y39B6A.6	[GO:0016021] CELLULAR_COMPONENT integral to membrane (IEA) | [GO:0030001] BIOLOGICAL_PROCESS metal ion transport (IEA) | [GO:0046872] MOLECULAR_FUNCTION metal ion binding (IEA)	WBGene00006639
190996_at	0.27496	0.0056	3.5133	0.034591	8.28	0.125773	0.465188	4.13114	2.96522	2467.82	ttr-21	F09F3.6		WBGene00008628
191010_s_at	0.2387	0.0124	3.2992	0.041875	8.73	0.197205	0.828044	2.48199	1.57616	523.19	kqt-2	M60.5	[GO:0030421] BIOLOGICAL_PROCESS defecation (IMP) via [WBPaper00017664] Aguan Wei et al. (2001) | [GO:0005249] MOLECULAR_FUNCTION voltage-gated potassium channel activity (ISS) via [WBPaper00017664] Aguan Wei et al. (2001) | [GO:0016021] CELLULAR_COMPONENT integral to membrane (IEA)	WBGene00002234
191017_at	0.46474	0	4.4576	0.015803	7.799	0.53598	0.571247	3.12201	2.26445	73110.9	Y40D12A.2	Y40D12A.2	[GO:0004185] MOLECULAR_FUNCTION serine-type carboxypeptidase activity (IEA) | [GO:0006508] BIOLOGICAL_PROCESS proteolysis (IEA) | [GO:0016021] CELLULAR_COMPONENT integral to membrane (IEA) | [GO:0002119] BIOLOGICAL_PROCESS nematode larval development (IMP) | [GO:0040007] BIOLOGICAL_PROCESS growth (IMP)	WBGene00021503
191119_s_at	0.36974	0.0008	3.6381	0.031019	21.205	0.065096	0.590477	1.86611	1.6743	7444.54	F35G12.4	F35G12.4	[GO:0040010] BIOLOGICAL_PROCESS positive regulation of growth rate (IMP)	WBGene00009441
191274_s_at	0.21183	0.0175	5.5843	0.0069243	8.864	0.0975828	0.460829	3.88932	2.31512	28932.4	pcp-3	F23B2.11	[GO:0006508] BIOLOGICAL_PROCESS proteolysis (IEA) | [GO:0008236] MOLECULAR_FUNCTION serine-type peptidase activity (IEA) | [GO:0016021] CELLULAR_COMPONENT integral to membrane (IEA)	WBGene00003958
191437_at	0.47061	0	3.6246	0.031383	1.913	0.439536	0.614947	1.57122	1.84594	949.647	ifg-1	M110.4	[GO:0005829] CELLULAR_COMPONENT cytosol (IDA) via [WBPaper00024654] Dinkova TD et al. (2004) | [GO:0016281] CELLULAR_COMPONENT eukaryotic translation initiation factor 4F complex (IDA) via [WBPaper00024654] Dinkova TD et al. (2004) | [GO:0005515] MOLECULAR_FUNCTION protein binding (IEA) | [GO:0016070] BIOLOGICAL_PROCESS RNA metabolic process (IEA) | [GO:0000003] BIOLOGICAL_PROCESS reproduction (I…	WBGene00002066
191539_at	0.43148	0.0002	4.0625	0.021686	7.92	0.280439	0.5976	2.91713	1.96859	3590.33	tps-2	F19H8.1		WBGene00006603
191594_at	0.24167	0.0118	3.8407	0.026083	7.951	0.0136481	0.152958	2.04586	1.66011	4973.07	F32B6.9	F32B6.9	[GO:0016021] CELLULAR_COMPONENT integral to membrane (IEA)	WBGene00009323
191708_s_at	0.50652	0	6.244	0.0044718	7.105	0.431922	0.576127	2.60142	1.90063	5335.51	mrp-1	F57C12.5	[GO:0005887] CELLULAR_COMPONENT integral to plasma membrane (IDA) via [WBPaper00026626] Yabe T et al. (2005) | [GO:0005524] MOLECULAR_FUNCTION ATP binding (IEA) | [GO:0006810] BIOLOGICAL_PROCESS transport (IEA) | [GO:0016021] CELLULAR_COMPONENT integral to membrane (IEA) | [GO:0042626] MOLECULAR_FUNCTION ATPase activity, coupled to transmembrane movement of substances (IEA) | [GO:0016887] MOLECUL…	WBGene00003407
191732_s_at	0.43117	0	5.2286	0.0088831	6.398	0.325157	0.831004	2.02924	1.77731	1819.81	C53D5.5	C53D5.5	[GO:0003840] MOLECULAR_FUNCTION gamma-glutamyltransferase activity (IEA) | [GO:0016021] CELLULAR_COMPONENT integral to membrane (IEA)	WBGene00016906
191753_at	0.29793	0.0033	3.5755	0.032755	9.624	0.140427	0.922299	2.89121	2.47729	41896.7	F54F11.2	F54F11.2	[GO:0004222] MOLECULAR_FUNCTION metalloendopeptidase activity (IEA) | [GO:0006508] BIOLOGICAL_PROCESS proteolysis (IEA) | [GO:0016020] CELLULAR_COMPONENT membrane (IEA) | [GO:0016021] CELLULAR_COMPONENT integral to membrane (IEA)	WBGene00010070
191828_at	0.46613	0	12.4198	0.00021144	6.661	0.38947	0.510328	2.52614	1.65777	74084.6	R08E3.1	R08E3.1		WBGene00019957
191892_at	0.3101	0.0031	3.69	0.029659	22.28	0.0395233	0.66961	2.14261	1.90551	3082.7	nfi-1	ZK1290.4	[GO:0040012] BIOLOGICAL_PROCESS regulation of locomotion (IMP) via [WBPaper00026912] Lazakovitch E et al. (2005) | [GO:0043051] BIOLOGICAL_PROCESS regulation of pharyngeal pumping (IMP) via [WBPaper00026912] Lazakovitch E et al. (2005) | [GO:0046662] BIOLOGICAL_PROCESS regulation of oviposition (IMP) via [WBPaper00026912] Lazakovitch E et al. (2005) | [GO:0008340] BIOLOGICAL_PROCESS determination…	WBGene00003592
191926_s_at	0.43273	0	3.9301	0.024198	8.489	0.252377	0.752239	3.74023	3.29506	11716.1	unc-54	F11C3.3	[GO:0030241] BIOLOGICAL_PROCESS muscle thick filament assembly (IMP) via [WBPaper00000233] MacLeod AR et al. (1977) | [GO:0040011] BIOLOGICAL_PROCESS locomotion (IMP) via [WBPaper00000571] Moerman DG et al. (1982) | [GO:0006936] BIOLOGICAL_PROCESS muscle contraction (IMP) via [WBPaper00000571] Moerman DG et al. (1982) | [GO:0048017] BIOLOGICAL_PROCESS inositol lipid-mediated signaling (IPI) via […	WBGene00006789
191948_s_at	0.30742	0.0027	3.3086	0.041524	21.006	0.112038	0.505163	1.73273	1.90349	32613.8	pabp-2	C17E4.5	[GO:0003676] MOLECULAR_FUNCTION nucleic acid binding (IEA) | [GO:0000166] MOLECULAR_FUNCTION nucleotide binding (IEA) | [GO:0040019] BIOLOGICAL_PROCESS positive regulation of embryonic development (IMP) | [GO:0009792] BIOLOGICAL_PROCESS embryonic development ending in birth or egg hatching (IMP) | [GO:0002119] BIOLOGICAL_PROCESS nematode larval development (IMP) | [GO:0040007] BIOLOGICAL_PROCESS …	WBGene00003904
191970_at	0.29498	0.0026	3.4593	0.036282	10.1	0.00418147	0.522069	2.95361	3.60254	94.2989	odd-2	C34H3.2	[GO:0005622] CELLULAR_COMPONENT intracellular (IEA) | [GO:0008270] MOLECULAR_FUNCTION zinc ion binding (IEA) | [GO:0003676] MOLECULAR_FUNCTION nucleic acid binding (IEA) | [GO:0040010] BIOLOGICAL_PROCESS positive regulation of growth rate (IMP) | [GO:0040011] BIOLOGICAL_PROCESS locomotion (IMP) | [GO:0002119] BIOLOGICAL_PROCESS nematode larval development (IMP) | [GO:0040007] BIOLOGICAL_PROCESS g…	WBGene00003846
192073_s_at	0.39518	0.0002	3.736	0.028512	8.307	0.113346	0.426264	3.01029	2.02048	16545.1	zyx-1	F42G4.3	[GO:0000003] BIOLOGICAL_PROCESS reproduction (IMP) via [WBPaper00005583] Smith P et al. (2002) | [GO:0005925] CELLULAR_COMPONENT focal adhesion (ISS) via [WBPaper00005583] Smith P et al. (2002) | [GO:0015629] CELLULAR_COMPONENT actin cytoskeleton (ISS) via [WBPaper00005583] Smith P et al. (2002) | [GO:0005634] CELLULAR_COMPONENT nucleus (IDA) via [WBPaper00031344] Lecroisey C et al. (2007) | [GO:…	WBGene00006999
192124_at	0.4516	0	6.8601	0.0030508	19.719	0.210338	0.47017	4.42016	1.8258	1113.68	T23F11.4	T23F11.4	[GO:0005622] CELLULAR_COMPONENT intracellular (IEA) | [GO:0008270] MOLECULAR_FUNCTION zinc ion binding (IEA)	WBGene00011956
192148_at	0.24379	0.0109	4.4691	0.015662	9.053	0.146592	0.53642	4.19451	2.22323	2910.79	ugt-50	T07C5.1	[GO:0008152] BIOLOGICAL_PROCESS metabolic process (IEA) | [GO:0016758] MOLECULAR_FUNCTION transferase activity, transferring hexosyl groups (IEA) | [GO:0016021] CELLULAR_COMPONENT integral to membrane (IEA)	WBGene00011564
192149_s_at	0.46511	0.0002	3.8585	0.025696	8.246	0.261071	0.620487	3.38108	2.19574	139776	ifb-1	F10C1.2	[GO:0005198] MOLECULAR_FUNCTION structural molecule activity (IEA) | [GO:0009792] BIOLOGICAL_PROCESS embryonic development ending in birth or egg hatching (IMP) | [GO:0008340] BIOLOGICAL_PROCESS determination of adult life span (IMP) | [GO:0018996] BIOLOGICAL_PROCESS molting cycle, collagen and cuticulin-based cuticle (IMP) | [GO:0040011] BIOLOGICAL_PROCESS locomotion (IMP) | [GO:0002119] BIOLOGI…	WBGene00002053
192160_s_at	0.35087	0.0012	4.746	0.012662	9.661	0.124089	0.78689	2.60442	2.81446	2206.83	M03B6.2	M03B6.2	[GO:0005215] MOLECULAR_FUNCTION transporter activity (IEA) | [GO:0006810] BIOLOGICAL_PROCESS transport (IEA) | [GO:0016021] CELLULAR_COMPONENT integral to membrane (IEA)	WBGene00010834
192172_s_at	0.36521	0.0008	3.8054	0.026874	19.205	0.100094	0.451561	4.70631	2.55139	5366.06	EEED8.4	EEED8.4	[GO:0003676] MOLECULAR_FUNCTION nucleic acid binding (IEA) | [GO:0000166] MOLECULAR_FUNCTION nucleotide binding (IEA)	WBGene00017135
192236_at	0.46776	0	8.5789	0.0011726	18.169	0.131846	0.250625	2.66416	1.85673	7226.1	C06G4.1	C06G4.1	[GO:0003723] MOLECULAR_FUNCTION RNA binding (IEA)	WBGene00015557
192238_s_at	0.32984	0.0012	8.2474	0.0013944	4.184	0.25496	0.400348	3.24182	2.24639	473.636	max-1	C34B4.1	[GO:0005856] CELLULAR_COMPONENT cytoskeleton (IEA) | [GO:0005488] MOLECULAR_FUNCTION binding (IEA) | [GO:0040010] BIOLOGICAL_PROCESS positive regulation of growth rate (IMP)	WBGene00003143
192256_at	0.32758	0.0011	3.7312	0.028629	8.965	0.108293	0.512313	3.02433	1.79536	80212.9	C26B9.5	C26B9.5	[GO:0006508] BIOLOGICAL_PROCESS proteolysis (IEA) | [GO:0008236] MOLECULAR_FUNCTION serine-type peptidase activity (IEA)	WBGene00016134
192287_at	0.24682	0.0091	3.2023	0.045742	18.771	0.19136	0.461154	2.00845	1.65122	21347.9	unc-59	W09C5.2	[GO:0018991] BIOLOGICAL_PROCESS oviposition (IMP) via [WBPaper00000496] Horvitz HR et al. (1980) | [GO:0009791] BIOLOGICAL_PROCESS post-embryonic development (IMP) via [WBPaper00000496] Horvitz HR et al. (1980) | [GO:0040011] BIOLOGICAL_PROCESS locomotion (IMP) via [WBPaper00000496] Horvitz HR et al. (1980) | [GO:0032154] CELLULAR_COMPONENT cleavage furrow (IDA) via [WBPaper00004453] Nguyen TQ et…	WBGene00006793
192368_s_at	0.25073	0.0097	4.8721	0.01152	22.129	0.0405236	0.397206	2.73085	1.90278	79067.5	mom-2	F38E1.7	[GO:0001714] BIOLOGICAL_PROCESS endodermal cell fate specification (IMP) via [WBPaper00002870] Thorpe CJ et al. (1997) | [GO:0001714] BIOLOGICAL_PROCESS endodermal cell fate specification (IGI) via [WBPaper00002871] Rocheleau CE et al. (1997) | [GO:0016055] BIOLOGICAL_PROCESS Wnt receptor signaling pathway (ISS) via [WBPaper00002870] Thorpe CJ et al. (1997) | [GO:0000132] BIOLOGICAL_PROCESS estab…	WBGene00003395
192581_s_at	0.52284	0	3.3586	0.039692	6.908	0.545863	0.719777	2.83943	2.51039	51427.3	W05G11.6	W05G11.6	[GO:0004611] MOLECULAR_FUNCTION phosphoenolpyruvate carboxykinase activity (IEA) | [GO:0005525] MOLECULAR_FUNCTION GTP binding (IEA) | [GO:0006094] BIOLOGICAL_PROCESS gluconeogenesis (IEA) | [GO:0017076] MOLECULAR_FUNCTION purine nucleotide binding (IEA)	WBGene00021043
192600_s_at	0.21586	0.0182	4.1236	0.02063	21.578	0.0873998	0.292396	1.97094	1.87645	43112.4	F52B5.2	F52B5.2	[GO:0004672] MOLECULAR_FUNCTION protein kinase activity (IEA) | [GO:0005524] MOLECULAR_FUNCTION ATP binding (IEA) | [GO:0006468] BIOLOGICAL_PROCESS protein amino acid phosphorylation (IEA) | [GO:0004713] MOLECULAR_FUNCTION protein tyrosine kinase activity (IEA) | [GO:0004674] MOLECULAR_FUNCTION protein serine/threonine kinase activity (IEA)	WBGene00009921
192647_at	0.52535	0	3.1152	0.049571	17.832	0.363198	0.445307	2.24613	1.6084	13306.2	sig-7	F39H2.2	[GO:0003676] MOLECULAR_FUNCTION nucleic acid binding (IEA) | [GO:0003755] MOLECULAR_FUNCTION peptidyl-prolyl cis-trans isomerase activity (IEA) | [GO:0000166] MOLECULAR_FUNCTION nucleotide binding (IEA) | [GO:0009792] BIOLOGICAL_PROCESS embryonic development ending in birth or egg hatching (IMP) | [GO:0002119] BIOLOGICAL_PROCESS nematode larval development (IMP) | [GO:0040007] BIOLOGICAL_PROCESS …	WBGene00000890
192696_s_at	0.42315	0	6.4327	0.0039676	19.947	0.517756	0.783284	1.9922	1.66903	26908.3	mre-11	ZC302.1	[GO:0004527] MOLECULAR_FUNCTION exonuclease activity (IEA) | [GO:0006259] BIOLOGICAL_PROCESS DNA metabolic process (IEA) | [GO:0016787] MOLECULAR_FUNCTION hydrolase activity (IEA) | [GO:0009792] BIOLOGICAL_PROCESS embryonic development ending in birth or egg hatching (IMP) | [GO:0051729] BIOLOGICAL_PROCESS germline cell cycle switching, mitotic to meiotic cell cycle (IMP) | [GO:0045132] BIOLOGICA…	WBGene00003405
192711_at	0.25656	0.0066	5.8197	0.0059032	21.744	0.109122	0.533054	2.21863	1.54351	269114	ima-2	F26B1.3	[GO:0051983] BIOLOGICAL_PROCESS regulation of chromosome segregation (IMP) via [WBPaper00005484] Geles KG et al. (2002) | [GO:0007084] BIOLOGICAL_PROCESS mitotic nuclear envelope reassembly (IMP) via [WBPaper00005484] Geles KG et al. (2002) | [GO:0009792] BIOLOGICAL_PROCESS embryonic development ending in birth or egg hatching (IMP) via [WBPaper00005637] Askjaer P et al. (2002) | [GO:0005634] CEL…	WBGene00002073
192929_at	0.36475	0.0007	3.2254	0.044784	21.526	0.0988895	0.220666	9.36757	3.19465	70.9629	F31F6.2	F31F6.2		WBGene00009301
193073_at	0.42193	0.0001	5.2392	0.0088161	7.914	0.240386	0.578431	4.37697	2.24725	28546.9	ifc-2	M6.1	[GO:0005737] CELLULAR_COMPONENT cytoplasm (IDA) via [WBPaper00005492] Karabinos A et al. (2002) Mechanisms of Development "Expression profiles of the essential intermediate filament (IF) | [GO:0030057] CELLULAR_COMPONENT desmosome (IDA) via [WBPaper00005492] Karabinos A et al. (2002) Mechanisms of Development "Expression profiles of the essential intermediate filament (IF) | [GO:0005198] MOLECULA…	WBGene00002056
193108_s_at	0.36433	0.0005	3.9378	0.024042	9.28	0.0708227	0.831943	3.15505	2.25287	12855	mua-6	W10G6.3	[GO:0005198] MOLECULAR_FUNCTION structural molecule activity (IEA) | [GO:0002119] BIOLOGICAL_PROCESS nematode larval development (IMP) | [GO:0040011] BIOLOGICAL_PROCESS locomotion (IMP) | [GO:0009792] BIOLOGICAL_PROCESS embryonic development ending in birth or egg hatching (IMP) | [GO:0018996] BIOLOGICAL_PROCESS molting cycle, collagen and cuticulin-based cuticle (IMP) | [GO:0040007] BIOLOGICAL_P…	WBGene00003485
193342_s_at	0.42666	0	3.9612	0.023579	15.975	0.511361	0.717495	2.63348	2.08877	49590.5	pal-1	C38D4.6	[GO:0001712] BIOLOGICAL_PROCESS ectodermal cell fate commitment (IMP) via [WBPaper00002573] Hunter CP et al. (1996) | [GO:0009790] BIOLOGICAL_PROCESS embryonic development (IMP) via [WBPaper00002573] Hunter CP et al. (1996) | [GO:0009880] BIOLOGICAL_PROCESS embryonic pattern specification (IMP) via [WBPaper00002573] Hunter CP et al. (1996) | [GO:0042693] BIOLOGICAL_PROCESS muscle cell fate commit…	WBGene00003912
193398_s_at	0.22191	0.0159	4.6788	0.013324	20.736	0.4423	0.567944	2.5635	1.82867	29037.1	rskn-1	T01H8.1	[GO:0004672] MOLECULAR_FUNCTION protein kinase activity (IEA) | [GO:0005524] MOLECULAR_FUNCTION ATP binding (IEA) | [GO:0006468] BIOLOGICAL_PROCESS protein amino acid phosphorylation (IEA) | [GO:0004674] MOLECULAR_FUNCTION protein serine/threonine kinase activity (IEA) | [GO:0004713] MOLECULAR_FUNCTION protein tyrosine kinase activity (IEA) | [GO:0000287] MOLECULAR_FUNCTION magnesium ion binding …	WBGene00011352
193668_s_at	0.50246	0	3.2332	0.044467	7.168	0.315394	0.777774	3.35122	2.61879	37618.8	glt-1	C12D12.2	[GO:0005886] CELLULAR_COMPONENT plasma membrane (ISS) via [WBPaper00004458] Rand JB et al. (2000) | [GO:0042995] CELLULAR_COMPONENT cell projection (IDA) via [WBPaper00030901] Mano I et al. (2007) | [GO:0005313] MOLECULAR_FUNCTION L-glutamate transmembrane transporter activity (IDA) via [WBPaper00002806] Kawano T et al. (1997) | [GO:0006835] BIOLOGICAL_PROCESS dicarboxylic acid transport (IEA) | …	WBGene00001620
193751_at	0.30486	0.0023	3.7119	0.029105	7.702	0.178737	0.547799	1.98656	1.76415	3114.34	T04G9.4	T04G9.4	[GO:0000287] MOLECULAR_FUNCTION magnesium ion binding (IEA) | [GO:0008897] MOLECULAR_FUNCTION holo-[acyl-carrier-protein] synthase activity (IEA) | [GO:0009059] BIOLOGICAL_PROCESS macromolecule biosynthetic process (IEA) | [GO:0009792] BIOLOGICAL_PROCESS embryonic development ending in birth or egg hatching (IMP) | [GO:0040011] BIOLOGICAL_PROCESS locomotion (IMP) | [GO:0040010] BIOLOGICAL_PROCESS…	WBGene00020215
193765_at	0.33026	0.0023	4.2713	0.018311	9.028	0.167612	0.758936	4.81906	3.39293	1536.11	eps-8	Y57G11C.24	[GO:0005903] CELLULAR_COMPONENT brush border (IDA) via [WBPaper00024614] Croce A et al. (2004) | [GO:0002119] BIOLOGICAL_PROCESS nematode larval development (IMP) | [GO:0040007] BIOLOGICAL_PROCESS growth (IMP) | [GO:0040010] BIOLOGICAL_PROCESS positive regulation of growth rate (IMP) | [GO:0040011] BIOLOGICAL_PROCESS locomotion (IMP) | [GO:0009792] BIOLOGICAL_PROCESS embryonic development ending …	WBGene00001330
193898_at	0.37427	0.0002	4.4283	0.016169	19.395	0.125442	0.509485	5.72979	2.42438	333.567	ref-1	T01E8.2	[GO:0045138] BIOLOGICAL_PROCESS tail tip morphogenesis (IGI) via [WBPaper00025236] Ross JM et al. (2005) | [GO:0009957] BIOLOGICAL_PROCESS epidermal cell fate specification (IGI) via [WBPaper00025236] Ross JM et al. (2005) | [GO:0000122] BIOLOGICAL_PROCESS negative regulation of transcription from RNA polymerase II promoter (IGI) via [WBPaper00025236] Ross JM et al. (2005) | [GO:0005634] CELLULAR…	WBGene00004334
193924_at	0.29629	0.0033	5.0531	0.010083	8.748	0.1062	0.709227	2.84303	2.12837	2429.99	pgp-3	ZK455.7	[GO:0005524] MOLECULAR_FUNCTION ATP binding (IEA) | [GO:0006810] BIOLOGICAL_PROCESS transport (IEA) | [GO:0016021] CELLULAR_COMPONENT integral to membrane (IEA) | [GO:0042626] MOLECULAR_FUNCTION ATPase activity, coupled to transmembrane movement of substances (IEA) | [GO:0016887] MOLECULAR_FUNCTION ATPase activity (IEA) | [GO:0000166] MOLECULAR_FUNCTION nucleotide binding (IEA) | [GO:0017111] MOL…	WBGene00003997
193942_s_at	0.39944	0.0004	5.1135	0.0096493	19.579	0.494546	0.78554	2.00773	1.82058	24046.3	pak-2	C45B11.1	[GO:0004672] MOLECULAR_FUNCTION protein kinase activity (IEA) | [GO:0005524] MOLECULAR_FUNCTION ATP binding (IEA) | [GO:0006468] BIOLOGICAL_PROCESS protein amino acid phosphorylation (IEA) | [GO:0004713] MOLECULAR_FUNCTION protein tyrosine kinase activity (IEA) | [GO:0004674] MOLECULAR_FUNCTION protein serine/threonine kinase activity (IEA)	WBGene00006443
194202_x_at	0.26877	0.0067	3.218	0.045089	22.691	0.000496373	0.680741	1.74213	1.67579	9700.25	ZK973.9	ZK973.9		WBGene00022835
194223_x_at	0.29979	0.0027	3.1266	0.049048	10.056	0.130409	0.386437	1.62928	1.55332	508538	nspc-6	C03G5.13		WBGene00044357
194228_x_at	0.36502	0.0002	3.3778	0.039013	8.645	0.172007	0.496796	3.20312	1.90375	61600.6	T22H2.6	T22H2.6	[GO:0016021] CELLULAR_COMPONENT integral to membrane (IEA)	WBGene00011936
194252_x_at	0.22072	0.0187	3.2052	0.04562	2.209	0.182026	0.404871	2.73861	4.64076	3960.62	ram-2	F38A3.2	[GO:0007423] BIOLOGICAL_PROCESS sensory organ development (IMP) via [WBPaper00018148] Joanne C N Tam et al. (2001) | [GO:0016477] BIOLOGICAL_PROCESS cell migration (IGI) via [WBPaper00019612] Chung N Tam et al. (2003) | [GO:0009792] BIOLOGICAL_PROCESS embryonic development ending in birth or egg hatching (IGI) via [WBPaper00019612] Chung N Tam et al. (2003) | [GO:0042329] MOLECULAR_FUNCTION struc…	WBGene00004300
194267_x_at	0.6171	0	4.3577	0.017095	18.522	0.381147	0.649825	2.62627	1.99034	1249.44	Y55D9A.2	Y55D9A.2	[GO:0003676] MOLECULAR_FUNCTION nucleic acid binding (IEA) | [GO:0005622] CELLULAR_COMPONENT intracellular (IEA)	WBGene00013224
[truncated: 8 more columns]
